# Supplementary material for: MicroRNA evolution, expression, and function during short germband development in Tribolium castaneum
Source: PubMed Central journal article supplement (PMC4691753; doi:10.1101/gr.193367.115), 2016-01

# Supplemental Figure 1

A

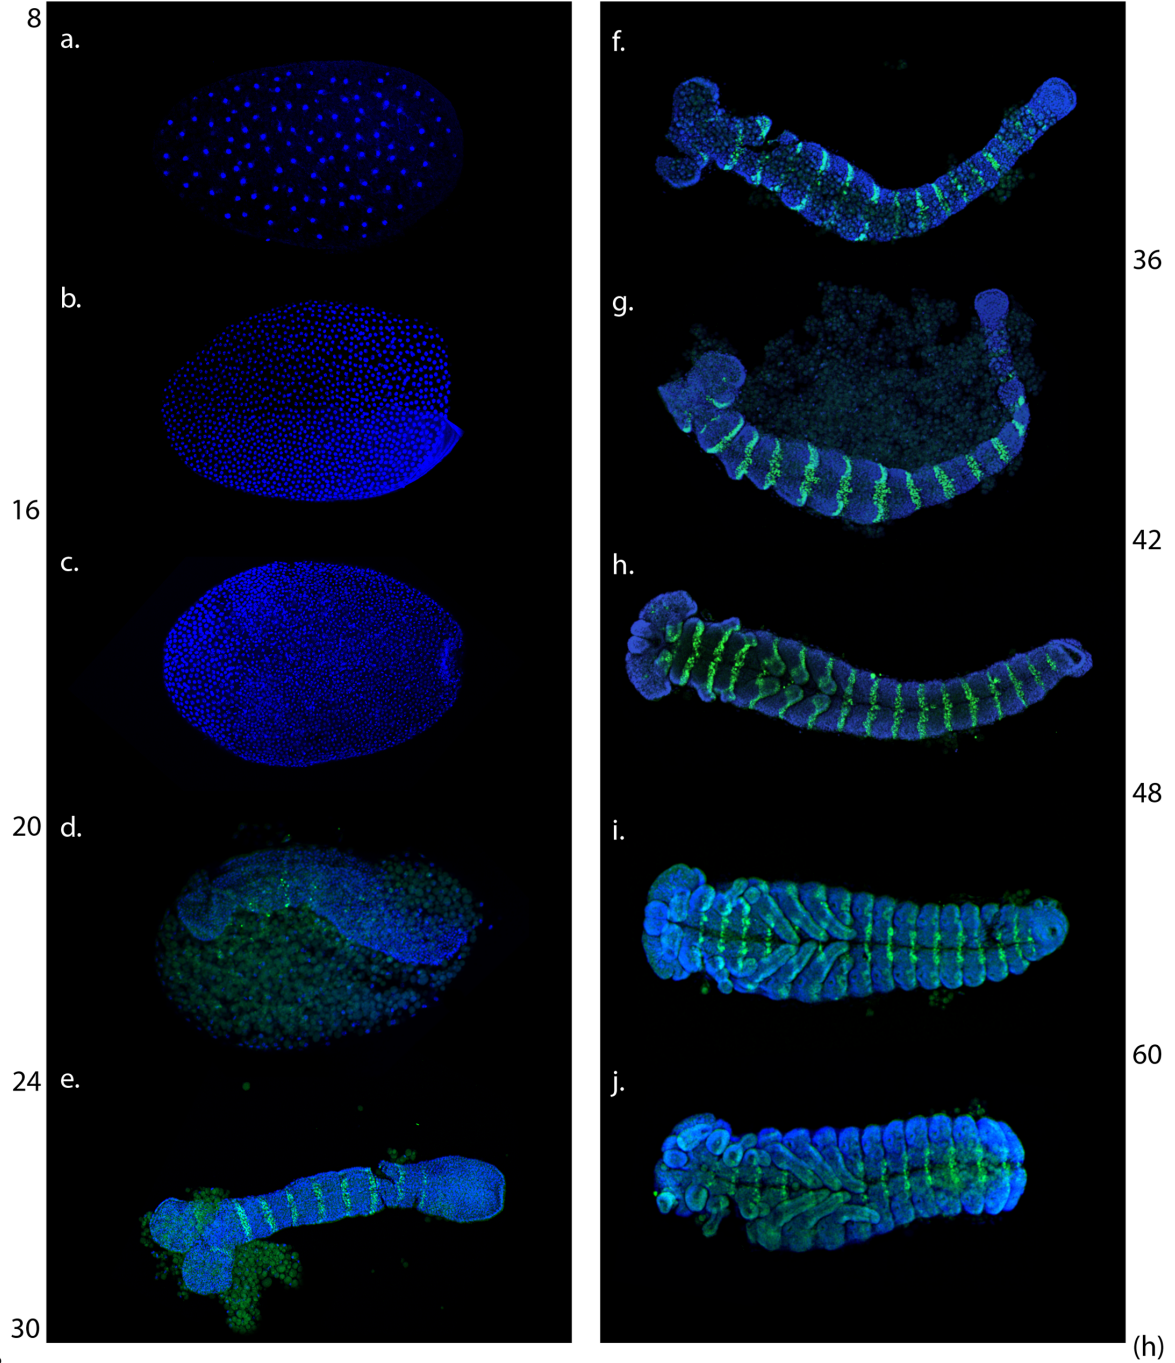

B

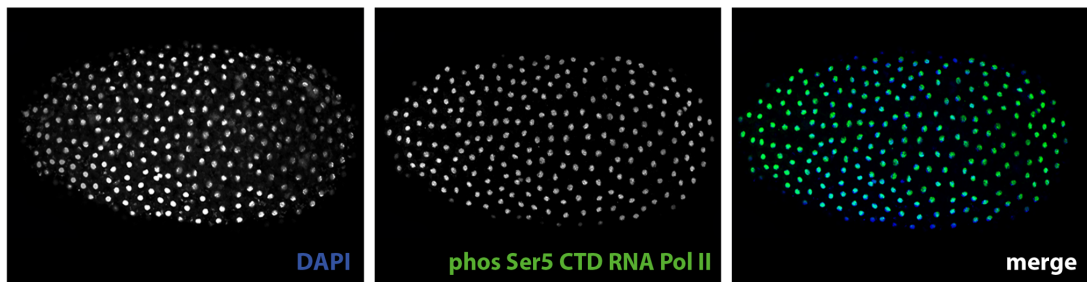



### Supplemental Figure 3

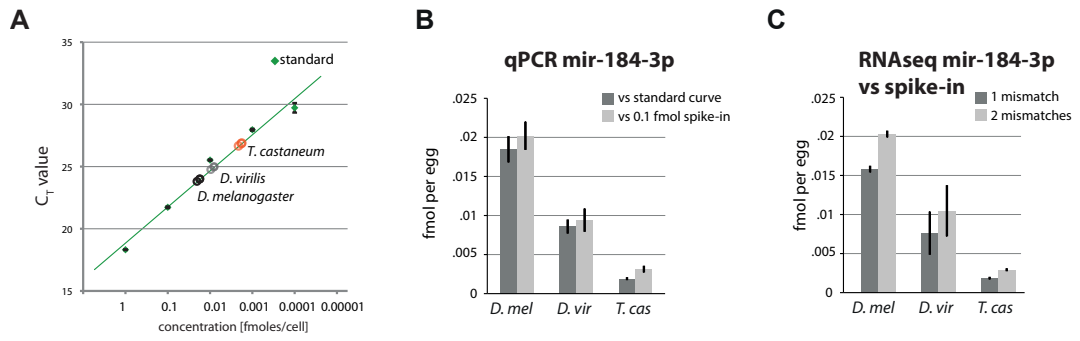

## Supplemental Figure 4

A

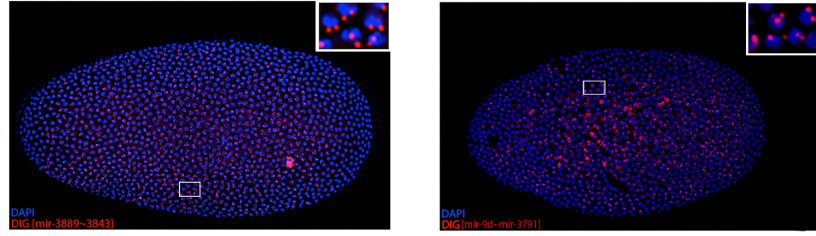

B

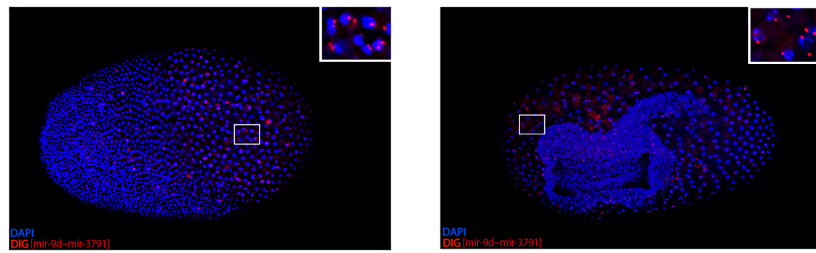

## Supplemental Figure 5

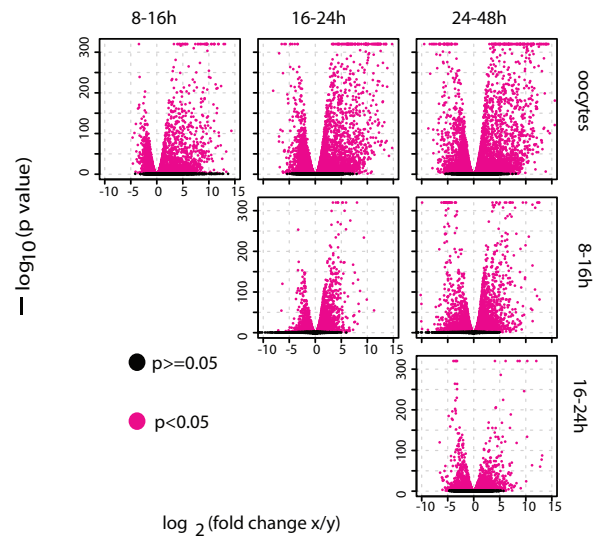

Supplement: supp_gr.193367.115_Supplemental_Figures.pdf [file supp_gr.193367.115_Supplemental_Figures.pdf]
