# Supplementary material for: MicroRNA evolution, expression, and function during short germband development in Tribolium castaneum
Source: Genome Res. 2016 Jan;26(1):85–96. doi: 10.1101/gr.193367.115 (PMC4691753; doi:10.1101/gr.193367.115)
Supplement: Supplemental Material [file supp_gr.193367.115_Supplemental_Table1.xlsx]

## Sheet: Sheet1
Supplementary Table 1. Genomic coordinates, sequencing and conservation of known and newly annotatedT. castaneummicroRNAs by dormir, mirdeep2 or both algorithms. Mature sequences are determined based on the most highly expressed sequence from each hairpin arm.
Name	Prediction algorithm	Chromosome	Start	End	Stemloop	Mature 5p	Mature 3p	family (conserved/specific)	Drosophila homolog
tca-bantam	known	ChLG3	17668731	17668811	TCAGCGAGACGAAACTGGTTTTCACAGTGATTTGACAGATATATTTGATTCTGAGATCATTGTGAAAGCTGATTTTGTTCA	CTGGTTTTCACAGTGATTTGAC	TGAGATCATTGTGAAAGCTGATT	bantam	dme-bantam
tca-let-7	known	ChLG6	4533422	4533499	GTCTGTTTGAGGTAGTAGGTTGTATAGTAAGTATTACACCTATTGGGAGTGCTGTACAGCCTGCTAACTTTCCCAGAC	TGAGGTAGTAGGTTGTATAGTAA	CTGTACAGCCTGCTAACTTTCC	let-7	dme-let-7
tca-mir-1	known	ChLG5	10252845	10252916	TTCGCGAGTTCCGTGCTTCCTTACTTCCCATAGTGCTTTAAACGTATGGAATGTAAAGAAGTATGGAGCGAA	CCGTGCTTCCTTACTTCCCATA	TGGAATGTAAAGAAGTATGGAG	mir-1	dme-mir-1
tca-mir-10	known	ChLG2	8102694	8102764	CTCTACATCTACCCTGTAGATCCGAATTTGTTTGAAATCAGGCGACAAATTCGGTTCTAGAGAGGTTTGTG	TACCCTGTAGATCCGAATTTGT	CAAATTCGGTTCTAGAGAGGTTT	mir-10/100/125/993	dme-mir-10
tca-mir-100	known	ChLG6	4533288	4533363	ATCCGGTGGAACCCGTAGATCCGAACTTGTGGGGCTGTGGTCACAAGTTCTTGTTTATGGGTACCTACTGGTAGAA	AACCCGTAGATCCGAACTTGTG	CAAGTTCTTGTTTATGGGTACC	mir-10/100/125/993	dme-mir-100
tca-mir-1000	known	ChLG2	1618878	1618977	ACGGCTCGGCCATGATATTGTCCTGTCACAGCAGTACTGGTTCCGAGTTACTGCTGCTTCGGGACATGACCATGGCCGGGCCTCTTGGCCGACGCCGCCC	ATATTGTCCTGTCACAGCAGTA	CTGCTGCTTCGGGACATGACCA	mir-1000	dme-mir-1000
tca-mir-11	known	Unmapped45	71290	71395	CAAACGCTTACATTGTAAATGCATTCTGGGATTCTGACTGTGACCTGTGTGTGTCTGATTCACATCACAGGCAGAGTTCTAGCTATGCGTTTACAGCTTGCTTCTC	TGGGATTCTGACTGTGACCTGTG	CATCACAGGCAGAGTTCTAGCT	mir-11	dme-mir-11
tca-mir-1175	known	ChLG4	9316972	9317076	CGCTTTGATCGAGCTCTGTAAAGTAAGTGGAGCAGTGGTCTCTTCACTTGGTTTTTATAGTGAGATTCAACTCCTCCATCTCATTTTTTGAGCTCGTTTACAACG	AAGTGGAGCAGTGGTCTCTTCACT	TGAGATTCAACTCCTCCATCTCA	mir-1175	-
tca-mir-12	known	ChLG3	19663493	19663579	TAAAAGTTCAGGGTTTGAGTATTACATCAGGTACTGGTTCGGTTTTGAAAAACCGGTCCCTGAGTAACACTTACATTCTGGCTTTTA	TGAGTATTACATCAGGTACTGGT	CGGTCCCTGAGTAACACTTACA	mir-12	dme-mir-12
tca-mir-124	known	ChLG5	13288829	13288907	GTCATTCTCCTAGTGTTCACTGTTGGCCTGTATGTTTTTGTAACGCATAAGGCACGCGGTGAATGCCAAGAGCAGACTT	AGTGTTCACTGTTGGCCTGTATG	TAAGGCACGCGGTGAATGCCAA	mir-124	dme-mir-124
tca-mir-125	known	ChLG6	4533611	4533687	ATTTGCCTATTCCCTGAGACCCTAACTTGTGATGTTAAATGGACTCTCACAAGCTAGCGACTCGGGTATTGGCGGAT	TCCCTGAGACCCTAACTTGTGA	ACAAGCTAGCGACTCGGGTAT	mir-10/100/125/993	dme-mir-125
tca-mir-133	known	ChLG5	10226396	10226479	GCAATGTGCAGCTTTAGCTGGTTGAATCCGGGTCAAATTGTAAATGCTATTTGGTCCCCTTCAACCAGCTGTGGTTGACATTGC	AGCTGGTTGAATCCGGGTCAAAT	TTGGTCCCCTTCAACCAGCTGT	mir-133	dme-mir-133
tca-mir-137	known	ChLG7	3688025	3688101	TGGTTGGTCACGTGTATTCTTGGGTAATTAACACATATTCAGGGATGTTATTGCTTGAGAATACACGTAGCTGACAA	ACGTGTATTCTTGGGTAATTAAC	TTATTGCTTGAGAATACACGT	mir-137	dme-mir-137
tca-mir-13a	known	ChLG3	562623	562702	GAGATGCCCAAGTCGTCAATTTGGTTGTGAACTCTTAATTTAAACGATATCACAGCCACTTTGATGAGCTTGGTTGTCTT	TCGTCAATTTGGTTGTGAACT	TATCACAGCCACTTTGATGAGCT	mir-2/13	dme-mir-13a
tca-mir-13b	known	ChLG3	562739	562812	TGCCCTATCAGTCAATTTGGTTGTGAAACCTAGTATTTATTCGGGTATCACAGCCATTTTGACGAGTTTGGTTG	CAGTCAATTTGGTTGTGAAACC	TATCACAGCCATTTTGACGAGTT	mir-2/13	dme-mir-13b-1,2
tca-mir-14	known	ChLG3	2755793	2755879	GACTCCAATGGGTGAACAGGGGAGCGGATTGGACTTACTTTTTTTCAAACAGTCAGTCTTTTTCTCTCTCCTATTAATCCATTCGAT	AGGGGAGCGGATTGGACTTACT	TCAGTCTTTTTCTCTCTCCTAT	mir-14	dme-mir-14
tca-mir-184	known	ChLG7	8771100	8771178	TTTTCTTCCAGTCCCTTGTCATTCTCTCGCCCGGTGTATTTTAACAACTGGACGGAGAACTGATAAGGGCTTGTGGGAA	CCTTGTCATTCTCTCGCCCGGT	TGGACGGAGAACTGATAAGGGC	mir-184	dme-mir-184
tca-mir-190	known	ChLG7	782727	782812	GTGAGTTGCTATAAGATATGTTTGATATTCTTGGTTGTATTTTTAATTCACCCAGGAGTCAAACATATTATTATAGAAGCGTCACG	AGATATGTTTGATATTCTTGGTTG	CCCAGGAGTCAAACATATTATTA	mir-190	dme-mir-190
tca-mir-193	known	ChLG8	4707070	4707166	GCAAACTGGTCGTAATGGTTTGGGCCTTATAGGTTCAGTTGATCATTTTTAAAGCTACTGGCCTGTTAAGTCCCAAGTTATTACATTGCCGGAAGCT	no reads	TACTGGCCTGTTAAGTCCCAAG	mir-193	dme-mir-193
tca-mir-210	known	ChLG4	6990664	6990739	CTCACTGCAGCTGCTGGACGCTGCACAAGATTAGATATTTTAGAACTCTTGTGCGTGTGACAGCGGCTATTGTGGG	AGCTGCTGGACGCTGCACAAGA	CTTGTGCGTGTGACAGCGGCT	mir-210	dme-mir-210
tca-mir-219	known	ChLG3	5243252	5243329	TTTCAGGCCCTGATTGTCCAAACGCAATTCTTGTTTGCAATTTTATCAAGGACTGTGTGTGGACATCATCGCTTGAGA	TGATTGTCCAAACGCAATTCTTG	AGGACTGTGTGTGGACATCATC	mir-219	dme-mir-219
tca-mir-252a	known	ChLG9	6637894	6637980	AAAGACTGTCCTGTTACTAAGTACTAGTGCCGCAGGAGTACATTCGACCTCCTGCTGCTCAAGTGCTTATCAATGGGCACAGAATGA	CTAAGTACTAGTGCCGCAGGAG	CTGCTGCTCAAGTGCTTATCA	mir-252	dme-mir-252
tca-mir-252b	known	ChLG9	6629979	6630072	GCCTCTTGTCCACCCGGTATTAAGTAGTTGCGCCGAAGGTGATGTTTTTGAAATCTCCTCGGTCTGGCTGCTTTATACCGCATGGATGAAAATC	TTAAGTAGTTGCGCCGAAGGTGA	TCCTCGGTCTGGCTGCTTTATA	mir-252	dme-mir-252
tca-mir-263a	known	ChLG5	13054978	13055068	GTGAGCATAGGCCTGCGAATGGCACTGGAAGAATTCACGGGGTTCTTCGCACTCCCGTGGACTTTGAGTGCCATCCTCAGAGCCCTTGTCC	AATGGCACTGGAAGAATTCACGGG	CGTGGACTTTGAGTGCCATCCT	mir-263	dme-mir-263
tca-mir-263b	known	ChLG3	4441784	4441858	CTTACGAACCTTGGCACTGGAAGAATTCACAGATTGTATTTGAATCGTGATTCTTTTAATGCCATATTTCGTGGG	CTTGGCACTGGAAGAATTCACAGA	GTGATTCTTTTAATGCCATATT	mir-263	dme-mir-263
tca-mir-275	known	ChLG9	10587608	10587678	GCTACGCGTGTTACCTCAGTACCTAGGCTGGGGTTTTTCGAAAGTCAGGTACCTGAAGTAGCGCGCGCAGC	CGTGTTACCTCAGTACCTAGGCT	TCAGGTACCTGAAGTAGCGCGCG	mir-275	dme-mir-275
tca-mir-276	known	ChLG3	12023434	12023504	TAGACCACTAGCGAGGTATAGAGTTCCTACGTGATTTTTCGGCTGTAGGAACTTCATACCGTGCTCTTGGA	AGCGAGGTATAGAGTTCCTA	TAGGAACTTCATACCGTGCTCT	mir-276	dme-mir-276
tca-mir-2765	known	ChLG10	4216016	4216141	AAAAGTACCGAAATTCTTGGATATAGTGAGGAGTGGTAACTCCACCACCGTTGGCGTGTGTTGTACTGCCAGCGGTCGAGGAGTTCCTTAACCTCGCTGTAATTCTCCAAAGGACAAGGTAAGTTG	TGGTAACTCCACCACCGTTGGC	CAGCGGTCGAGGAGTTCCTTAA	mir-2765	-
tca-mir-277	known	ChLG7	13758830	13758910	GTGGGCTCCGTGCCAGATGCGCGTTTACACTGCACCGTTCTAAAGAATTCTGTAAATGCACTATCTGGTACGACAGCCCAC	no reads	TAAATGCACTATCTGGTACGAC	mir-277	dme-mir-277
tca-mir-2788	known	ChLG8	4706940	4707035	GACATTTGTTTATGCAATTTTGGGGTTTCTTAGCGGCATTTGCCTCAAATTACACTGCAATGCCCTTGGAAATCCCAAACATGCATGACGACTCAA	TTGGGGTTTCTTAGCGGCATTTGC	CAATGCCCTTGGAAATCCCAAA	mir-2788	-
tca-mir-2796	known	ChLG2	14198660	14198817	ATCGAGCTTTCGGTGCAGAAGCCGCTATTAACGTGGTGACGCAAGAGTAGGGGTTTCTTTCGGCCTCCAGCGGATAATAAAGAGTTGTAGGCCGGCGGAAACTACTTGCTTTTACGTTGCATTACCTTCGCTGCGGCTTCCCGTCAATGATGCGTTTT	AGGGGTTTCTTTCGGCCTCCAG	GTAGGCCGGCGGAAACTACTTGC	mir-2796	-
tca-mir-279a	known	ChLG7	7544158	7544222	CTTGATGGGTTCGGGTCTAGTGGCACGGTTTTTTCAACTTCGTGACTAGATCCACACTCATTAAG	GATGGGTTCGGGTCTAGTGGCACG	TGACTAGATCCACACTCATTAA	mir-279/996	dme-mir-279a
tca-mir-279d	known	ChLG7	7543987	7544128	ATCAAGAGTGGCCCCAAAAACCAATGAAAACACTGTGTTGGCGATTGTGGGTTTAGTCCACGTTTTAGTAAACCGTGACTAGATCCATACTCGTCTATAGAGGTTTTTAGCACGACTTGGGCCCCACAAGCCAACTCCTCCA	TGGCGATTGTGGGTTTAGTCCACG	TGACTAGATCCATACTCGTCT	mir-279/996	dme-mir-996
tca-mir-279c	known	ChLG3	15204345	15204456	TTTCGCCGCTTAAATTCATATTTTTTTCGGGTGTTCGTTTCGAGTCACATTGTGATTGATTTTGTGACTAGATCGAACATTCGCTCGAAGTATGGAAAAATCCGCGGGACTT	CGGGTGTTCGTTTCGAGTCACA	TGACTAGATCGAACATTCGCT	mir-279/996	dme-mir-996,279,286
tca-mir-279b	known	ChLG7	7543987	7544128	GGTAGTTATCCTAAAGTTTTTGATGGGTGAGGGTTTGGTGCATGTTTTATTTTAATCATGACTAGATCCACACTCATCCAAAAATTTGGTGT	GATGGGTGAGGGTTTGGTGCATG	TGACTAGATCCACACTCATCCA	mir-279/996
tca-mir-279e	known	ChLG9	11200	11294	CGGTGGAGCTCTCGGTGTAAGCCAGTGTTCAGTCTATTGTTTCACATTGGTTTCGATTGTGACTAGATCGAACACTCGCTTGCAACCTGGGTTTG	GCCAGTGTTCAGTCTATTGTTTCACA	TGACTAGATCGAACACTCGCTT	mir-279/996
tca-mir-281	known	ChLG7	1524911	1524977	TCGAAAATGAAGAGAGCTATCCGTCGACAGTATATAATTTACACTGTCATGGAGTTGCTCTCTTTAT	AAGAGAGCTATCCGTCGACAGT	CTGTCATGGAGTTGCTCTCTTTA	mir-281	dme-mir-281-1,2
tca-mir-282	known	ChLG7	9033595	9033667	TGTAGAGGTAGCCTCTCCTAGGCTTTGTCTGTGAATTTGGCCGAGACATAGCCTGATTGAGGCTAACTTTAGC	TAGCCTCTCCTAGGCTTTGTCT	ATAGCCTGATTGAGGCTAAC	mir-282	dme-mir-282
tca-mir-283	known	ChLG3	19667898	19667973	GTTGTCTGTGAAATATCAGCTGGTAATTCTGGGTTGATGAGATCCCAGAATATCGACTGATATTATCATAAACAAC	AAATATCAGCTGGTAATTCTGGG	CAGAATATCGACTGATATTATC	mir-283	dme-mir-283
tca-mir-29	known	ChLG9	2711697	2711826	TTTGTGGTGGAACAATAGTTGTAGGATTTGGCTTTGGGCACTGTTTTCGTGTGGTGGTGAGATTTTATTTTGATTCTAGCACCATATGAAATCAGTTCTTGTACCAAATACCAGCGAAATACACCAAGTG	ACTGTTTTCGTGTGGTGGTGAGA	TAGCACCATATGAAATCAGTTC	mir-29/285	dme-mir-285
tca-mir-2944a	known	ChLG3	15204224	15204312	AACTCGCTGAAACTGTGGAGGAACTATTGGTGTGATTTGTTCATTTAATCATATCACAGCCATTAGTTACTTCACAGTTTCAGTATTTT	GAGGAACTATTGGTGTGATTTG	TATCACAGCCATTAGTTACTTCA	mir-5/6/2944/994	dme-mir-5/6/944
tca-mir-2944b	known	ChLG5	7174149	7174250	ACTTCATTTCGCATAATGCATTTAAGGAACTACAGGTGTGATGTGTGATTTCATTAAACGTATCACAGCCGTAGTTGCCTTACTGTATTTGTGAAATCTCAA	TAAGGAACTACAGGTGTGATGTG	TATCACAGCCGTAGTTGCCTTAC	mir-5/6/2944/994
tca-mir-2944c	known	ChLG9	10955	11064	GCCGAGCGACACTCAGGGAATCTGGCTTGAAGGAACTTCTGGTGTGATATGTATTTATCAATATATCACAGCCAGTAGTTACCTACGAAATGGGTTCCCGATTGCAACAG	GAAGGAACTTCTGGTGTGATATG	TATCACAGCCAGTAGTTACCTACGA	mir-5/6/2944/994
tca-mir-2a	known	ChLG3	562865	562952	TTTATGTGCTGTGTCGCTCATCAACTGGATGTGAAATGGATTTGTAGCTCATATCACAGCCAGCTTTGATGAGCGCTACAACATCTAA	CGCTCATCAACTGGATGTG	TATCACAGCCAGCTTTGATGAGCG	mir-2/13	dme-mir-2a-1,2
tca-mir-2b	known	ChLG3	563018	563102	GGTGTAGGCTTTCGCTCATCATCTGGTTGTGAAATGTGAATTTATATCATATCACAGCCAGCTTTGATGAGCGCAAGAGTGCACT	GCTCATCATCTGGTTGTGAAATG	TATCACAGCCAGCTTTGATGAGCG	mir-2/13	dme-mir-2b-1,2
tca-mir-2c	known	ChLG3	562500	562582	AGTCTTGTCTGTCCTTATCAGAGTTGGCGGTTTTAGATTAACTGATTCTATCACAGCCAGCTTTGATGAGCACAGTTGAGATT	CTTATCAGAGTTGGCGGTTTTA	TCACAGCCAGCTTTGATGAG	mir-2/13	dme-mir-2c
tca-mir-304	known	ChLG5	10019932	10020024	ATGCAATAGACTAAATCTCAAATTGTAAATGTGTACCTATTGTTTAAATAATTTTAAGTACGCCTTTAATAAATTGAGATCGGGACCATTTCC	TCGGGAAGACAGTTGCGGCGGATT	TCCGTTCGCTGCATTCCCAGCC	mir-3049	-
tca-mir-3049	known	ChLG6	4999022	4999192	ATGTGGTGGAACGATACGATGGTGAGTGGGGGCGCAGGGACATGGGGGCGCCACATGGGGTCGGGAAGACAGTTGCGGCGGATTTCGTTTTTTCAAGTCCGTTCGCTGCATTCCCAGCCCGGTGTCGTGCCGAGGCAGCAAGGGGGCGCTCAGGCTAGGAGGTTGTTTACA	ATTGTACTTCATCAGGTGCTCTGG	CGACACCTGTTGGAGTGCACTAA	-	-
tca-mir-305	known	ChLG9	10587469	10587543	CACATGTCTATTGTACTTCATCAGGTGCTCTGGTATACTTTTTCCCGACACCTGTTGGAGTGCACTAATTATGTG	GACTCACTCAACCTGGGTGTGA	TCACAACCTCCTTGAGTGAGC	mir-305	dme-mir-305
tca-mir-307	known	ChLG8	12648348	12648415	GGTGACTCACTCAACCTGGGTGTGATGTGTTTGCTGTACCATCACAACCTCCTTGAGTGAGCGACCGG	CGCAGGATTTGCTTGTGAATGG	AATCACAGGAAAATTCTG	mir-307	dme-mir-307
tca-mir-308	known	ChLG2	4378800	4378902	TCAAATGGGGTAATTGGCGCCCTGCGCAGGATTTGCTTGTGAATGGGTGTGCTTGATTCAATCACAGGAAAATTCTGTGCGGGGAGTTGGTTTTGTCACCACA	AGATGAACTCGACTCGGCTGATG	TCACTGGGTTCAGTTTGTCCAA	mir-308	dme-mir-308
tca-mir-309a	known	ChLG5	7174273	7174360	AAAACGCTAATCTGTTAGATGAACTCGACTCGGCTGATGATAAAAAAAACATCACTGGGTTCAGTTTGTCCAATGGTTTTAGCTAAAA	CGACTAACTCGATTCAGTTGATG	TCACTGGGTTGAGTTTGTCTCG	mir-3/309	dme-mir-3/309
tca-mir-309b	known	ChLG5	7175766	7175855	CATTTGCCCATCACATCTCGACTAACTCGATTCAGTTGATGTTAATTAGATATCACTGGGTTGAGTTTGTCTCGATGTTTTGTGCCCATC	AGGCAAGATGTCGGCATAGCTGA	no reads	mir-3/309	dme-mir-3/309
tca-mir-31	known	ChLG7	5322477	5322553	GAGGCAGAGCAGGCAAGATGTCGGCATAGCTGAAGGTGTTTGAAACGGCTATGTCTCATCCGGCCAACTTAAGCCTT	TTTTGATTGTTGCTCAGAAAGCC	CTTTCGGGCAATAATCATTTCC	mir-31	dme-mir-31
tca-mir-315	known	ChLGX	869524	869602	GTTCCTTTTGCTTTTGATTGTTGCTCAGAAAGCCGGGTGTTAGAAAGGCTTTCGGGCAATAATCATTTCCAAAGAGGAC	TGTCTTTTTCCGCTTTGCTG	CCAGCAGAGAGGATGAGGCTAG	mir-315	dme-mir-315
tca-mir-316	known	ChLG3	1000551	1000639	GCCACACTTGTGAACGTGTCTTTTTCCGCTTTGCTGCCGCTGTTCTGTCGTCGCCAGCAGAGAGGATGAGGCTAGTGCACGAGTTGACC	TGGGGACCACCCTGTGTTTACT	TGAACACAGCTGGTGGTATCTCAGT	mir-316	dme-mir-316
tca-mir-317	known	ChLG7	13750590	13750666	GGCGGTGCTGGGGACCACCCTGTGTTTACTCTGTATTTCGACCAGTGAACACAGCTGGTGGTATCTCAGTTTCTTCC	GTGCATTGTAGTTGCATTGCA	CAGTGTCTCTCCAGTGCAACT	mir-317	dme-mir-317
tca-mir-33	known	ChLG4	8178499	8178600	AGAAGATGAATATTATGATCTTAGGTGCATTGTAGTTGCATTGCATGTTATTCAAAGTGCAGTGTCTCTCCAGTGCAACTTAGCGCATAATTTCACACCTCT	TGGCAGTGTGGTTAGCTGGTTGTG	CGACCACTATCCATACTCCCTCC	mir-33	dme-mir-33
tca-mir-34	known	ChLG7	13763505	13763583	ATGTACACGGTGGCAGTGTGGTTAGCTGGTTGTGTTTTTTTGATCACGACCACTATCCATACTCCCTCCATGAATATCG	TAATCTCATTTGGTAACTGTGA	TCAGACTACTGAATGGGATCGA	mir-34	dme-mir-34
tca-mir-3477	known	ChLG3	19663710	19663810	TGCACGCTTGACTGCGTTTCGTTAATCTCATTTGGTAACTGTGAGGTTTGTTTATTCCTCAGACTACTGAATGGGATCGACAAAATGTGGTTTTGTTTTCA	ACTTGAGCCTTGCGAATAATTC	TTTGTTCGTGTGGCTCGAGTTA	mir-3477	-
tca-mir-375	known	ChLG8	12770476	12770549	TCAAACTGACTTGAGCCTTGCGAATAATTCCTAATTTAAAGAGCGATTTGTTCGTGTGGCTCGAGTTAGATAAA	CGGTGGTTTTATTACGGTGGTT	TCACCGGGTAGAAATCATCTCA	mir-375	dme-mir-375
tca-mir-3791	known	ChLG5	7175867	7175951	ATCAAGTTAAACGTTCGGTGGTTTTATTACGGTGGTTGCGATTTTTACAATCACCGGGTAGAAATCATCTCATGTTTAACCAAAT	no reads	TAATGTCCACCATTGTA	mir-3791	-
tca-mir-3802	known	ChLG10	7113026	7113144	CACTTGATGTAACTTTATACAAAAATCAACAAAAGTATGGCTTGCTTGAATGACGAGATAAAATCGTTATATCGTAGTCGCCATCTGTCGCTACAATGTTTTGTTTCATATATTTTTTA	TGGCACACATCAATGTCCACGTTTTTGTGAC	no reads	mir-3802	-
tca-mir-3803	known	ChLG10	1683028	1683112	CACACGAGGGAATATTAAAAATGGAGGTACATAACGTTCTGTTGCGCCAATAATGTCCACCATTGTAACTGGTGTCCCTCTTCCA	CTCGGGTTATCAGCTCATTGCACACAA	TACGTCACTGGAATGTTCCATAAGTGTGC	mir-3803	-
tca-mir-3804a	known	ChLG10	5147561	5147639	ATATTTTTTGGCACACATCAATGTCCACGTTTTTGTGACTTGATTCGCTGAAATGTTCCATAAGTGTGCTAGAACAACC	AGTCCGATCACATGTGGGTCGTA	TATATGTCTCGCATCTGACGGT	mir-3804	-
tca-mir-3804b	known	ChLG10	5151402	5151502	CTCGGGTTATCAGCTCATTGCACACAACAATGTCCACATTCTTGCGATTTCATACGTCACTGGAATGTTCCATAAGTGTGCGAAATCAGCGGTAGCAAAAG	no reads	TATGATTCGTCTGTGATGGTCT	mir-3804	-
tca-mir-3805a	known	ChLGX	5783347	5783442	TTTTGTCCAAGCTCAAGTCCGATCACATGTGGGTCGTATATTTTCAATATTATCATAATATATGTCTCGCATCTGACGGTCTTGGGGTGGGTTGTT	TTCTGTTCCCGGATTGTCACATAT	ATGTGCATCCGGGAGTAGATCT	mir-3805	-
tca-mir-3805b	known	ChLGX	5783977	5784080	AAGAAGATTTGCGCCTATTCCCAGGTCCGTTCACATTCGGATTTTATTGTGAATATTAAATATGATTCGTCTGTGATGGTCTTGTGGGTCGGTCCGATCAACAA	no reads	TTGCCGAACATCCTCGCCACT	mir-3805	-
tca-mir-3806a	known	ChLGX	5783512	5783657	AACAAAAAGTTTTATTTTTCAGAGCATTTCAACCAATTTCCTGTTTCTGTTCCCGGATTGTCACATATTTTTTAAATATTAAATATGTGCATCCGGGAGTAGATCTAGGGGGTTGGTACAATCAACGGCTTCGTATTTGATTTTAT	TCTCATATTCGCACTTGACATA	TATGTACACGTGTGGATATGG	mir-3806	-
tca-mir-3807	known	ChLGX	5788508	5788606	ATTAATAATTAATTCGGGCGATGGCGATGATGTGCGGCCAAATCGAAATTCTGAAATCATTTGCCGAACATCCTCGCCACTATCCAGTTAATTACAAGC	ATCATAACTTGCTCGCTGATG	no reads	mir-3807	-
tca-mir-3808	known	ChLGX	5786212	5786323	TTTAAGAGGGTTTTAACCAATTTTTCAGTCTCATATTCGCACTTGACATATTTTGGATTAAATAAAATATGTACACGTGTGGATATGGGGCCGAAGTTGGTACAGTCAACGG	TGTAGTTTACACGAATTTGGTCCT	ATCATTCGTGGGTAATCTACA	mir-3808	-
tca-mir-3809	known	ChLGX	5796225	5796317	TCATTAATGTTTGGCGGAAATCATAACTTGCTCGCTGATGTAATTTTAACAGACGTCGGTCAGTTGGTTATGAATTCTGATAAATGTTTGCTC	TTCTTGCTCAGGGTTTACATGTT	no reads	mir-3809	-
tca-mir-3810	known	ChLGX	5790589	5790690	AAATAGAAGATAATGTCCGATTTGTAGTTTACACGAATTTGGTCCTTTTTTTTAATAGGATCATTCGTGGGTAATCTACACATCGTGCATTTTTGTCACGTC	TTCTTGCTCAGGGTTTACATGTT	no reads	mir-3810	-
tca-mir-3811a	known	ChLGX	5785640	5785736	TTTATCCAATTCTCAGGATTCTTGCTCAGAGTTTACATATTTTGGTTTAAATATGAAATATGTACAACCGTGAGTGGAGACCTGGGGGTTGGTCAGT	TTCTTCTCAGGGTTTACATGTTT	no reads	mir-3811	-
tca-mir-3811b	known	ChLGX	5785317	5785402	TTTATCCAATTCTCAGGATTCTTGCTCAGGGTTTACTAAATATGAAATATGTACAACCGTGAGTGGAGACCTGAGGGTTGGTCAGT	TTCTTACTTGCGGTGTACATGTT	no reads	mir-3812	-
tca-mir-3811c-1	known	ChLGX	5784649	5784745	TTTATCCAATTCTCAGGATTCTTGCTCAGGGTTTACATGTTTTGGTTTAAATATGAAATATGTACAACCGTGAGTGGAGACCTGGAGGTTGGTCAGT	TAAGTGATTTTGATGACACTAT	ACTGGCACATCATCACTTAGC	mir-3813	-
tca-mir-3811c-2	known	ChLGX	5784984	5785080	TTTATCCAATTCTCAGGATTCTTGCTCAGGGTTTACATGTTTTGGTTTAAATATGAAATATGTACAACCGTGAGTGGAGACCTGGAGGTTGGTCAGT	TTTATTCTGCTCTTTTCGACG	AACGTCGAAGGAGTCAGGATAAA	mir-3814	-
tca-mir-3811d	known	ChLGX	5784317	5784420	AAGTTTTATCCAATTCTCAGGATTCTTCTCAGGGTTTACATGTTTTGGTCTAAATATGAAATATGTACAACCGTGAGTGGAGACCTGGGGGTTGGTTAGTCAAC	TACAATTTAGCGCTCTATTCT	TAGCATGAGCGTTTGTTGTAGA	mir-3815	-
tca-mir-3811e	known	ChLGX	5783739	5783850	ATACGGTTTTAACTAATTCTCAGGATTCTTACTTGCGGTGTACATGTTTTGGTATGAATAGTAAATATGTACAACCGTGAGTGGAGACTGGGGGTTGGTTAGTCAACAGCTT	TGGGGGTAGGATGCTCAAATGT	TTATGAGTCCTTCTAACCTCA	mir-3816	-
tca-mir-3812	known	ChLGX	5787259	5787378	TTTTTTAGGATTGTGAGCTGAGGCTCGTTTTAAGTGATTTTGATGACACTATTGGTTATGAACAATACTGGCACATCATCACTTAGCATGAGCTTTAGATTTTCGTCAAGTTCTACCAAA	ACAAGGCATGTTTGGCAGCAAT	TTGCTGCCATTCATACCTTACA	mir-3812	-
tca-mir-3813	known	ChLGX	5794687	5794779	TTTAAGTGTTGCAAATTTTTATTCTGCTCTTTTCGACGTTTTAAAATTTGAAAAACGTCGAAGGAGTCAGGATAAAAATTTTTGACACAAATC	no reads	TAATATTGCTCACTACACCT	mir-3813	-
tca-mir-3814	known	ChLGX	5794132	5794223	TTCTCTTTGTTGAAAGTTTACAATTTAGCGCTCTATTCTAGTTAAATTTTACACTAGCATGAGCGTTTGTTGTAGATTTTTGGCAAAAATTT	TTCCTTTCGTTCCAATGATGCT	no reads	mir-3814	-
tca-mir-3815	known	ChLGX	5788162	5788256	GAAAAAATTATTTGCGATTGGGGGTAGGATGCTCAAATGTTTGTGTTTAATTAAACTTATGAGTCCTTCTAACCTCAGTTGTAAATAATTGCTAT	CTTGCCAAGCCGTTACAGCATT	no reads	mir-3815	-
tca-mir-3816	known	ChLGX	5787077	5787248	GATAGTGCAGATTTAGAATTGTATTTTAGTTGAGCTGGGCAAATTTATTGTGGCCGGTTACAAGGCATGTTTGGCAGCAATTAGCTTTTGTAATATTGCTGCCATTCATACCTTACAATTGGTCTCAGTGTTTCCAACACCGATAAACCTTAATCACTTTTTTAGAATTGTA	no reads	TTTCTAGTGAGTGAGGATGTTAA	mir-3816	-
tca-mir-3817	known	ChLGX	5786631	5786746	TCCAAGGTTGCTGCGAGATAACTGGGGCCAGTTTCGGGGTGTGGGAGTGGTATTATTTTTTTAAAGTAATATTGCTCACTACACCTCCAAATTGGTCTTGGTACTTCAACCGACTA	no reads	ATATTTTCTGTGTGAACCTCGGA	mir-3817	-
tca-mir-3818	known	ChLGX	5795452	5795544	AGAAATGTGCTGCAAATTTTCCTTTCGTTCCAATGATGCTTTAAATTTGAGGAACATCTGCGGAGCTAAAGCGAAACTTTTTGGCACAAATAT	TGTAAAATTGGTTCGACTATTT	ATGGTTGAGTCAGTTTTGCACC	mir-3818	-
tca-mir-3819	known	ChLG4	9708729	9708839	AGCTAGGAAGCTAACAGGTAATTCGTATTAATATTCCATTTAGTTCTGGAGCAAGGCTCTATTCTTATGTAAAATTATTATTTGTTTTTGATGTAAAAATGCTTCCACTAA	TGTTTTCTTCTTCTGCACTATTT	ACCGTGCGGAGAAGACAACAAG	mir-3819	-
tca-mir-3820	known	ChLGX	5794461	5794553	AAAAATTGTGTGCAATTTCTTGCCAAGCCGTTACAGCATTTTATATTTAAGAAATCCTGTACAGGTTTTGCAATAAAATTGTGCACGAACATT	CGAGGCGTGGTGGGCGGT	CTATCCCCGACTACGCCTCGGA	mir-3820	-
tca-mir-3821	known	ChLGX	5795772	5795863	ATGTATGTGTTGCAATTTAGCATCCTCCTCTTAGGAATTTTATATTTGAGAAATTTCTAGTGAGTGAGGATGTTAATTTTTGGCACAAATCA	TTCTCACTGCGCTGCTGCGGATGCCGCAAG	TCCGATTTTCATTTGTAGTTGCTTTGAAAT	mir-3821	-
tca-mir-3822	known	ChLGX	5787677	5787839	AAAATATAATATTTTATTTTAGAACTGACAATAGCTGTAGTTCGTTTCGAGGTGTTGCACAGTTAATATTGTACCTTAAAGCAATATTTTCTGTGTGAACCTCGGATTGGACTTTGGATTTTCAACTTTTGTCCTGGATTTACGATTAAAAATATTGTTGATA	TCTGAAGTGCAGGATAGTTATTT	ATAGCTAGCCTCGTACTCGGAAT	mir-3822	-
tca-mir-3823	known	ChLGX	5781595	5781685	AATTTTGTGTCTTGTTTAAAGGTCGTGGTTTTGGCATTTTGCTGTTGAAATCAGTATATCAGACTACGGTCTTTGGATGAGGCTCATTTTT	CAGAGTTCCTCGATGCCGTTTC	no reads	mir-3823	-
tca-mir-3824	known	ChLGX	5781786	5781882	ATGGACAAAGACTGATACGCGGTGTAAAATTGGTTCGACTATTTGTGAACTAAATAAATGGTTGAGTCAGTTTTGCACCGTATATCAGTTAATGACA	no reads	TACGACACAACAAAATTGCAAT	mir-3824	-
tca-mir-3825	known	ChLGX	5796077	5796171	AAAATGTTTTGGTGAAGATTTGTTTTCTTCTTCTGCACTATTTTATACTTAAAAAACCGTGCGGAGAAGACAACAAGTCTTTAACAAAATTCTTC	GGGCGAAATGATTCTGGTGTG	CACCAAAATCGTTTCTCCTGTTT	mir-3825	-
tca-mir-3826	known	ChLGX	5786920	5787032	AGGGTTGTGATGTAACTGGGGCCGGTTTCGAGGCGTGGTGGGCGGTAATATTAGTAAAAATAATACTATCCCCGACTACGCCTCGGAATTGGTTTTGGTGTTTTCACACAAAC	CGGCAAGTCACAGCAGGCTGT	GCTTGCAAGAGAAAATTGAACTGT	mir-3826	-
tca-mir-3827	known	ChLGX	3987712	3987786	GCTTCTCACTGCGCTGCTGCGGATGCCGCAAGATAAAAAATCTTCCGATTTTCATTTGTAGTTGCTTTGAAATTT	no reads	CTCTCTGGTAGAAAGTACGTCATTCACC	mir-3827	-
tca-mir-3828	known	ChLGX	5786420	5786520	TCTCTGCGAGAACTGAAACTCGGTTCTGAAGTGCAGGATAGTTATTTTTAAATAAAGAAAATAGCTAGCCTCGTACTCGGAATCGAAGATCAGTTAGTGCA	TGCCACTGATGAATTACTGCTAGAATCT	GAGGATTCGCAGTTTCTGAGGCA	mir-3828	-
tca-mir-3829	known	ChLGX	5788970	5789059	GTTCAATCAGCAGCATACAGAGTTCCTCGATGCCGTTTCTTCGAGTGGATTGACTTGGTTTCAAGGAACCCTAAATGCTGCTGGTGATTA	AGGTCTACCTCTGCTTAAGTTAAT	TCACTGGGCAAGGTAGACTTT	mir-3829	-
tca-mir-3830	known	ChLGX	3595260	3595338	GAAGCGTGGTGCTCGGTGCGGCACCGGCATTATGGTGGAAGACAAATATTTGGCCTCGGTCGCGTTGGGAGCCGCCATT	AGGTCCACCTCTGCTTAAGTTGATA	TCACTGGGCAAGGTAGACTCT	mir-3830	-
tca-mir-3831	known	ChLGX	6901709	6901799	GTGAGCTTTTCCAAACATTGCTATTTTGTCGCTCGATGTCCGCTCCAGTCGTGATACGACACAACAAAATTGCAATGTTTGAAAAGTCATT	GTTTAGCCTAAGTCGTCTTAATAAAATGT	TTTGAGTCCGATCCTGTCTACCTGCCG	mir-3831	-
tca-mir-3832	known	ChLGX	2759903	2760003	TTAGATTAACTGGAGTAAAACGGGCGAAATGATTCTGGTGTGTAGTTTTGTCCTATTTCATACACCAAAATCGTTTCTCCTGTTTATTTCAGTTAAGCACG	CACAGGAAATTGCGATATGTT	no reads	mir-3832	-
tca-mir-3833	known	ChLG2	3458975	3459064	TTTTGTTAGTTTTAACGGCAAGTCACAGCAGGCTGTTATGGAAATCACAGTAACAGCCTTCCTGAAGCTTGCAAGAGAAAATTGAACTGT	AGGGGGTACTGTAAGTACGTACG	TAGTACGAACGGTACTCACT	mir-3833	-
tca-mir-3834	known	ChLG2	1971892	1971955	GGATGGAATGATGTTATTTTCGACCTCCACCACCCTCTCTGGTAGAAAGTACGTCATTCACCTC	CGTGCGATCTTTCCATTCCTACT	TAGTACGGAATTATCTCACATT	mir-3834	-
tca-mir-3835	known	ChLG2	2187947	2188034	TAAAATCTTGTTGCCACTGATGAATTACTGCTAGAATCTTCCTTTAATTTAAGTTGAGGATTCGCAGTTTCTGAGGCAAATTAGAAAA	AGGAGGAAAAACGAGTCGGTCG	GAACGCTTCGTTTTTATCCTTG	mir-3835	-
tca-mir-3836a	known	ChLG2	1365524	1365614	TTTTTGAAATGTCTGTCAGGTCTACCTCTGCTTAAGTTAATATTTATTTAATTATCACTGGGCAAGGTAGACTTTACAGCCGTTTCTTCAA	AGTTGTTGATGTGGCTTTAGTG	TTAAAGCTATGTCAGCAATTAA	mir-3836	-
tca-mir-3836b	known	ChLG2	2692194	2692284	TTTTTGAAATGTCTGCCAGGTCCACCTCTGCTTAAGTTGATATTTATTTAATTATCACTGGGCAAGGTAGACTCTACAGCCGTTTCTTCAA	TGACATTTTAACCATAGTGCTGT	AGCATTGTGTTGGAAATGTCGTC	mir-3836	-
tca-mir-3837	known	ChLG2	2554348	2554456	AAAAACATTTGTCTAATAAATAAATCTTGAGACGTTTTTTTAAACTTGTTAAGACATTATGAGCGAGAGTGAGATATTGTCGGAAGATTGTTTTTATGAAAGTGAACAG	no reads	TGTTCGAGACTAATGTTGGTTT	mir-3837	-
tca-mir-3838	known	ChLG3	15062154	15062294	ACAGAGATATTCGCGCAAAGTTAGAGGTTTAGCCTAAGTCGTCTTAATAAAATGTTTTTAATAATTGAGAAAATTTTAAATGTTCTAACATTTTGAGTCCGATCCTGTCTACCTGCCGCTTTGTGATGAAGGCTTCAAAAT	AGTTGATTTGGAGTAGTACTATG	TAGTACATTCCGAATCGACTCG	mir-3838	-
tca-mir-3839	known	ChLG3	5757862	5757963	ATAATGAGCGAGATAGTAGTTTTGTCACAGGAAATTGCGATATGTTCGAATATTTTATGAACTTGTTGCCGTTTCCTACGTGCAAAATTCGAATCAATGCTT	AGTTGATTTGGAGTAGTACTATG	TAGTACATTCCGAATCGACTCG	mir-3839	-
tca-mir-3840	known	ChLG3	15203983	15204073	CATCAGTGAATGCTTTGTAGGGGGTACTGTAAGTACGTACGATTTTTTTAACGTAGTACGAACGGTACTCACTATGAACGTTACACAGTTT	AGTTGATTTGGAGTAGTACTATG	TAGTACGTTCCGAATCAACTCG	mir-3840	-
tca-mir-3841	known	ChLG3	15203860	15203954	CTCTTTTCGCATTATCTTTCGTGCGATCTTTCCATTCCTACTTGTTGTTTGATAAGTAGTACGGAATTATCTCACATTAGATATTGGGAGTTTTC	AGTTGATTTGGAGTCGTACTATG	TAGTACGTTCCGAATCGACTCG	mir-3841	-
tca-mir-3842	known	ChLG3	560957	561052	TCCCACAACCTAACAACAAGGAGGAAAAACGAGTCGGTCGGCATGGCACTGATGCGAACGCTTCGTTTTTATCCTTGTTGTTTTATCGTTGAAAAT	TAGTACGTTCCGAATCGACTCG	AGTGGACATGGGGTGGTACTGTG	mir-3842	-
tca-mir-3843	known	ChLG3	15204456	15204547	TGTGGCTGACAAGTTTTCAGTTGTTGATGTGGCTTTAGTGGAGATTTTACTGAATTAAAGCTATGTCAGCAATTAAAAAAATGTCGGGTCTT	GGCGCCGCGTTGATTTGGAGTCGTACTA	TAGTACGTTCCGAATCGACTAG	mir-3843	-
tca-mir-3844	known	ChLG3	5628773	5628859	ATTTATGTTTTGAGAGGCACCTCAGAAAACCCCACGCACATGTTTGTACAAATTGTGTGTGATAAAATGAGGTGCCAGAGCAAATTG	GGCGCCGCGTTGATTTGGAGTCGTACGA	TAGTACGTTCCGAATCGACTCG	mir-3844	-
tca-mir-3845	known	ChLG3	16474394	16474540	CGAAATGGTGATTTATGTAATAAAGTTGGTGGTCAATGTCCCACGCCTTGGAGTTATCTTGGCCGGATTAAGTCGAATGCTGTGTACGCCATGGTGGAAATAAGTGTTGGGACCCACGCAACGTCCATAGATGGGTCAATCAGTTAT	no reads	GTTTTTTTCAAAATATGCTCAT	mir-3845	-
tca-mir-3846	known	ChLG3	15911874	15912004	GGAATAGAGTTACTTCCATTGATGATAGTAAATGTTCTTGGCTTATAAGTCTTTGTGTCAAGAATATTGACCACAATTACGTTGCCTCAATCATCGACGTCATCAACTGACATGGCAACTAATTCTCCAAT	ACCACAATCCCAGCTCCACATTATTGCATT	TAGTGGCGTTTAGTATTGTGGAAA	mir-3846	-
tca-mir-3847	known	ChLG3	1617960	1618056	GAAGTGCTGTTTAAATTCGAACTTTTTATTTAATTTGGCAATGTGTGCGAGTTACACGTCTCGAATTTCGATCAGGTTCGATTTTAACCGGCTTAAA	TTCGTCAGATTTGTTAAAGGTTTCGC	TAACGCGTAATTTTTGGCAAAGTGACG	mir-3847	-
tca-mir-3848	known	ChLG3	6918155	6918239	TATTATCCGCTCTATGTAGCGGTATATAAGGTTAGCGCGCTGACCGCGTGTTACCCACTTAATGTGCTTACATTGGAAGGAAATT	CGAGAAATTGGGCTGTGGTGTGCCTT	no reads	mir-3848	-
tca-mir-3849	known	ChLG5	5383152	5383248	GTAACTGTTCGAAATGCTGACATTTTAACCATAGTGCTGTTGTTTATATTCAAATTAATAGCATTGTGTTGGAAATGTCGTCTTTTCGAACAAACTA	AGTGAAGCGAAGTTTTTTCATT	TGAAACTCTCTTGCTTCTCTAA	mir-3849	-
tca-mir-3850	known	ChLG5	14293865	14294020	GTAATTGCATTTGATAGATTAGGCCGATATTAGTCTAAACAAGGTTGAGACTATTCTATAAATTATTACAAAATCGCTAATAAGGTATAAGGCAGTAAAATGTTCGAGACTAATGTTGGTTTCATTTTACTCGAAAATACTTTTTTTTGCATAAAA	CACCCCACACATTTAAGC	TAAAATGAAGAGGTGTGCTCGTTGTGGG	mir-3850	-
tca-mir-3851a-1	known	ChLG5	235959	236066	CGGACGAATTATGAATTTGGCGCCGAGTTGATTTGGAGTAGTACTATGGTTTTGGGTACTCACATAGTACATTCCGAATCGACTCGTTAACAAATTTAAATTCAACAA	TAGCACTGGACGATCTAAACATGTCT	no reads	mir-3851	-
tca-mir-3851a-2	known	ChLG5	208878	208985	CGGACGAATTATGAATTTGGCGCTGAGTTGATTTGGAGTAGTACTATGGTTTTGGGTACTCACATAGTACATTCCGAATCGACTCGTTAACAAATTTAAATTCAACAA	ATGGAATTATTTGGTATCAA	no reads	mir-3851	-
tca-mir-3851b	known	ChLG5	235562	235669	CGGACGAATCATAAATTTGATTACAAGTTGATTTGGAGTAGTACTATGGTGTTTGGTACTCACATAGTACGTTCCGAATCAACTCGTTAACAAATTTAAATTCAACAA	TGGGCAAAAGTCCGCCTGAAC	GTTCAGGCGCTCTTTTGCATGA	mir-3851	-
tca-mir-3851c	known	ChLG6	8825723	8825833	CCGGACGAATCATGAATTTGGCGCCGAGTTGATTTGGAGTCGTACTATGGTTTTTGGTACGCACATAGTACGTTCCGAATCGACTCGTTAACAAATTTTAAATTCGACAAT	no reads	TGAAACCTCCTACTATGTCGCAG	mir-3851	-
tca-mir-3851d	known	ChLG6	8819498	8819669	ATACTGCTAATGGTTCCGGAGTCGTACTATGGTTTTTGATACTCACATAGTACGTTCCGAATCGACTCGTTAACAAATTTTAAATTCAACAATTAAACCAATTAAATTTAATATTGAGTGGACATGGGGTGGTACTGTGTAATTTTTGACCCATAGTACGGCCCATGTTGGC	AGGCAAGATCTTGAGCTGGTGT	no reads	mir-3851	-
tca-mir-3851e	known	ChLG6	8930351	8930445	TGTTTGAATTTGGCGCCGCGTTGATTTGGAGTCGTACTATGGTTTTTGGTACTCACATAGTACGTTCCGAATCGACTAGTTAACAAATTTTAAAT	TCGCACAGTTTGATCAATCGGTAACC	no reads	mir-3851	-
tca-mir-3851f	known	ChLG6	8929279	8929373	TGTTTGAATTTGGCGCCGCGTTGATTTGGAGTCGTACGATGGTTTTTGGTACTCACATAGTACGTTCCGAATCGACTCGTTAACAAATTTTAAAT	CCACAGTGGAAGCAGGGAACGGTATC	no reads	mir-3851	-
tca-mir-3852	known	ChLG5	14767953	14768046	CTCCATGACGTCACACTCTTAATACGGGGCCTTTAAGGAGTTCTGCGGCTTCTTCTGCGCCATAATTGTATTAATATCGCGGTGACGCAACGAC	no reads	CATTCGAGACCCCTGTTAGTTA	mir-3852	-
tca-mir-3853	known	ChLG5	5820881	5820995	TTTCATGAAAAAATATCCTTGTGCATCTTGTGTGTATTTTGTGAAATGCTATAGTTGAATATTTTAGTTTTTTTCAAAATATGCTCATAATGTGCAAGGGTGATTTGTTATCGGT	TGAAGTGATCTACAGCCAGAAATGCATT	no reads	mir-3853	-
tca-mir-3854	known	ChLG5	2503217	2503286	CGACACCACAATCCCAGCTCCACATTATTGCATTTCAAAAATAATAGTGGCGTTTAGTATTGTGGAAATT	ACCTTCCAAAAAAGCACTCGTTTGGTTAC	no reads	mir-3854	-
tca-mir-3855	known	ChLG6	8753198	8753269	AGTTTTTTTCGTCAGATTTGTTAAAGGTTTCGCAATTAACGCGTAATTTTTGGCAAAGTGACGGAAATATCC	TCATTGGGTCCAAGAAACGAAAGAATTC	TGCGACTTCCGTCGATGTTGTCCTGA	mir-3855	-
tca-mir-3856	known	ChLG6	2817630	2817712	GTGTGGTTTTTTTGCAAGAAAGTCATTTGAACACTTTCAATGTTTCGCAAACTGAGTGATTTTTCGTTGCGGAAATTCAAGTC	TCGAGTTTAAATTATGTTGAGTCTT	TGCTTTAGGGATCTTTAATTTCTCGGAT	mir-3856	-
tca-mir-3857	known	ChLG6	8180983	8181085	AGAACGAGAAATTGGGCTGTGGTGTGCCTTGATACTATCCCACGTGTTGCAGGATGGAACAGGTGTGGTGTCTCAATGCTCATCATGGCGCAATTTTCATATG	TTGACACATCGGTGTTCTACCATGCAGT	AAGAATCGCTAACACCGATGGCACTG	mir-3857	-
tca-mir-3858a-1	known	ChLG6	8929084	8929152	GTTTTTTAGTGAAGCGAAGTTTTTTCATTGGCCAATAAAAAATGAAACTCTCTTGCTTCTCTAATAAAT	TAAGAACCCTCGTTAGCGAGTTTGGCG	TTTAACAGCATCTTTGG	mir-3858	-
tca-mir-3859	known	ChLG7	11854759	11854827	CACACCCCACACATTTAAGCCGGCCGTTTCATGTCTTAAAATGAAGAGGTGTGCTCGTTGTGGGAACAT	ACTGAAGCTGACGAGTTAACTGCCGGGT	TCCCGGATTTTTTCCCCAGCCTCAAGAAG	mir-3859	-
tca-mir-3860	known	ChLG7	1491181	1491246	TAGTAGCACTGGACGATCTAAACATGTCTTCTTTAATGAAGTTGTGTAAAGGAAACAGTGCAAAAT	GACTTGTTCTCTCTGTATTGTG	TAGTACGGATTGAACACGTCGC	mir-3860	-
tca-mir-3861	known	ChLG8	4424522	4424629	GTTTAGTGTGTTTCGAAGGGTACTTAATGGAATTATTTGGTATCAATTGATTTTCGATTTAATTGGTACCATTTAATTCCATTTCGGAATTTTCGAAATGTTCATGTG	AACCCCTGGTGGAAAACCCATACAT	TTAATTCACATTGGGGGCATAAT	mir-3861	-
tca-mir-3862	known	ChLG9	13734517	13734606	TGCAAGGTTGCTCGAAATTGGGCAAAAGTCCGCCTGAACATTTTTCTAATTGTTCAGGCGCTCTTTTGCATGACTTTGGCCAACCACAAC	CCGATGTTACGACGGCTTTACATGA	ATAAAGCTGTCAGTAACGTGGAC	mir-3862	-
tca-mir-3863	known	ChLG9	13734623	13734715	TGCCAGGGTGTGAAGAATTGATCAAGTAGCGCCGCTTGGTCTTTGAATTGATTGATCAGCGTCGTTGCTTGATCCATTCTCTGCATCCACAAT	TTTACTTCACTCTCGCCTTCGCC	no reads	mir-3863	-
tca-mir-3864	known	ChLG9	8929305	8929383	AGTGATGTGGGGCGACATAGGCATGGTTTGAGTTTGTTTAATAAACTTGAAACCTCCTACTATGTCGCAGAATAATTAG	no reads	GCACCAAGGCAAGCAGCACTTCCAAA	mir-3864	-
tca-mir-3865	known	ChLG9	14430866	14430965	TCCAAAATTGTTTTTTAATAAATTAAGGCAAGATCTTGAGCTGGTGTGTGCCGTTTTAGCACACCAGTGTGGTTTCCTTGCCAGAAAAATAGAAATAATT	CAAAGACGTTAGAAACAGGACT	TTCTGTCTCTTTCGTTTTGC	mir-3865	-
tca-mir-3866	known	ChLG4	689556	689644	GTAATTTTTTTTTCGCACAGTTTGATCAATCGGTAACCTTGATGGCTACTCGGTTATAATCCTGTGCTAAATAATGGAAGAAAATGAGC	no reads	no reads	mir-3866	-
tca-mir-3867	known	ChLG3	1218119	1218210	TCCGCCCCTATAAGGACCACAGTGGAAGCAGGGAACGGTATCATTTCGATTACACCGTTCCCGTTATTTGCAGCGGGGCTTGTGGGGTACAG	AGACTGATCTTGTTTCTGCGGAAAT	TTCGGCGATGAGATCAGCCTGT	mir-3867	-
tca-mir-3868	known	ChLG3	20947488	20947594	GTAAACGGAATTAAAGTACCAGCACCAGTATGTATTTTGTATGCATTCTTTTTACAACAATTTATGCAACAAGAAATCAACTAAAGTTTAATTTTGATTCTGATGGT	AGAAGAACATGTGGTCGTGGTT	CACGCCCACAAGTCCTCCTACT	mir-3868	-
tca-mir-3869	known	ChLG5	14293317	14293388	TAATTACTGATAGATGGTCTCGAAAAGCCTTATAGCGATGTTGGGGGCATTCGAGACCCCTGTTAGTTACCT	no reads	TTCCAATTAGTCGGATGACACGGACAATT	mir-3869	-
tca-mir-3870	known	ChLG5	10064558	10064637	GCCAATTCGAGGCACAAGAGGAAAAAGAGCGCAAAATACACAACTTTGGCGGAGCTCGAGCCACAAGTGCCCGGAATATT	TAGGCAGCTAGTTTCAATGGAATTAAT	no reads	mir-3870	-
tca-mir-3871	known	ChLG7	2082059	2082135	ATCCCACAATCCCGATTTCTGCCTTGTGCCGCTCCCTCCTAATTCCCGCCACATTTGCCTAATCGGGCATGTCCCAC	TGGAAGACTAGTGATTTTGTTGTT	CAAGGAATCACTAATCATCCCA	mir-3871	-
tca-mir-3872	known	ChLG7	14554402	14554494	GTGAAGTGATCTACAGCCAGAAATGCATTATTATGCTCTGCGAAGTAAGTGCATATCTTAATTTTTGCATTTTTTACTAATTGTTCATGCTCA	TGAAAGACATGGGTAGTGAGATG	TCTCACTACCTTGTCTTTCATG	mir-3872	-
tca-mir-3873	known	ChLG7	4215103	4215225	TTATTAGTTGTTGCCGAATGTTATAAGGTTTGCATTCGTTAGGAATATATTAATTGTTAAAACGAAAATCCAAATAAATTGTTCTTGAATGTAATTTTAGCTCATAATTGTAATAATTTAACC	GGGTGGAAGGTTGGATCTTCGCA	CCAGATCTAACTCTTCCATATGA	mir-3873	-
tca-mir-3874	known	ChLG8	3432758	3432899	AGCAAGTGGCAGATTGGCTGATGGATGCTGTCATAATAAGGGACTCGACACTGGTTCAGATAAGAGCAAACACACGCAAAACTTATCGTGGGATAAATCGCCTCATTGACGACTTATCCGAAGCGGATCGATTGCACACACA	GGGCTTGAAATCTTGCTCTCCC	GTGAGCAAAGTTTCAGGTGTGT	mir-3874	-
tca-mir-3875	known	ChLG8	7779290	7779363	CACTTGCGTCTTTAGCTCAATAAATATTAGAGGTGCTTTATTTGGGCCAATATTTGCGCTAGATAGCGCGTATT	ACGCTTGAACTTTGTTTTTCCT	GTGAGCAAAGATTCAGGTGTGT	mir-3875	-
tca-mir-3876	known	ChLG9	5394066	5394126	TTTCGTTTTATTTTACCACTTACTACCAAGTTGACTAGACCAGTGGTAAAATGAGAAAAAA	TTTAGAATTCCTACGCTTTACC	CAAAGCGTTTGGATTCTGAAT	mir-3876	-
tca-mir-3877	known	ChLG9	10960147	10960214	GTCAACCTTCCAAAAAAGCACTCGTTTGGTTACTAAATAACCAAGTGAGTTGTCACTGGAAGGAGAGA	TTTAGAATCTGTACGCTTTGTTG	ACAGAGCTTACGGATTCTCGAA	mir-3877	-
tca-mir-3878	known	ChLG4	7036532	7036620	TGATAGGTGTGGTGGACGGAGAACTAATTGTATTAAAATTGCTACCTACTTGCTTCGATTTGAAATTTTTAGTGTCCGTGTTGTTATCA	AAATTGACTCTAGTAGGGAGT	CTCCCTAACGGAGTCAGGTTG	mir-3878	-
tca-mir-3879	known	ChLG4	4106596	4106664	CAATTGGGTTATTGTGTGCCGGTCATTACATCATTACAGGTCATGTAAACCGGCCATAAAGCCCTCAAC	AGTCCGTGATGCGTGACAATATT	TATTGCACTAGTCCCGGCCTAT	mir-3879	-
tca-mir-3880	known	Unmapped36	42421	42524	CTTCATTGGGTCCAAGAAACGAAAGAATTCGGCGATTTTTGTCCTCTGAGTCTTAGGTTCCGGGAATTGAGATTGCGACTTCCGTCGATGTTGTCCTGAAATAC	AGGTCGTGTCTTGTGCAACTTG	AATTGCACTTGTCCCGGCCTGC	mir-3880	-
tca-mir-3881	known	ChLG10	1879159	1879245	ACGCAGACTCTTCGAGTTTAAATTATGTTGAGTCTTTCCGATAGCGATCTTTGCTTTAGGGATCTTTAATTTCTCGGATGTCTTTTC	GGGTCGTGATTTGTGCAAATATG	TATTGCACCAGTCCCGGCCTGA	mir-3881	-
tca-mir-3882	known	Unmapped29	14499	14583	TCTCCGCACTTGACACATCGGTGTTCTACCATGCAGTTCCTCTGTGCGTGGAAGAATCGCTAACACCGATGGCACTGAGCTGTTT	TCAATTCCGTAGTGCATTGCAGT	TGCAAGCAGTGCGGAAGTGAGG	mir-3882	-
tca-mir-3883	known	Unmapped228	8917	8987	TTCTCCCATAAGAACCCTCGTTAGCGAGTTTGGCGAAGCTCCAAACCTCTTTAACAGCATCTTTGGTGGAT	GGTGGAAAGTTGTACCGCTGATG	TAAGCGTATAGCTTTTCCCCTT	mir-3883	-
tca-mir-3884	known	Unmapped1515	1844	1909	AAAACTGAAGCTGACGAGTTAACTGCCGGGTACTTGTTCCCGGATTTTTTCCCCAGCCTCAAGAAG	AGCTCAGCGTGTGTCGTACTGATA	TCATAAGACACACGCGGCTAT	mir-3884	-
tca-mir-3885	known	ChLG10	6483987	6484078	AACAACGAAGGCGGCGGCGGCGGCCGATGCGCTTTTTTTTCACTGTTAATGAATGGCAAGTGTGCGGGTTTTGTTTTTACGTTTTCGGGTAA	GGGCTCGTCATGGGGTAGCTAGC	CAGCTGCCTTTTGAAGGGCTA	mir-3885	-
tca-mir-3886	known	ChLGX	3178840	3178923	TACAACTCACAGCGAGCTTTGACAGGTGATGAGGGTGGTGAGGATGGCGATTATTATCGGTTATATATCAGTGGTAGGGAGCGG	CGGGTTTCGGGGCATCGGAACC	TTCGTTGTCGACGAAACCTGCA	mir-3886	-
tca-mir-3887	known	ChLGX	5066716	5066797	GAGATGGGGTTGTCATAAAAACGCACCCCTTATTTAACAACGAATATAACCTTGTGGCGCCTTTTTATTCCAACTCCTAATG	CCGCCACTAGGTCGCATAACACG	TGTGATGTGACGTAGTGGTATGT	mir-3887	-
tca-mir-3888	known	ChLG2	11852628	11852748	GGAAAATTTCGCTGTGCTTTGAATGTCACGCCGATAAAAATAATTTTTGTATATTGAATAAATGAGATACGAAAAAATTCAATTTCCGCGTGACGTAGTTAAGGTTAGCGTGAAGTATCAC	TACCCTGTAGATCCGGGCTTTTG	GAAGCTCGTCTCTACAGGTATCT	mir-3888	-
tca-mir-3889	known	ChLG3	15203725	15203820	TGTAATAAACTCACAAAATGCGACTTGTTCTCTCTGTATTGTGTGGAGTTGCTCATAGTACGGATTGAACACGTCGCTGTTTTTGAGTTTACGCTT	AGCTGAATCTTGAGGTGCTTCCG	TAGCACCACATGATTCAGCTTA	mir-3889	-
tca-mir-3890	known	ChLG3	17788978	17789115	CACCCTGTAGTTATAACATGGGATCGAAAATATACTGAATTAGAGCAGCTGTATCTGCGGAACTTTAGTTACATTTTAGCCGGTTATGTACGGCTGCACTTTTAAAGTTATGTTGTCTTATGTTGGTTTTACACACAT	TACTGAATTTCATGTGGGCTGCT	TAGCACCATGGGATTCAGCTC	mir-3890	-
tca-mir-3891	known	ChLG3	3317398	3317489	TCGGAGATGCAGAGGTTAATGTGTCGTAAAACACTTACTGTAATAAAAGTTAATAAAATGTGTGTAGTGTAAATACCTCACCGCATCAACCA	CTTTGGTAATTTAGCGTTTGTGA	ATAAAGCTAGATTACCAAAGCA	mir-3891	-
tca-mir-3892	known	ChLG5	14781729	14781803	ATTTCGTTAACCCCTGGTGGAAAACCCATACATTTGTTTAAGTGTGGTTAATTCACATTGGGGGCATAATAATTC	TCTTTGGTTATCTAGCTGTATGA	ATAAAGCTAGGTTACCGGAGTTA	mir-3892	-
tca-mir-3893	known	ChLG5	7175554	7175633	GGTTTTATTTTTCCGATGTTACGACGGCTTTACATGAAATTTGAATCATAAAGCTGTCAGTAACGTGGACAAATATTACT	TCTTTGGTGATCTAGCCGTGTGA	ACGCGTCTAAGTCGCCAAGATT	mir-3893	-
tca-mir-3894	known	ChLG7	9418908	9418994	TGAAATTTGCGGTTTTAATTCCATAATGCAGACGATTTTTACGACGGCGGAACGTGAGCGGTTTATTGGAATTAATTGTAAACAAAA	TCTTTGGTGATCTAACTTATGA	ATAAAGCTAGATTCACCAAAGAA	mir-3894	-
tca-mir-3895	known	ChLG8	5754922	5755011	CGATTTATTGAGTTGATTACGATGGTATCGGTCTAGCTCTCGAAGTTCCGCTGTAATCGGAACCGGAACCGGAATCGCCTTGATAATAGT	TCTTTGGTGATCTAGTTGTATGA	ATAAAGCTGGTTCAGCAAAGCAG	mir-3895	-
tca-mir-3896	known	ChLG8	4771979	4772082	CCGATTTTGACATATCTCGAGTGAAATTCCAACGACGGGCTGGGTCTCCAACCGGAGCTAACAGACACTAGATTAGAACTGCAAACGGATAAGGTCAAATTTTT	ACGTATACTGAATGTATCCTGA	TCCGGTATACCTTCAGTATACGTAA	mir-3896	-
tca-mir-3897	known	ChLG4	554633	554714	CAAAAGTGTTTACTTCACTCTCGCCTTCGCCGGCATGGCGCTGATGGCCGCCGTGGTGGTGGGGGTGGGGGTGGCACGGCGC	TTACGTATACTGAAGGTATACCGGA	TCAGGATACATTCAGTATACGT	mir-3897	-
tca-mir-3898	known	ChLG2	4106423	4106521	GACCTTGCGATTGCTGTACCGGCTCATAGCATGTTTAATTATCTGCGCGCTATTGATGGAGAAGTTGTAATTATGAACCGGGATGTTACTTGCATGCAG	GCTGTACCGGCTCATAGCA	TATGAACCGGGATGTTACTT	mir-3898	-
tca-mir-3899	known	ChLG3	6703282	6703341	TATAACCCACTTCGAGAGCCCGCCTTGGGACAGACTTCGGCGACACTCGATAGGGATAAA	CTTCGAGAGCCCGCCTTGG	GGCGACACTCGATAGGGAT	mir-3899	-
tca-mir-3900	known	ChLG3	21492860	21492930	ATTTTGTCCCATTTTTCTGGGGGTGGCACCTCCTTGCGAAGGAGGTGTGATCGCTTTGAATGGCACTACTG	TGGGGGTGGCACCTCCTTG	AGGAGGTGTGATCGCTTTG	mir-3900	-
tca-mir-3901	known	ChLG9	12320608	12320737	CTTATGTGCTAAGCATTTTGATTTTATGAGTCAAAAATCTAATAAAACGATATTTGTAATAAATTGACTTCGTTATCTTTGTATTTTTTATTATTTTTTCATTTATATTTCAATTACGTTTTCACTAAAT	CATTTTGATTTTATGAGTC	CATTTATATTTCAATTACGT	mir-3901	-
tca-mir-3902	known	ChLG10	3146124	3146226	CCGTCATATAACCGTGGTTATATAACCGGCATATTACCATGGTTATATAACCAGCATATAACCATGGTTATATAATCGGCATATAACCATGGTTATATAACCG	ATATAACCGGCATATTAC	ATATAATCGGCATATAACC	mir-3902	-
tca-mir-3903	known	ChLGX	7082543	7082630	CTTCTATTTATTTATGTTGGGGAGTGAAGTGCCATTTTACTTTTAGTAAAACATATTACATACTATTCCAACCGTAATTAAGTCTAGA	no reads	ATATTACATACTATTCCAA	mir-3903	-
tca-mir-3904	known	ChLG3	21262666	21262786	ATAAAATCATTAGTTATCTTAAAAGATATTATTAATAAGTGCTGTAATCTATTTAAGCTCATTAATAGAAATGACTTATTTAAAAATAATGTTTTAATTTTTGGTGTGACTGTGATAAACA	AAGATATTATTAATAAGTG	CTTATTTAAAAATAATGTT	mir-3904	-
tca-mir-3905	known	ChLG9	11233573	11233696	TTATCGGGTTCTCAAACGGCGGAACTGGCGGGGAAGGGGGAGCCGCCTTGCCTTCGGCCGGGCCGCACCAAGGCAAGCAGCACTTCCAAACCCCGACCAGCGTGGCGAGTTACTCACCCCTCAA	GGAAGGGGGAGCCGCCTTG		mir-3905	-
tca-mir-6007	known	ChLGX	5790992	5791078	ATTGGTCTTATGGTACAAAGACGTTAGAAACAGGACTACGAAATTAATTATGGTTCTGTCTCTTTCGTTTTGCATCATGGGAACATA	CAAAGACGTTAGAAACAGG	GTTCTGTCTCTTTCGTTTTGCA	mir-6007	-
tca-mir-6008	known	ChLG2	11714883	11714978	GTATTTAGCTGGACTGCTGGTGTCATGTATTCGACTCTTTTCACCATGCCGTACCTCCTAGTCGCCCATTACCACGCTAGCGGAACGGTTGTTACT	GACTGCTGGTGTCATGTATT	ATTACCACGCTAGCGGAAC	mir-6008	-
tca-mir-6009	known	ChLG2	187135	187224	CGACAGTTGTTTGGCTTCGTTGGCTCAAATGTTGAGCGAGACCCTGACGCTCTTTGCGTGGGCGCTCGACGAGTCCAAGTGCGACAGGCG	CTCAAATGTTGAGCGAGAC	GTGGGCGCTCGACGAGTCC	mir-6009	-
tca-mir-6010	known	ChLG2	9062069	9062153	ATTTTTTGCAGTTTGTTTTTGTCGCCTTTTAGGCACTTGGCGTATTTTAACAAGTAGCTGTAAGGGTGCTCGACTTGTAAATCAA	GTTTGTTTTTGTCGCCTTTT	TAAGGGTGCTCGACTTGTA	mir-6010	-
tca-mir-6011	known	ChLG3	24880461	24880537	CGAGTCCTCGATGATGTAAGCGGAACCGTCCGGGTTGTAGACGATCTTGCCGGAGAACTGCTCCACGTCCGAGGTGT	CGATGATGTAAGCGGAACC	GAGAACTGCTCCACGTCCG	mir-6011	-
tca-mir-6012	known	ChLG3	6961931	6962103	CGATTGTGACTGGGTCACGTAGAGGAAGGAAAGACAATCTGGTGGTGTGCAGGGTGAACAGACTGATCTTGTTTCTGCGGAAATGTTAGTTACAGTCATTTCGGCGATGAGATCAGCCTGTCGAACCCAGCTCGAGTTCGTTCAACACTTTCTTCTCTAGTAATATGCAGCGC	CTGATCTTGTTTCTGCGGA	TTCGGCGATGAGATCAGCCTGTC	mir-6012	-
tca-mir-6013	known	ChLG4	11065727	11065794	GCTCAGGCGTCGTCCAAAGCGCTCCAGGAAGCGCAAGCCGAGGTGAAGCTGCTGACGACCGCCTTGCA	GGCGTCGTCCAAAGCGCTCC	GCTGCTGACGACCGCCTTG	mir-6013	-
tca-mir-6014	known	ChLG4	2771193	2771274	CATTAAATTGGGTCACTCTCTTGACGTATTCCAAATAAAGCATGATTTGGAATTTCCCGTGTTGAGTGGCATAAATTATTTG	ACTCTCTTGACGTATTCCA	AATTTCCCGTGTTGAGTGG	mir-6014	-
tca-mir-6015	known	ChLG4	10702478	10702569	CTTTTCGTCATTTAATAATCGCGATTGGCACACCTGCCGCTCCAATATTCAGAAATATAGGCAGATGCAGCGCCGGTTGTGGTGATGTGTGT	GGCACACCTGCCGCTCCAA	AGGCAGATGCAGCGCCGGT	mir-6015	-
tca-mir-6016	known	ChLG7	14528165	14528239	GGCGCAAGAGTAGAAGAACATGTGGTCGTGGTTATTCGGCAATGCCACGCCCACAAGTCCTCCTACTTTTACGAC	AGAAGAACATGTGGTCGTGGTTAT	CACGCCCACAAGTCCTCCT	mir-6016	-
tca-mir-6017	known	ChLG7	6907635	6907789	ATAAGAGTTTGTTGTTTCCACCCTGTCGTGTTCCTAATTGGTATGTTGTATTTTTTATTGGGCTGATTCGTGTTTACGATGAGTCTTCCTGTATCCAAGCCGAGTGCCTCTAATCAATTCCAATTAGTCGGATGACACGGACAATTTACTGGTCT	TTGGTATGTTGTATTTTTTA	GCCTCTAATCAATTCCAATT	mir-6017	-
tca-mir-6018	known	ChLG8	362657	362749	AAACAATGGTAGGCAGCTAGTTTCAATGGAATTAATAATTTTTTTAAAAAACAATAGAATTCAACTTGTGACTAGTCGACCCTACCATCTCCA	CTAGTTTCAATGGAATTAA	TAGAATTCAACTTGTGACTAG	mir-6018	-
tca-mir-7	known	ChLG7	1803460	1803537	TGGTGTTGTGTGGAAGACTAGTGATTTTGTTGTTCTAATTTTTACGTAACAAGGAATCACTAATCATCCCACAAAGCC	TGGAAGACTAGTGATTTTGTTGTTC	CAAGGAATCACTAATCATCCCAC	mir-7	dme-mir-7
tca-mir-71	known	ChLG3	562386	562464	GTCTCTTCTTGAAAGACATGGGTAGTGAGATGTTTAATTAATAAATTTTGTCTCACTACCTTGTCTTTCATGTAGCGAT	TGAAAGACATGGGTAGTGAGAT	TCTCACTACCTTGTCTTTCATG	mir-71	-
tca-mir-750	known	ChLG4	9316826	9316917	AGAAAGCAAAGGGCCCTTGGGTGGAAGGTTGGATCTTCGCATGATTCAAGTTGCCAGATCTAACTCTTCCATATGACGGTCATTTGCCAACA	GGGTGGAAGGTTGGATCTTCGCATG	CCAGATCTAACTCTTCCATATGACG	mir-750	-
tca-mir-87a	known	ChLG6	1651407	1651488	CAGTCGTTGACGGGCTTGAAATCTTGCTCTCCCGTGATTATTTCGTAAAGGGTGAGCAAAGTTTCAGGTGTGTCAAAGGCTT	GGGCTTGAAATCTTGCTCTCCC	GTGAGCAAAGTTTCAGGTGTG	mir-87	dme-mir-87
tca-mir-87b	known	ChLG6	1654265	1654362	CGGGGGATGCCTGCCGTCGACACGCTTGAACTTTGTTTTTCCTGTGCATTATTCTAGGTGAGCAAAGATTCAGGTGTGTTGACTAACTCTCTCATCAG	ACGCTTGAACTTTGTTTTTCCT	GTGAGCAAAGATTCAGGTGTGTTG	mir-87
tca-mir-927a	known	ChLG9	11531396	11531463	TTTCGGTTTAGAATTCCTACGCTTTACCGTGTGAAAGGCTGGCAAAGCGTTTGGATTCTGAATCGAAC	TTTAGAATTCCTACGCTTTA	CAAAGCGTTTGGATTCTGAATCG	mir-927	dme-mir-927
tca-mir-927b	known	ChLG9	11142398	11142493	CGCCCTTTGAGCCCTTCCGGTTTTAGAATCTGTACGCTTTGTTGTTACTTTAAAATCACAGAGCTTACGGATTCTCGAACTGGTGGAGTATTAAAC	TTTAGAATCTGTACGCTTTGT	TCACAGAGCTTACGGATTCTCG	mir-927
tca-mir-929	known	ChLG9	8045980	8046082	AGACGGCCATCTTAATCGGGGTCAAATTGACTCTAGTAGGGAGTCCGTTACTTTATAGCGACTCCCTAACGGAGTCAGGTTGACTCCCTTTGAGGGAAATCTA	AATTGACTCTAGTAGGGAGTC	CTCCCTAACGGAGTCAGGTTG	mir-929	dme-mir-929
tca-mir-92a	known	ChLG8	2516169	2516246	CGCTTTCAGTAGTCCGTGATGCGTGACAATATTTAGTTTTTTTCGAATATTGCACTAGTCCCGGCCTATTGAGGGCGC	AGTCCGTGATGCGTGACAATAT	ATTGCACTAGTCCCGGCCTA	mir-92/310	dme-mir-92a,b; dme-mir-310,311,312,313
tca-mir-92b	known	ChLG8	2516719	2516800	CTGTGTCGTTTAGGTCGTGTCTTGTGCAACTTGTGGTTTTTTCATTAGTCAAATTGCACTTGTCCCGGCCTGCAAGGCACAG	AGGTCGTGTCTTGTGCAACTTG	ATTGCACTTGTCCCGGCCTG	mir-92/310
tca-mir-92c	known	ChLG7	1764467	1764594	TTTACTTAACATTTTCGAGGATGGAACGGTCGGTTGGGTCGTGATTTGTGCAAATATGTTATTTCGTTCATATTGCACCAGTCCCGGCCTGACTGCTCTTCCAGGACCACGCCGGGGTGTTGGAGGGA	GGGTCGTGATTTGTGCAAA	TATTGCACCAGTCCCGGCCTGAC	mir-92/310
tca-mir-932	known	ChLG5	13611452	13611535	GGAGTGCGTGTCTTCAATTCCGTAGTGCATTGCAGTGTTTGTAGCAGCAGTCTGCAAGCAGTGCGGAAGTGAGGATTCGTCTCT	TCAATTCCGTAGTGCATTGCAGT	TGCAAGCAGTGCGGAAGTGAG	mir-932	dme-mir-932
tca-mir-965	known	ChLG5	8033620	8033723	GGCGCGCTCCGATTGGACCCTGGGGTGGAAAGTTGTACCGCTGATGGTGATTTTTCTACACATAAGCGTATAGCTTTTCCCCTTTGGTTCCAATCACGACGATC	GGTGGAAAGTTGTACCGCT	TAAGCGTATAGCTTTTCCCCTT	mir-965	dme-mir-965
tca-mir-970	known	ChLG2	10499950	10500040	AAACGATGCCGGCGGCAGCTCAGCGTGTGTCGTACTGATAGTGTTATCACTAGCTATCATAAGACACACGCGGCTATCGCCGGTCTCTCCT	AGCTCAGCGTGTGTCGTACTGATA	TCATAAGACACACGCGGCTAT	mir-970	dme-mir-970
tca-mir-980	known	Unmapped977	1409	1503	TTGACAACTGGGTGCCGCAGGGCTCGTCATGGGGTAGCTAGCGTGTGATTAACAGCCAGCTGCCTTTTGAAGGGCTATATGGCATTGGTTTTTTA	GGGCTCGTCATGGGGTAGC	CAGCTGCCTTTTGAAGGGCTAT	mir-980	dme-mir-980
tca-mir-981	known	ChLG4	3609924	3610019	TACAAGACTTATATCTCATAAGTTACGGGTTTCGGGGCATCGGAACCGATTTTAAGCTGGTTCGTTGTCGACGAAACCTGCAGACTATGGGACACA	NA	TTCGTTGTCGACGAAACCTGCA	mir-981	dme-mir-981
tca-mir-989	known	ChLG4	193393	193484	TTTTTGCTCCCAAGGTCCCGCCACTAGGTCGCATAACACGCATTGTCAACACCGTGTGATGTGACGTAGTGGTATGTCTAGGGGAGTTGCCT	CGCCACTAGGTCGCATAACAC	TGTGATGTGACGTAGTGG	mir-989	dme-mir-989
tca-mir-993	known	ChLG2	8141702	8141789	GGCACATCCGTGATCTACCCTGTAGATCCGGGCTTTTGTAGAATTTTTAGATCAGAAGCTCGTCTCTACAGGTATCTTACGGATGGAA	TACCCTGTAGATCCGGGCTT	GAAGCTCGTCTCTACAGGTATCT	mir-10/100/125/993	dme-mir-993
tca-mir-995	known	ChLG10	6078318	6078411	CTAATTTAGCAGAACTCTGAGCTGAATCTTGAGGTGCTTCCGTGGTTTGGGCTCGTAGCACCACATGATTCAGCTTACGTTTCCGCTAACTACC	AGCTGAATCTTGAGGTGCTTCC	TAGCACCACATGATTCAGCTTACG	mir-995	dme-mir-995
tca-mir-998	known	Unmapped45	71481	71576	GGGACGCTTTGCCACTACGTTGTACTGAATTTCATGTGGGCTGCTGTTTTGCGTAGCACCATGGGATTCAGCTCATCGTTTGGTTATCTGCTAACT	TACTGAATTTCATGTGGGC	TAGCACCATGGGATTCAGCTCA	mir-998	dme-mir-998
tca-mir-9b	known	ChLGX	3616636	3616716	TTGACGACCGTAAGTTTCTTTGTTTTTGGTTCCAACAGGTGGGGGCCGATTTTGTTACTTTGGTAATTTAGCGTTTGTGATTTTATTTGAGTCATAAAGCTAGATTACCAAAGCAATGCGGTTGGCATTGCGTCGTGGAGATTGGAGTTGGAATAAGAAGACGTTCATT	CTTTGGTAATTTAGCGTTTGT	ATAAAGCTAGATTACCAAAGCA	mir-9/4	dme-mir-9b
tca-mir-9a	known	Unmapped48	113100	113268	CTGATATTTTCTTTGGTTATCTAGCTGTATGAGTATTGTTTAATAACATCATAAAGCTAGGTTACCGGAGTTAAAACCAGT	TCTTTGGTTATCTAGCTGTAT	ATAAAGCTAGGTTACCGGAG	mir-9	dme-mir-9a,dme-mir-4
tca-mir-9c	known	ChLG3	15204096	15204202	TGATTTTGCTAACGCGTTATCACTTCTTTGGTGATCTAGCCGTGTGAATTATTTTTGAAATCACGCGTCTAAGTCGCCAAGATTTGATGATGTGTCTAACAACTGGA	TCTTTGGTGATCTAGCCGTGTG	ACGCGTCTAAGTCGCCAAGATTTG	mir-9
tca-mir-9d	known	ChLG5	7174040	7174132	AATACGTCTACTTTATATTTCTTTGGTGATCTAACTTATGATTAACTTTATAAGTCATAAAGCTAGATTCACCAAAGAAATATGTGGTTGGCA	CTTTGGTGATCTAACTTATGA	ATAAAGCTAGATTCACCAAAG	mir-9
tca-mir-9e	known	ChLG9	11062	11172	AACAGGTTGCAAGTCGGATATATTCTTCTTTGGTGATCTAGTTGTATGAGTGTTTTATATATCATAAAGCTGGTTCAGCAAAGCAGATTGCATTCGACTCTTCGACGAGCC	TCTTTGGTGATCTAGTTGTAT	ATAAAGCTGGTTCAGCAAAGCA	mir-9
tca-mir-iab-4	known	ChLG2	7614308	7614388	TTAAACCCCCTGTACGTATACTGAATGTATCCTGAGTGTTTTCTGTCCGGTATACCTTCAGTATACGTAACAGGAGGCCAC	ACGTATACTGAATGTATCCTGA	CGGTATACCTTCAGTATACGTAAC	mir-iab-4	dme-mir-iab-4
tca-mir-iab-8	known	ChLG2	7614302	7614395	TGAAATGTGGCCTCCTGTTACGTATACTGAAGGTATACCGGACAGAAAACACTCAGGATACATTCAGTATACGTACAGGGGGTTTAACATTCTG	TTACGTATACTGAAGGTATACCGGAC	AGGATACATTCAGTATACG	mir-iab-8	dme-mir-iab-8
tca-mir-3851m-1	both	ChLG10	7128891	7128996	TTTTTTGAGTAAATTTAGTACTGGGTTGGCACAGAGTAGTACTATGTAAAATTCTATTCTATAGTACGACCCATGTCGGCCCAGTAAGAGATTTCAATTCACCAGC	GGTTGGCACAGAGTAGTACTATG	TAGTACGACCCATGTCGGCCCA	mir-3851	-
tca-mir-11614	both	ChLGX	3078135	3078286	CAGTAGGTGATACAAGCCACTGTCTGAACGTTTAGCGTTGACTGTGTGGATGATCGTGTGGTAGCCGATGGAAGTAACGGTAGTGCGATCATCCGCTGTCAAAGCTTTACTACCAACAGTCCAAGTGGCTTCGGGACATGGTTCACCAATAA	TGTGTGGATGATCGTGTGGTAGCCGA	GGTAGTGCGATCATCCGCTGTC	-	-
tca-mir-11615	both	ChLGX	6868071	6868153	ACACTTACGACGATTCGTCCTTTTCGGACTCGGACTACTCCGGCGATGAGTCCGAGTCCGAATGGGGCGGACTGCGTATCGAA	CGTCCTTTTCGGACTCGGACT	GTCCGAGTCCGAATGGGGCGGA	-	-
tca-mir-3806b-1	both	ChLGX	5785511	5785608	CTCAGTAAATTTTCCTGTTTCTACGTACGGATTCGTACATATTTTTTGAACAATCAAAATATGTGTATTCGTGCGTAGCAATAGGGGGGTTTGGTGCA	TCTACGTACGGATTCGTA	TATGTGTATTCGTGCGTAGCAA	mir-3806	-
tca-mir-3806b-2	both	ChLGX	5785190	5785283	CAGTCAATTTTCCTGTTTCTACGTACGGATTCGTACATATTTTTTGAATAATCAAAATATGTGTATTCGTGCGTAGCAATAGGGGGGTTTGGTG	TCTACGTACGGATTCGTA	TATGTGTATTCGTGCGTAGCAA	mir-3806	-
tca-mir-3806b-3	both	ChLGX	5784819	5784992	TTGGTCAGTCAACAGCTTTGCTGTGTAGGTTGAGGAGCATCTCAGTCAATTTTCCTGTTTCTACGTACGGATTCGTACATATTTTTTGAACAATTAAAATATGTGTATTCGTGCGTAGCAATAGGGGGGTTTGGTGCAATCAACGGCATCGTATATTTTATGTTGGTTGTAATC	TCTACGTACGGATTCGTA	TATGTGTATTCGTGCGTAGCAA	mir-3806	-
tca-mir-3806b-4	both	ChLGX	5784181	5784306	TGTAGGTTGAGGAGCATCTCAGTCAATTTTCCTGTTTCTACGTACGGATTCGTACATATTTTTTAAACAATCAGAATATGTGTATTCGTGCGTAGCAATAGGGGGATTTGGTGCAATCAACGGCGT	TCTACGTACGGATTCGTA	TATGTGTATTCGTGCGTAGCAA	mir-3806	-
tca-mir-11617b	both	ChLG2	1333799	1333893	TTTCCGAATTCACTGTTAAGTTGTCATGGAGTAGTACTGTATGGAATATAATAATTATTGTACTTCCTATGGCAGCTTACTAATGAATTCAAATT	AGTTGTCATGGAGTAGTACTGTA	TTGTACTTCCTATGGCAGCTTA	new family2	-
tca-mir-3851l-1	both	ChLG2	1336237	1336328	GAATAAATTTAGTGCTGGGTTGGCATAAGGTGGTACCATGTAACATTTTAACCCATAGTACGACCCATGCCGACTCAGTAATAAATTACAAT	GGTTGGCATAAGGTGGTACCATG	TAGTACGACCCATGCCGACTCA	mir-3851	-
tca-mir-11617c	both	ChLG2	1355378	1355472	TTTCCGAATTCACTGTTGAGTTGGCATAGAGTAGTACTGTATGGAATATGATAATTATTGTACTTCCTATGACAGCTTACTAATGAATTCAAATT	AGTTGGCATAGAGTAGTACTGTA	TTGTACTTCCTATGACAGCTT	new family2	-
tca-mir-3836c-1	both	ChLG2	1355772	1355863	TTTCCGAAATTGCTGCCAGGTCCACCTTTTGCTTTTGTTGATATTTATTTAACTATCACTGGGCAAGGTAGACCTTGGAGTTGTTTCTTAAA	AGGTCCACCTTTTGCTTTTGTTGAT	CACTGGGCAAGGTAGACCTTGG	mir-3836	-
tca-mir-3851n-1	both	ChLG2	1361328	1361433	ATTTTTGAGTAAATTTAGTACTGGGTTGGCACAGAGTAGTACTGTGTAAAATTCTATTTCATAGTACGACCCATGCCGGCCTAGTAAGAAATTTCAATTCACCAGC	GGTTGGCACAGAGTAGTACTGTG	TAGTACGACCCATGCCGGCCTA	mir-3851	-
tca-mir-11617a-1	both	ChLG2	2692443	2692535	TTTTGGAATTCACCATTGAGTTGGCATAGGGTAGTACTGCAGACCAATGTAATTGTAGTACTTCCTAGGGCAGCTTATTAAGGAATTCAAATT	TGAGTTGGCATAGGGTAGTACT	TAGTACTTCCTAGGGCAGCTTA	new family2	-
tca-mir-3836d	both	ChLG2	2691160	2691250	TTTTCGTAATTTCTGCTCGGTCTATCCCTGCTTTGGTTGATATTTATTTAATTATCACTGGGCAAAGTAGGCCCTGCAGTAGTTTCTTCAA	GGTCTATCCCTGCTTTGGTTGATATTT	TCACTGGGCAAAGTAGGCCCTG	mir-3836	-
tca-mir-3836c-2	both	ChLG2	2689646	2689737	TTTTCGAAATTTCTGCCAGGTCCACCTTTTGCTTTTGTTGATATTTATTTATCTATCATTGGGCAAGGTAGACCCTGGAGTGGTTTCTTAAA	AGGTCCACCTTTTGCTTTTGTTGAT	TCATTGGGCAAGGTAGACCCTG	mir-3836	-
tca-mir-11618a-1	both	ChLG2	2688893	2688985	ACAAAATGTTTTCGATGTATAGTTAGCATTGGTCGTTTCTATGCTTTTTTGTGATCATATACCGATCGATGCTCGCTTTATTTCGAGTCACAT	AGTTAGCATTGGTCGTTTCTATG	TATACCGATCGATGCTCGCTTT	new family4	-
tca-mir-3851o-2	both	ChLG2	2688436	2688527	TATTAAATTTAGTGCTTGGTTGGCGTGGAGTGGTACCATGTAAAATTTTAATCCATAGTACGACCCATTCCGGCCCAGTAATAAATTAAAAT	GGTTGGCGTGGAGTGGTACCATG	TAGTACGACCCATTCCGGCCCA	mir-3851	-
tca-mir-3851k-1	both	ChLG2	2687120	2687211	GCATAAATTTAGTGCTGGGTTGGCAAAAGGTGGTACCATGTAACATTTTAACCCATAGTACGACCCATGCCGGCTCAGTAATAAATTACAAT	GGTTGGCAAAAGGTGGTACCATG	TAGTACGACCCATGCCGGCTCA	mir-3851	-
tca-mir-11618b-1	both	ChLG2	2686697	2686791	CAAAATGTTTTCGATACTTAGTTAGCATTGGCTGTTTCTATGCTATTTTATGGTCATAGTACAGCCAGTGCTCACTTCATTTCGGATTCAATAAC	AGTTAGCATTGGCTGTTTCTATG	TAGTACAGCCAGTGCTCACTTC	mir-3851	-
tca-mir-3836e	both	ChLG2	2686164	2686240	ATTTTCTGCTTGGTCTATCCTTGCTTTGGTTGATATTTATTTAATTATCACTGGGCAAAGTAGACCTTGCAGTAGTT	TTGGTCTATCCTTGCTTTGGTTGAT	TCACTGGGCAAAGTAGACCTTG	mir-3836	-
tca-mir-11619e	both	ChLG2	2685848	2685949	AACAAAACTATCGGATGAGAGATGAGAGTTTGCGATAATCTTCATTTTAGAATTTAACAAATGAGGAGTCACAGACTTGATTTTTCGCTCGATTGTTCGACA	CAAAACTATCGGATGAGAGA	ATGAGGAGTCACAGACTTGATT	-	-
tca-mir-3836c-3	both	ChLG2	2685740	2685831	TTTTCGAAATTTCTGCCAGGTCCACCTTTTGCTTTCGTTGATAATTATTTAACTATCACTGGGCAAGGTAGACCCTGGAGTGGTTTCTTAAA	AGGTCCACCTTTTGCTTTCGTTGATA	TCACTGGGCAAGGTAGACCCTG	mir-3836	-
tca-mir-11618a-4	both	ChLG2	2684982	2685066	TGTTTTCGATGTATAGTTAGCATTGGTCGTCTCTATGCTTTTTTATGATCATATACCGATCGATGCTCGCTTTATTTCGAATCAC	AGTTAGCATTGGTCGTCTCTATG	TATACCGATCGATGCTCGCTTT	new family4	-
tca-mir-3851o-1	both	ChLG2	2684529	2684620	TATTAAATTTAGTGCTTGGTTGGCGTAGAGTGGTACCATGTAAAATTTTAATCCATAGTACGACCCATTCCGGCCCAGTAATAAATTAAAAT	GGTTGGCGTAGAGTGGTACCATG	TAGTACGACCCATTCCGGCCCA	mir-3851	-
tca-mir-3851l-2	both	ChLG2	2683248	2683339	GAATAAATTTAATGCTGGGTTGGCATAAGGTGGTACCATGTAACATTTTAACCCATAGTACGATCCATGCCGACTCAGTAATAAATTACAAT	GGTTGGCATAAGGTGGTACCATG	TAGTACGATCCATGCCGACTCA	mir-3851	-
tca-mir-11618b-2	both	ChLG2	2682829	2682923	CAAAATGTTTTCGATACTTAGTTAGCATTGGCTGTTTCTATGCTAATTTATGGTCATAGTACAGCCAGTGCTCACTTCATTTCGGATTCAATAAC	AGTTAGCATTGGCTGTTTCTATG	TAGTACAGCCAGTGCTCACTTC	mir-3851	-
tca-mir-3836f	both	ChLG2	2682284	2682360	ATTTTCTGCTCGGTCTATCCTTGCTTCGGTTGATATTTATTTAATTATCACTGGGGAAAGTAGACCTTGCAGTAGTT	CGGTCTATCCTTGCTTCGGTTGATA	TCACTGGGGAAAGTAGACCTTG	mir-3836	-
tca-mir-11619f	both	ChLG2	2681738	2681831	AAATTATCGAATGAGAGATGAGAGTTTGTGATAATCTTCATTTTAGAATTTAACAAATGAGGAGTCACAGACTTGATCTTTCGCTCGATTGCTC	TGAGAGTTTGTGATAATCTTCATT	AATGAGGAGTCACAGACTTGAT	-	-
tca-mir-11620	both	ChLG2	8256973	8257090	CCGCATGTTCTAGCCCCTCCGGCGGTGCCCCAGGTCAACGGAGCCGTGCATCCTGACGATATCAACGTGATGCCCGGACCGGTGCCCCATGTCAACGCCGCGGGCCAAGGACAGGTCC	CAGGTCAACGGAGCCGTGCATCC	ATGCCCGGACCGGTGCCCCATG	-	-
tca-mir-3851k-2	both	ChLG2	1362341	1362432	GCATAAATTTAGTGCTGGGTTGGCAAAAGGTGGTACCATGTAACATTTTAACCCATAGTACGACCCATGCCGGCTCAGTAATAAATTATAAT	GGTTGGCAAAAGGTGGTACCATG	TAGTACGACCCATGCCGGCTCA	mir-3851	-
tca-mir-11619b	both	ChLG2	1363053	1363144	TTGTCGGGTGTGACACAAAGTCTATGATATTCTTCATTCTATAATTCACCAAATGAAGGGTCACAGACTTTGTCTTCGACCACACTTCATTG	no reads	TGAAGGGTCACAGACTTTGTCT	new family1	-
tca-mir-11621	both	ChLG2	1363442	1363536	CAACCAACTTTCCTTGAGAATAAAGCGTATTTGTCGTTGCATCCTTAACATAAACGCAACGATTCAGGTGCTTTTCTTTCAATCAAAGTTAATAC	ATAAAGCGTATTTGTCGTTGCA	CAACGATTCAGGTGCTTTTCTT	-	-
tca-mir-11619a-3	both	ChLG2	1365639	1365725	CTTTCGAACGGAACACGAAGTCTGTGATATTCTTCATTTTATAATTTAACAAATGAAGCGTCATTGGCTTGGTTTTTCGTTCAACAC	CGAAGTCTGTGATATTCTTCATT	TGAAGCGTCATTGGCTTGGTT	new family1	-
tca-mir-11617a-2	both	ChLG2	1365773	1365865	TTTTGGAATTCACCACTGAGTTGGCATAGGGTAGTACTGCAGACCATTGTAATTGTAGTACTTCCTAGGGCAGCTTATTAATGAATTCATATT	TGAGTTGGCATAGGGTAGTACT	TAGTACTTCCTAGGGCAGCTTA	new family2	-
tca-mir-11622	both	ChLG3	1732366	1732453	ACTAAATCAGTTGATGTAAAGGAATTGCAGGATTGAAATGTCTGCAGCGTTTTAGTCTTGTAAATTCCTTTGGGTTTACTGATAAAAA	TAAAGGAATTGCAGGATTGAAA	TTAGTCTTGTAAATTCCTTTGGG	-	-
tca-mir-11623	both	ChLG5	11212467	11212532	ACACTCGCGTCCGAACGATCACGGCGGAGGGTTGATTTCGCCGGATCGGCTCATGGACGTGGACGA	ACTCGCGTCCGAACGATCACGGCG	CCGGATCGGCTCATGGACGTGGAC	-	-
tca-mir-3851g-1	both	ChLG5	208780	208870	AATTAAATTTAATACTGAGTGGACATGGGGTGATACTGTGTAATTTTTGACTCATAGTACGACCCATGTTGGCTCAGTAATAAATTACATT	AGTGGACATGGGGTGATACTGTG	TAGTACGACCCATGTTGGCTCA	mir-3851	-
tca-mir-11624a-1	both	ChLG5	209129	209220	TAATAGATAAGTGTAAAATTGAGACTTTAACATTTTCATGCAATTTATATCAACATGATATGCTAGAGTGTCGGTTCTACAACTATCACAAA	ATTGAGACTTTAACATTTTCATG	TGATATGCTAGAGTGTCGGTTCT	new family11	-
tca-mir-11624a-2	both	ChLG5	235784	235922	TTTTATGTAGTTTTAAATTATAATAGATTGGTGTAAAATTGAGACTTTAACATTTTCATGCAATTTATATCAACATGATATGCTAGAGTGTCGGTTCTACAACTATCACAAATCAATCTTCGAACTAAGGCTCAAACTT	ATTGAGACTTTAACATTTTCATG	TGATATGCTAGAGTGTCGGTTCT	new family11	-
tca-mir-11624a-3	both	ChLG5	236198	236302	ATAATAGATTGATGTAAAATTGAGACTTTAACATTTTCATGCAATTTATATCAACATGATATGCTAGAGTGTCGGTTTTACAACTATCACAAATCAATCTTCGAA	ATTGAGACTTTAACATTTTCATG	TGATATGCTAGAGTGTCGGTTT	new family11	-
tca-mir-309c	both	ChLG5	7175649	7175737	ATTCCGGTACCACTTTTGGATAAACCATACTCAGTTGATGTATTATAAAGCATCACTGGGTAGAGTTTGTCCAATAGTTTTACCACCAA	GGATAAACCATACTCAGTTGATG	TCACTGGGTAGAGTTTGTCCAA	mir-309	dme-mir-309/3
tca-mir-11624b-1	both	ChLG6	8819743	8819834	TAATAGATTGGAGTAAAATTGAGACTTTAGCATTTTCATGCAATTTATATCAACATGATGTGCTAAAGTGTCGGTTTTACAACAATCACAAA	ATTGAGACTTTAGCATTTTCATG	TGATGTGCTAAAGTGTCGGTTT	new family11	-
tca-mir-3851h	both	ChLG6	8929175	8929264	AATTAAATTTAATATTGAGTGGACATGGGTGGTACTGTGTAATTTTTGACTCATAGTACGGTCCATGTTGGCTCAGTAATAAATTACATT	AGTGGACATGGGTGGTACTGTGTAA	TAGTACGGTCCATGTTGGCTCA	mir-3851	-
tca-mir-11624d	both	ChLG6	8930530	8930621	TAATAGATTGGTGTAAAATTGGGACTTTAGCATTTTCATGCAATTTATATCATCATGATGTGCTAATGTGTCGGTTTTACAACAATCACAAA	ATTGGGACTTTAGCATTTTCATG	TGATGTGCTAATGTGTCGGTTT	new family11	-
tca-mir-3851i	both	ChLG6	273027	273118	TCATTGAATTTAACATTGAGTGGATATGGGGTGGTACTGTGAATTTTTTGAACATAGTACGGCCCATGTCGGCTCACTGATAAATTCCATTT	AGTGGATATGGGGTGGTACTGTG	TAGTACGGCCCATGTCGGCTCA	mir-3851	-
tca-mir-3851j	both	ChLG6	273130	273224	AATAATAAATATGGTGATGAGTTGATTTGGGGTGGTACTATGTTTGAAGATACGCATAGTACGTTCCGAATCAACTTGTTAACAAATTTAAATTC	AGTTGATTTGGGGTGGTACTATG	TAGTACGTTCCGAATCAACTTG	mir-3851	-
tca-mir-11625a	both	ChLG6	273252	273366	ATTAACCAACTTGATTCAAAATTGATTTTAAGTAGACATGAGTGGTGTTTCTGTGGCATTATTCATAATACTGCTAATGTCTCCTGAGACTCGCTTTTGAATACTCCTGGAATAC	AAGTAGACATGAGTGGTGTTTCT	TAATACTGCTAATGTCTCCTGAG	new family6	-
tca-mir-11626a	both	ChLG6	273458	273621	GAAACCTGCCAGGGGTAAGTCATGATTTTCGTCAAGATTTTGGTTTTGTTTGTTGGCATGATTGATTTAGCTCATGTTGAATTGGTTCATGAGTTGATCAAGTAGGCCGAGAAACGGAGCCACCTCCGAATTTTGTGTTTTATTTTTCTTATCTTTGAAGTGGA	TGGCATGATTGATTTAGCTCATG	TGAGTTGATCAAGTAGGCCGAG	new family8	-
tca-mir-11626b	both	ChLG6	8825341	8825447	AATTTTGGTTTTGTTTGTGGGCATGATTGTTTTAGCTCATGTCTCATGATTCATGATGATTGGAAAGCATGAGTTGATCAATCAGGCCAGGAAACAGAACCACCTTC	GGCATGATTGTTTTAGCTCATG	TGAGTTGATCAATCAGGCCAGG	new family8	-
tca-mir-11624c	both	ChLG6	8825488	8825579	TAATAGATTGGTGTAAAATTGAGACTTTAGTATTTTCATGCAATTTATGTCAACATGATATGCTAAAGTGTCGGTTCTACAACAATCACAAA	ATTGAGACTTTAGTATTTTCATG	TGATATGCTAAAGTGTCGGTT	new family11	-
tca-mir-11627	both	ChLG7	11855707	11855798	AGTGTAGGCGATTTTGACCCATCTTCAGACAACTCTGGATTGTTTTAAATGTCCACGAGTTTGCTTTTGATGGGAGATCAATAGTCTTTTAG	ACCCATCTTCAGACAACTCTGG	CGAGTTTGCTTTTGATGGGAGA	-	-
tca-mir-11628	both	ChLG9	10582062	10582156	GCATCAAAATAAGGCGTGAAATTGCAGGAACTCTACTTACGTAATGTTTAATTTTATCGTGAGTAGAGTTCTTGCAGTCAGTTTTATTTTTTTAA	TCAAAATAAGGCGTGAAATTGCAGGAACTC	TGAGTAGAGTTCTTGCAGTCAGT	-	-
tca-mir-11629	both	Unmapped1	925490	925586	ATTAAATGTCAACAATCGGATCATTTTGGACTTTTATAAACATTAATAAAACAGATGTTTAGAAAAGGACAAATTGACCCGATTATTGATATAATAT	TCATTTTGGACTTTTATAAAC	TTTAGAAAAGGACAAATTGACC	-	-
tca-mir-11630	both	Unmapped18	218708	218799	CAGCTACTGGTCTATTAGTCAGATATGGGTGGAATGGTGATGGTAATCATGAACACCCATCAAATTCAGTTATGTCTGGCTGGATACCAGTC	TCAGATATGGGTGGAATGGTGATGG	ATCAAATTCAGTTATGTCTGGC	-	-
tca-mir-3851n-2	both	Unmapped79	10385	10490	ATTTTTGAGTAAATTTAGTACTGGGTTGGCACAGAGTAGTACTGTGTAAAATTCTATTTCATAGTACGACCCATGCCGGCCTAGTAAGAGATTTCATTTCACCAGC	GGTTGGCACAGAGTAGTACTGTG	TAGTACGACCCATGCCGGCCTA	mir-3851	-
tca-mir-3851l-3	both	Unmapped79	1566	1681	TTTAAGCTAAATTTTAGTGAATTTATTGCTGTGTTGGCATAAGTAGTACCATGAAAAATTTGAATCTATAGTACGACCCATGCCGACTCAGTAATAAATTACAATTCCAGCAAGTG	TGTTGGCATAAGTAGTACCATG	TAGTACGACCCATGCCGACTCA	mir-3851	-
tca-mir-3851k-3	both	Unmapped58	11048	11139	GAATAAATTTAGTGCTGGGTTGGCAAAAGGTGGTACCATGTAACATTTTAACCCATAGTACGACCCATGCCGGCTCAGTAATAAATTACAAT	GGTTGGCAAAAGGTGGTACCATG	TAGTACGACCCATGCCGGCTCA	mir-3851	-
tca-mir-11618b-3	both	Unmapped58	11468	11562	CAAAATGTTTTCGATACTTAGTTAGCATTGGCTGTTTCTATGCTAATTTATGGTCATAGTACAGCCAATGTTTGCTTCAGTTCGGATTCAATAAC	AGTTAGCATTGGCTGTTTCTATG	TAGTACAGCCAATGTTTGCTTC	mir-3851	-
tca-mir-11618a-3	both	Unmapped58	11866	11958	AAAATGTTTTCGATAAATAGTTAGCATTGGTCGTTTCTATGCTTCTTCGTGGTCATTGATCGGCCAATGTTCGCTTTATTTCGAATCCTCTAG	AGTTAGCATTGGTCGTTTCTATG	TTGATCGGCCAATGTTCGCTTT	new family4	-
tca-mir-3851m-3	both	Unmapped58	12024	12117	TAAGTAAATTTAGTACTGGGTTGGCACAGAGTAGTACTATGTAAAATTCTATTCCATAGTACGACCCATGTCGGCCCAGTAAGAGATTTCAATT	GGTTGGCACAGAGTAGTACTATG	TAGTACGACCCATGTCGGCCCA	mir-3851	-
tca-mir-11617a-3	both	Unmapped58	7787	7879	TTTTGGAATTCACCATTGAGTTGGCATAGGGTAGTACTGCAGACCATTGTAATTGTAGTACTCCCTAGGGCAGCTTATTAATGAATTCAAATT	TGAGTTGGCATAGGGTAGTACT	TAGTACTCCCTAGGGCAGCTT	new family2	-
tca-mir-11619a-1	both	Unmapped58	7927	8013	CTTTCGAACGGAACACGAAGTCTGTGATATTCTTCATTTTATAATTTAACAAATGAAGAGTCATTGGCTTGGTTTTTCGTTCAACAC	CGAAGTCTGTGATATTCTTCATT	TGAAGAGTCATTGGCTTGGTT	new family1	-
tca-mir-3851m-2	both	Unmapped58	24381	24472	AAGTAAATTTAGTACTGGGTTGGCACAGAGTAGTACTATGTAAAATTCTATTCCATAGTACGACCCATGTCGGCCCAGTAAGAGATTCCAAT	GGTTGGCACAGAGTAGTACTATG	TAGTACGACCCATGTCGGCCCA	mir-3851	-
tca-mir-11618a-5	both	Unmapped58	24542	24628	ATGTTTTCGATAAATAGTTAGCATTGGTCGTTTCTATGCTTCTTCGTGGTCATTGATCGGCCAATGTTCGCTTTATTTCGAATCCTC	AGTTAGCATTGGTCGTTTCTATG	TTGATCGGCCAATGTTCGCTTT	mir-3851	-
tca-mir-11618b-4	both	Unmapped58	25826	25920	CAAAATGTTTTCGATACTTAGTTAGCATTGGCTGTTTCTATGCTAATTTATGGTCATAGTACAGCCAATGTTCGCTTCAGTTCGGATTCAATAAC	AGTTAGCATTGGCTGTTTCTATG	TAGTACAGCCAATGTTCGCTTC	new family4	-
tca-mir-3851k-4	both	Unmapped58	26251	26342	GAATAAATTTAGTGCTGGGTTGGCAAAAGGTGGTACCATGTAACATTTTAACCCATAGTACGACCCATGCCGGCTCAGTAATAAATTACAAT	GGTTGGCAAAAGGTGGTACCATG	TAGTACGACCCATGCCGGCTCA	mir-3851	-
tca-mir-11619a-2	both	Unmapped58	29377	29463	CTTTCGAACGGAACACGAAGTCTGTGATATTCTTCATTTTATAAGTTAACTAATGAAGAGTCATTGGCTTGGTTTTTCGTTCAACAC	CGAAGTCTGTGATATTCTTCATT	TGAAGAGTCATTGGCTTGGTT	new family1	-
tca-mir-11617a-4	both	Unmapped58	29511	29603	TTTTGGAATTCACCATTGAGTTGGCATAGGGTAGTACTGCAGACCATTGTAATTGTAGTACTCCCTAGGGCAGCTTATTAATGAATTCAAATT	TGAGTTGGCATAGGGTAGTACT	TAGTACTCCCTAGGGCAGCTT	new family2	-
tca-mir-11618a-2	both	Unmapped66	4367	4463	ACAAAATGTTTTCGATGTATAGTTAGCATTGGTCGTTTCTATGCTTTTTATGATCATATACCGATCGATGCTCGCTTTATTTCGAATCACATAACTG	AGTTAGCATTGGTCGTTTCTATG	TATACCGATCGATGCTCGCTTT	new family4	-
tca-mir-971b	both	ChLG4	306463	306570	AGCTTTGAGTGTGTATAGTCGGGTCACTCTAAGTTTGAACACCAAGCTACATTTAGCTCGTTTGGTGTTCTACCTTACAGTGAGCGGACTGTACACCAAATCATCACT	CACTCTAAGTTTGAACACCAAGC	TTGGTGTTCTACCTTACAGTGAG	mir-971	dme-mir-971
tca-mir-11619c	dormir	ChLG2	1334086	1334185	AACTATCGGATGAGTGATGATAGTCTGCGATATTCTTCATTTTATAATTTAACAAATGAAGAGTCTCAGACTTGGTCTTACGCTCGATTGCTCGACACAA	TCGGATGAGTGATGATAGTCTGCGATA	TGAAGAGTCTCAGACTTGGTCTTACGCT	new family1	-
tca-mir-11619d	dormir	ChLG2	1355663	1355755	AAACTATCGGATGAGAGATGATAGTCTGCGATATTCTTCATTTTATAATTTAACAAATGAAGAACCTCAGACTTGGTCTTAGGCTCGATTGCT	TGATAGTCTGCGATATTCTTCATTT	ATGAAGAACCTCAGACTTGGTC	new family1	-
tca-mir-3851q	dormir	ChLG2	2684812	2684919	ATTTTGTGAGTACATTTAGTTCTGAGTTGGCATAGAGTAGTACTATGTAAAATTCTTCTCCATTGTACGACCCATGCTGGCCCAGTGAAAGATTTCAATTCACTAACA	TGTGAGTACATTTAGTTCTGAGTTGGCATA	TTGTACGACCCATGCTGGCCCA	mir-3851	-
tca-mir-11625b	dormir	ChLG5	209017	209114	AAGGCTCAAACTTGATTTTAAGTAGACATGAGTGGTATTTATGTTATACATCATTCATAATACTGCTAATGTTTCCTGTGACTCGCTGTTTGAAAACT	AAGTAGACATGAGTGGTATTTATG	TAATACTGCTAATGTTTCCTGTG	new family6	-
tca-mir-3851g-2	dormir	ChLG5	235471	235547	TTTAATACTAAGTGGACATGGGGTGATACTGTGTAATTTTTGACTCATAGCACGACCCGTGTTGGCTCAGTAATATA	AGTGGACATGGGGTGATACTGTG	TAGCACGACCCGTGTTGGCTC	mir-3851	-
tca-mir-11631	dormir	ChLG5	14715761	14715859	GGCAATGGGAGGGGGATTGGCAGCTGGAGTTGACTCTTGATGGACAGCCCCTAGACCACCAAGGGTGGACTTATGCTGTTGATTTCCCGTCACAATATT	TGGCAGCTGGAGTTGACTCTTGA	ACCAAGGGTGGACTTATGCTGT	-	-
tca-mir-3851d-1	dormir	ChLG6	8819480	8819570	AATTAAATTTAATATTGAGTGGACATGGGGTGGTACTGTGTAATTTTTGACCCATAGTACGGCCCATGTTGGCTCAGTAATAAATTACATT	AGTGGACATGGGGTGGTACTGTG	TAGTACGGCCCATGTTGGCTC	mir-3851	-
tca-mir-3858a-2	dormir	ChLG6	8930130	8930244	CTGCAACTGTAACAGTTTGTTGTTTTTTAGTGAAGCGAAGTTTTTTCATTTTAATAAAAATGAAACTCTTTTGCTTCTCTAATAAATACAAATTCATTCTTCCTAACAGTATATA	AGTGAAGCGAAGTTTTTTCATT	TGAAACTCTTTTGCTTCTCT	mir-3858	-
tca-mir-3851d-2	dormir	ChLG6	8930246	8930336	AATTAAATTTAATATTGAGTGCACATGGGGTGGTACTGTGTAATTTTTGACTCATAGTACGGCCCATGTTGGCTCAGTAATAAATTACATT	AGTGCACATGGGGTGGTACTGTG	TAGTACGGCCCATGTTGGCTC	mir-3851	-
tca-mir-3858b	dormir	ChLG6	272928	273018	ACACAGTTTGTTGTTTTTAGAGAAGCGAAGATTTTTCGTTGTGTAAAAAAGAATGAAACTCTTTAGCTTCTCTAATAAATGCAAATTTATT	AGAGAAGCGAAGATTTTTCGTT	TGAAACTCTTTAGCTTCTCTAA	mir-3858	-
tca-mir-11632	dormir	ChLG6	8740458	8740615	AATTCTCTAAACATGCTATACTTTGATTTTAGTAAGGATTTTAATAAGGTTCCCCGCAGGTTTTTTAATAAATAACTCAAAATTAAGTGGTTTATCAGACCCCCTGTTGTCATGGGTAAAAAGTTTTTTAACCAATCAAAGTTTTGCGGTGAAAGATA	TAGTAAGGATTTTAATAAGGTTCCCCGC	TGTTGTCATGGGTAAAAAGTTTTTTAACC	-	-
tca-mir-11633	dormir	ChLG9	5182976	5183034	CCATTTCGGCCGGAGACTTCAACGCTCGCGCAAGCGACGAGCGCCTCCGGGCGATGAAA	TTTCGGCCGGAGACTTCAACGCTCGC	CGACGAGCGCCTCCGGGC	-	-
tca-mir-3836g-1	dormir	Unmapped58	8038	8128	TTTTTGAAATGTCTGTCAGGTCTACCTCTGCTTAAGTTGATATTTATTTAATTATCACTGGGCAAGGTAGACTCTACAGCCGTTTCTTCAA	AGGTCTACCTCTGCTTAAGTTGATA	TCACTGGGCAAGGTAGACTCT	mir-3836	-
tca-mir-3836g-2	dormir	Unmapped58	29269	29345	AATGTCTGTCAGGTCTACCTCTGCTTAAGTTGATATTTATTTAATTATCACTGGGCAAGGTAGACTCTACAGCCGTT	AGGTCTACCTCTGCTTAAGTTGATA	TCACTGGGCAAGGTAGACTCT	mir-3836	-
tca-mir-3851m-4	dormir	Unmapped66	13133	13208	TTAGTACTGGGTTGGCACAGAGTAGTACTATGTAAAATTCTATTTCATAGTACGACCCGTGTCGGCCCAGTAAGAG	GGTTGGCACAGAGTAGTACTATG	TAGTACGACCCGTGTCGGCCCA	mir-3851	-
tca-mir-3851r	dormir	Unmapped66	4524	4597	TAGTTCTGAGTTGGCATAGAGTAGTACTATGTAAAATTTTTCTCCATAGTACGACCCATGCCGGCCCAGTGAAA	AGTTGGCATAGAGTAGTACTATG	TAGTACGACCCATGCCGGCCCA	mir-3851	-
tca-mir-3836c-4	mirdeep	ChLG2	1334221	1334281	AGGTCCACCTTTTGCTTTTGTTGATATTTATTTAACTATCACTGGGCAAGGTAGACCCTGA	AGGTCCACCTTTTGCTTTTGTTGAT	TCACTGGGCAAGGTAGACCCTG	mir-3836	-
tca-mir-11634	mirdeep	ChLG8	12388730	12388798	ATTGGGAGTTCAGGGCGCGGCTGTGACCTGCAGCCACTCGGAGAGGCCGCGCCCCGCACTCGCGAGGTC	ATTGGGAGTTCAGGGCGCGGCT	CCGCGCCCCGCACTCGCGAGGT	-	-
tca-mir-3836c-5	mirdeep	Unmapped66	4155	4215	AGGTCCACCTTTTGCTTTTGTTGATATTTATTTAACTATCACTGGGCAAGGTAGACCCTGG	AGGTCCACCTTTTGCTTTTGTTGAT	TCACTGGGCAAGGTAGACCCTG	mir-3836	-
tca-mir-11635	both	ChLGX	5795359	5795417	GGCGTGCTTCGCTCCATAGATTTTGTATTCGAGAAATCTTTGGAGTGTTGAACGTCACA	no reads	TCTTTGGAGTGTTGAACGTCA	-	-
tca-mir-11636	both	ChLGX	5788871	5788927	TGAGGTCTCGTTTGCTAAATTTTAATTTAACAAAATTTAGGAACATGATTCTCAGAC	TGAGGTCTCGTTTGCTAAATT	ATTTAGGAACATGATTCTCAGA	-	-
tca-mir-3806c	both	ChLGX	5784537	5784597	CTACGTACGGATACGTACATATTTTTTGAACAATCAAAATATGTGTATTCGTGCGTAGCAT	no reads	TATGTGTATTCGTGCGTAGCA	mir-3806	-
tca-mir-11637	both	ChLGX	6247494	6247572	TTTTATAAAGGTTGATTTGGCGCTCGAATCCCAAGTTACTATTCTATGGGTTGAGTGCGCCAAAACCCTTATAAAACGA	TTTTATAAAGGTTGATTTGGCGCTC	no reads	-	-
tca-mir-11638	both	ChLGX	5682408	5682478	TGAAATCGTGCATGTTTCTGTAATGTTGGTTGCATAGCAAAACCATTTCAGGGCATGACACGGGTTCGAGT	no reads	TCAGGGCATGACACGGGTTCGAG	-	-
tca-mir-3836h	both	ChLG2	1347667	1347724	GGTCTATCCTTGCTTAGATTGATATTTATTTTATTGTCACTGGGCAAGGTAGACCCTA	no reads	TCACTGGGCAAGGTAGACCCT	mir-3836	-
tca-mir-11639	both	ChLG2	1348633	1348691	GGGTAAGCAGAGGTTTTACATTTTGTTTTTGAAGGATGAGATCCTCTTGCTTTCCCAAA	no reads	TGAGATCCTCTTGCTTTCCCAA	-	-
tca-mir-11617d-1	both	ChLG2	1363611	1363670	AGTTGGCATGGGTGGTACTATATATATCATAGTAATTATAGTACTTTCTATGGCAACTTA	GTTGGCATGGGTGGTACTATA	no reads	new family2	-
tca-mir-11617e	both	ChLG2	1334429	1334488	AGTTGGCATGGATGGTACTGTATAGATCATAGTAATTATAGTACTTTCTATGGCAACTTA	AGTTGGCATGGATGGTACTGTA	no reads	new family2	-
tca-mir-11617f-1	both	ChLG2	2688112	2688170	CTTGGCATGGGTGGTACTATATGGATTATAGTAATTATAGTACTTTCTATGGCAACTTA	CTTGGCATGGGTGGTACTATA	no reads	new family2	-
tca-mir-3836i-1	both	ChLG2	2683595	2683654	CGGTCTATCTTTGTTTAGACTGATATTTATTTAATTATCACTGGGCAAAGTGGATCTTGC	CGGTCTATCTTTGTTTAGACTG	TCACTGGGCAAAGTGGATCTTG	mir-3836	-
tca-mir-11617f-2	both	ChLG2	2684205	2684263	CTTGGCATGGGTGGTACTATATGGATCATAGTAATTATAGTACTTTCTATGGCAACTTA	CTTGGCATGGGTGGTACTATA	no reads	new family2	-
tca-mir-3836i-2	both	ChLG2	2687488	2687547	CGGTCTATCTTTGTTTAGACTGATATTTATTTAATTATCACTGGGCAAAGTGGATCTTGC	CGGTCTATCTTTGTTTAGACTG	TCACTGGGCAAAGTGGATCTTG	mir-3836	-
tca-mir-11641	both	ChLG3	532740	532797	TAAATCTTTGATCAAAGTGGCCTTCCAATCACAGTCTACTTTGATCGGAAATTTAATT	TAAATCTTTGATCAAAGTGGCC	no reads	-	-
tca-mir-276b	both	ChLG3	12023440	12023499	AGCACGGTATGAAGTTCCTACAGCCGAAAAATCACGTAGGAACTCTATACCTCGCTAGTG	AGCACGGTATGAAGTTCCTA	TAGGAACTCTATACCTCGCT	mir-276 antisense	-
tca-mir-3851g-3	both	ChLG6	8825859	8825916	TTGACATGGGGTGGTACTGTGTAATTTTTGACTCATAGTACGACCCATGTTGGCTCAG	no reads	TAGTACGACCCATGTTGGCTCA	mir-3851	-
tca-mir-11642	both	ChLG6	272831	272890	TGGAAACATTTGATCGTACCATGTTTCAGTTTCAATCATGGTACGATTGATGTTGCCTTA	TGGAAACATTTGATCGTACCATG	CATGGTACGATTGATGTTGCCTT	-	-
tca-mir-11624b-2	both	ChLG6	8929472	8929532	ATTGGGACTTTACCATTTTCATGCAATTTATATCATCATGATGTGCTAAAGTGTCGGTTTT	no reads	TGATGTGCTAAAGTGTCGGTTT	new family11	-
tca-mir-11643	both	ChLG7	3251268	3251330	TGGGGCTGTCGGTGCACGGCTCGCAAATAAAAGTAGTGTCGTTGCGCCGGAAGCCCCGGGGGC	TGGGGCTGTCGGTGCACGGCTC	GTCGTTGCGCCGGAAGCCCCGGG	-	-
tca-mir-6016b	both	ChLG7	14528171	14528228	AGGAGGACTTGTGGGCGTGGCATTGCCGAATAACCACGACCACATGTTCTTCTACTCT	AGGAGGACTTGTGGGCGTGGCA	AACCACGACCACATGTTCTTCT	mir-6016	-
tca-mir-11644	both	ChLG8	338527	338584	TGTTACGTCCAAGGCGTCGGTAAGTAAATTAGGCGTCGACGCCTTGGACGTAGGAACC	TGTTACGTCCAAGGCGTCGGTA	TCGACGCCTTGGACGTAGGAAC	-	-
tca-mir-307b	both	ChLG8	12648350	12648407	TCACTCAAGGAGGTTGTGATGGTACAGCAAACACATCACACCCAGGTTGAGTGAGTCA	TCACTCAAGGAGGTTGTGATG	TCACACCCAGGTTGAGTGAGTC	mir-307	dme-mir-307
tca-mir-927c	both	ChLG9	11531399	11531457	TTCAGAATCCAAACGCTTTGCCAGCCTTTCACACGGTAAAGCGTAGGAATTCTAAACCG	TTCAGAATCCAAACGCTTTG	GGTAAAGCGTAGGAATTCTAAA	mir-927	dme-mir-927
tca-mir-11645	both	Unmapped9	551281	551345	TATAGCCCGGACACTAACGAAATCGCCAAACCGTCCGAGCTTTTGGTTAGCGTCCGCGCCTACAT	TATAGCCCGGACACTAACGAAAT	no reads	-	-
tca-mir-11646	both	Unmapped27	36475	36566	CCATGTTTGACTCCACCTCCAACCGCGACCACATCCAAAACCACCAGGACCATGGGGGTGTCGCTTGTATAGAGAAAGAGGAAACATGATTT	CCATGTTTGACTCCACCTCCAACCG	GGGGTGTCGCTTGTATAGAGAAAGAGGAA	-	-
tca-mir-11647	both	Unmapped30	250764	250832	CACCCGACACACCAAACTTTTATTTCTAACACAGATAATAAAAATAAAAGTTTGGAGTGTCGGGTGTTA	no reads	AAAGTTTGGAGTGTCGGGTGTT	-	-
tca-mir-11648	both	ChLGY	151574	151646	TCACAAGATTGAATAGGACCGGGCTAAGAGGGTCACCCTGTCTCACTCCACGGAGCATCCTTATCGGTCTTGT	TCACAAGATTGAATAGGACCGGGCT	TCCACGGAGCATCCTTATCGGTCTTG	-	-
tca-mir-3851p	both	Unmapped58	22963	23023	GGGTTAGCATAAGTGGTACCATAAAAATTTTTAATCCATAGTACGACAATGCCAACTCAGT	GGTTAGCATAAGTGGTACC	TAGTACGACAATGCCAACTCAG	mir-3851	-
tca-mir-11617d-2	both	Unmapped58	9815	9874	AGTTGGCATGGGTGGTACTATATAGATCATAGTAATTATAGTACTTTCTATGGCAACTTA	GTTGGCATGGGTGGTACTATA	no reads	new family2	-
tca-mir-3836j	both	Unmapped58	27860	27918	GGCCTCTCCTTGCTTTGGTTGATATTTATTTAATTATCACTGGGCAAAGTAGACCCTGC	no reads	TCACTGGGCAAAGTAGACCCTG	mir-3836	-
tca-mir-11617d-3	both	Unmapped58	27516	27575	AGTTGGCATGGGTGGTACTATATAGATCATAGTAATTATAGTACTTTCTATGGCAACTTA	GTTGGCATGGGTGGTACTATA	no reads	new family2	-
tca-mir-3851l-4	both	Unmapped66	8276	8336	GGTTGGCATAAGGTGGTACCATGTAACATTTTAACCCATAGTACGATCCATGCCGACTCAG	GGTTGGCATAAGGTGGTACCATG	TAGTACGATCCATGCCGACTCA	mir-3851	-
tca-mir-11649	both	ChLG4	6991684	6991744	CGGCCGGTCGCAGGCCAGAAATTATACCGTTGAGAGATTTCTGCCTTTGACGGGTTCGCTT	no reads	TTTCTGCCTTTGACGGGTTCGCT	-	-
tca-mir-11650	both	ChLG4	10075035	10075096	CCCGAAAACGTCCTCGAAGTAACGGCACGCGCCATCACTTACTACCTGGACGTCTCGGCGGA	no reads	CCTGGACGTCTCGGCGGA	-	-
Families are determined by sequence homology, and microRNA families with no detectable homolog in other species are in red
