# Supplementary material for: MicroRNA evolution, expression, and function during short germband development in Tribolium castaneum
Source: Genome Res. 2016 Jan;26(1):85–96. doi: 10.1101/gr.193367.115 (PMC4691753; doi:10.1101/gr.193367.115)
Supplement: Supplemental Material [file supp_gr.193367.115_Supplemental_Table2.xlsx]

## Sheet: Tribolium
Supplementary Table 2. Raw read counts of microRNAs in each sequenced small RNA library from oocytes and embryonic time intervals
T.castaneum	oocytes-1	oocytes-2	embryo0-5-1	embryo0-5-2	embryo8-16	embryo16-20	embryo20-24	embryo24-34	embryo34-48	embryo48-144
tca-bantam-3p	4723.5	3068	4656	3889	5201	1454	4026	5102	7888	49557.5
tca-bantam-5p	1	1	3	0	3	0	1	6	8	59
tca-let-7-3p	12	7	8	2	15	2	4	3	2	5
tca-let-7-5p	573	210	473	350	491	196	113	140	81	152
tca-mir-1-3p	9	5	20	13	19	14	25	85	184	3628
tca-mir-1-5p	1	1	1	0	0	1	3	10	3	63
tca-mir-10-3p	5	7	0	1	44	158	699	819	931	1711
tca-mir-10-5p	138	98	215	60	1158	9604	35306.5	48110	91719	359166
tca-mir-100-3p	2	0	0	0	3	2	4	3	4	45
tca-mir-100-5p	1959	1207	855	901	3050	776.5	774	1290	1409	3369
tca-mir-11-3p	902	537	637	439	1417	1468	3058	4614	7477	18441
tca-mir-11-5p	0	0	0	0	4	2	12	8	14	42
tca-mir-12-3p	1	0	1	0	46	18	32	157	114	63
tca-mir-12-5p	478	223	287	242	439	95	354	271	376	3584
tca-mir-124-5p	0	0	1	0	3	0	1	0	5	532
tca-mir-125-3p	0	2	1	0	3	2	1	1	7	18
tca-mir-125-5p	504	274	319	260	300	194	249	160	139	529
tca-mir-133-3p	7	2	1	1	2	3	4	4	1	1577
tca-mir-137-3p	3	4	2	2	3	0	3	2	4	178
tca-mir-13a-3p	365	217.5	178	149	355	112	1103	733	1175	9771.5
tca-mir-13a-5p	33	17	24	28	41	24	27	42	58	197
tca-mir-13b-3p	354.5	251.5	164	144	322	111	818	797	1463	9840.5
tca-mir-13b-5p	4	4	7	3	234	119	370	434	496	1462
tca-mir-14-3p	614	453	188	150	321	124	377	267	303	8476
tca-mir-14-5p	3	6	5	0	73	61	55	91	86	3146.5
tca-mir-184-3p	775	546.5	2759.5	785.5	3272	3548	4553	17387.5	30164.5	132698
tca-mir-184-5p	10	1	2	3	29	72	192	175	178	333
tca-mir-190-3p	0	1	0	0	2	0	4	3	2	17
tca-mir-190-5p	10	5	3	4	45	24	204	245	319	4219
tca-mir-193-3p	1	2	0	0	2	3	6	2	13	287
tca-mir-210-3p	3	0	0	0	1	0	11	5	3	93
tca-mir-210-5p	0	0	0	0	0	0	2	0	3	13
tca-mir-252a-3p	0	0	0	0	0	2	3	0	0	10
tca-mir-252a-5p	31	20	27	15	32	28	120	279	366	3182
tca-mir-252b-3p	1	0	0	0	13	34	90	64	60	43
tca-mir-252b-5p	5	6	5	1	47	214	1216	1990	2930	5571
tca-mir-263a-3p	0	0	0	0	9	31	51	44	49	310
tca-mir-263a-5p	14	10	31	9	472	2909.5	4862	6382	10081	52734
tca-mir-263b-3p	0	0	0	0	0	0	1	0	0	3
tca-mir-263b-5p	57	27	52	22	61	76.5	83	89	138	1548.33
tca-mir-275-3p	3076	2422	542	314	725	488	2244	2420	3405	4787
tca-mir-275-5p	0	0	1	0	448	219	706	491	446	359
tca-mir-276-3p	1316	746	681	251	953	318	1510	1804	3056	58505
tca-mir-276-5p	0	1	1	0	2	0	2	2	2	51
tca-mir-2765-3p	0	0	0	0	7	3	12	43	46	69
tca-mir-2765-5p	0	1	13	2	23	15	176	406	1371	12436
tca-mir-277-3p	97	44	58	30	48	24	78	66	86	637
tca-mir-2788-3p	0	0	0	0	0	3	1	0	1	73
tca-mir-2796-3p	1	0	1	0	2	4	4	2	3	116
tca-mir-279a-3p	4069.5	2118.5	1000.5	889.5	1115	430.5	1997	1234	1478.5	2851.25
tca-mir-279a-5p	58	19	37	17	95	61	123	157	138	212
tca-mir-279b-3p	2731.5	1673.5	758.5	673.5	899	492.5	2208	2259	3277.5	9521.25
tca-mir-279b-5p	1	0	0	1	34	27	68	93	86	101
tca-mir-279c-3p	22972.5	12612.5	17936	14165.5	178089	160613	352700	278488	191002	128641
tca-mir-279c-5p	2	4	2	0	1067	400	398	91	34	33
tca-mir-279d-3p	417	278	117	90	144	50	287	138	187	543.25
tca-mir-279d-5p	109.5	57	193	47	188	145	276	374	603	1155
tca-mir-279e-3p	9154	5832.5	4548	3885.5	8580	7154	21648	28028.5	31968	30744
tca-mir-279e-5p	0	0	0	0	6	1	7.5	6	3	2
tca-mir-281-3p	3	1	2	0	1	2	13	12	25	640
tca-mir-281-5p	28	1	90	11	66	213	355	950	1370	42980.5
tca-mir-282-3p	0	0	0	0	0	0	4	2	1	0
tca-mir-282-5p	0	0	0	0	0	0	34	17	29	24
tca-mir-283-3p	0	0	0	0	0	0	1	0	2	10
tca-mir-283-5p	1239	647	704	500	1077	388	607	809	750	2085
tca-mir-29-3p	10	9	4	1	12	6	18	208	493	283
tca-mir-29-5p	0	0	0	0	0	1	1	0	6	18
tca-mir-2944a-3p	1015.5	560.5	431	413	4293	3443	14189.5	7533	7135	7382.5
tca-mir-2944a-5p	19	18	9	4	285	96	135	148	82	74
tca-mir-2944b-3p	3	2	0	1	294	512	4293	3220	2687	1553
tca-mir-2944b-5p	3	0	0	0	374	932	1976	3637	2804	974
tca-mir-2944c-3p	1085.5	546.5	632	486	1464	891	3506.5	3978	6246	15293.5
tca-mir-2944c-5p	83	66	51	25	129	77	181	463	476	545
tca-mir-2a-3p	655.033	369	662.333	393.5	1367.67	802.667	3426.58	4421.17	6952.58	32304.3
tca-mir-2b-3p	672.033	377	720.333	434.5	1300.67	775.667	3095.08	4023.17	6430.58	29946.8
tca-mir-2b-5p	5	2	6	2	88	46	128	159	180	419
tca-mir-2c-3p	625.033	526	623.333	385	1054.17	452.667	1805.08	2287.67	3876.58	17707.8
tca-mir-2c-5p	8	10	7	7	93	61	162	172	162	308
tca-mir-3049-5p	5	3	14	9	17	16	3	15	10	1395
tca-mir-305-3p	4.5	2	2	2	40	8	79	64	69	107
tca-mir-305-5p	554	326	190	192	485	145	2092	1177	1611	2841
tca-mir-307-3p	1	0	1	0	2	0	4	0	10	223
tca-mir-308-3p	3.5	1	3	4	8	0	7	1	8	18.5833
tca-mir-308-5p	4	0	3	1	19	11	36	33	19	49
tca-mir-309a-3p	1	1	0	0	89	61	1066.5	776.5	787.5	945
tca-mir-309a-5p	0	0	2	2	1775	1830	3560	3720	1787	536
tca-mir-309b-3p	645	305	137	69	17463	7344	45878.5	32898	15419	6542.5
tca-mir-309b-5p	0	0	0	0	114	39	117	33	9	6
tca-mir-31-5p	1595	1024	1588	1264	1733	1252	775	948	725	76708
tca-mir-315-3p	3	1	2	1	2	1	2	2	14	64
tca-mir-315-5p	24	9	14	20	37	18	20	39	914	24613
tca-mir-316-5p	64	34	26	14	23	9	10	8	11	347
tca-mir-317-3p	817	524	241	52	410	51	573	546	258	480
tca-mir-317-5p	0	0	0	0	0	0	4	1	6	9
tca-mir-33-3p	2	1	0	0	8	6	4	7	5	5
tca-mir-33-5p	1	1	0	0	0	0	4	2	2	6
tca-mir-34-3p	2	1	0	0	4	4	6	13	10	13
tca-mir-34-5p	18	12	7	6	10	2	20	19	39	48
tca-mir-3477-3p	114	67	72	40	47	44	53	73	106	200
tca-mir-3477-5p	172	91	65	57	64	16	75	29	41	218
tca-mir-375-3p	4	2	2	2	2	1	5	2	3	13
tca-mir-3791-3p	1366	776	1126	740	48945.5	49267.7	128790	82674	40587	9616
tca-mir-3791-5p	0	0	0	0	137	58	93	39.3333	14	5
tca-mir-3804a-5p	1	2	0	0	0	0	1	0	0	2
tca-mir-3805a-3p	45	24	27	23	40	8	17	10	8	15
tca-mir-3805b-3p	27	16	23	5	28	4	5	8	8	7
tca-mir-3806a-3p	21	5	19	6	71	29	17	13	6	4
tca-mir-3806a-5p	239	90	144	72	152	63	47	57	21	10
tca-mir-3807-3p	78	30	67	26	68	27	7	29	11	7
tca-mir-3809-5p	11	5	15	6	25	3	2	2	4	3
tca-mir-3810-3p	15	5	11	6	8	3	3	1	1	2
tca-mir-3810-5p	182	66	107	42	119	33	45	21	13	7
tca-mir-3811c-1-5p	1	2	0	0	2.33333	1.5	0.5	1	2	0
tca-mir-3811c-2-5p	1	2	0	0	2.33333	1.5	0.5	1	2	0
tca-mir-3811d-5p	0	2	4	1	3	0	1	1	1	0
tca-mir-3812-3p	5	4	0	0	4	1	1	1	4	0
tca-mir-3813-5p	49	26	26	8	36	9	14	6	7	8
tca-mir-3814-3p	29	15	32	12	36	11	14	9	3	8
tca-mir-3816-3p	5	2	5	1	4	1	4	4	0	0
tca-mir-3816-5p	2	1	0	1	1	0	2	1	1	0
tca-mir-3817-3p	22	11	10	1	8	5	3	4	3	2
tca-mir-3818-5p	3	0	4	2	5	0	2	2	1	0
tca-mir-3821-3p	17	4	13	8	8	4	3	3	4	0
tca-mir-3822-3p	40	23	30	18	34	12	19	4	12	8
tca-mir-3824-5p	53	21	64	19	55	11	13	14	9	15
tca-mir-3825-3p	8	4	7	5	11	10	4	6	3	2
tca-mir-3826-3p	35	28	30	9	26	4	14	14	13	8
tca-mir-3827-3p	0	0	1	0	7	18	7	1.33333	2	3
tca-mir-3827-5p	0	0	0	0	1	0.25	0.5	0	0.25	0
tca-mir-3828-3p	13	13	7	0	9	9	2	2	2	2
tca-mir-3828-5p	18	8	19	7	27	7	6	15	6	4
tca-mir-3829-5p	0	2	1	0	1	2	1	0	1	0
tca-mir-3832-3p	132	76	63	60	85	36	35	14	17	31
tca-mir-3832-5p	5	1	0	1	4	0	1	0	0	1
tca-mir-3834-3p	32	9	27	28	9	5	4	8	1	1
tca-mir-3835-3p	6	3	0	2	0	1	1	2	0	12
tca-mir-3836a-3p	397.7	278.75	229.75	340.5	1132.75	131	137.5	149	71.5	27.75
tca-mir-3836b-3p	87.5333	45.6667	88.4167	79.5	5088.42	540	321.667	232	133.5	46.0833
tca-mir-3836b-5p	1	0.5	0	0	30.5	3	4	3	2	0
tca-mir-3838-3p	172.167	52.5	51	42	50.5	30	24.5	19	14	4
tca-mir-3838-5p	6	6	1	2	2	1	2	0	2	1
tca-mir-3840-3p	153	73	59	53	628	217	2255	709	346	101
tca-mir-3840-5p	1	1	1	1	241	48	72	16	14	13
tca-mir-3841-3p	2003	977	848	893	45837	30788	93005.5	36928	15391	3728.5
tca-mir-3841-5p	5	3	6	8	851	351	429	176	141	141
tca-mir-3842-3p	4	2	2	0	4	4	22	14	18	45
tca-mir-3842-5p	9	2	6	4	27	28	33	54	56	55
tca-mir-3843-3p	1.5	5	1	1	10	6	27.5	14	11	12
tca-mir-3843-5p	4	2	0	2	705	302	242	86	64	48
tca-mir-3849-3p	0	0	0	0	0	4	7	9	8	24
tca-mir-3849-5p	0	0	0	0	1	3	31	38	44	189
tca-mir-3851a-1-3p	258.9	115.833	216.5	133.5	4249.67	439.5	299.033	346.5	221.7	76
tca-mir-3851a-1-5p	5.28333	3.83333	4.2	3.41667	99.5833	5.08333	2.5	5.58333	3	4.16667
tca-mir-3851a-2-3p	258.9	115.833	216.5	133.5	4249.67	439.5	299.033	346.5	221.7	76
tca-mir-3851a-2-5p	4.28333	3.83333	5.2	4.41667	99.5833	5.08333	2.5	4.58333	3	4.16667
tca-mir-3851b-3p	30.25	15	24.75	24	2115.25	154.5	72.5	108.5	67.5	16
tca-mir-3851b-5p	4.78333	3.33333	4.2	2.91667	99.0833	5.08333	2	4.58333	3	4.16667
tca-mir-3851c-3p	147.067	61	114.783	59.9167	1943.55	194	216.717	175.167	114.667	69.4
tca-mir-3851c-5p	3.2	0.5	0	1	34.75	3	2	3.5	3	1.5
tca-mir-3851d-3p	1	0	0	1	48.5	4	4	3	0	1
tca-mir-3851d-5p	147.067	61	115.033	59.9167	1943.55	193	216.717	175.167	115.333	69.4
tca-mir-3851e-3p	19.75	8.33333	11.7	3.75	260.967	23	43.1833	27.5	28.4667	40.4
tca-mir-3851e-5p	2.45	1.5	1.2	0.25	46	3.25	4	2.75	2	2
tca-mir-3851f-3p	147.567	61	115.033	60.4167	1943.55	193	216.717	175.167	115.333	69.4
tca-mir-3853-3p	1	0	0	0	0	0	1	1	0	0
tca-mir-3855-3p	458.5	251	354	154	208	152	125	82	56	76
tca-mir-3855-5p	61	43	45	19	44	9	19	17	18	44
tca-mir-3858a-1-3p	0	1	0	0	29	3	6	2	3	2
tca-mir-3858a-1-5p	1.5	0	1.5	0.5	19.3333	1	2.66667	2	0.333333	1.83333
tca-mir-3859-5p	2.5	6	1	0	0	0	1	0	2	9
tca-mir-3862-5p	3	13	7	18	34	7	12	14	15	32
tca-mir-3864-3p	46	20	17	5	9	8	3	6	3	11
tca-mir-3865-5p	4	2	2	1	1	0	1	0	0	0
tca-mir-3866-5p	10	3	3	3	4	1	1	7	2	7
tca-mir-3867-5p	0.5	0	1	0	2	0	1	5.5	5	12
tca-mir-3869-3p	32	15	35	15	10	4	23	1	1	11
tca-mir-3872-5p	10	3	2	0	4	2	3	0	0	0
tca-mir-3880-3p	61	25	31	19	27	10	8	10	7	13
tca-mir-3880-5p	73.5	15.8333	23.6667	25.8333	23.6667	12.8333	12.5	13.8333	5.5	0.5
tca-mir-3881-3p	20	5	11	7	8	5	18	16	9	25
tca-mir-3881-5p	86	39	33	33	42	14	50	27	17	39
tca-mir-3882-3p	23	16	10	5	17	8	12	8	4	1
tca-mir-3882-5p	53.5	46.5	31	36	31	12	26	7	4	14
tca-mir-3883-3p	12	21.5	10	3	6	2.5	7	1	3	2
tca-mir-3884-3p	42.5	32.5	17	13.5	7.83333	14.5	11.5	5	3	3.83333
tca-mir-3884-5p	31.8333	14	30.6667	19	16.6667	5	22	6.33333	4	3
tca-mir-3889-3p	62	47	35	42	3273	1717	7012	3304	1605	421
tca-mir-3889-5p	4	2	1	0	305	103	157	48	23	14
tca-mir-3893-3p	57	34	56	31	10205	7945	32829.5	21719.5	15609.3	9628.33
tca-mir-3893-5p	2	0	1	3	493	77	122	60	16	4
tca-mir-3897-5p	0	0	0	0	0	0	1	0	0	1
tca-mir-6007-3p	3	0	0	0	2	0	1	0	0	0
tca-mir-6007-5p	129	64	133	94	206	77	34	58	34	36
tca-mir-6016-3p	3	1	4	1	6	1	4	4	2	2
tca-mir-6016-5p	1	4	4	0	4	5	6	7	3	3
tca-mir-6018-5p	0	0	2	2	1	0	2	0	0	0
tca-mir-7-3p	0	1	0	0	1	0	4	2	4	9
tca-mir-7-5p	1	1	3	0	17	26	41	73	190	945
tca-mir-71-3p	8521	5252	4066	2879	3822	3138	7355	9984	12806	31507.5
tca-mir-71-5p	59	45	36	30	123	113	182	382	504	1199
tca-mir-750-3p	2	36	26	6	15	8	10	6	7	525
tca-mir-87a-3p	53.5	59	15	9	19	5	34	36.5	53	667.5
tca-mir-87a-5p	0	0	0	0	0	0	2	3	2	29
tca-mir-87b-3p	74.5	35	24	16	27	13	37	58.5	102	1001.5
tca-mir-87b-5p	7	4	8	5	27	7	35	79	105	536
tca-mir-927a-3p	0	1	0	1	0	0	1	1	1	157
tca-mir-927a-5p	3	1	0	0	6	5	7	17	26	2007
tca-mir-927b-3p	0	0	0	1	0	2	14	12	2	8
tca-mir-927b-5p	48	19	20	24	29	21	89	126	108	477
tca-mir-929-5p	0	0	0	0	0	1	4	0	1	84
tca-mir-92a-3p	260	158.667	111.5	52	153.5	208.5	1883	3046.5	4650.5	3590.5
tca-mir-92a-5p	0	0	0	0	0	0	1	0	2	1
tca-mir-92b-3p	1781	1022.67	765	406	1922	5175	34397	54750.5	73531	30983
tca-mir-92b-5p	2	2	0	1	21	14	94	153	157	112
tca-mir-92c-3p	3368	1771.67	1567.5	1220	2555	3324.5	7609	11789	12703.5	8516.5
tca-mir-92c-5p	0	0	0	2	5	3	5	5	9	13
tca-mir-965-3p	56	39	23	19	31	14	48	47	80	375
tca-mir-965-5p	1	0	0	0	2	0	1	1	2	11
tca-mir-970-3p	116	69	77	29	75	45	85	100	111	463
tca-mir-970-5p	0	0	1	0	11	6	3	2	7	46
tca-mir-980-3p	2	5	0	0	0	0	3	0	1	26
tca-mir-980-5p	2	1	1	1	0	0	1	16	21	42
tca-mir-981-3p	1	0	2	1	2	3	1	2	2	542
tca-mir-989-3p	0	1	1	0	12	2	7	6	13	53
tca-mir-993-3p	16	13	2	1	45	37	146	350	721	1406
tca-mir-993-5p	5	6	3	1	15	0	37	67	128	645
tca-mir-995-3p	52	82	17	20	32	29	50	69	120	235
tca-mir-995-5p	4	2	0	0	37	31	39	60	82	121
tca-mir-998-3p	106	76	67	48	93	102	147	194	258	486
tca-mir-998-5p	61	24	60	41	266	282	360	594	563	313
tca-mir-9a-3p	2	0	0	0	13	13	33	45	79	509
tca-mir-9a-5p	59.5	35	45	17	358	363	2528.5	3462	5495	39515
tca-mir-9b-3p	10	5	1	0	3	3	3	6	7	59
tca-mir-9b-5p	20	12	4	4	13	6	26	21	22	64
tca-mir-9c-3p	0	0	0	0	49	14	21	3	6	2
tca-mir-9c-5p	116	70	71	67	1074	718	1840	1439	1003	1048
tca-mir-9d-3p	0	5	3	2	411	652	4080	3982	4160	3259
tca-mir-9d-5p	1	2	0	1	94	82	863	489	512	565
tca-mir-9e-3p	2	4	2	1	6	6	11	11	19	39
tca-mir-9e-5p	1102.5	782	476	439	889	451	1151.5	1738	2641	4384
tca-mir-iab-4-5p	18	22	14	11	11	2	6	37	42	362
tca-mir-iab-8-5p	15	10	7	8	19	1	8	31	36	43
tca-mir-3851m-1-5p	0.25	0.25	0.25	0	7.5	1.45	0	1	0.25	0
tca-mir-276b-5p	2	0	1	0	1	0	0	2	0	0
tca-mir-11620-3p	5	1	0	0	0	1	0	0	1	0
tca-mir-11615-3p	1	0	0	0	0	0	0	1	0	1
tca-mir-3851g-1-5p	1.5	1	1	0	13.5	0.5	0	0	1	0
tca-mir-11628-3p	3	1	0	0	4	3	0	0	5	2
tca-mir-11628-5p	2	1	1	0	1	1	0	0	0	1
tca-mir-3851m-3-5p	0.75	0.25	0.25	0	8	1.45	0	1	0.25	0
tca-mir-3851m-2-5p	0.75	0.25	0.25	0	8	1.45	0	1	0.25	0
tca-mir-11625b-5p	0.25	0	0	0.25	22.5	1.91667	0	0	0.666667	0
tca-mir-3851g-2-5p	0.5	1	0	0	8.5	0.5	0	0	1	0
tca-mir-3851m-4-5p	0.25	0.25	0.25	0	7.5	1.45	0	1	0.25	0
tca-mir-316-3p	6	1	0	0	0	1	0	1	0	21
tca-mir-3803-3p	5	2	1	2	3	3	0	2	0	1
tca-mir-3808-3p	1	0	0	0	1	0	0	0	0	0
tca-mir-3813-3p	1	0	1	3	3	1	0	0	1	0
tca-mir-3814-5p	1	2	3	0	1	0	0	0	1	1
tca-mir-3815-3p	1	0	1	0	2	0	0	0	0	1
tca-mir-3815-5p	1	0	3	0	1	0	0	0	0	0
tca-mir-3833-5p	1	2	2	0	3	0	0	0	0	2
tca-mir-3835-5p	63	60	3	3	2	0	0	2	1	4
tca-mir-3860-5p	1	0	0	0	0	0	0	2	3	5
tca-mir-3883-5p	13	10	6	5	6	3	0	0	0	0
tca-mir-932-3p	1	0	0	0	0	0	0	0	0	7
tca-mir-932-5p	1	1	0	0	0	0	0	0	0	128
tca-mir-iab-8-3p	1	0	1	0	5	0	0	3	0	7
tca-mir-11643-3p	0	1	0	0	1	1	0	1	0	2
tca-mir-11645-5p	0	1	1	0	1	1	0	2	8	8
tca-mir-2a-5p	0	1	1	0	5	1	0	3	5	24
tca-mir-3804b-5p	0	1	0	0	0	0	0	0	0	0
tca-mir-3824-3p	0	1	1	0	1	0	0	0	0	0
tca-mir-3836a-5p	0	1	0	0	5.33333	0	0	0	0	0
tca-mir-3851f-5p	0	1	0.2	0	1	0.5	0	0	0	0
tca-mir-3854-3p	0	1	0	1	0	0	0	1	0	1
tca-mir-3862-3p	0	1	0	0	0	0	0	0	0	0
tca-mir-3877-5p	0	4	0	0	0	0	0	0	1	2
tca-mir-11617c-5p	0	0	1	0	9.5	1.4	0	2.8	1	1
tca-mir-3836i-1-5p	0	0	0	0	0.2	0	0	0	0	0
tca-mir-3836i-2-5p	0	0	0	0	0.2	0	0	0	0	0
tca-mir-11642-3p	0	0	0	0	1	0	0	0	0	0
tca-mir-3836c-1-5p	0	0	0	0	1.75	0.25	0	0.25	0	0
tca-mir-3851n-1-5p	0	0	0	0	2.5	0	0	0	0	0
tca-mir-3851p-3p	0	0	0	0	15	1	0	1	1	0
tca-mir-3851p-5p	0	0	0	0	0.333333	0	0	0	0	0
tca-mir-3851l-4-5p	0	0	0	0	0.8	0	0	0	0	0
tca-mir-3836c-2-5p	0	0	0	0	1.75	0.25	0	0.25	0	0
tca-mir-3851o-2-5p	0	0	0	0	5	0	0	0	0	0
tca-mir-3851k-1-5p	0	0	0.25	0.25	2.75	0	0	0.25	0	0
tca-mir-11618b-1-3p	0	0	0	0	7	0	0	0.5	0	0
tca-mir-11619e-5p	0	0	0	0	2.83333	0	0	0	0	0
tca-mir-11618a-4-5p	0	0	0	0	17	0	0	1	0	0
tca-mir-3851o-1-5p	0	0	0	0	1	0	0	0	0	0
tca-mir-3851l-2-5p	0	0	0	0	0.8	0	0	0	0	0
tca-mir-11618b-2-3p	0	0	0	0	7	0	0	0.5	0	0
tca-mir-3836f-5p	0	0	0	0	78	2	0	0	0	0
tca-mir-3851k-2-5p	0	0	0.25	0.25	2.75	0	0	0.25	0	0
tca-mir-11621-3p	0	0	0	0	16	0.25	0	0	0	0
tca-mir-3851h-5p	0	0	0	0	1	0	0	0	0	0
tca-mir-3851i-5p	0	0	0	0	10.5	0	0	1	0	0
tca-mir-3851n-2-5p	0	0	0	0	2.5	0	0	0	0	0
tca-mir-3851k-3-5p	0	0	0.25	0.25	2.75	0	0	0.25	0	0
tca-mir-3851k-4-5p	0	0	0.25	0.25	2.75	0	0	0.25	0	0
tca-mir-11619d-3p	0	0	0	0	1	1	0	1	0	0
tca-mir-3851d-2-5p	0	0	0	0	4	0	0	2	0	0
tca-mir-11617b-3p	0	0	0	0	3	0	0	0	0	0
tca-mir-3858b-5p	0	0	0	0	1	0	0	0	0	0
tca-mir-3836c-4-5p	0	0	0	0	1.75	0.25	0	0.25	0	0
tca-mir-3851l-1-5p	0	0	0	0	0.8	0	0	0	0	0
tca-mir-3836c-5-5p	0	0	0	0	1.75	0.25	0	0.25	0	0
tca-mir-124-3p	0	0	0	0	1	0	0	0	0	214
tca-mir-3049-3p	0	0	0	0	1	0	0	0	0	1
tca-mir-3804b-3p	0	0	0	0	1	0	0	0	0	0
tca-mir-3811e-5p	0	0	0	1	1	0	0	0	0	0
tca-mir-3825-5p	0	0	0	1	1	0	0	1	0	0
tca-mir-3826-5p	0	0	0	0	2	0	0	0	0	0
tca-mir-1000-5p	0	0	0	0	0	0	0	1	4	645
tca-mir-2788-5p	0	0	0	0	0	1	0	1	2	58
tca-mir-3831-3p	0	0	0	0	0	0	0	1	1	4
tca-mir-3839-5p	0	0	0	0	0	0	0	1	3	34
tca-mir-3854-5p	0	0	0	0	0	0	0	2	0	1
tca-mir-3857-5p	0	0	0	0	0	0	0	1	1	3
tca-mir-iab-4-3p	0	0	0	0	0	0	0	1	1	13
tca-mir-137-5p	0	0	0	0	0	0	0	0	1	5
tca-mir-307-5p	0	0	0	0	0	0	0	0	2	4
tca-mir-1175-3p	0	0	1	0	0	0	0	0	0	11
tca-mir-3812-5p	0	0	1	0	0	1	0	0	0	1
tca-mir-3820-5p	0	0	2	1	0	0	0	0	0	0
tca-mir-3859-3p	0	0	1	1	0	0	0	0	0	0
tca-mir-989-5p	0	0	1	0	0	0	0	0	0	2
tca-mir-927c-5p	0	0	0	0	0	0	0	0	0	2
tca-mir-11629-5p	0	0	0	0	0	1	0	0	0	1
tca-mir-1000-3p	0	0	0	0	0	0	0	0	0	29
tca-mir-1175-5p	0	0	0	0	0	0	0	0	0	10
tca-mir-133-5p	0	0	0	0	0	0	0	0	0	36
tca-mir-219-3p	0	0	0	0	0	0	0	0	0	63
tca-mir-219-5p	0	0	0	0	0	0	0	0	0	7
tca-mir-2796-5p	0	0	0	0	0	0	0	0	0	9
tca-mir-3833-3p	0	0	0	0	0	0	0	0	0	6
tca-mir-3861-5p	0	0	0	0	0	0	0	0	0	3
tca-mir-3892-3p	0	0	0	0	0	0	0	0	0	1
tca-mir-3892-5p	0	0	0	0	0	0	0	0	0	2
tca-mir-6012-3p	0	0	0	0	0	0	0	0	0	42
tca-mir-6012-5p	0	0	0	0	0	0	0	0	0	7
tca-mir-750-5p	0	0	0	0	0	0	0	0	0	2
tca-mir-929-3p	0	0	0	0	0	0	0	0	0	13
tca-mir-981-5p	0	0	0	0	0	0	0	0	0	10
tca-mir-8-3p	633	431	367	318	2561	4369	26142	32462	36909	105771
tca-mir-8-5p	17	7	8	4	237	553	1235	1257	672	1270
tca-mir-3851m-1-3p	12.5333	14.7333	5	3.33333	169.533	6	45.6667	11	4	4.66667
tca-mir-11617c-3p	0	0	0	0	11	1	2	1	1	1
tca-mir-11617e-5p	0	0	1	1	45.6	6	3.2	1	1	0
tca-mir-11617f-1-5p	0	0	0	0	243.7	11.5	7	13.5	5.5	0
tca-mir-3836i-1-3p	0.25	0	0.25	0	33.9167	0.75	2.5	1.58333	0.5	0.25
tca-mir-11617f-2-5p	0	0	0	0	242.7	12.5	7	13.5	5.5	0
tca-mir-3836i-2-3p	0.25	0	0.25	0	33.9167	0.75	2.5	1.58333	0.5	0.25
tca-mir-11641-5p	11	8	7	7	5	1	1	2	1	0
tca-mir-276b-3p	57	56	46	36	63	32	26	15	12	14
tca-mir-3851g-3-3p	24.8333	12	14	15.3333	619.867	25.8333	124.667	39.1667	11.3333	12.8333
tca-mir-11642-5p	0	0	0	0	26	1	5	0	0	1
tca-mir-3836c-1-3p	5	1	1.5	1	165.583	31.2333	20.7	16.1	8	1.7
tca-mir-11624b-2-3p	0.5	0	0.5	0	416.083	18	21.25	8	5	2
tca-mir-11643-5p	0	0	0	0	1	2	2	1	2	3
tca-mir-6016b-3p	10	2	10	5	5	4	5	9	7	0
tca-mir-6016b-5p	4	0	6	0	5	3	2	2	2	0
tca-mir-11644-3p	1.33333	1.33333	0.333333	1.83333	4.86667	9.6	3.66667	2.66667	2.53333	2.33333
tca-mir-11644-5p	3	1	0	2	2	1	2.5	0	0	1
tca-mir-307b-3p	0	0	0	0	2	1	2	4	1	1
tca-mir-307b-5p	0	0	0	0	0	0	1	0	1	0
tca-mir-927c-3p	1	0	0	1	3	0	2	0	2	17
tca-mir-11646-3p	0.2	0	0	0	2.25	0	0.25	0	0	0.5
tca-mir-11646-5p	1.5	0	0.5	0	7.5	8	5.5	3.5	2	0.5
tca-mir-11647-3p	0	0	1	0	1	4.5	3	2	3	4.5
tca-mir-11648-3p	5.18333	0.666667	1.5	0.333333	2.45	1.41667	3.7	1.25	1.16667	0.333333
tca-mir-11648-5p	361.25	126	235	139	171.583	105.333	122.917	71.3333	38.3333	24
tca-mir-3851n-1-3p	0.5	0	0.5	0	81.5	8.5	165.083	33.8333	16.5	6
tca-mir-11617d-2-5p	1	0.333333	0.333333	0.333333	26.8	1.33333	2.78333	1.33333	0	0
tca-mir-3836j-3p	11.2	8.33333	5	6.66667	1370.03	40.3333	230.167	29.1667	10.6667	11.25
tca-mir-11617d-3-5p	1	0.333333	0.333333	0.333333	26.8	1.33333	2.78333	1.33333	0	0
tca-mir-3851l-4-3p	19	9	41.5	24.5	5283.75	625	491	368.5	180	53.5
tca-mir-11649-3p	0	0	0	0	0	0	1	0	0	31
tca-mir-11650-3p	2	7	1	0	4	2	2	3	0	0
tca-mir-11617a-1-3p	2.5	0	0.5	1	757.5	60.5	51.3333	27.5	6.5	0.5
tca-mir-11617a-1-5p	3.5	2	4.5	1.75	161.75	30.65	14.25	21.3	11.75	9
tca-mir-3836d-3p	1.2	1	0	0	10.2	2	31.75	0	0	0
tca-mir-3836d-5p	0	0	0	0	3	1	1	2	0	0
tca-mir-3836c-2-3p	0	0	0	0	333.5	12	27.25	5	7.5	2
tca-mir-11618a-1-3p	5.66667	4	4.66667	2	1201.33	98.3333	187.333	77	42.6667	11.3333
tca-mir-11618a-1-5p	38.25	25.75	26	21.25	719.5	51.25	50.25	55.5	39	26.25
tca-mir-3851o-2-3p	0.2	0.4	0.5	0	129	4	18.75	5.5	2	0
tca-mir-3851k-1-3p	3.8	3.8	1	1.2	172.5	7.4	21.2	6	3.6	2.8
tca-mir-11618b-1-5p	0.25	0.25	0.25	0.25	13.75	0.25	2	0	0	0.25
tca-mir-11614-3p	0	0	0	0	5	1	2	4	11	9
tca-mir-11614-5p	3	5	3	0	3	4	3	6	3	2
tca-mir-3836e-3p	26.2	13	27	15.5	4307.25	322	325.833	137.833	49	7.25
tca-mir-3836e-5p	0	1	0	0	5	0	1	1	1	0
tca-mir-11619e-3p	25	24	9.33333	8	324.5	44	57	31	22	11
tca-mir-3836c-3-3p	8.08333	1.16667	6.75	7	3201.9	103.483	257.533	96.9333	48.5	18.0333
tca-mir-3836c-3-5p	0	0	0	0	7	0	1	0	0	0
tca-mir-11618a-4-3p	5.66667	4	4.66667	2	1201.33	98.3333	187.333	77	42.6667	11.3333
tca-mir-3851o-1-3p	0.2	0.4	0.5	0	129	4	18.75	5.5	2	0
tca-mir-3851l-2-3p	19	9	41.5	24.5	5283.75	625	491	368.5	180	53.5
tca-mir-11618b-2-5p	0.25	0.583333	0.25	0.25	13.75	0.25	2	0	0	0.25
tca-mir-3836f-3p	0	0	0	0	181.333	18	24.6667	7	5	3
tca-mir-11619f-3p	29.5	22.5	10.8333	11	148.5	20.5	26.5	16.8333	8.5	8.5
tca-mir-11619f-5p	0	0	0	0	45	4	5	2	0	1
tca-mir-11620-5p	3	2	0	2	4	2	3	3	1	2
tca-mir-11615-5p	0	1	0	0	4	1	5	3	4	1
tca-mir-3851k-2-3p	3.8	3.8	1	1.2	172.5	7.4	21.2	6	3.6	2.8
tca-mir-11619b-3p	4	0	1	1	3	1	2	2	1	1.5
tca-mir-11621-5p	0	0	0	0	12	1	6	1	1	0
tca-mir-11619a-3-3p	5	2	0.5	0.5	533	24.5	78	36	20	15
tca-mir-11619a-3-5p	0.333333	0.333333	0.333333	0	54	2.66667	5.33333	1.66667	2	0.333333
tca-mir-11617a-2-3p	2.5	0	0.5	1	758.5	62.5	52.3333	27.5	6.5	1.5
tca-mir-11617a-2-5p	4.5	2	4.5	1.75	163.083	30.65	14.25	21.3	11.75	9
tca-mir-11622-3p	0	0	2	0	1	1	1	3	4	7
tca-mir-11622-5p	3	0	2	3	5	4	8	8	16	38
tca-mir-11623-3p	1	1	0	0	0	0	3	0	0	1
tca-mir-11623-5p	1	1	0	0	1	0	4	1	2	27
tca-mir-3851g-1-3p	24.8333	12	14	15.3333	621.867	25.8333	124.667	39.1667	11.3333	12.8333
tca-mir-11624a-1-3p	0	0	0.2	0.333333	540.067	33.0333	26.5833	15.6667	6.33333	4.16667
tca-mir-11624a-1-5p	0.666667	0	0	0	26	0.333333	3.95	1	0	0.666667
tca-mir-11624a-2-3p	0	0	0.2	0.333333	540.067	33.0333	26.5833	15.6667	6.33333	4.16667
tca-mir-11624a-2-5p	0.666667	0	0	0	26	0.333333	3.95	1	0	0.666667
tca-mir-3806b-1-3p	10	5.95	6.6	2.8	6.95	1.05	4.75	1.55	1	1.55
tca-mir-3806b-1-5p	1.5	0.75	2.25	2.5	2	0	0.75	0	0	1.5
tca-mir-11624a-3-3p	0	0	0.2	0.333333	221.817	7.53333	13.5	9.66667	4.33333	7.16667
tca-mir-11624a-3-5p	0.666667	0	0	0	26	0.333333	3.95	1	0	0.666667
tca-mir-309c-3p	89	46	58	36	5616	3879	23073	14239.5	12675.5	7694.5
tca-mir-309c-5p	0	0	0	0	93	67	97	37	9	0
tca-mir-11624b-1-3p	0.5	0	0.7	0	418.483	18.2	21.25	8	5	2
tca-mir-11624b-1-5p	4.5	2	8	4	1453.5	86	150.95	74	51	47
tca-mir-3851h-3p	44	27	90	38	1482.83	129	259	107	77	75
tca-mir-11624d-3p	0	0	0	0	4.66667	0	1	1	0	0
tca-mir-11624d-5p	0.5	0	3	1	186	13	34	20	6	17
tca-mir-3851i-3p	0	0	0	0	100.167	1	30	11	5	5
tca-mir-3851j-3p	0.5	1	0.7	1	328.8	15.5	23.1	23.5	25.3	5.4
tca-mir-3851j-5p	0	0	0	0	58	4	3	2	2	2
tca-mir-11625a-3p	1	1	1	1	793	59	75	41	26	4
tca-mir-11625a-5p	0.25	0	0	0.25	33.5	4.25	6	2	2	1
tca-mir-11626a-3p	6	3	1	1	976	91	44	22	18	2
tca-mir-11626a-5p	2	0	0	1	488	37	77	26	4	4
tca-mir-11626b-3p	6.5	1	2.5	2.5	757	75	78	48.5	20.5	7
tca-mir-11626b-5p	0.5	0	0	1	96	4	7	1	1	1
tca-mir-3806b-2-3p	10	5.95	6.6	2.8	6.95	1.05	4.75	1.55	1	1.55
tca-mir-3806b-2-5p	1.5	0.75	2.25	2.5	2	0	0.75	0	0	1.5
tca-mir-11624c-3p	1	0	0.2	0	151.15	8.2	13.5	9	5	1.5
tca-mir-11624c-5p	0	0	3	0	138.5	4	17	12	3	11
tca-mir-11627-3p	10	1	3	2	3	2	3	0	0	0
tca-mir-11627-5p	430	273	329.5	170	208	136	59	95	70	110
tca-mir-11629-3p	0	0	0	0	1	2	1	2	6	14
tca-mir-11630-3p	0	0	1	1	19	23	72	52	48	154
tca-mir-11630-5p	0	0	0	0	0	0	1	1	0	2
tca-mir-3851n-2-3p	0.5	0	0.5	0	81.5	8.5	165.083	33.8333	16.5	6
tca-mir-3851l-3-3p	10.5	5.8	14	9.5	349.65	64.5	66.2	55.2	35.3	7.6
tca-mir-3851l-3-5p	1	1	1	0	23	5	16	1	2	3
tca-mir-3851k-3-3p	3.8	3.8	1	1.2	172.5	7.4	21.2	6	3.6	2.8
tca-mir-11618b-3-3p	0	0	0	0	6	1	1.5	3	0	0
tca-mir-11618b-3-5p	0.25	0.583333	0.25	0.25	13.75	0.25	2	0	0	0.25
tca-mir-11618a-3-3p	24.5	14	17	13.5	704	58.5	128.5	74.5	44	28
tca-mir-11618a-3-5p	38.75	25.75	27	21.25	720	51.25	50.25	56	39	26.25
tca-mir-3806b-3-3p	10	5.95	6.6	2.8	6.95	1.05	4.75	1.55	1	1.55
tca-mir-3806b-3-5p	1.5	0.75	2.25	2.5	2	0	0.75	0	0	1.5
tca-mir-3851m-3-3p	12.5333	14.7333	5	3.33333	170.033	6	45.1667	11	4	4.66667
tca-mir-11617a-3-3p	1	0.5	0.5	0	30	2	4.5	1	0	0
tca-mir-11617a-3-5p	3.5	2	4.5	1.75	162.083	30.65	14.25	21.3	11.75	9
tca-mir-11619a-1-3p	1	0.5	0	1	108.5	4	10.5	5	1.5	3
tca-mir-11619a-1-5p	0.333333	0.333333	0.333333	0	54	2.66667	5.33333	1.66667	2	0.333333
tca-mir-3851m-2-3p	12.5333	14.7333	5	3.33333	170.033	6	45.1667	11	4	4.66667
tca-mir-11618a-5-3p	24.5	14	17	13.5	704	58.5	128.5	74.5	44	28
tca-mir-11618a-5-5p	38.75	25.75	27	21.25	720	51.25	50.25	56	39	26.25
tca-mir-11618b-4-3p	2	2	2	2	195	9	46.5	10	7	12
tca-mir-11618b-4-5p	0.25	0.583333	0.25	0.25	13.75	0.25	2	0	0	0.25
tca-mir-3851k-4-3p	3.8	3.8	1	1.2	172.5	7.4	21.2	6	3.6	2.8
tca-mir-11619a-2-3p	0	0.5	0	0	107.5	4	10.5	5	1.5	3
tca-mir-11619a-2-5p	0.333333	0.333333	0.333333	0	54	2.66667	5.33333	1.66667	2	0.333333
tca-mir-11617a-4-3p	1	0.5	0.5	0	30	2	4.5	1	0	0
tca-mir-11617a-4-5p	3.5	2	4.5	1.75	162.083	30.65	14.25	21.3	11.75	9
tca-mir-11618a-2-3p	5.66667	4	4.66667	2	1201.33	98.3333	187.333	77	42.6667	11.3333
tca-mir-11618a-2-5p	38.25	25.75	26	21.25	719.5	51.25	50.25	55.5	39	26.25
tca-mir-3806b-4-3p	10	5.95	6.6	2.8	6.95	1.05	4.75	1.55	1	1.55
tca-mir-3806b-4-5p	1.5	0.75	2.25	2.5	3	0	0.75	0	0	1.5
tca-mir-971b-3p	0	0	0	0	0	0	1	1	1	107
tca-mir-971b-5p	2	0	0	0	2	1	4	2	9	90
tca-mir-11619c-3p	0	0	0	0	3	0	1	0	0	0
tca-mir-11619c-5p	19.8333	8.5	7.33333	5.25	106.833	20	13	13.9167	5.16667	2.16667
tca-mir-11619d-5p	19.8333	8.5	7.33333	5.25	106.833	20	13	14.9167	5.16667	2.16667
tca-mir-3851q-3p	0	0	0	0	10	3	2	1	0	0
tca-mir-3851q-5p	0.666667	0	0.333333	0.666667	0.583333	0	0.333333	0	0.333333	0
tca-mir-11625b-3p	1	1	2	0.5	27.75	3	3.5	1	1	0.5
tca-mir-3851g-2-3p	1.33333	1	3	0.333333	54.6667	2.33333	3.66667	2.66667	3.33333	0.333333
tca-mir-11631-3p	0	0	1	0	1	2	6	4	2	10
tca-mir-11631-5p	3.33333	3	1	0	1	6	15	4	6	13
tca-mir-3851d-1-3p	4.5	0.5	1.5	0.5	62.3333	0	12	3.5	1	0.5
tca-mir-3851d-1-5p	1	0	0	1	48.5	4	4	3	0	1
tca-mir-3858a-2-3p	0.2	0.4	0.4	0.2	5.8	0	1	0	0	0
tca-mir-3858a-2-5p	0.5	0	0.5	0	19.3333	1	2.66667	2	0.333333	1.83333
tca-mir-3851d-2-3p	10.5	5.5	10.5	5.5	63.3333	4	12	4.5	1	2.5
tca-mir-11617b-5p	0	0	0	0	29	0	1	0	1	0
tca-mir-3858b-3p	1	0	0	0	12	1	3	0	0	0
tca-mir-11632-3p	0.5	0	2	0	2	1	3	1	1	0
tca-mir-11632-5p	3	1	0	0	2	0	3.5	1	1	1
tca-mir-11633-3p	0	0	0	0	0	2	1	5	8	22
tca-mir-11633-5p	0	0	1	0	6	14	20	42	53	157
tca-mir-3836g-1-3p	87.5333	45.6667	88.4167	79.5	5088.42	540	321.667	232	133.5	46.0833
tca-mir-3836g-1-5p	0.5	0	1.5	1	129.833	13.5	2.5	1.5	1.5	0.5
tca-mir-3836g-2-3p	87.5333	45.6667	88.4167	79.5	5089.42	540	321.667	232	133.5	46.0833
tca-mir-3836g-2-5p	0.5	0	1.5	1	129.833	13.5	2.5	1.5	1.5	0.5
tca-mir-3851m-4-3p	0	0	0	0	5	0	3	1	2	0
tca-mir-3851r-3p	1	0	0	1	73	2	16.3333	5.33333	1	0
tca-mir-3851r-5p	0.666667	0	0.333333	0.666667	2.5	0.2	0.666667	0.666667	0.333333	0
tca-mir-3836c-4-3p	8.08333	1.16667	9.25	7	3230.2	105.983	259.533	97.9333	49	18.0333
tca-mir-11634-3p	0	0	0	0	1	0	1	2	0	2
tca-mir-11634-5p	1	1	0	0	38	68	73	77	48	43
tca-mir-3851l-1-3p	10.5	5.8	14	9.5	349.65	65.5	66.2	55.2	36.3	7.6
tca-mir-3836c-5-3p	8.08333	1.16667	6.75	7	3202.4	103.483	257.533	96.9333	48.5	18.0333
tca-mir-11635-3p	220	90	184	81	169	38	76	38	21	24
tca-mir-11636-3p	11	1	5	3	13	0	3	2	0	5
tca-mir-11636-5p	17	8	5	7	7	4.5	2	3	1	0
tca-mir-3806c-3p	17	4.2	7.6	2.8	9.2	1.8	9	3.8	1	2.8
tca-mir-11637-5p	3	1	4	3	5	3	1	2	1	0
tca-mir-11638-3p	4	0	0	1	4	5	16	7	5	5
tca-mir-3836h-3p	6.75	1.5	5.25	5	179.25	14.15	31.2	16.6	10.5	5.7
tca-mir-11639-3p	0	1	0	0	15	3	1	3	0	1
tca-mir-11617d-1-5p	2	0.333333	0.333333	0.333333	26.8	1.33333	2.78333	1.33333	0	0

## Sheet: Drosophila
D.melanogaster	oocytes-1	oocytes-2		D.virilis	oocytes-1	oocytes-2
bantam	1891	1397		dvi-bantam	1179	1232
dme-mir-263a	12.5	4		dvi-mir-10	10	9
dme-mir-10	83	58		dvi-mir-1003	28	29
dme-mir-1003	8	3		dvi-mir-1006	0	1
dme-mir-1006	4	1		dvi-mir-1010	1	3
dme-mir-1007	1	0		dvi-mir-11	280	300
dme-mir-1009	0	1		dvi-mir-12	1	1
dme-mir-1010	57	47.5		dvi-mir-13b-1	19	18
dme-mir-1012	27	18		dvi-mir-13b-2	19	19
dme-mir-1013	1	0		dvi-mir-14	531	641.5
dme-mir-11	552	406		dvi-mir-184	191	157
dme-mir-12	4	5		dvi-mir-190	23	43
dme-mir-13b-1	29.5	21		dvi-mir-263a	2	3
dme-mir-13b-2	29.5	21		dvi-mir-275	151	167
dme-mir-14	686.5	487		dvi-mir-276a	2	0
dme-mir-184	562	420		dvi-mir-277	5	10
dme-mir-190	32	18		dvi-mir-278	0	1
dme-mir-275	355	215		dvi-mir-279	317	349
dme-mir-276a	1	1		dvi-mir-281-1	2	0
dme-mir-277	2	0		dvi-mir-281-2	9	8
dme-mir-279	382	238		dvi-mir-282	36	30
dme-mir-281-1	32	23		dvi-mir-283	16	14
dme-mir-281-2	106	85		dvi-mir-286	33	38
dme-mir-282	20	17		dvi-mir-2a-1	16.3333	21.5
dme-mir-283	16	21		dvi-mir-2a-2	18.3333	20.5
dme-mir-286	55	29		dvi-mir-2b	174.333	207
dme-mir-2a-1	40.1667	29.0833		dvi-mir-3	0	2
dme-mir-2a-2	44.1667	34.0833		dvi-mir-305	214	212.5
dme-mir-2b-1	221.5	146.25		dvi-mir-306	78	71
dme-mir-2b-2	223.5	149.25		dvi-mir-308	10	7
dme-mir-2c	1.66667	0.333333		dvi-mir-310	4050.5	4239.5
dme-mir-3	1	0		dvi-mir-311	4599	4723.5
dme-mir-305	287	196		dvi-mir-313	256	273
dme-mir-306	176	110		dvi-mir-317	149	162
dme-mir-308	7	3		dvi-mir-318	1	1
dme-mir-310	813	630		dvi-mir-33	72	58
dme-mir-311	6067	4465		dvi-mir-34	0	7
dme-mir-312	3775	3273		dvi-mir-4	2	0
dme-mir-313	142.5	97.5		dvi-mir-5	1	0
dme-mir-318	1	1		dvi-mir-6-1	0.666667	0.666667
dme-mir-31b	12	11		dvi-mir-6-2	0.666667	0.666667
dme-mir-33	122	116		dvi-mir-6-3	0.666667	0.666667
dme-mir-4950	1	0		dvi-mir-7	2	1
dme-mir-5	2	0		dvi-mir-79	3	1
dme-mir-6-1	1.5	0.333333		dvi-mir-8	6	2
dme-mir-6-2	1.5	0.333333		dvi-mir-92a	254	257
dme-mir-6-3	1	0.333333		dvi-mir-92b	3590.5	3656.5
dme-mir-7	2	1		dvi-mir-956	3	0
dme-mir-79	2	2		dvi-mir-957	2	0
dme-mir-8	192	151		dvi-mir-965	0	5
dme-mir-92a	393	287		dvi-mir-970	11	8
dme-mir-92b	3965.5	3137		dvi-mir-975	0	1
dme-mir-954	1	0		dvi-mir-988	7	7
dme-mir-965	1	1		dvi-mir-995	963	944
dme-mir-970	36	39		dvi-mir-996	115	157
dme-mir-981	0	1		dvi-mir-998	1	2
dme-mir-986	88	80		dvi-mir-999	105	129
dme-mir-987	1	0		dvi-mir-9a	1	0
dme-mir-988	12	9		dvi-mir-9b	143	151
dme-mir-989	0	1		dvi-mir-9c	888	919
dme-mir-995	1823	1256		dvi-mir-9541	3	0
dme-mir-996	119	89		dvi-mir-9543a	1	0
dme-mir-998	3	4		dvi-mir-9546	0	3
dme-mir-999	79	61
dme-mir-9a	1	0
dme-mir-9b	284	162
dme-mir-9c	1879	1122
