# Supplementary material for: MicroRNA evolution, expression, and function during short germband development in Tribolium castaneum
Source: Genome Res. 2016 Jan;26(1):85–96. doi: 10.1101/gr.193367.115 (PMC4691753; doi:10.1101/gr.193367.115)
Supplement: Supplemental Material [file supp_gr.193367.115_Supplemental_Table3.xlsx]

## Sheet: DESeq-canonical targets
Supplementary Table 3a. MicroRNA target enrichment in down-, up- and not- regulated protein-coding genes between oocytes and 8-16 h, 16-24 h and 24-48h intervals. Data is obained using the canonical sites prediction method, and differential expression is estimated by the DESeq algorithm. Shading of columns showing targets enrichment p-values reflects increasingly significant estimates.
	number of targets in all genes	number of all genes	numbers of down-regulated genes (fold difference >2; p<0.05) between oocytes and				numbers of up-regulated genes (fold difference >2; p<0.05) between oocytes and				numbers of notregulated genes (fold difference <2; p>0.05) between oocytes and				numbers of microRNA targets within down-regulated genes (fold difference >2; p<0.05) between oocytes and				numbers of microRNA targets within up-regulated genes (fold difference >2; p<0.05) between oocytes and				numbers of microRNA targets within notregulated genes (fold difference <2; p>0.05) between oocytes and				-LOG10 p-value of microRNA target enrichment within down-regulated genes (fold difference >2; p<0.05) between oocytes and				-LOG10 p-value of microRNA target enrichment within up-regulated genes (fold difference >2; p<0.05) between oocytes and				-LOG10 p-value of microRNA target enrichment within notregulated genes (fold difference <2; p>0.05) between oocytes and
			8-16 h	16-24 h	24-48 h	all	8-16 h	16-24 h	24-48 h	all	8-16 h	16-24 h	24-48 h	all	8-16 h	16-24 h	24-48 h	all	8-16 h	16-24 h	24-48 h	all	8-16 h	16-24 h	24-48 h	all	8-16 h	16-24 h	24-48 h	all	8-16 h	16-24 h	24-48 h	all	8-16 h	16-24 h	24-48 h	all
tca-mir-3851m-1-3p	277	16503	1382	2198	2349	813	2880	3512	3684	2296	2043	1529	1331	182	59	65	55	37	68	82	90	60	29	24	21	3	11.3016	5.89809	2.42593	7.99153	2.99629	3.40848	4.49761	3.83406	0.0916654	0.232156	0.249774	0.437473
tca-mir-3851m-1-5p	314	16503	1382	2198	2349	813	2880	3512	3684	2296	2043	1529	1331	182	27	48	51	17	77	87	94	64	30	21	25	3	0.40646	0.878704	0.871992	0.541952	3.2679	2.58981	3.21574	3.25162	0.0315823	0.0283091	0.324096	0.340237
tca-mir-11617c-3p	790	16503	1382	2198	2349	813	2880	3512	3684	2296	2043	1529	1331	182	97	141	146	53	156	198	219	129	88	84	70	7	4.32834	4.04997	3.53439	2.03728	1.41681	2.41051	3.95349	1.67382	0.0712953	1.09892	0.742436	0.188577
tca-mir-11617c-5p	314	16503	1382	2198	2349	813	2880	3512	3684	2296	2043	1529	1331	182	27	48	51	17	77	87	94	64	30	21	25	3	0.40646	0.878704	0.871992	0.541952	3.2679	2.58981	3.21574	3.25162	0.0315823	0.0283091	0.324096	0.340237
tca-mir-11617e-5p	314	16503	1382	2198	2349	813	2880	3512	3684	2296	2043	1529	1331	182	27	48	51	17	77	87	94	64	30	21	25	3	0.40646	0.878704	0.871992	0.541952	3.2679	2.58981	3.21574	3.25162	0.0315823	0.0283091	0.324096	0.340237
tca-mir-11617f-1-5p	695	16503	1382	2198	2349	813	2880	3512	3684	2296	2043	1529	1331	182	78	113	106	43	163	204	227	125	81	59	57	4	2.50153	2.00861	0.70037	1.27991	4.79274	6.92198	10.2579	3.0497	0.154933	0.130591	0.385484	0.05252
tca-mir-3836i-1-3p	231	16503	1382	2198	2349	813	2880	3512	3684	2296	2043	1529	1331	182	50	54	47	26	41	58	63	35	20	24	22	2	10.0166	5.01579	2.39637	4.55144	0.386098	1.17092	1.50838	0.592306	0.0207933	0.629323	0.764634	0.327848
tca-mir-3836i-1-5p	166	16503	1382	2198	2349	813	2880	3512	3684	2296	2043	1529	1331	182	17	27	26	11	44	48	55	36	18	10	10	0	0.809314	0.958025	0.592186	0.926064	2.91527	2.1238	3.32754	2.66135	0.168625	0.040561	0.100947	0.0742798
tca-mir-11617f-2-5p	695	16503	1382	2198	2349	813	2880	3512	3684	2296	2043	1529	1331	182	78	113	106	43	163	204	227	125	81	59	57	4	2.50153	2.00861	0.70037	1.27991	4.79274	6.92198	10.2579	3.0497	0.154933	0.130591	0.385484	0.05252
tca-mir-3836i-2-3p	231	16503	1382	2198	2349	813	2880	3512	3684	2296	2043	1529	1331	182	50	54	47	26	41	58	63	35	20	24	22	2	10.0166	5.01579	2.39637	4.55144	0.386098	1.17092	1.50838	0.592306	0.0207933	0.629323	0.764634	0.327848
tca-mir-3836i-2-5p	166	16503	1382	2198	2349	813	2880	3512	3684	2296	2043	1529	1331	182	17	27	26	11	44	48	55	36	18	10	10	0	0.809314	0.958025	0.592186	0.926064	2.91527	2.1238	3.32754	2.66135	0.168625	0.040561	0.100947	0.0742798
tca-mir-11641-5p	1123	16503	1382	2198	2349	813	2880	3512	3684	2296	2043	1529	1331	182	145	186	193	87	229	316	340	176	125	107	80	7	7.46475	3.27087	2.74613	5.06043	2.43997	8.15955	10.2505	1.43498	0.0462418	0.453041	0.0582185	0.029699
tca-mir-276b-3p	332	16503	1382	2198	2349	813	2880	3512	3684	2296	2043	1529	1331	182	45	49	57	24	83	114	117	69	25	32	27	7	3.31592	0.714499	1.26036	1.62926	3.74955	8.00153	7.67758	3.69711	0.00120654	0.44205	0.3656	1.50654
tca-mir-276b-5p	101	16503	1382	2198	2349	813	2880	3512	3684	2296	2043	1529	1331	182	10	11	9	5	25	29	31	21	8	10	11	0	0.650023	0.149728	0.0342884	0.4207	1.63833	1.5406	1.72829	1.69502	0.0496874	0.477748	0.947473	0.170792
tca-mir-3851g-3-3p	277	16503	1382	2198	2349	813	2880	3512	3684	2296	2043	1529	1331	182	59	65	55	37	68	82	90	60	29	24	21	3	11.3016	5.89809	2.42593	7.99153	2.99629	3.40848	4.49761	3.83406	0.0916654	0.232156	0.249774	0.437473
tca-mir-11642-3p	332	16503	1382	2198	2349	813	2880	3512	3684	2296	2043	1529	1331	182	31	48	50	21	87	101	107	69	43	27	32	2	0.646024	0.621001	0.524683	1.01122	4.68676	4.51811	5.00074	3.69711	0.472443	0.137655	0.908303	0.14724
tca-mir-11642-5p	492	16503	1382	2198	2349	813	2880	3512	3684	2296	2043	1529	1331	182	49	80	78	23	101	125	123	77	56	38	50	5	1.05669	1.61659	0.872196	0.25936	1.49987	1.95318	1.16799	0.93259	0.138784	0.0606947	1.41987	0.337398
tca-mir-3836c-1-3p	149	16503	1382	2198	2349	813	2880	3512	3684	2296	2043	1529	1331	182	22	21	22	14	33	43	45	29	23	16	15	5	2.5143	0.474435	0.430575	2.16953	1.25527	1.96719	2.02303	1.65118	0.974815	0.662863	0.833905	2.20728
tca-mir-3836c-1-5p	212	16503	1382	2198	2349	813	2880	3512	3684	2296	2043	1529	1331	182	22	34	42	14	45	57	57	39	29	20	21	1	0.920231	0.984914	2.01964	0.992646	1.19638	1.69015	1.31877	1.58059	0.614541	0.390199	0.875615	0.166578
tca-mir-11624b-2-3p	241	16503	1382	2198	2349	813	2880	3512	3684	2296	2043	1529	1331	182	18	29	36	11	52	71	68	44	29	20	30	2	0.191723	0.164971	0.474758	0.278169	1.39793	3.00079	1.90071	1.63923	0.286751	0.187374	2.18629	0.302705
tca-mir-11643-3p	381	16503	1382	2198	2349	813	2880	3512	3684	2296	2043	1529	1331	182	40	66	65	23	104	110	113	77	43	31	38	3	1.23866	2.0037	1.30092	0.885815	6.32003	3.79776	3.52558	3.61883	0.146481	0.126386	1.13632	0.215561
tca-mir-11643-5p	141	16503	1382	2198	2349	813	2880	3512	3684	2296	2043	1529	1331	182	15	16	19	10	37	42	42	28	18	18	9	3	0.881636	0.150181	0.264668	1.05312	2.50645	2.19617	1.83158	1.73018	0.416771	1.2079	0.148996	1.14967
tca-mir-6016b-3p	170	16503	1382	2198	2349	813	2880	3512	3684	2296	2043	1529	1331	182	17	25	24	7	44	59	56	36	15	13	10	1	0.745354	0.596396	0.33427	0.219273	2.69054	4.77574	3.30051	2.47469	0.0424223	0.144253	0.0878491	0.250466
tca-mir-6016b-5p	168	16503	1382	2198	2349	813	2880	3512	3684	2296	2043	1529	1331	182	12	17	18	9	45	52	53	40	26	26	20	5	0.181652	0.0610276	0.0516387	0.501297	3.06581	2.9313	2.68865	3.73766	1.03223	2.48518	1.53079	1.96331
tca-mir-11644-3p	107	16503	1382	2198	2349	813	2880	3512	3684	2296	2043	1529	1331	182	5	8	11	3	29	33	39	25	15	16	9	1	0.0490914	0.0190781	0.0701933	0.108414	2.36242	2.13925	3.54078	2.56191	0.607433	1.71814	0.441798	0.480563
tca-mir-11644-5p	370	16503	1382	2198	2349	813	2880	3512	3684	2296	2043	1529	1331	182	32	49	46	17	82	114	125	69	44	36	27	5	0.42245	0.319497	0.0847681	0.254414	2.10852	5.269	6.92614	2.38355	0.240137	0.473042	0.175979	0.647719
tca-mir-307b-3p	237	16503	1382	2198	2349	813	2880	3512	3684	2296	2043	1529	1331	182	18	29	28	9	62	79	86	45	21	19	19	1	0.21205	0.188871	0.0775708	0.132931	3.57521	5.2826	6.52519	1.94939	0.0245668	0.152926	0.346552	0.131246
tca-mir-307b-5p	508	16503	1382	2198	2349	813	2880	3512	3684	2296	2043	1529	1331	182	44	60	68	25	118	139	158	99	54	52	50	10	0.434366	0.081694	0.164691	0.347613	3.50974	3.41263	5.89182	3.78316	0.0576501	0.704401	1.21658	1.59377
tca-mir-927c-3p	543	16503	1382	2198	2349	813	2880	3512	3684	2296	2043	1529	1331	182	66	100	100	39	106	135	147	90	81	57	39	6	3.07805	3.58148	2.60417	2.13428	1.04586	1.74343	2.46154	1.49551	1.49847	0.853521	0.124468	0.407002
tca-mir-927c-5p	508	16503	1382	2198	2349	813	2880	3512	3684	2296	2043	1529	1331	182	43	74	72	23	135	159	168	104	48	53	40	4	0.366638	0.741463	0.314848	0.211513	7.16867	7.50192	8.23026	4.83913	0.00949196	0.799964	0.28196	0.178261
tca-mir-11645-5p	134	16503	1382	2198	2349	813	2880	3512	3684	2296	2043	1529	1331	182	11	15	14	4	42	43	42	33	9	8	12	0	0.348405	0.143463	0.0584123	0.0993034	4.58663	2.91585	2.24523	3.53809	0.0106968	0.0539077	0.546242	0.110648
tca-mir-11646-3p	158	16503	1382	2198	2349	813	2880	3512	3684	2296	2043	1529	1331	182	11	24	19	5	40	49	55	32	19	19	12	3	0.167151	0.687766	0.125876	0.0988701	2.33842	2.83181	3.95773	1.99353	0.306461	1.02728	0.290511	1.01045
tca-mir-11646-5p	654	16503	1382	2198	2349	813	2880	3512	3684	2296	2043	1529	1331	182	55	82	91	33	158	189	205	133	64	64	62	8	0.346041	0.153415	0.24626	0.400853	5.4275	5.96651	7.69531	5.79631	0.00905045	0.535791	1.10229	0.528407
tca-mir-11647-3p	937	16503	1382	2198	2349	813	2880	3512	3684	2296	2043	1529	1331	182	86	146	145	49	210	255	264	166	97	94	81	8	0.78411	1.7618	0.913154	0.5278	4.57496	5.44119	5.18529	3.48568	0.0120518	0.731803	0.638679	0.147533
tca-mir-11648-3p	80	16503	1382	2198	2349	813	2880	3512	3684	2296	2043	1529	1331	182	7	10	10	4	16	23	25	14	8	7	13	2	0.450555	0.297351	0.223176	0.444581	0.652662	1.3764	1.63539	0.858575	0.173069	0.332115	2.34791	1.23264
tca-mir-11648-5p	541	16503	1382	2198	2349	813	2880	3512	3684	2296	2043	1529	1331	182	56	99	99	30	98	138	144	74	52	51	39	6	1.37728	3.45223	2.49905	0.667388	0.500783	2.14725	2.1446	0.273279	0.0107796	0.386492	0.129198	0.411036
tca-mir-3851n-1-3p	277	16503	1382	2198	2349	813	2880	3512	3684	2296	2043	1529	1331	182	59	65	55	37	68	82	90	60	29	24	21	3	11.3016	5.89809	2.42593	7.99153	2.99629	3.40848	4.49761	3.83406	0.0916654	0.232156	0.249774	0.437473
tca-mir-3851n-1-5p	314	16503	1382	2198	2349	813	2880	3512	3684	2296	2043	1529	1331	182	27	48	51	17	77	87	94	64	30	21	25	3	0.40646	0.878704	0.871992	0.541952	3.2679	2.58981	3.21574	3.25162	0.0315823	0.0283091	0.324096	0.340237
tca-mir-3851p-3p	277	16503	1382	2198	2349	813	2880	3512	3684	2296	2043	1529	1331	182	59	65	55	37	68	82	90	60	29	24	21	3	11.3016	5.89809	2.42593	7.99153	2.99629	3.40848	4.49761	3.83406	0.0916654	0.232156	0.249774	0.437473
tca-mir-3851p-5p	212	16503	1382	2198	2349	813	2880	3512	3684	2296	2043	1529	1331	182	25	30	33	14	60	70	76	52	24	17	16	3	1.50009	0.500629	0.599978	0.992646	4.54059	4.63469	5.64996	4.95779	0.197634	0.163188	0.262171	0.684534
tca-mir-11617d-2-5p	695	16503	1382	2198	2349	813	2880	3512	3684	2296	2043	1529	1331	182	78	113	106	43	163	204	227	125	81	59	57	4	2.50153	2.00861	0.70037	1.27991	4.79274	6.92198	10.2579	3.0497	0.154933	0.130591	0.385484	0.05252
tca-mir-3836j-3p	231	16503	1382	2198	2349	813	2880	3512	3684	2296	2043	1529	1331	182	50	54	47	26	41	58	63	35	20	24	22	2	10.0166	5.01579	2.39637	4.55144	0.386098	1.17092	1.50838	0.592306	0.0207933	0.629323	0.764634	0.327848
tca-mir-11617d-3-5p	695	16503	1382	2198	2349	813	2880	3512	3684	2296	2043	1529	1331	182	78	113	106	43	163	204	227	125	81	59	57	4	2.50153	2.00861	0.70037	1.27991	4.79274	6.92198	10.2579	3.0497	0.154933	0.130591	0.385484	0.05252
tca-mir-3851l-4-3p	277	16503	1382	2198	2349	813	2880	3512	3684	2296	2043	1529	1331	182	59	65	55	37	68	82	90	60	29	24	21	3	11.3016	5.89809	2.42593	7.99153	2.99629	3.40848	4.49761	3.83406	0.0916654	0.232156	0.249774	0.437473
tca-mir-3851l-4-5p	314	16503	1382	2198	2349	813	2880	3512	3684	2296	2043	1529	1331	182	27	48	51	17	77	87	94	64	30	21	25	3	0.40646	0.878704	0.871992	0.541952	3.2679	2.58981	3.21574	3.25162	0.0315823	0.0283091	0.324096	0.340237
tca-mir-11649-3p	293	16503	1382	2198	2349	813	2880	3512	3684	2296	2043	1529	1331	182	23	38	40	17	72	79	86	51	36	32	24	1	0.239158	0.277285	0.241703	0.702839	3.13683	2.09845	2.72984	1.43314	0.32321	0.857101	0.382568	0.077304
tca-mir-11650-3p	150	16503	1382	2198	2349	813	2880	3512	3684	2296	2043	1529	1331	182	14	19	26	9	32	43	49	26	17	14	10	3	0.562404	0.272086	0.938063	0.686937	1.05258	1.91403	2.90785	1.02684	0.226386	0.378852	0.171935	1.07317
tca-mir-11617a-1-3p	501	16503	1382	2198	2349	813	2880	3512	3684	2296	2043	1529	1331	182	61	82	81	35	116	138	142	98	58	43	47	4	2.92327	1.70455	1.0243	1.81986	3.40651	3.52774	3.24896	3.81471	0.166382	0.173781	0.920558	0.186196
tca-mir-11617a-1-5p	273	16503	1382	2198	2349	813	2880	3512	3684	2296	2043	1529	1331	182	20	39	39	14	62	68	75	47	30	27	30	1	0.160608	0.550485	0.349205	0.432578	1.99305	1.20379	1.74004	1.30197	0.13992	0.503779	1.47807	0.0933585
tca-mir-3836d-3p	231	16503	1382	2198	2349	813	2880	3512	3684	2296	2043	1529	1331	182	50	54	47	26	41	58	63	35	20	24	22	2	10.0166	5.01579	2.39637	4.55144	0.386098	1.17092	1.50838	0.592306	0.0207933	0.629323	0.764634	0.327848
tca-mir-3836d-5p	252	16503	1382	2198	2349	813	2880	3512	3684	2296	2043	1529	1331	182	22	37	37	14	60	74	79	49	29	27	20	3	0.438838	0.642224	0.424525	0.582451	2.41418	3.04842	3.49427	2.25742	0.207544	0.744429	0.326936	0.518925
tca-mir-3836c-2-3p	213	16503	1382	2198	2349	813	2880	3512	3684	2296	2043	1529	1331	182	21	32	40	14	46	53	56	38	28	18	11	1	0.74685	0.701624	1.59229	0.979945	1.31787	1.06441	1.14734	1.37332	0.494344	0.218803	0.0309761	0.164989
tca-mir-3836c-2-5p	212	16503	1382	2198	2349	813	2880	3512	3684	2296	2043	1529	1331	182	22	34	42	14	45	57	57	39	29	20	21	1	0.920231	0.984914	2.01964	0.992646	1.19638	1.69015	1.31877	1.58059	0.614541	0.390199	0.875615	0.166578
tca-mir-11618a-1-3p	160	16503	1382	2198	2349	813	2880	3512	3684	2296	2043	1529	1331	182	19	21	24	13	41	51	60	34	16	14	13	2	1.33755	0.326886	0.469581	1.57319	2.47865	3.21659	5.37865	2.40913	0.105478	0.283355	0.381093	0.586327
tca-mir-11618a-1-5p	212	16503	1382	2198	2349	813	2880	3512	3684	2296	2043	1529	1331	182	25	30	33	14	60	70	76	52	24	17	16	3	1.50009	0.500629	0.599978	0.992646	4.54059	4.63469	5.64996	4.95779	0.197634	0.163188	0.262171	0.684534
tca-mir-3851o-2-3p	277	16503	1382	2198	2349	813	2880	3512	3684	2296	2043	1529	1331	182	59	65	55	37	68	82	90	60	29	24	21	3	11.3016	5.89809	2.42593	7.99153	2.99629	3.40848	4.49761	3.83406	0.0916654	0.232156	0.249774	0.437473
tca-mir-3851o-2-5p	239	16503	1382	2198	2349	813	2880	3512	3684	2296	2043	1529	1331	182	20	38	39	13	60	69	74	50	25	15	22	3	0.354439	0.988497	0.814199	0.536698	2.9934	2.68759	3.15284	2.98141	0.103336	0.0278507	0.665125	0.567437
tca-mir-3851k-1-3p	277	16503	1382	2198	2349	813	2880	3512	3684	2296	2043	1529	1331	182	59	65	55	37	68	82	90	60	29	24	21	3	11.3016	5.89809	2.42593	7.99153	2.99629	3.40848	4.49761	3.83406	0.0916654	0.232156	0.249774	0.437473
tca-mir-3851k-1-5p	314	16503	1382	2198	2349	813	2880	3512	3684	2296	2043	1529	1331	182	27	48	51	17	77	87	94	64	30	21	25	3	0.40646	0.878704	0.871992	0.541952	3.2679	2.58981	3.21574	3.25162	0.0315823	0.0283091	0.324096	0.340237
tca-mir-11618b-1-3p	574	16503	1382	2198	2349	813	2880	3512	3684	2296	2043	1529	1331	182	80	102	100	44	134	159	180	110	69	42	44	5	5.68991	3.07166	1.89541	2.846	3.98217	4.07802	6.86822	3.81092	0.241101	0.0247106	0.219706	0.214335
tca-mir-11618b-1-5p	212	16503	1382	2198	2349	813	2880	3512	3684	2296	2043	1529	1331	182	25	30	33	14	60	70	76	52	24	17	16	3	1.50009	0.500629	0.599978	0.992646	4.54059	4.63469	5.64996	4.95779	0.197634	0.163188	0.262171	0.684534
tca-mir-11614-3p	198	16503	1382	2198	2349	813	2880	3512	3684	2296	2043	1529	1331	182	20	35	32	10	49	59	67	44	27	19	13	1	0.807921	1.50606	0.728205	0.414312	2.46156	2.76045	4.17182	3.29707	0.596353	0.424277	0.133894	0.19059
tca-mir-11614-5p	211	16503	1382	2198	2349	813	2880	3512	3684	2296	2043	1529	1331	182	13	22	24	6	50	61	64	42	22	27	22	0	0.0692058	0.0578573	0.0629601	0.0456665	2.09998	2.48381	2.59575	2.22744	0.111455	1.47503	1.0675	0.0433005
tca-mir-3836e-3p	231	16503	1382	2198	2349	813	2880	3512	3684	2296	2043	1529	1331	182	50	54	47	26	41	58	63	35	20	24	22	2	10.0166	5.01579	2.39637	4.55144	0.386098	1.17092	1.50838	0.592306	0.0207933	0.629323	0.764634	0.327848
tca-mir-3836e-5p	250	16503	1382	2198	2349	813	2880	3512	3684	2296	2043	1529	1331	182	31	43	39	20	69	76	87	57	20	11	16	0	1.97805	1.50508	0.630115	1.91448	4.67758	3.60648	5.69784	4.33239	0.00763579	0.00118548	0.0957364	0.0274261
tca-mir-11619e-3p	243	16503	1382	2198	2349	813	2880	3512	3684	2296	2043	1529	1331	182	20	30	31	8	61	77	84	49	31	21	17	2	0.32475	0.199947	0.148091	0.0697752	3.02844	4.29762	5.40276	2.58468	0.41788	0.237804	0.166229	0.297923
tca-mir-11619e-5p	2137	16503	1382	2198	2349	813	2880	3512	3684	2296	2043	1529	1331	182	248	354	364	152	420	547	582	350	257	218	177	21	7.91872	5.77502	4.35839	6.13101	2.68936	6.89902	8.36929	3.63155	0.162134	1.28513	0.484061	0.174535
tca-mir-3836c-3-3p	231	16503	1382	2198	2349	813	2880	3512	3684	2296	2043	1529	1331	182	50	54	47	26	41	58	63	35	20	24	22	2	10.0166	5.01579	2.39637	4.55144	0.386098	1.17092	1.50838	0.592306	0.0207933	0.629323	0.764634	0.327848
tca-mir-3836c-3-5p	212	16503	1382	2198	2349	813	2880	3512	3684	2296	2043	1529	1331	182	22	34	42	14	45	57	57	39	29	20	21	1	0.920231	0.984914	2.01964	0.992646	1.19638	1.69015	1.31877	1.58059	0.614541	0.390199	0.875615	0.166578
tca-mir-11618a-4-3p	160	16503	1382	2198	2349	813	2880	3512	3684	2296	2043	1529	1331	182	19	21	24	13	41	51	60	34	16	14	13	2	1.33755	0.326886	0.469581	1.57319	2.47865	3.21659	5.37865	2.40913	0.105478	0.283355	0.381093	0.586327
tca-mir-11618a-4-5p	212	16503	1382	2198	2349	813	2880	3512	3684	2296	2043	1529	1331	182	25	30	33	14	60	70	76	52	24	17	16	3	1.50009	0.500629	0.599978	0.992646	4.54059	4.63469	5.64996	4.95779	0.197634	0.163188	0.262171	0.684534
tca-mir-3851o-1-3p	277	16503	1382	2198	2349	813	2880	3512	3684	2296	2043	1529	1331	182	59	65	55	37	68	82	90	60	29	24	21	3	11.3016	5.89809	2.42593	7.99153	2.99629	3.40848	4.49761	3.83406	0.0916654	0.232156	0.249774	0.437473
tca-mir-3851o-1-5p	239	16503	1382	2198	2349	813	2880	3512	3684	2296	2043	1529	1331	182	20	38	39	13	60	69	74	50	25	15	22	3	0.354439	0.988497	0.814199	0.536698	2.9934	2.68759	3.15284	2.98141	0.103336	0.0278507	0.665125	0.567437
tca-mir-3851l-2-3p	277	16503	1382	2198	2349	813	2880	3512	3684	2296	2043	1529	1331	182	59	65	55	37	68	82	90	60	29	24	21	3	11.3016	5.89809	2.42593	7.99153	2.99629	3.40848	4.49761	3.83406	0.0916654	0.232156	0.249774	0.437473
tca-mir-3851l-2-5p	314	16503	1382	2198	2349	813	2880	3512	3684	2296	2043	1529	1331	182	27	48	51	17	77	87	94	64	30	21	25	3	0.40646	0.878704	0.871992	0.541952	3.2679	2.58981	3.21574	3.25162	0.0315823	0.0283091	0.324096	0.340237
tca-mir-11618b-2-3p	574	16503	1382	2198	2349	813	2880	3512	3684	2296	2043	1529	1331	182	80	102	100	44	134	159	180	110	69	42	44	5	5.68991	3.07166	1.89541	2.846	3.98217	4.07802	6.86822	3.81092	0.241101	0.0247106	0.219706	0.214335
tca-mir-11618b-2-5p	212	16503	1382	2198	2349	813	2880	3512	3684	2296	2043	1529	1331	182	25	30	33	14	60	70	76	52	24	17	16	3	1.50009	0.500629	0.599978	0.992646	4.54059	4.63469	5.64996	4.95779	0.197634	0.163188	0.262171	0.684534
tca-mir-3836f-3p	231	16503	1382	2198	2349	813	2880	3512	3684	2296	2043	1529	1331	182	50	54	47	26	41	58	63	35	20	24	22	2	10.0166	5.01579	2.39637	4.55144	0.386098	1.17092	1.50838	0.592306	0.0207933	0.629323	0.764634	0.327848
tca-mir-3836f-5p	166	16503	1382	2198	2349	813	2880	3512	3684	2296	2043	1529	1331	182	17	27	26	11	44	48	55	36	18	10	10	0	0.809314	0.958025	0.592186	0.926064	2.91527	2.1238	3.32754	2.66135	0.168625	0.040561	0.100947	0.0742798
tca-mir-11619f-3p	191	16503	1382	2198	2349	813	2880	3512	3684	2296	2043	1529	1331	182	19	26	33	10	42	46	55	27	23	11	18	1	0.752538	0.397147	1.01422	0.46705	1.37048	0.826295	1.84943	0.383556	0.299369	0.0237463	0.697779	0.20395
tca-mir-11619f-5p	250	16503	1382	2198	2349	813	2880	3512	3684	2296	2043	1529	1331	182	25	43	40	18	59	74	82	46	32	19	22	2	0.832207	1.50508	0.735737	1.39018	2.29803	3.1569	4.34016	1.73804	0.427193	0.104194	0.545694	0.281792
tca-mir-11620-3p	90	16503	1382	2198	2349	813	2880	3512	3684	2296	2043	1529	1331	182	7	14	13	3	25	24	24	21	10	9	5	0	0.31484	0.672142	0.393477	0.184873	2.30559	1.06285	0.877863	2.2863	0.247002	0.492757	0.128984	0.199004
tca-mir-11620-5p	238	16503	1382	2198	2349	813	2880	3512	3684	2296	2043	1529	1331	182	21	31	28	8	60	70	77	50	34	17	23	3	0.461391	0.295771	0.0743276	0.0784583	3.04201	2.94885	3.91032	3.02399	0.799174	0.0716198	0.820828	0.571363
tca-mir-11615-3p	167	16503	1382	2198	2349	813	2880	3512	3684	2296	2043	1529	1331	182	18	33	30	11	38	48	46	30	20	19	10	2	0.975988	2.14837	1.15058	0.912301	1.50985	2.07105	1.34481	1.25733	0.296942	0.851555	0.0975217	0.552685
tca-mir-11615-5p	278	16503	1382	2198	2349	813	2880	3512	3684	2296	2043	1529	1331	182	22	42	45	16	68	87	92	55	29	25	20	1	0.254684	0.783808	0.817033	0.674142	2.95192	4.50932	4.93157	2.6073	0.0884897	0.292096	0.183062	0.0890554
tca-mir-3851k-2-3p	277	16503	1382	2198	2349	813	2880	3512	3684	2296	2043	1529	1331	182	59	65	55	37	68	82	90	60	29	24	21	3	11.3016	5.89809	2.42593	7.99153	2.99629	3.40848	4.49761	3.83406	0.0916654	0.232156	0.249774	0.437473
tca-mir-3851k-2-5p	314	16503	1382	2198	2349	813	2880	3512	3684	2296	2043	1529	1331	182	27	48	51	17	77	87	94	64	30	21	25	3	0.40646	0.878704	0.871992	0.541952	3.2679	2.58981	3.21574	3.25162	0.0315823	0.0283091	0.324096	0.340237
tca-mir-11619b-3p	159	16503	1382	2198	2349	813	2880	3512	3684	2296	2043	1529	1331	182	17	24	24	10	41	50	52	37	13	16	11	3	0.932412	0.66845	0.485228	0.791547	2.53242	3.02155	3.0458	3.31825	0.0276121	0.517605	0.195407	1.00293
tca-mir-11621-3p	605	16503	1382	2198	2349	813	2880	3512	3684	2296	2043	1529	1331	182	58	96	104	35	136	163	171	110	73	63	48	2	0.914081	1.54811	1.78598	0.858192	3.2761	3.51552	3.68995	2.93737	0.248645	0.841387	0.292436	0.0153764
tca-mir-11621-5p	665	16503	1382	2198	2349	813	2880	3512	3684	2296	2043	1529	1331	182	93	135	121	50	144	174	190	114	61	69	49	5	6.54768	6.90829	2.80017	2.94062	2.72135	3.04361	4.30326	2.15067	0.0021124	0.850045	0.141456	0.126734
tca-mir-11619a-3-3p	212	16503	1382	2198	2349	813	2880	3512	3684	2296	2043	1529	1331	182	21	31	27	11	51	64	66	38	23	21	11	1	0.76072	0.603782	0.157496	0.452849	2.26224	3.08522	2.97115	1.40085	0.147661	0.495092	0.0321767	0.166578
tca-mir-11619a-3-5p	223	16503	1382	2198	2349	813	2880	3512	3684	2296	2043	1529	1331	182	14	24	20	7	65	63	76	50	22	20	22	1	0.0726945	0.0708081	0.00505995	0.0634369	5.30232	2.28703	4.72992	3.7236	0.0691137	0.298785	0.875937	0.149949
tca-mir-11617a-2-3p	501	16503	1382	2198	2349	813	2880	3512	3684	2296	2043	1529	1331	182	61	82	81	35	116	138	142	98	58	43	47	4	2.92327	1.70455	1.0243	1.81986	3.40651	3.52774	3.24896	3.81471	0.166382	0.173781	0.920558	0.186196
tca-mir-11617a-2-5p	273	16503	1382	2198	2349	813	2880	3512	3684	2296	2043	1529	1331	182	20	39	39	14	62	68	75	47	30	27	30	1	0.160608	0.550485	0.349205	0.432578	1.99305	1.20379	1.74004	1.30197	0.13992	0.503779	1.47807	0.0933585
tca-mir-11622-3p	428	16503	1382	2198	2349	813	2880	3512	3684	2296	2043	1529	1331	182	41	52	54	21	105	119	126	87	45	43	32	6	0.800349	0.131503	0.0887454	0.346901	4.1592	3.3177	3.68704	4.0716	0.0613687	0.595299	0.197994	0.710372
tca-mir-11622-5p	630	16503	1382	2198	2349	813	2880	3512	3684	2296	2043	1529	1331	182	64	119	113	43	147	167	178	113	62	61	47	6	1.34107	4.61193	2.45279	1.90308	4.28137	3.22363	3.80086	2.78525	0.011176	0.487623	0.164886	0.262781
tca-mir-11623-3p	93	16503	1382	2198	2349	813	2880	3512	3684	2296	2043	1529	1331	182	9	8	10	2	23	24	27	17	12	10	12	2	0.601363	0.0521545	0.102921	0.0741228	1.56313	0.930283	1.30399	1.04959	0.438448	0.61743	1.44931	1.07817
tca-mir-11623-5p	94	16503	1382	2198	2349	813	2880	3512	3684	2296	2043	1529	1331	182	7	11	12	5	26	31	28	21	12	11	10	1	0.271839	0.215541	0.229291	0.498017	2.33556	2.54942	1.46407	2.05283	0.42089	0.799094	0.869288	0.556233
tca-mir-3851g-1-3p	277	16503	1382	2198	2349	813	2880	3512	3684	2296	2043	1529	1331	182	59	65	55	37	68	82	90	60	29	24	21	3	11.3016	5.89809	2.42593	7.99153	2.99629	3.40848	4.49761	3.83406	0.0916654	0.232156	0.249774	0.437473
tca-mir-3851g-1-5p	187	16503	1382	2198	2349	813	2880	3512	3684	2296	2043	1529	1331	182	14	24	27	8	49	57	55	37	18	16	17	3	0.21597	0.280073	0.379812	0.238978	3.02632	2.95041	2.04282	2.01362	0.0699416	0.244048	0.601996	0.817281
tca-mir-11624a-1-3p	521	16503	1382	2198	2349	813	2880	3512	3684	2296	2043	1529	1331	182	56	96	97	31	138	151	157	105	51	49	50	4	1.65198	3.47832	2.69708	0.931577	7.21543	5.00225	4.99101	4.57616	0.0161014	0.379048	1.06816	0.16435
tca-mir-11624a-1-5p	544	16503	1382	2198	2349	813	2880	3512	3684	2296	2043	1529	1331	182	43	63	69	18	114	136	144	84	59	59	53	4	0.20771	0.0575872	0.0763156	0.0184208	1.86211	1.82896	2.05685	0.872946	0.0701382	1.05572	1.18849	0.14217
tca-mir-11624a-2-3p	521	16503	1382	2198	2349	813	2880	3512	3684	2296	2043	1529	1331	182	56	96	97	31	138	151	157	105	51	49	50	4	1.65198	3.47832	2.69708	0.931577	7.21543	5.00225	4.99101	4.57616	0.0161014	0.379048	1.06816	0.16435
tca-mir-11624a-2-5p	544	16503	1382	2198	2349	813	2880	3512	3684	2296	2043	1529	1331	182	43	63	69	18	114	136	144	84	59	59	53	4	0.20771	0.0575872	0.0763156	0.0184208	1.86211	1.82896	2.05685	0.872946	0.0701382	1.05572	1.18849	0.14217
tca-mir-3806b-1-3p	508	16503	1382	2198	2349	813	2880	3512	3684	2296	2043	1529	1331	182	40	67	71	18	123	146	165	106	62	48	38	3	0.205612	0.298991	0.271008	0.0373555	4.44987	4.65789	7.48751	5.29785	0.288396	0.393048	0.185769	0.0885436
tca-mir-3806b-1-5p	235	16503	1382	2198	2349	813	2880	3512	3684	2296	2043	1529	1331	182	15	37	35	8	59	72	82	47	33	14	19	2	0.0760033	0.932237	0.464573	0.0841175	2.95834	3.57427	5.47823	2.43951	0.725865	0.019331	0.361706	0.317539
tca-mir-11624a-3-3p	521	16503	1382	2198	2349	813	2880	3512	3684	2296	2043	1529	1331	182	56	96	97	31	138	151	157	105	51	49	50	4	1.65198	3.47832	2.69708	0.931577	7.21543	5.00225	4.99101	4.57616	0.0161014	0.379048	1.06816	0.16435
tca-mir-11624a-3-5p	544	16503	1382	2198	2349	813	2880	3512	3684	2296	2043	1529	1331	182	43	63	69	18	114	136	144	84	59	59	53	4	0.20771	0.0575872	0.0763156	0.0184208	1.86211	1.82896	2.05685	0.872946	0.0701382	1.05572	1.18849	0.14217
tca-mir-309c-3p	231	16503	1382	2198	2349	813	2880	3512	3684	2296	2043	1529	1331	182	50	54	47	26	41	58	63	35	20	24	22	2	10.0166	5.01579	2.39637	4.55144	0.386098	1.17092	1.50838	0.592306	0.0207933	0.629323	0.764634	0.327848
tca-mir-309c-5p	1161	16503	1382	2198	2349	813	2880	3512	3684	2296	2043	1529	1331	182	122	178	194	71	241	305	324	193	139	111	99	9	2.4585	1.75557	2.21024	1.60485	2.95471	4.96613	5.80815	2.53224	0.187875	0.473497	0.595757	0.0799011
tca-mir-11624b-1-3p	241	16503	1382	2198	2349	813	2880	3512	3684	2296	2043	1529	1331	182	18	29	36	11	52	71	68	44	29	20	30	2	0.191723	0.164971	0.474758	0.278169	1.39793	3.00079	1.90071	1.63923	0.286751	0.187374	2.18629	0.302705
tca-mir-11624b-1-5p	544	16503	1382	2198	2349	813	2880	3512	3684	2296	2043	1529	1331	182	43	63	69	18	114	136	144	84	59	59	53	4	0.20771	0.0575872	0.0763156	0.0184208	1.86211	1.82896	2.05685	0.872946	0.0701382	1.05572	1.18849	0.14217
tca-mir-3851h-3p	209	16503	1382	2198	2349	813	2880	3512	3684	2296	2043	1529	1331	182	44	44	36	24	43	57	71	37	19	16	17	0	8.55008	3.17598	1.03666	4.42714	0.997043	1.81436	4.42851	1.31129	0.0385752	0.125662	0.375363	0.0443362
tca-mir-3851h-5p	187	16503	1382	2198	2349	813	2880	3512	3684	2296	2043	1529	1331	182	14	24	27	8	49	57	55	37	18	16	17	3	0.21597	0.280073	0.379812	0.238978	3.02632	2.95041	2.04282	2.01362	0.0699416	0.244048	0.601996	0.817281
tca-mir-11624d-3p	241	16503	1382	2198	2349	813	2880	3512	3684	2296	2043	1529	1331	182	18	29	36	11	52	71	68	44	29	20	30	2	0.191723	0.164971	0.474758	0.278169	1.39793	3.00079	1.90071	1.63923	0.286751	0.187374	2.18629	0.302705
tca-mir-11624d-5p	312	16503	1382	2198	2349	813	2880	3512	3684	2296	2043	1529	1331	182	27	34	43	13	81	88	88	61	36	29	27	4	0.421488	0.0534558	0.258202	0.168269	4.27227	2.85953	2.24003	2.6753	0.195905	0.353205	0.516542	0.582006
tca-mir-3851i-3p	209	16503	1382	2198	2349	813	2880	3512	3684	2296	2043	1529	1331	182	44	44	36	24	43	57	71	37	19	16	17	0	8.55008	3.17598	1.03666	4.42714	0.997043	1.81436	4.42851	1.31129	0.0385752	0.125662	0.375363	0.0443362
tca-mir-3851i-5p	255	16503	1382	2198	2349	813	2880	3512	3684	2296	2043	1529	1331	182	14	29	31	7	67	83	77	56	22	27	26	0	0.0236849	0.0998955	0.0939506	0.0275746	3.85241	5.04811	2.89677	3.80358	0.0161269	0.70537	1.0547	0.0258787
tca-mir-3851j-3p	276	16503	1382	2198	2349	813	2880	3512	3684	2296	2043	1529	1331	182	56	58	50	31	64	82	99	59	27	23	18	1	9.90682	3.87894	1.54152	5.20612	2.24217	3.46335	7.07315	3.62219	0.049173	0.180833	0.098753	0.0907522
tca-mir-3851j-5p	529	16503	1382	2198	2349	813	2880	3512	3684	2296	2043	1529	1331	182	35	69	70	21	123	153	149	95	53	51	53	3	0.0347053	0.264672	0.13968	0.0844091	3.64383	5.00381	3.24184	2.47409	0.0226753	0.460736	1.36883	0.0760802
tca-mir-11625a-3p	1341	16503	1382	2198	2349	813	2880	3512	3684	2296	2043	1529	1331	182	186	266	277	120	302	369	392	243	132	97	88	8	12.1918	11.8733	11.0787	10.5173	6.51494	8.20634	9.52751	5.53859	0.000640226	0.00150141	0.00782982	0.0155429
tca-mir-11625a-5p	292	16503	1382	2198	2349	813	2880	3512	3684	2296	2043	1529	1331	182	37	54	54	20	58	78	73	47	36	34	32	4	2.36442	2.33493	1.77237	1.27131	0.915764	1.97723	0.920714	0.91485	0.331373	1.16408	1.51501	0.655708
tca-mir-11626a-3p	288	16503	1382	2198	2349	813	2880	3512	3684	2296	2043	1529	1331	182	24	43	42	17	72	84	88	54	29	28	31	0	0.341076	0.7375	0.406903	0.746501	3.36569	3.24552	3.37718	2.07614	0.0614831	0.460625	1.39718	0.0176714
tca-mir-11626a-5p	143	16503	1382	2198	2349	813	2880	3512	3684	2296	2043	1529	1331	182	17	20	20	12	32	41	47	28	16	14	8	0	1.27525	0.455832	0.323518	1.61367	1.291	1.86133	2.88763	1.6524	0.215142	0.460753	0.0839015	0.0987456
tca-mir-11626b-3p	288	16503	1382	2198	2349	813	2880	3512	3684	2296	2043	1529	1331	182	24	43	42	17	72	84	88	54	29	28	31	0	0.341076	0.7375	0.406903	0.746501	3.36569	3.24552	3.37718	2.07614	0.0614831	0.460625	1.39718	0.0176714
tca-mir-11626b-5p	212	16503	1382	2198	2349	813	2880	3512	3684	2296	2043	1529	1331	182	17	26	29	9	52	65	72	43	26	18	19	2	0.291001	0.200743	0.264291	0.220632	2.47554	3.32097	4.47333	2.41647	0.32936	0.224911	0.578594	0.381884
tca-mir-3806b-2-3p	508	16503	1382	2198	2349	813	2880	3512	3684	2296	2043	1529	1331	182	40	67	71	18	123	146	165	106	62	48	38	3	0.205612	0.298991	0.271008	0.0373555	4.44987	4.65789	7.48751	5.29785	0.288396	0.393048	0.185769	0.0885436
tca-mir-3806b-2-5p	235	16503	1382	2198	2349	813	2880	3512	3684	2296	2043	1529	1331	182	15	37	35	8	59	72	82	47	33	14	19	2	0.0760033	0.932237	0.464573	0.0841175	2.95834	3.57427	5.47823	2.43951	0.725865	0.019331	0.361706	0.317539
tca-mir-11624c-3p	521	16503	1382	2198	2349	813	2880	3512	3684	2296	2043	1529	1331	182	56	96	97	31	138	151	157	105	51	49	50	4	1.65198	3.47832	2.69708	0.931577	7.21543	5.00225	4.99101	4.57616	0.0161014	0.379048	1.06816	0.16435
tca-mir-11624c-5p	544	16503	1382	2198	2349	813	2880	3512	3684	2296	2043	1529	1331	182	43	63	69	18	114	136	144	84	59	59	53	4	0.20771	0.0575872	0.0763156	0.0184208	1.86211	1.82896	2.05685	0.872946	0.0701382	1.05572	1.18849	0.14217
tca-mir-11627-3p	464	16503	1382	2198	2349	813	2880	3512	3684	2296	2043	1529	1331	182	36	67	66	19	93	118	122	73	58	55	39	7	0.188	0.671693	0.328345	0.117412	1.20711	1.89465	1.75616	0.946836	0.363177	1.61737	0.453043	0.848393
tca-mir-11627-5p	157	16503	1382	2198	2349	813	2880	3512	3684	2296	2043	1529	1331	182	14	22	22	7	39	52	51	32	13	14	8	2	0.474264	0.462371	0.323062	0.290267	2.15146	3.72214	2.92949	2.03479	0.0309203	0.309587	0.0482441	0.601469
tca-mir-11628-3p	216	16503	1382	2198	2349	813	2880	3512	3684	2296	2043	1529	1331	182	23	32	36	14	52	60	67	42	28	21	16	2	1.02695	0.652052	0.883845	0.942693	2.29797	2.04647	2.95682	2.04567	0.457103	0.45286	0.237534	0.369767
tca-mir-11628-5p	2357	16503	1382	2198	2349	813	2880	3512	3684	2296	2043	1529	1331	182	247	396	403	138	511	638	670	413	267	221	179	17	4.34856	7.14998	4.95707	1.92171	8.31398	12.7285	13.6024	7.37499	0.0219738	0.395172	0.0935875	0.0133161
tca-mir-11629-3p	1167	16503	1382	2198	2349	813	2880	3512	3684	2296	2043	1529	1331	182	117	180	188	67	234	304	328	198	131	119	101	11	1.77338	1.86307	1.56471	1.08372	2.12488	4.64078	6.18273	3.00948	0.05305	0.929517	0.690301	0.19265
tca-mir-11629-5p	1393	16503	1382	2198	2349	813	2880	3512	3684	2296	2043	1529	1331	182	142	223	225	73	321	390	409	252	150	137	119	16	2.27025	2.95868	1.8061	0.583498	7.96136	9.67346	10.2113	5.6667	0.0129641	0.685114	0.639466	0.434435
tca-mir-11630-3p	1500	16503	1382	2198	2349	813	2880	3512	3684	2296	2043	1529	1331	182	140	231	259	86	305	387	401	236	184	140	127	14	1.12842	2.19225	3.60782	1.22321	2.96882	5.32113	4.98138	1.80106	0.27103	0.357185	0.591459	0.159345
tca-mir-11630-5p	370	16503	1382	2198	2349	813	2880	3512	3684	2296	2043	1529	1331	182	38	60	59	24	94	108	106	76	37	30	27	3	1.09618	1.35467	0.818301	1.16336	4.41718	3.94802	2.78479	3.81314	0.0408361	0.125216	0.175979	0.232419
tca-mir-3851n-2-3p	277	16503	1382	2198	2349	813	2880	3512	3684	2296	2043	1529	1331	182	59	65	55	37	68	82	90	60	29	24	21	3	11.3016	5.89809	2.42593	7.99153	2.99629	3.40848	4.49761	3.83406	0.0916654	0.232156	0.249774	0.437473
tca-mir-3851n-2-5p	314	16503	1382	2198	2349	813	2880	3512	3684	2296	2043	1529	1331	182	27	48	51	17	77	87	94	64	30	21	25	3	0.40646	0.878704	0.871992	0.541952	3.2679	2.58981	3.21574	3.25162	0.0315823	0.0283091	0.324096	0.340237
tca-mir-3851l-3-3p	277	16503	1382	2198	2349	813	2880	3512	3684	2296	2043	1529	1331	182	59	65	55	37	68	82	90	60	29	24	21	3	11.3016	5.89809	2.42593	7.99153	2.99629	3.40848	4.49761	3.83406	0.0916654	0.232156	0.249774	0.437473
tca-mir-3851l-3-5p	314	16503	1382	2198	2349	813	2880	3512	3684	2296	2043	1529	1331	182	27	48	51	17	77	87	94	64	30	21	25	3	0.40646	0.878704	0.871992	0.541952	3.2679	2.58981	3.21574	3.25162	0.0315823	0.0283091	0.324096	0.340237
tca-mir-3851k-3-3p	277	16503	1382	2198	2349	813	2880	3512	3684	2296	2043	1529	1331	182	59	65	55	37	68	82	90	60	29	24	21	3	11.3016	5.89809	2.42593	7.99153	2.99629	3.40848	4.49761	3.83406	0.0916654	0.232156	0.249774	0.437473
tca-mir-3851k-3-5p	314	16503	1382	2198	2349	813	2880	3512	3684	2296	2043	1529	1331	182	27	48	51	17	77	87	94	64	30	21	25	3	0.40646	0.878704	0.871992	0.541952	3.2679	2.58981	3.21574	3.25162	0.0315823	0.0283091	0.324096	0.340237
tca-mir-11618b-3-3p	574	16503	1382	2198	2349	813	2880	3512	3684	2296	2043	1529	1331	182	80	102	100	44	134	159	180	110	69	42	44	5	5.68991	3.07166	1.89541	2.846	3.98217	4.07802	6.86822	3.81092	0.241101	0.0247106	0.219706	0.214335
tca-mir-11618b-3-5p	212	16503	1382	2198	2349	813	2880	3512	3684	2296	2043	1529	1331	182	25	30	33	14	60	70	76	52	24	17	16	3	1.50009	0.500629	0.599978	0.992646	4.54059	4.63469	5.64996	4.95779	0.197634	0.163188	0.262171	0.684534
tca-mir-11618a-3-3p	241	16503	1382	2198	2349	813	2880	3512	3684	2296	2043	1529	1331	182	28	35	37	16	62	71	69	48	26	22	25	2	1.51773	0.595591	0.565821	1.05776	3.36311	3.00079	2.07042	2.43695	0.130799	0.325215	1.10551	0.302705
tca-mir-11618a-3-5p	212	16503	1382	2198	2349	813	2880	3512	3684	2296	2043	1529	1331	182	25	30	33	14	60	70	76	52	24	17	16	3	1.50009	0.500629	0.599978	0.992646	4.54059	4.63469	5.64996	4.95779	0.197634	0.163188	0.262171	0.684534
tca-mir-3806b-3-3p	508	16503	1382	2198	2349	813	2880	3512	3684	2296	2043	1529	1331	182	40	67	71	18	123	146	165	106	62	48	38	3	0.205612	0.298991	0.271008	0.0373555	4.44987	4.65789	7.48751	5.29785	0.288396	0.393048	0.185769	0.0885436
tca-mir-3806b-3-5p	235	16503	1382	2198	2349	813	2880	3512	3684	2296	2043	1529	1331	182	15	37	35	8	59	72	82	47	33	14	19	2	0.0760033	0.932237	0.464573	0.0841175	2.95834	3.57427	5.47823	2.43951	0.725865	0.019331	0.361706	0.317539
tca-mir-3851m-3-3p	277	16503	1382	2198	2349	813	2880	3512	3684	2296	2043	1529	1331	182	59	65	55	37	68	82	90	60	29	24	21	3	11.3016	5.89809	2.42593	7.99153	2.99629	3.40848	4.49761	3.83406	0.0916654	0.232156	0.249774	0.437473
tca-mir-3851m-3-5p	314	16503	1382	2198	2349	813	2880	3512	3684	2296	2043	1529	1331	182	27	48	51	17	77	87	94	64	30	21	25	3	0.40646	0.878704	0.871992	0.541952	3.2679	2.58981	3.21574	3.25162	0.0315823	0.0283091	0.324096	0.340237
tca-mir-11617a-3-3p	329	16503	1382	2198	2349	813	2880	3512	3684	2296	2043	1529	1331	182	43	49	51	28	79	92	96	67	33	26	31	0	2.88073	0.756643	0.646226	2.74311	3.04025	2.82653	2.86523	3.35361	0.0499249	0.110865	0.810087	0.011034
tca-mir-11617a-3-5p	273	16503	1382	2198	2349	813	2880	3512	3684	2296	2043	1529	1331	182	20	39	39	14	62	68	75	47	30	27	30	1	0.160608	0.550485	0.349205	0.432578	1.99305	1.20379	1.74004	1.30197	0.13992	0.503779	1.47807	0.0933585
tca-mir-11619a-1-3p	334	16503	1382	2198	2349	813	2880	3512	3684	2296	2043	1529	1331	182	34	41	38	17	88	106	117	73	32	36	25	0	1.00458	0.166789	0.0330455	0.418373	4.82806	5.60503	7.51058	4.60806	0.0292531	0.838036	0.21817	0.0104196
tca-mir-11619a-1-5p	223	16503	1382	2198	2349	813	2880	3512	3684	2296	2043	1529	1331	182	14	24	20	7	65	63	76	50	22	20	22	1	0.0726945	0.0708081	0.00505995	0.0634369	5.30232	2.28703	4.72992	3.7236	0.0691137	0.298785	0.875937	0.149949
tca-mir-3851m-2-3p	277	16503	1382	2198	2349	813	2880	3512	3684	2296	2043	1529	1331	182	59	65	55	37	68	82	90	60	29	24	21	3	11.3016	5.89809	2.42593	7.99153	2.99629	3.40848	4.49761	3.83406	0.0916654	0.232156	0.249774	0.437473
tca-mir-3851m-2-5p	314	16503	1382	2198	2349	813	2880	3512	3684	2296	2043	1529	1331	182	27	48	51	17	77	87	94	64	30	21	25	3	0.40646	0.878704	0.871992	0.541952	3.2679	2.58981	3.21574	3.25162	0.0315823	0.0283091	0.324096	0.340237
tca-mir-11618a-5-3p	241	16503	1382	2198	2349	813	2880	3512	3684	2296	2043	1529	1331	182	28	35	37	16	62	71	69	48	26	22	25	2	1.51773	0.595591	0.565821	1.05776	3.36311	3.00079	2.07042	2.43695	0.130799	0.325215	1.10551	0.302705
tca-mir-11618a-5-5p	212	16503	1382	2198	2349	813	2880	3512	3684	2296	2043	1529	1331	182	25	30	33	14	60	70	76	52	24	17	16	3	1.50009	0.500629	0.599978	0.992646	4.54059	4.63469	5.64996	4.95779	0.197634	0.163188	0.262171	0.684534
tca-mir-11618b-4-3p	574	16503	1382	2198	2349	813	2880	3512	3684	2296	2043	1529	1331	182	80	102	100	44	134	159	180	110	69	42	44	5	5.68991	3.07166	1.89541	2.846	3.98217	4.07802	6.86822	3.81092	0.241101	0.0247106	0.219706	0.214335
tca-mir-11618b-4-5p	212	16503	1382	2198	2349	813	2880	3512	3684	2296	2043	1529	1331	182	25	30	33	14	60	70	76	52	24	17	16	3	1.50009	0.500629	0.599978	0.992646	4.54059	4.63469	5.64996	4.95779	0.197634	0.163188	0.262171	0.684534
tca-mir-3851k-4-3p	277	16503	1382	2198	2349	813	2880	3512	3684	2296	2043	1529	1331	182	59	65	55	37	68	82	90	60	29	24	21	3	11.3016	5.89809	2.42593	7.99153	2.99629	3.40848	4.49761	3.83406	0.0916654	0.232156	0.249774	0.437473
tca-mir-3851k-4-5p	314	16503	1382	2198	2349	813	2880	3512	3684	2296	2043	1529	1331	182	27	48	51	17	77	87	94	64	30	21	25	3	0.40646	0.878704	0.871992	0.541952	3.2679	2.58981	3.21574	3.25162	0.0315823	0.0283091	0.324096	0.340237
tca-mir-11619a-2-3p	334	16503	1382	2198	2349	813	2880	3512	3684	2296	2043	1529	1331	182	34	41	38	17	88	106	117	73	32	36	25	0	1.00458	0.166789	0.0330455	0.418373	4.82806	5.60503	7.51058	4.60806	0.0292531	0.838036	0.21817	0.0104196
tca-mir-11619a-2-5p	223	16503	1382	2198	2349	813	2880	3512	3684	2296	2043	1529	1331	182	14	24	20	7	65	63	76	50	22	20	22	1	0.0726945	0.0708081	0.00505995	0.0634369	5.30232	2.28703	4.72992	3.7236	0.0691137	0.298785	0.875937	0.149949
tca-mir-11617a-4-3p	329	16503	1382	2198	2349	813	2880	3512	3684	2296	2043	1529	1331	182	43	49	51	28	79	92	96	67	33	26	31	0	2.88073	0.756643	0.646226	2.74311	3.04025	2.82653	2.86523	3.35361	0.0499249	0.110865	0.810087	0.011034
tca-mir-11617a-4-5p	273	16503	1382	2198	2349	813	2880	3512	3684	2296	2043	1529	1331	182	20	39	39	14	62	68	75	47	30	27	30	1	0.160608	0.550485	0.349205	0.432578	1.99305	1.20379	1.74004	1.30197	0.13992	0.503779	1.47807	0.0933585
tca-mir-11618a-2-3p	160	16503	1382	2198	2349	813	2880	3512	3684	2296	2043	1529	1331	182	19	21	24	13	41	51	60	34	16	14	13	2	1.33755	0.326886	0.469581	1.57319	2.47865	3.21659	5.37865	2.40913	0.105478	0.283355	0.381093	0.586327
tca-mir-11618a-2-5p	212	16503	1382	2198	2349	813	2880	3512	3684	2296	2043	1529	1331	182	25	30	33	14	60	70	76	52	24	17	16	3	1.50009	0.500629	0.599978	0.992646	4.54059	4.63469	5.64996	4.95779	0.197634	0.163188	0.262171	0.684534
tca-mir-3806b-4-3p	508	16503	1382	2198	2349	813	2880	3512	3684	2296	2043	1529	1331	182	40	67	71	18	123	146	165	106	62	48	38	3	0.205612	0.298991	0.271008	0.0373555	4.44987	4.65789	7.48751	5.29785	0.288396	0.393048	0.185769	0.0885436
tca-mir-3806b-4-5p	235	16503	1382	2198	2349	813	2880	3512	3684	2296	2043	1529	1331	182	15	37	35	8	59	72	82	47	33	14	19	2	0.0760033	0.932237	0.464573	0.0841175	2.95834	3.57427	5.47823	2.43951	0.725865	0.019331	0.361706	0.317539
tca-mir-971b-3p	511	16503	1382	2198	2349	813	2880	3512	3684	2296	2043	1529	1331	182	59	79	83	36	114	129	136	92	53	60	48	2	2.32725	1.17134	1.07094	1.90387	2.74801	1.90286	2.06195	2.45131	0.0405888	1.62688	0.934936	0.0343478
tca-mir-971b-5p	555	16503	1382	2198	2349	813	2880	3512	3684	2296	2043	1529	1331	182	58	77	82	24	132	149	165	102	66	54	46	1	1.47283	0.494249	0.483413	0.149953	4.32414	3.20669	4.83665	2.93554	0.21582	0.49762	0.415519	0.00618542
tca-mir-11619c-3p	334	16503	1382	2198	2349	813	2880	3512	3684	2296	2043	1529	1331	182	34	41	38	17	88	106	117	73	32	36	25	0	1.00458	0.166789	0.0330455	0.418373	4.82806	5.60503	7.51058	4.60806	0.0292531	0.838036	0.21817	0.0104196
tca-mir-11619c-5p	152	16503	1382	2198	2349	813	2880	3512	3684	2296	2043	1529	1331	182	14	25	19	8	39	41	43	29	17	9	19	1	0.53591	0.973586	0.165393	0.475988	2.40863	1.43019	1.47747	1.54234	0.209615	0.0426059	1.69347	0.299724
tca-mir-11619d-3p	612	16503	1382	2198	2349	813	2880	3512	3684	2296	2043	1529	1331	182	53	89	89	33	130	172	183	103	62	63	47	6	0.440534	0.779604	0.415077	0.590537	2.22759	4.72651	5.44889	1.79065	0.020358	0.778188	0.219156	0.288101
tca-mir-11619d-5p	264	16503	1382	2198	2349	813	2880	3512	3684	2296	2043	1529	1331	182	24	46	43	10	53	68	77	44	28	24	18	1	0.539514	1.65261	0.833348	0.120681	0.944345	1.47935	2.44758	1.07359	0.106755	0.314012	0.135758	0.10164
tca-mir-3851q-3p	279	16503	1382	2198	2349	813	2880	3512	3684	2296	2043	1529	1331	182	34	50	47	18	63	80	83	52	35	27	28	4	1.98141	1.9559	1.0387	1.01619	1.95853	2.89245	2.84656	1.97651	0.375042	0.447885	1.02257	0.708745
tca-mir-3851q-5p	239	16503	1382	2198	2349	813	2880	3512	3684	2296	2043	1529	1331	182	20	42	33	9	52	57	68	45	27	22	26	3	0.354439	1.62633	0.275753	0.127468	1.45793	0.836871	1.98581	1.88539	0.185303	0.340715	1.32825	0.567437
tca-mir-11625b-3p	1341	16503	1382	2198	2349	813	2880	3512	3684	2296	2043	1529	1331	182	186	266	277	120	302	369	392	243	132	97	88	8	12.1918	11.8733	11.0787	10.5173	6.51494	8.20634	9.52751	5.53859	0.000640226	0.00150141	0.00782982	0.0155429
tca-mir-11625b-5p	292	16503	1382	2198	2349	813	2880	3512	3684	2296	2043	1529	1331	182	37	54	54	20	58	78	73	47	36	34	32	4	2.36442	2.33493	1.77237	1.27131	0.915764	1.97723	0.920714	0.91485	0.331373	1.16408	1.51501	0.655708
tca-mir-3851g-2-3p	188	16503	1382	2198	2349	813	2880	3512	3684	2296	2043	1529	1331	182	17	30	26	9	44	51	50	36	15	17	10	0	0.507265	0.917786	0.290789	0.348694	1.84383	1.65596	1.16288	1.76206	0.0159622	0.320317	0.0456032	0.0569252
tca-mir-3851g-2-5p	187	16503	1382	2198	2349	813	2880	3512	3684	2296	2043	1529	1331	182	14	24	27	8	49	57	55	37	18	16	17	3	0.21597	0.280073	0.379812	0.238978	3.02632	2.95041	2.04282	2.01362	0.0699416	0.244048	0.601996	0.817281
tca-mir-11631-3p	131	16503	1382	2198	2349	813	2880	3512	3684	2296	2043	1529	1331	182	11	19	23	7	29	33	35	23	15	11	9	2	0.379979	0.5369	0.944354	0.497521	1.18025	0.937047	1.01868	1.02768	0.249436	0.251204	0.208322	0.754279
tca-mir-11631-5p	141	16503	1382	2198	2349	813	2880	3512	3684	2296	2043	1529	1331	182	17	21	23	10	36	40	47	29	22	15	8	2	1.32496	0.612567	0.69775	1.05312	2.24934	1.75648	3.03613	1.97279	0.997441	0.633383	0.0905633	0.6905
tca-mir-3851d-1-3p	209	16503	1382	2198	2349	813	2880	3512	3684	2296	2043	1529	1331	182	44	44	36	24	43	57	71	37	19	16	17	0	8.55008	3.17598	1.03666	4.42714	0.997043	1.81436	4.42851	1.31129	0.0385752	0.125662	0.375363	0.0443362
tca-mir-3851d-1-5p	187	16503	1382	2198	2349	813	2880	3512	3684	2296	2043	1529	1331	182	14	24	27	8	49	57	55	37	18	16	17	3	0.21597	0.280073	0.379812	0.238978	3.02632	2.95041	2.04282	2.01362	0.0699416	0.244048	0.601996	0.817281
tca-mir-3858a-2-3p	605	16503	1382	2198	2349	813	2880	3512	3684	2296	2043	1529	1331	182	43	80	84	20	144	182	180	113	67	65	42	3	0.0661091	0.302504	0.243433	0.0141839	4.66227	7.06461	5.22549	3.4407	0.084379	1.04239	0.0806368	0.0433752
tca-mir-3858a-2-5p	258	16503	1382	2198	2349	813	2880	3512	3684	2296	2043	1529	1331	182	19	41	49	14	65	77	85	51	20	13	11	0	0.170894	1.01739	1.87804	0.53573	3.21666	3.36934	4.5453	2.4683	0.00486299	0.00357289	0.0047997	0.0249935
tca-mir-3851d-2-3p	209	16503	1382	2198	2349	813	2880	3512	3684	2296	2043	1529	1331	182	44	44	36	24	43	57	71	37	19	16	17	0	8.55008	3.17598	1.03666	4.42714	0.997043	1.81436	4.42851	1.31129	0.0385752	0.125662	0.375363	0.0443362
tca-mir-3851d-2-5p	257	16503	1382	2198	2349	813	2880	3512	3684	2296	2043	1529	1331	182	22	39	41	6	63	76	79	46	26	22	27	1	0.396934	0.784375	0.72877	0.0121942	2.82016	3.20618	3.20332	1.54227	0.0730203	0.220661	1.19708	0.108591
tca-mir-11617b-3p	790	16503	1382	2198	2349	813	2880	3512	3684	2296	2043	1529	1331	182	97	141	146	53	156	198	219	129	88	84	70	7	4.32834	4.04997	3.53439	2.03728	1.41681	2.41051	3.95349	1.67382	0.0712953	1.09892	0.742436	0.188577
tca-mir-11617b-5p	322	16503	1382	2198	2349	813	2880	3512	3684	2296	2043	1529	1331	182	30	49	44	21	81	103	114	66	33	31	26	4	0.634055	0.862239	0.238039	1.11791	3.77395	5.64546	7.63165	3.39712	0.0642084	0.438133	0.351139	0.548388
tca-mir-3858b-3p	605	16503	1382	2198	2349	813	2880	3512	3684	2296	2043	1529	1331	182	43	80	84	20	144	182	180	113	67	65	42	3	0.0661091	0.302504	0.243433	0.0141839	4.66227	7.06461	5.22549	3.4407	0.084379	1.04239	0.0806368	0.0433752
tca-mir-3858b-5p	226	16503	1382	2198	2349	813	2880	3512	3684	2296	2043	1529	1331	182	8	29	28	5	54	70	70	42	24	25	15	4	0.00124544	0.269333	0.121779	0.0135347	2.28425	3.65414	3.03252	1.71723	0.121256	0.834468	0.129101	0.977569
tca-mir-11632-3p	322	16503	1382	2198	2349	813	2880	3512	3684	2296	2043	1529	1331	182	30	49	44	21	81	103	114	66	33	31	26	4	0.634055	0.862239	0.238039	1.11791	3.77395	5.64546	7.63165	3.39712	0.0642084	0.438133	0.351139	0.548388
tca-mir-11632-5p	243	16503	1382	2198	2349	813	2880	3512	3684	2296	2043	1529	1331	182	27	33	34	13	52	72	70	50	35	23	25	6	1.28024	0.391284	0.302837	0.506182	1.3398	3.10767	2.15633	2.81583	0.84067	0.395565	1.07289	1.73608
tca-mir-11633-3p	128	16503	1382	2198	2349	813	2880	3512	3684	2296	2043	1529	1331	182	12	18	18	7	35	36	41	29	17	15	9	2	0.561842	0.465442	0.337479	0.528605	2.74555	1.59751	2.39722	2.60732	0.496983	0.873183	0.22974	0.774821
tca-mir-11633-5p	260	16503	1382	2198	2349	813	2880	3512	3684	2296	2043	1529	1331	182	25	31	33	12	76	96	93	62	31	19	20	4	0.704406	0.147195	0.136275	0.285105	6.08573	8.70964	6.64015	5.28616	0.265356	0.0762954	0.275247	0.794553
tca-mir-3836g-1-3p	231	16503	1382	2198	2349	813	2880	3512	3684	2296	2043	1529	1331	182	50	54	47	26	41	58	63	35	20	24	22	2	10.0166	5.01579	2.39637	4.55144	0.386098	1.17092	1.50838	0.592306	0.0207933	0.629323	0.764634	0.327848
tca-mir-3836g-1-5p	159	16503	1382	2198	2349	813	2880	3512	3684	2296	2043	1529	1331	182	12	23	19	8	44	48	56	36	17	15	15	2	0.238116	0.543306	0.120133	0.416382	3.34534	2.52317	4.17298	3.01634	0.158846	0.394941	0.673644	0.591324
tca-mir-3836g-2-3p	231	16503	1382	2198	2349	813	2880	3512	3684	2296	2043	1529	1331	182	50	54	47	26	41	58	63	35	20	24	22	2	10.0166	5.01579	2.39637	4.55144	0.386098	1.17092	1.50838	0.592306	0.0207933	0.629323	0.764634	0.327848
tca-mir-3836g-2-5p	159	16503	1382	2198	2349	813	2880	3512	3684	2296	2043	1529	1331	182	12	23	19	8	44	48	56	36	17	15	15	2	0.238116	0.543306	0.120133	0.416382	3.34534	2.52317	4.17298	3.01634	0.158846	0.394941	0.673644	0.591324
tca-mir-3851m-4-3p	277	16503	1382	2198	2349	813	2880	3512	3684	2296	2043	1529	1331	182	59	65	55	37	68	82	90	60	29	24	21	3	11.3016	5.89809	2.42593	7.99153	2.99629	3.40848	4.49761	3.83406	0.0916654	0.232156	0.249774	0.437473
tca-mir-3851m-4-5p	314	16503	1382	2198	2349	813	2880	3512	3684	2296	2043	1529	1331	182	27	48	51	17	77	87	94	64	30	21	25	3	0.40646	0.878704	0.871992	0.541952	3.2679	2.58981	3.21574	3.25162	0.0315823	0.0283091	0.324096	0.340237
tca-mir-3851r-3p	277	16503	1382	2198	2349	813	2880	3512	3684	2296	2043	1529	1331	182	59	65	55	37	68	82	90	60	29	24	21	3	11.3016	5.89809	2.42593	7.99153	2.99629	3.40848	4.49761	3.83406	0.0916654	0.232156	0.249774	0.437473
tca-mir-3851r-5p	314	16503	1382	2198	2349	813	2880	3512	3684	2296	2043	1529	1331	182	27	48	51	17	77	87	94	64	30	21	25	3	0.40646	0.878704	0.871992	0.541952	3.2679	2.58981	3.21574	3.25162	0.0315823	0.0283091	0.324096	0.340237
tca-mir-3836c-4-3p	231	16503	1382	2198	2349	813	2880	3512	3684	2296	2043	1529	1331	182	50	54	47	26	41	58	63	35	20	24	22	2	10.0166	5.01579	2.39637	4.55144	0.386098	1.17092	1.50838	0.592306	0.0207933	0.629323	0.764634	0.327848
tca-mir-3836c-4-5p	212	16503	1382	2198	2349	813	2880	3512	3684	2296	2043	1529	1331	182	22	34	42	14	45	57	57	39	29	20	21	1	0.920231	0.984914	2.01964	0.992646	1.19638	1.69015	1.31877	1.58059	0.614541	0.390199	0.875615	0.166578
tca-mir-11634-3p	101	16503	1382	2198	2349	813	2880	3512	3684	2296	2043	1529	1331	182	7	14	13	5	22	29	33	20	11	6	8	0	0.209091	0.435317	0.231904	0.4207	0.988984	1.5406	2.23539	1.43686	0.217506	0.0769227	0.367924	0.170792
tca-mir-11634-5p	305	16503	1382	2198	2349	813	2880	3512	3684	2296	2043	1529	1331	182	27	34	44	12	79	90	88	60	31	31	26	4	0.477596	0.0697023	0.375233	0.128937	4.1521	3.60554	2.53712	2.70984	0.0629252	0.594863	0.475492	0.606781
tca-mir-3851l-1-3p	277	16503	1382	2198	2349	813	2880	3512	3684	2296	2043	1529	1331	182	59	65	55	37	68	82	90	60	29	24	21	3	11.3016	5.89809	2.42593	7.99153	2.99629	3.40848	4.49761	3.83406	0.0916654	0.232156	0.249774	0.437473
tca-mir-3851l-1-5p	314	16503	1382	2198	2349	813	2880	3512	3684	2296	2043	1529	1331	182	27	48	51	17	77	87	94	64	30	21	25	3	0.40646	0.878704	0.871992	0.541952	3.2679	2.58981	3.21574	3.25162	0.0315823	0.0283091	0.324096	0.340237
tca-mir-3836c-5-3p	231	16503	1382	2198	2349	813	2880	3512	3684	2296	2043	1529	1331	182	50	54	47	26	41	58	63	35	20	24	22	2	10.0166	5.01579	2.39637	4.55144	0.386098	1.17092	1.50838	0.592306	0.0207933	0.629323	0.764634	0.327848
tca-mir-3836c-5-5p	212	16503	1382	2198	2349	813	2880	3512	3684	2296	2043	1529	1331	182	22	34	42	14	45	57	57	39	29	20	21	1	0.920231	0.984914	2.01964	0.992646	1.19638	1.69015	1.31877	1.58059	0.614541	0.390199	0.875615	0.166578
tca-mir-11635-3p	527	16503	1382	2198	2349	813	2880	3512	3684	2296	2043	1529	1331	182	86	112	92	49	126	158	166	106	41	45	48	5	9.27559	6.92078	1.81987	5.16207	4.27234	6.14257	6.53664	4.57431	0.000164819	0.161709	0.784146	0.278549
tca-mir-11636-3p	522	16503	1382	2198	2349	813	2880	3512	3684	2296	2043	1529	1331	182	50	85	85	31	121	140	150	90	76	57	56	9	0.858304	1.69078	1.1028	0.923912	3.54049	3.03954	3.68408	1.90393	1.24515	1.08074	1.93375	1.19395
tca-mir-11636-5p	115	16503	1382	2198	2349	813	2880	3512	3684	2296	2043	1529	1331	182	13	22	22	9	30	38	33	25	15	10	6	1	1.00096	1.54218	1.25964	1.24144	2.15053	2.94391	1.37212	2.12016	0.457797	0.298895	0.0812494	0.440404
tca-mir-3806c-3p	508	16503	1382	2198	2349	813	2880	3512	3684	2296	2043	1529	1331	182	40	67	71	18	123	146	165	106	62	48	38	3	0.205612	0.298991	0.271008	0.0373555	4.44987	4.65789	7.48751	5.29785	0.288396	0.393048	0.185769	0.0885436
tca-mir-11637-5p	2211	16503	1382	2198	2349	813	2880	3512	3684	2296	2043	1529	1331	182	230	338	357	124	494	587	642	401	243	214	179	19	3.87085	2.75307	2.54213	1.28477	10.0133	10.0726	15	9.03123	0.00746061	0.652803	0.339858	0.0662374
tca-mir-11638-3p	96	16503	1382	2198	2349	813	2880	3512	3684	2296	2043	1529	1331	182	11	10	10	4	19	29	33	17	8	8	10	1	0.980475	0.125964	0.0851112	0.288554	0.646942	1.84482	2.63562	0.947984	0.0679514	0.270427	0.824362	0.543639
tca-mir-3836h-3p	231	16503	1382	2198	2349	813	2880	3512	3684	2296	2043	1529	1331	182	50	54	47	26	41	58	63	35	20	24	22	2	10.0166	5.01579	2.39637	4.55144	0.386098	1.17092	1.50838	0.592306	0.0207933	0.629323	0.764634	0.327848
tca-mir-11639-3p	222	16503	1382	2198	2349	813	2880	3512	3684	2296	2043	1529	1331	182	28	32	27	14	47	61	76	41	22	20	17	0	1.95727	0.56114	0.105906	0.871886	1.20534	1.96208	4.80827	1.65148	0.07202	0.306291	0.278553	0.0380381
tca-mir-11617d-1-5p	695	16503	1382	2198	2349	813	2880	3512	3684	2296	2043	1529	1331	182	78	113	106	43	163	204	227	125	81	59	57	4	2.50153	2.00861	0.70037	1.27991	4.79274	6.92198	10.2579	3.0497	0.154933	0.130591	0.385484	0.05252
tca-bantam-3p	329	16503	1382	2198	2349	813	2880	3512	3684	2296	2043	1529	1331	182	42	51	43	21	73	96	114	63	38	33	22	1	2.63536	0.975502	0.156439	1.0423	1.9683	3.59713	7.05197	2.51286	0.193649	0.559882	0.100768	0.0550298
tca-bantam-5p	918	16503	1382	2198	2349	813	2880	3512	3684	2296	2043	1529	1331	182	88	127	132	54	217	257	274	179	115	86	76	8	1.10178	0.52619	0.37125	1.12121	6.40824	6.54364	7.7128	6.23389	0.376953	0.369267	0.426997	0.161814
tca-let-7-3p	1183	16503	1382	2198	2349	813	2880	3512	3684	2296	2043	1529	1331	182	126	186	189	77	270	325	354	213	131	116	101	7	2.72531	2.23419	1.44869	2.31077	6.38929	7.20505	9.96132	4.73937	0.0380768	0.629517	0.606193	0.0204113
tca-let-7-5p	256	16503	1382	2198	2349	813	2880	3512	3684	2296	2043	1529	1331	182	25	40	47	16	67	83	88	55	36	21	21	2	0.753484	0.924245	1.58245	0.88439	3.79804	4.97552	5.50014	3.49412	0.750044	0.169368	0.387156	0.268683
tca-mir-1-3p	637	16503	1382	2198	2349	813	2880	3512	3684	2296	2043	1529	1331	182	90	111	126	53	140	182	194	116	67	49	41	3	6.56262	2.96231	4.44306	4.15482	2.92753	5.43204	6.326	3.08262	0.0359875	0.040906	0.0306139	0.0340217
tca-mir-1-5p	161	16503	1382	2198	2349	813	2880	3512	3684	2296	2043	1529	1331	182	16	26	23	10	28	34	44	19	21	19	12	2	0.718715	0.917293	0.359416	0.766512	0.339414	0.323829	1.26407	0.129875	0.463842	0.965614	0.267335	0.581378
tca-mir-10-3p	1183	16503	1382	2198	2349	813	2880	3512	3684	2296	2043	1529	1331	182	111	192	208	64	271	318	341	221	141	118	98	9	1.04868	2.91295	3.43626	0.717646	6.55625	6.09419	7.61909	6.05476	0.172576	0.752537	0.441662	0.0714097
tca-mir-10-5p	275	16503	1382	2198	2349	813	2880	3512	3684	2296	2043	1529	1331	182	24	44	45	14	71	81	91	57	33	22	27	1	0.439501	1.08553	0.869544	0.420186	3.77524	3.30263	4.88646	3.17364	0.274809	0.137694	0.923341	0.0916127
tca-mir-100-3p	387	16503	1382	2198	2349	813	2880	3512	3684	2296	2043	1529	1331	182	26	51	65	18	98	115	130	84	44	40	33	2	0.0629222	0.304884	1.18625	0.267595	4.50749	4.5161	7.00411	5.044	0.156103	0.692928	0.487506	0.0949572
tca-mir-100-5p	75	16503	1382	2198	2349	813	2880	3512	3684	2296	2043	1529	1331	182	8	13	10	3	18	22	23	15	6	7	8	1	0.759621	0.926801	0.294692	0.293503	1.26534	1.44122	1.46956	1.2927	0.07769	0.405499	0.827998	0.697922
tca-mir-1000-3p	227	16503	1382	2198	2349	813	2880	3512	3684	2296	2043	1529	1331	182	17	35	27	11	57	68	73	46	28	19	10	2	0.199756	0.823029	0.0859315	0.353402	2.88816	3.12283	3.66318	2.51995	0.339131	0.202235	0.00926685	0.33851
tca-mir-1000-5p	1649	16503	1382	2198	2349	813	2880	3512	3684	2296	2043	1529	1331	182	157	264	249	100	369	444	473	284	208	174	158	21	1.4411	3.40089	0.865469	1.91765	7.55247	8.44835	10.1107	4.54873	0.440178	1.56109	2.06652	0.69481
tca-mir-11-3p	1653	16503	1382	2198	2349	813	2880	3512	3684	2296	2043	1529	1331	182	275	383	395	172	322	399	431	255	180	129	133	8	15	15	15	15	1.9697	2.85054	4.19657	1.53616	0.0120222	0.00687931	0.310842	0.00185569
tca-mir-11-5p	203	16503	1382	2198	2349	813	2880	3512	3684	2296	2043	1529	1331	182	16	25	26	8	56	72	69	49	20	17	13	3	0.269993	0.209926	0.167969	0.171122	3.96603	6.01217	4.33888	4.52977	0.0758398	0.212048	0.115181	0.729293
tca-mir-1175-3p	424	16503	1382	2198	2349	813	2880	3512	3684	2296	2043	1529	1331	182	41	68	78	24	85	109	123	66	50	40	34	4	0.841593	1.36124	2.18079	0.693348	1.15562	1.93932	3.33702	0.844021	0.214265	0.387111	0.329194	0.298211
tca-mir-1175-5p	231	16503	1382	2198	2349	813	2880	3512	3684	2296	2043	1529	1331	182	27	36	30	12	59	65	65	40	21	16	17	0	1.51837	0.877065	0.175433	0.454508	3.15689	2.29165	1.82208	1.23556	0.0326558	0.0600576	0.224485	0.0342286
tca-mir-12-3p	120	16503	1382	2198	2349	813	2880	3512	3684	2296	2043	1529	1331	182	9	12	12	6	35	45	39	30	14	6	10	0	0.256175	0.0833291	0.051355	0.421328	3.30484	4.83664	2.4441	3.42548	0.2793	0.028679	0.426213	0.132533
tca-mir-12-5p	525	16503	1382	2198	2349	813	2880	3512	3684	2296	2043	1529	1331	182	58	82	86	37	126	157	158	100	55	51	41	3	1.91048	1.27777	1.15723	1.93875	4.35164	6.03549	4.9832	3.4389	0.0450748	0.487736	0.262628	0.0783197
tca-mir-124-3p	495	16503	1382	2198	2349	813	2880	3512	3684	2296	2043	1529	1331	182	61	85	87	38	92	135	131	78	58	55	40	4	3.05402	2.26713	1.82857	2.57814	0.639489	3.27311	1.92911	0.985172	0.190661	1.17005	0.344085	0.193257
tca-mir-124-5p	329	16503	1382	2198	2349	813	2880	3512	3684	2296	2043	1529	1331	182	31	62	59	19	79	83	87	57	35	32	26	1	0.676398	2.7666	1.61252	0.709342	3.04025	1.45239	1.49549	1.48806	0.0912173	0.466799	0.308202	0.0550298
tca-mir-125-3p	307	16503	1382	2198	2349	813	2880	3512	3684	2296	2043	1529	1331	182	30	43	47	19	50	70	78	40	34	25	32	1	0.798077	0.490488	0.582343	0.906439	0.170582	0.635172	1.06805	0.195651	0.139261	0.145814	1.25851	0.0677388
tca-mir-125-5p	138	16503	1382	2198	2349	813	2880	3512	3684	2296	2043	1529	1331	182	14	23	22	13	46	48	49	38	13	15	14	0	0.746047	0.992715	0.624023	2.08827	5.7482	4.09476	3.86989	5.11475	0.0846127	0.683018	0.837309	0.10517
tca-mir-133-3p	256	16503	1382	2198	2349	813	2880	3512	3684	2296	2043	1529	1331	182	31	38	45	18	63	80	74	51	30	21	21	0	1.83704	0.688293	1.26409	1.30436	2.86516	4.19543	2.27657	2.54118	0.235488	0.169368	0.387156	0.0255801
tca-mir-133-5p	176	16503	1382	2198	2349	813	2880	3512	3684	2296	2043	1529	1331	182	15	24	25	9	38	47	46	31	20	16	18	3	0.393941	0.401275	0.345537	0.434329	1.19935	1.46654	1.01565	1.18029	0.217197	0.331654	0.928703	0.884896
tca-mir-137-3p	1130	16503	1382	2198	2349	813	2880	3512	3684	2296	2043	1529	1331	182	137	194	198	82	239	280	301	187	149	110	100	14	5.52533	4.25533	3.22343	3.82029	3.41017	2.82397	3.7641	2.38796	0.735955	0.575066	0.838907	0.576766
tca-mir-137-5p	272	16503	1382	2198	2349	813	2880	3512	3684	2296	2043	1529	1331	182	22	35	38	11	67	79	77	53	34	18	24	1	0.29022	0.264645	0.294998	0.158777	3.00601	3.04268	2.09343	2.39728	0.366215	0.0334245	0.559546	0.0942439
tca-mir-13a-3p	1653	16503	1382	2198	2349	813	2880	3512	3684	2296	2043	1529	1331	182	275	383	395	172	322	399	431	255	180	129	133	8	15	15	15	15	1.9697	2.85054	4.19657	1.53616	0.0120222	0.00687931	0.310842	0.00185569
tca-mir-13a-5p	380	16503	1382	2198	2349	813	2880	3512	3684	2296	2043	1529	1331	182	47	60	59	27	93	109	118	77	41	45	42	3	2.56862	1.16684	0.679878	1.65257	3.74026	3.65111	4.58257	3.65611	0.0928004	1.43912	1.82479	0.217043
tca-mir-13b-3p	1653	16503	1382	2198	2349	813	2880	3512	3684	2296	2043	1529	1331	182	275	383	395	172	322	399	431	255	180	129	133	8	15	15	15	15	1.9697	2.85054	4.19657	1.53616	0.0120222	0.00687931	0.310842	0.00185569
tca-mir-13b-5p	541	16503	1382	2198	2349	813	2880	3512	3684	2296	2043	1529	1331	182	66	92	93	41	113	138	149	80	55	43	43	0	3.12068	2.27342	1.66671	2.61512	1.81064	2.14725	2.80044	0.599009	0.0273722	0.0751316	0.300935	0.000974793
tca-mir-14-3p	707	16503	1382	2198	2349	813	2880	3512	3684	2296	2043	1529	1331	182	87	135	136	55	175	211	231	147	68	60	55	3	3.99475	5.37836	4.13303	3.51721	6.66225	7.75854	10.4428	6.93092	0.00494393	0.128737	0.237899	0.0197333
tca-mir-14-5p	72	16503	1382	2198	2349	813	2880	3512	3684	2296	2043	1529	1331	182	4	8	11	3	22	27	25	18	10	5	4	1	0.135963	0.198259	0.489002	0.321785	2.70559	3.30364	2.27155	2.4314	0.561338	0.175759	0.15511	0.724738
tca-mir-184-3p	186	16503	1382	2198	2349	813	2880	3512	3684	2296	2043	1529	1331	182	19	24	28	13	40	60	57	32	27	19	8	2	0.828735	0.289684	0.485032	1.11927	1.20603	3.78581	2.50797	1.08476	0.801368	0.561348	0.0138095	0.471945
tca-mir-184-5p	343	16503	1382	2198	2349	813	2880	3512	3684	2296	2043	1529	1331	182	24	46	53	15	94	114	120	79	38	30	33	6	0.0995889	0.356016	0.638322	0.203812	5.88347	7.11972	7.64254	5.82377	0.13047	0.23209	0.911198	1.06559
tca-mir-190-3p	129	16503	1382	2198	2349	813	2880	3512	3684	2296	2043	1529	1331	182	13	23	23	9	31	35	39	24	13	13	9	1	0.718459	1.26107	1.0013	0.981941	1.66725	1.35364	1.86264	1.28645	0.130695	0.512399	0.222396	0.379529
tca-mir-190-5p	664	16503	1382	2198	2349	813	2880	3512	3684	2296	2043	1529	1331	182	70	118	115	39	186	205	223	147	62	55	53	5	1.71928	3.4356	2.00098	0.961985	11.6953	8.87578	11.3953	8.79076	0.00318208	0.100711	0.304875	0.127486
tca-mir-193-3p	200	16503	1382	2198	2349	813	2880	3512	3684	2296	2043	1529	1331	182	20	35	31	11	48	60	66	41	22	17	17	0	0.778211	1.44809	0.578919	0.549039	2.15476	2.87158	3.75588	2.42807	0.167561	0.230822	0.457495	0.0493288
tca-mir-210-3p	458	16503	1382	2198	2349	813	2880	3512	3684	2296	2043	1529	1331	182	52	84	84	29	95	116	125	81	54	46	36	3	2.00093	3.0792	2.25692	1.16251	1.55392	1.82071	2.32375	2.0475	0.208855	0.603079	0.282933	0.126346
tca-mir-210-5p	178	16503	1382	2198	2349	813	2880	3512	3684	2296	2043	1529	1331	182	14	28	20	7	40	50	56	33	24	17	10	3	0.276308	0.840521	0.0693906	0.183728	1.47162	1.9231	2.76265	1.48842	0.552879	0.415291	0.0660491	0.872129
tca-mir-219-3p	141	16503	1382	2198	2349	813	2880	3512	3684	2296	2043	1529	1331	182	6	17	19	6	39	49	51	36	19	11	10	1	0.0193265	0.211501	0.264668	0.262464	3.06366	4.14858	4.23073	4.12141	0.534773	0.177629	0.228395	0.33518
tca-mir-219-5p	567	16503	1382	2198	2349	813	2880	3512	3684	2296	2043	1529	1331	182	58	94	94	40	136	169	180	108	61	52	55	7	1.32051	2.00139	1.31861	2.0432	4.61952	6.33145	7.28404	3.65099	0.0598213	0.305875	1.18275	0.539095
tca-mir-252a-3p	227	16503	1382	2198	2349	813	2880	3512	3684	2296	2043	1529	1331	182	17	35	27	11	57	68	73	46	28	19	10	2	0.199756	0.823029	0.0859315	0.353402	2.88816	3.12283	3.66318	2.51995	0.339131	0.202235	0.00926685	0.33851
tca-mir-252a-5p	1218	16503	1382	2198	2349	813	2880	3512	3684	2296	2043	1529	1331	182	158	228	235	98	262	328	356	213	142	92	99	7	8.23128	7.85651	6.75392	6.36325	4.18284	6.34857	8.67844	3.93987	0.112537	0.00720091	0.356625	0.0163016
tca-mir-252b-3p	105	16503	1382	2198	2349	813	2880	3512	3684	2296	2043	1529	1331	182	7	13	11	3	28	31	35	22	7	11	9	1	0.179373	0.266169	0.0795764	0.115524	2.2029	1.769	2.48214	1.77658	0.0191595	0.576403	0.468992	0.49131
tca-mir-252b-5p	1035	16503	1382	2198	2349	813	2880	3512	3684	2296	2043	1529	1331	182	138	189	192	79	238	294	312	191	115	72	81	5	8.00131	5.84972	4.52727	4.43232	5.96194	8.06709	9.21457	4.97229	0.0496493	0.00162302	0.231567	0.0110408
tca-mir-263a-3p	169	16503	1382	2198	2349	813	2880	3512	3684	2296	2043	1529	1331	182	12	21	24	8	42	55	51	32	21	14	14	3	0.176153	0.236161	0.346184	0.342821	2.25932	3.65724	2.1821	1.58309	0.361695	0.215606	0.410679	0.93136
tca-mir-263a-5p	479	16503	1382	2198	2349	813	2880	3512	3684	2296	2043	1529	1331	182	43	82	73	23	114	156	180	102	50	30	25	3	0.552307	2.17797	0.623862	0.304383	3.8569	8.68965	14.2303	5.53714	0.0486041	0.00450022	0.00415866	0.108922
tca-mir-263b-3p	458	16503	1382	2198	2349	813	2880	3512	3684	2296	2043	1529	1331	182	34	66	65	22	107	128	134	89	47	38	31	3	0.130163	0.658499	0.32131	0.307138	3.3518	3.60994	3.73971	3.43982	0.0411755	0.133233	0.0821862	0.126346
tca-mir-263b-5p	760	16503	1382	2198	2349	813	2880	3512	3684	2296	2043	1529	1331	182	82	130	121	47	173	217	245	136	88	73	62	6	2.14378	3.01599	1.09726	1.33807	4.26943	6.30704	10.3719	3.16161	0.134889	0.466694	0.368405	0.131582
tca-mir-275-3p	291	16503	1382	2198	2349	813	2880	3512	3684	2296	2043	1529	1331	182	35	42	47	25	70	81	86	54	44	38	24	5	1.9321	0.595853	0.818669	2.59775	2.80774	2.52308	2.82597	1.98636	1.17269	1.91589	0.397174	0.985114
tca-mir-275-5p	579	16503	1382	2198	2349	813	2880	3512	3684	2296	2043	1529	1331	182	51	92	106	41	124	150	167	96	71	61	53	9	0.498718	1.52341	2.6303	2.10255	2.27588	2.54274	4.10441	1.55643	0.298329	0.896712	0.836717	0.96673
tca-mir-276-3p	332	16503	1382	2198	2349	813	2880	3512	3684	2296	2043	1529	1331	182	45	49	57	24	83	114	117	69	25	32	27	7	3.31592	0.714499	1.26036	1.62926	3.74955	8.00153	7.67758	3.69711	0.00120654	0.44205	0.3656	1.50654
tca-mir-276-5p	87	16503	1382	2198	2349	813	2880	3512	3684	2296	2043	1529	1331	182	12	10	11	6	11	18	18	9	12	10	11	1	1.54349	0.206648	0.226401	0.863923	0.0692864	0.308467	0.232744	0.104028	0.557647	0.745009	1.3357	0.603462
tca-mir-2765-3p	130	16503	1382	2198	2349	813	2880	3512	3684	2296	2043	1529	1331	182	17	22	21	10	25	35	37	20	13	15	13	1	1.63025	1.03218	0.655121	1.25075	0.597814	1.30889	1.40368	0.579312	0.124691	0.831892	0.786236	0.37558
tca-mir-2765-5p	388	16503	1382	2198	2349	813	2880	3512	3684	2296	2043	1529	1331	182	45	66	60	25	89	111	120	76	33	34	32	4	1.98446	1.83383	0.663361	1.15788	2.66852	3.65392	4.55759	3.15895	0.00400823	0.227046	0.397157	0.370172
tca-mir-277-3p	1082	16503	1382	2198	2349	813	2880	3512	3684	2296	2043	1529	1331	182	140	177	187	80	191	259	286	147	111	92	84	6	7.28282	2.8907	2.79344	4.00901	0.387877	1.88192	3.37425	0.218072	0.00632979	0.0976726	0.207284	0.0184772
tca-mir-2788-3p	223	16503	1382	2198	2349	813	2880	3512	3684	2296	2043	1529	1331	182	21	29	31	7	57	60	69	42	17	23	16	1	0.619163	0.295469	0.292761	0.0634369	3.08759	1.74833	2.98783	1.81107	0.00656513	0.603769	0.199069	0.149949
tca-mir-2788-5p	228	16503	1382	2198	2349	813	2880	3512	3684	2296	2043	1529	1331	182	29	32	31	15	58	63	67	51	21	23	19	2	2.04875	0.480463	0.248982	1.0066	3.07154	2.05795	2.31208	3.7525	0.0375126	0.544948	0.419083	0.335811
tca-mir-2796-3p	158	16503	1382	2198	2349	813	2880	3512	3684	2296	2043	1529	1331	182	18	31	33	12	42	44	51	33	12	15	21	0	1.15777	2.02124	2.08996	1.31356	2.84883	1.71549	2.86043	2.24067	0.0164091	0.40583	2.08426	0.0819404
tca-mir-2796-5p	211	16503	1382	2198	2349	813	2880	3512	3684	2296	2043	1529	1331	182	25	28	26	14	61	66	68	57	23	21	15	1	1.5223	0.339031	0.122333	1.00549	4.91316	3.6312	3.50243	6.82116	0.153038	0.506134	0.194466	0.168182
tca-mir-279a-3p	547	16503	1382	2198	2349	813	2880	3512	3684	2296	2043	1529	1331	182	121	149	135	77	106	115	143	81	67	58	41	5	15	15	10.8154	15	0.982573	0.271947	1.85808	0.608346	0.296528	0.914898	0.183379	0.24933
tca-mir-279a-5p	194	16503	1382	2198	2349	813	2880	3512	3684	2296	2043	1529	1331	182	16	21	23	12	58	64	67	48	17	19	16	1	0.337661	0.0856966	0.0965776	0.790955	5.21025	4.30528	4.48835	4.76005	0.032355	0.46651	0.401009	0.198106
tca-mir-279b-3p	547	16503	1382	2198	2349	813	2880	3512	3684	2296	2043	1529	1331	182	121	149	135	77	106	115	143	81	67	58	41	5	15	15	10.8154	15	0.982573	0.271947	1.85808	0.608346	0.296528	0.914898	0.183379	0.24933
tca-mir-279b-5p	158	16503	1382	2198	2349	813	2880	3512	3684	2296	2043	1529	1331	182	17	23	22	9	38	43	52	32	15	16	12	0	0.951231	0.560036	0.311318	0.597896	1.88031	1.52806	3.11745	1.99353	0.0768306	0.530807	0.290511	0.0819404
tca-mir-279c-3p	547	16503	1382	2198	2349	813	2880	3512	3684	2296	2043	1529	1331	182	121	149	135	77	106	115	143	81	67	58	41	5	15	15	10.8154	15	0.982573	0.271947	1.85808	0.608346	0.296528	0.914898	0.183379	0.24933
tca-mir-279c-5p	198	16503	1382	2198	2349	813	2880	3512	3684	2296	2043	1529	1331	182	12	25	22	6	52	60	70	41	17	22	19	2	0.0678653	0.249444	0.0557004	0.0646654	3.18319	2.99033	5.04018	2.51102	0.0263593	0.816063	0.75625	0.427783
tca-mir-279d-3p	547	16503	1382	2198	2349	813	2880	3512	3684	2296	2043	1529	1331	182	121	149	135	77	106	115	143	81	67	58	41	5	15	15	10.8154	15	0.982573	0.271947	1.85808	0.608346	0.296528	0.914898	0.183379	0.24933
tca-mir-279d-5p	217	16503	1382	2198	2349	813	2880	3512	3684	2296	2043	1529	1331	182	16	22	20	9	41	56	59	34	15	26	20	3	0.187375	0.0437089	0.00749084	0.199883	0.596547	1.34732	1.4302	0.708767	0.00266846	1.15355	0.654951	0.660995
tca-mir-279e-3p	547	16503	1382	2198	2349	813	2880	3512	3684	2296	2043	1529	1331	182	121	149	135	77	106	115	143	81	67	58	41	5	15	15	10.8154	15	0.982573	0.271947	1.85808	0.608346	0.296528	0.914898	0.183379	0.24933
tca-mir-279e-5p	217	16503	1382	2198	2349	813	2880	3512	3684	2296	2043	1529	1331	182	17	31	31	12	62	69	78	49	18	26	20	2	0.257382	0.530674	0.353146	0.563215	4.80041	3.9974	5.82458	3.74628	0.0160076	1.15355	0.654951	0.366803
tca-mir-281-3p	503	16503	1382	2198	2349	813	2880	3512	3684	2296	2043	1529	1331	182	47	85	99	32	117	144	154	95	57	49	47	6	0.72523	2.08361	3.58068	1.23947	3.51152	4.51247	5.33052	3.17884	0.130185	0.495099	0.900618	0.495065
tca-mir-281-5p	248	16503	1382	2198	2349	813	2880	3512	3684	2296	2043	1529	1331	182	39	38	43	18	46	58	61	39	35	29	25	4	4.36269	0.819186	1.15713	1.41986	0.538585	0.733607	0.763573	0.752379	0.757816	1.1035	0.994726	0.854451
tca-mir-282-3p	162	16503	1382	2198	2349	813	2880	3512	3684	2296	2043	1529	1331	182	15	20	23	5	51	56	61	45	21	13	8	1	0.550363	0.230294	0.346879	0.0887112	5.41206	4.52582	5.51977	5.97624	0.449923	0.188406	0.0392785	0.271146
tca-mir-282-5p	136	16503	1382	2198	2349	813	2880	3512	3684	2296	2043	1529	1331	182	23	26	22	11	34	37	40	29	12	13	7	1	3.43475	1.68256	0.66577	1.44036	2.02078	1.40896	1.68775	2.19918	0.0584518	0.419515	0.0622016	0.352879
tca-mir-283-3p	794	16503	1382	2198	2349	813	2880	3512	3684	2296	2043	1529	1331	182	83	132	135	50	172	226	231	144	91	79	60	7	1.8293	2.57566	1.96385	1.50302	3.12057	6.42461	5.68344	3.56681	0.112485	0.645615	0.169414	0.184839
tca-mir-283-5p	1401	16503	1382	2198	2349	813	2880	3512	3684	2296	2043	1529	1331	182	199	283	290	127	285	345	367	223	137	121	108	8	14.0913	13.6324	11.7045	11.5158	2.82389	3.13869	3.82068	1.94025	0.000381305	0.104062	0.171241	0.0105967
tca-mir-29-3p	312	16503	1382	2198	2349	813	2880	3512	3684	2296	2043	1529	1331	182	37	45	49	20	60	76	81	47	37	30	28	2	1.90538	0.602194	0.697189	1.03684	0.743997	1.09232	1.26879	0.608594	0.244609	0.434158	0.62462	0.172512
tca-mir-29-5p	793	16503	1382	2198	2349	813	2880	3512	3684	2296	2043	1529	1331	182	64	119	122	35	172	207	220	143	107	78	55	8	0.226997	1.15321	0.801454	0.142244	3.14702	3.42529	3.98982	3.43515	0.81994	0.583482	0.0594873	0.289557
tca-mir-2944a-3p	1653	16503	1382	2198	2349	813	2880	3512	3684	2296	2043	1529	1331	182	275	383	395	172	322	399	431	255	180	129	133	8	15	15	15	15	1.9697	2.85054	4.19657	1.53616	0.0120222	0.00687931	0.310842	0.00185569
tca-mir-2944a-5p	332	16503	1382	2198	2349	813	2880	3512	3684	2296	2043	1529	1331	182	45	49	57	24	83	114	117	69	25	32	27	7	3.31592	0.714499	1.26036	1.62926	3.74955	8.00153	7.67758	3.69711	0.00120654	0.44205	0.3656	1.50654
tca-mir-2944b-3p	1653	16503	1382	2198	2349	813	2880	3512	3684	2296	2043	1529	1331	182	275	383	395	172	322	399	431	255	180	129	133	8	15	15	15	15	1.9697	2.85054	4.19657	1.53616	0.0120222	0.00687931	0.310842	0.00185569
tca-mir-2944b-5p	504	16503	1382	2198	2349	813	2880	3512	3684	2296	2043	1529	1331	182	51	80	80	28	107	139	146	83	53	58	38	8	1.16965	1.3979	0.88923	0.66206	1.94825	3.57329	3.78141	1.37086	0.0502417	1.44438	0.199146	0.974047
tca-mir-2944c-3p	1653	16503	1382	2198	2349	813	2880	3512	3684	2296	2043	1529	1331	182	275	383	395	172	322	399	431	255	180	129	133	8	15	15	15	15	1.9697	2.85054	4.19657	1.53616	0.0120222	0.00687931	0.310842	0.00185569
tca-mir-2944c-5p	504	16503	1382	2198	2349	813	2880	3512	3684	2296	2043	1529	1331	182	51	80	80	28	107	139	146	83	53	58	38	8	1.16965	1.3979	0.88923	0.66206	1.94825	3.57329	3.78141	1.37086	0.0502417	1.44438	0.199146	0.974047
tca-mir-2a-3p	1653	16503	1382	2198	2349	813	2880	3512	3684	2296	2043	1529	1331	182	275	383	395	172	322	399	431	255	180	129	133	8	15	15	15	15	1.9697	2.85054	4.19657	1.53616	0.0120222	0.00687931	0.310842	0.00185569
tca-mir-2a-5p	187	16503	1382	2198	2349	813	2880	3512	3684	2296	2043	1529	1331	182	20	23	23	11	42	53	54	33	22	18	19	2	0.988625	0.214361	0.131046	0.672966	1.50716	2.07498	1.85378	1.22434	0.262047	0.430285	0.9256	0.468079
tca-mir-2b-3p	1653	16503	1382	2198	2349	813	2880	3512	3684	2296	2043	1529	1331	182	275	383	395	172	322	399	431	255	180	129	133	8	15	15	15	15	1.9697	2.85054	4.19657	1.53616	0.0120222	0.00687931	0.310842	0.00185569
tca-mir-2b-5p	270	16503	1382	2198	2349	813	2880	3512	3684	2296	2043	1529	1331	182	20	38	38	10	59	71	80	52	36	26	25	4	0.173023	0.498552	0.312401	0.106735	1.59893	1.70877	2.71866	2.26091	0.555556	0.435017	0.703332	0.748092
tca-mir-2c-3p	427	16503	1382	2198	2349	813	2880	3512	3684	2296	2043	1529	1331	182	56	70	76	27	86	115	114	67	37	38	30	1	3.53406	1.56579	1.80404	1.12024	1.20151	2.69739	1.87948	0.897317	0.0038324	0.249595	0.120805	0.0216251
tca-mir-2c-5p	1048	16503	1382	2198	2349	813	2880	3512	3684	2296	2043	1529	1331	182	125	178	190	78	217	277	286	180	126	98	83	8	4.75619	3.70907	3.90607	4.01947	2.66883	4.7783	4.39753	3.04306	0.207955	0.362894	0.265898	0.0840538
tca-mir-3049-3p	146	16503	1382	2198	2349	813	2880	3512	3684	2296	2043	1529	1331	182	12	26	19	7	37	40	44	34	17	14	9	0	0.34576	1.33051	0.214749	0.365782	2.23184	1.51393	1.9776	3.13013	0.263291	0.423991	0.125327	0.0951015
tca-mir-3049-5p	158	16503	1382	2198	2349	813	2880	3512	3684	2296	2043	1529	1331	182	15	20	22	8	40	43	51	34	22	13	10	1	0.60362	0.267806	0.311318	0.424463	2.33842	1.52806	2.86043	2.50259	0.632326	0.214486	0.132349	0.282193
tca-mir-305-3p	209	16503	1382	2198	2349	813	2880	3512	3684	2296	2043	1529	1331	182	22	29	24	10	52	56	70	38	27	25	16	5	0.968996	0.445429	0.0691067	0.341918	2.61558	1.64393	4.15582	1.48603	0.447316	1.12729	0.282016	1.54479
tca-mir-305-5p	1214	16503	1382	2198	2349	813	2880	3512	3684	2296	2043	1529	1331	182	147	202	214	81	259	319	366	208	135	127	105	9	5.85395	3.60802	3.58126	2.68556	3.89478	5.17641	10.7446	3.35791	0.0404704	1.20036	0.695015	0.0607878
tca-mir-307-3p	666	16503	1382	2198	2349	813	2880	3512	3684	2296	2043	1529	1331	182	89	130	123	57	128	176	182	97	69	63	59	7	5.45606	5.71701	3.08136	4.75852	0.993527	3.28838	3.08236	0.542098	0.0256879	0.401101	0.701731	0.343114
tca-mir-307-5p	302	16503	1382	2198	2349	813	2880	3512	3684	2296	2043	1529	1331	182	30	35	41	18	61	75	78	49	34	34	26	4	0.859582	0.103347	0.228769	0.783857	1.04085	1.23981	1.20085	0.973267	0.161806	1.00674	0.500678	0.617728
tca-mir-308-3p	1653	16503	1382	2198	2349	813	2880	3512	3684	2296	2043	1529	1331	182	275	383	395	172	322	399	431	255	180	129	133	8	15	15	15	15	1.9697	2.85054	4.19657	1.53616	0.0120222	0.00687931	0.310842	0.00185569
tca-mir-308-5p	173	16503	1382	2198	2349	813	2880	3512	3684	2296	2043	1529	1331	182	13	24	26	6	47	55	57	40	23	20	15	2	0.226472	0.44076	0.477405	0.122417	3.31182	3.36722	3.34619	3.44992	0.513234	0.91616	0.493659	0.525609
tca-mir-309a-3p	231	16503	1382	2198	2349	813	2880	3512	3684	2296	2043	1529	1331	182	50	54	47	26	41	58	63	35	20	24	22	2	10.0166	5.01579	2.39637	4.55144	0.386098	1.17092	1.50838	0.592306	0.0207933	0.629323	0.764634	0.327848
tca-mir-309a-5p	485	16503	1382	2198	2349	813	2880	3512	3684	2296	2043	1529	1331	182	32	62	60	14	107	136	142	89	68	52	32	4	0.0386756	0.217269	0.0600706	0.00756531	2.4634	3.85608	3.93066	2.63793	0.923014	0.935225	0.0604338	0.205582
tca-mir-309b-3p	231	16503	1382	2198	2349	813	2880	3512	3684	2296	2043	1529	1331	182	50	54	47	26	41	58	63	35	20	24	22	2	10.0166	5.01579	2.39637	4.55144	0.386098	1.17092	1.50838	0.592306	0.0207933	0.629323	0.764634	0.327848
tca-mir-309b-5p	431	16503	1382	2198	2349	813	2880	3512	3684	2296	2043	1529	1331	182	57	84	73	41	95	116	118	78	42	28	39	0	3.67803	3.96336	1.32451	4.70219	2.25729	2.70355	2.2802	2.247	0.0224823	0.0101548	0.708021	0.00343612
tca-mir-31-5p	305	16503	1382	2198	2349	813	2880	3512	3684	2296	2043	1529	1331	182	31	46	47	20	69	78	91	54	37	29	27	3	0.961752	0.799814	0.608632	1.11437	2.09464	1.53018	3.08767	1.6056	0.292806	0.405779	0.579705	0.36167
tca-mir-315-3p	439	16503	1382	2198	2349	813	2880	3512	3684	2296	2043	1529	1331	182	29	49	58	17	106	125	134	80	57	34	37	4	0.0454881	0.0451533	0.151373	0.0857325	3.899	3.91442	4.67654	2.36558	0.49929	0.0711005	0.459056	0.272348
tca-mir-315-5p	1419	16503	1382	2198	2349	813	2880	3512	3684	2296	2043	1529	1331	182	132	233	214	76	337	389	394	259	167	137	99	12	1.06162	3.70853	0.796483	0.704571	9.93183	8.41966	6.69321	6.13185	0.123226	0.553769	0.0276437	0.0991508
tca-mir-316-3p	209	16503	1382	2198	2349	813	2880	3512	3684	2296	2043	1529	1331	182	11	18	17	5	58	60	72	51	14	28	18	2	0.026439	0.010194	0.00211684	0.0229095	4.15391	2.3814	4.71006	4.81447	0.00226086	1.74243	0.485691	0.391251
tca-mir-316-5p	770	16503	1382	2198	2349	813	2880	3512	3684	2296	2043	1529	1331	182	67	118	114	41	196	228	247	162	96	76	59	2	0.47025	1.36009	0.523642	0.574029	8.37928	8.00188	10.2107	7.9305	0.354012	0.597225	0.199195	0.00349347
tca-mir-317-3p	602	16503	1382	2198	2349	813	2880	3512	3684	2296	2043	1529	1331	182	70	101	104	48	133	167	193	104	55	60	34	1	2.69994	2.24913	1.84393	3.41036	2.90834	4.28037	8.11831	2.11841	0.00287616	0.608658	0.00568815	0.00386746
tca-mir-317-5p	91	16503	1382	2198	2349	813	2880	3512	3684	2296	2043	1529	1331	182	10	12	15	8	22	27	36	17	9	8	4	0	0.859233	0.357944	0.662966	1.45524	1.42189	1.66641	4.19241	1.12241	0.15256	0.327532	0.0618211	0.196214
tca-mir-33-3p	276	16503	1382	2198	2349	813	2880	3512	3684	2296	2043	1529	1331	182	22	41	43	13	62	73	79	46	23	28	24	2	0.266112	0.705958	0.639846	0.305901	1.89081	1.79528	2.25912	1.09504	0.00901454	0.577965	0.521588	0.229321
tca-mir-33-5p	614	16503	1382	2198	2349	813	2880	3512	3684	2296	2043	1529	1331	182	47	77	81	27	165	187	197	130	81	59	55	5	0.14551	0.158552	0.122618	0.159638	8.96088	7.67091	8.29999	6.67721	0.612446	0.456223	0.739529	0.170666
tca-mir-34-3p	200	16503	1382	2198	2349	813	2880	3512	3684	2296	2043	1529	1331	182	12	26	26	4	51	62	61	42	23	15	16	1	0.06325	0.299753	0.188324	0.0125683	2.82785	3.34814	2.57347	2.67288	0.223603	0.115234	0.349206	0.186947
tca-mir-34-5p	411	16503	1382	2198	2349	813	2880	3512	3684	2296	2043	1529	1331	182	31	51	47	13	111	140	154	96	52	44	30	2	0.158305	0.168574	0.0244992	0.0236961	6.42845	9.33761	12.181	7.18593	0.401839	0.869189	0.167691	0.0782585
tca-mir-3477-3p	264	16503	1382	2198	2349	813	2880	3512	3684	2296	2043	1529	1331	182	32	55	48	18	54	63	76	43	31	26	18	1	1.87767	3.623	1.53241	1.19708	1.06415	0.872161	2.2689	0.943037	0.236929	0.490753	0.135758	0.10164
tca-mir-3477-5p	583	16503	1382	2198	2349	813	2880	3512	3684	2296	2043	1529	1331	182	67	101	118	46	120	149	151	91	56	53	38	4	2.49238	2.67977	4.66886	3.20378	1.69488	2.29564	1.78379	0.982493	0.00869358	0.281876	0.0412946	0.110764
tca-mir-375-3p	663	16503	1382	2198	2349	813	2880	3512	3684	2296	2043	1529	1331	182	58	91	101	32	170	202	214	140	84	61	46	0	0.482074	0.455394	0.681891	0.299563	7.60236	8.23827	9.20248	7.05583	0.419718	0.310525	0.0730296	0.000239122
tca-mir-375-5p	235	16503	1382	2198	2349	813	2880	3512	3684	2296	2043	1529	1331	182	32	33	40	19	59	68	71	46	22	25	22	1	2.64054	0.483545	1.02308	1.90545	2.95834	2.68774	2.74132	2.22201	0.0413257	0.70638	0.713471	0.133763
tca-mir-3791-3p	97	16503	1382	2198	2349	813	2880	3512	3684	2296	2043	1529	1331	182	8	17	15	6	28	33	34	26	5	13	6	0	0.371291	1.05103	0.520281	0.696127	2.75268	2.91813	2.85621	3.61782	0.00646218	1.20083	0.17066	0.180448
tca-mir-3791-5p	284	16503	1382	2198	2349	813	2880	3512	3684	2296	2043	1529	1331	182	19	39	45	14	59	74	75	48	36	29	21	5	0.0852576	0.423885	0.719251	0.368054	1.21414	1.66137	1.36597	1.2002	0.402641	0.60146	0.21406	1.02278
tca-mir-3803-3p	337	16503	1382	2198	2349	813	2880	3512	3684	2296	2043	1529	1331	182	33	46	50	20	82	97	91	65	32	36	41	5	0.831392	0.408937	0.469199	0.795485	3.31283	3.39648	1.76158	2.64664	0.0259194	0.801229	2.5024	0.771291
tca-mir-3804a-5p	397	16503	1382	2198	2349	813	2880	3512	3684	2296	2043	1529	1331	182	38	80	65	20	94	112	131	75	51	43	29	5	0.777307	4.3236	1.01184	0.397817	3.24327	3.42465	6.55196	2.67716	0.45297	0.917135	0.171508	0.561427
tca-mir-3804b-3p	339	16503	1382	2198	2349	813	2880	3512	3684	2296	2043	1529	1331	182	34	58	71	22	69	91	92	56	34	34	21	3	0.939553	1.74357	3.58371	1.12206	1.157	2.24827	1.83101	1.14272	0.0478843	0.56255	0.0540467	0.287102
tca-mir-3804b-5p	205	16503	1382	2198	2349	813	2880	3512	3684	2296	2043	1529	1331	182	20	28	28	10	48	61	72	40	27	18	10	1	0.707851	0.405191	0.263477	0.366852	1.94736	2.80945	5.0411	2.01019	0.497607	0.271751	0.0234378	0.178157
tca-mir-3805a-3p	506	16503	1382	2198	2349	813	2880	3512	3684	2296	2043	1529	1331	182	45	81	79	29	136	164	176	109	51	54	32	5	0.523303	1.48313	0.778202	0.771828	7.53692	8.91721	10.542	6.11163	0.0270591	0.924201	0.0365344	0.312598
tca-mir-3805a-5p	146	16503	1382	2198	2349	813	2880	3512	3684	2296	2043	1529	1331	182	22	22	22	11	31	40	39	24	11	14	14	0	2.62964	0.650763	0.47768	1.24479	1.01731	1.51393	1.06482	0.804032	0.0186423	0.423991	0.701546	0.0951015
tca-mir-3805b-3p	585	16503	1382	2198	2349	813	2880	3512	3684	2296	2043	1529	1331	182	49	77	83	26	137	168	173	114	71	55	49	1	0.335995	0.288287	0.315596	0.176467	4.12087	5.21595	4.88559	4.23347	0.266821	0.378555	0.451594	0.00458627
tca-mir-3806a-3p	433	16503	1382	2198	2349	813	2880	3512	3684	2296	2043	1529	1331	182	29	65	71	17	96	117	119	77	48	44	44	5	0.0530962	0.880566	1.0631	0.0949721	2.34931	2.78491	2.35112	2.03866	0.112107	0.642456	1.32649	0.463584
tca-mir-3806a-5p	470	16503	1382	2198	2349	813	2880	3512	3684	2296	2043	1529	1331	182	31	60	65	19	119	141	142	98	60	45	36	5	0.0404578	0.216044	0.245223	0.10682	5.28471	5.5893	4.65538	4.94894	0.437198	0.432746	0.231273	0.3801
tca-mir-3807-3p	214	16503	1382	2198	2349	813	2880	3512	3684	2296	2043	1529	1331	182	23	24	31	11	54	68	73	48	22	25	24	4	1.06136	0.103032	0.386821	0.438332	2.83192	3.94266	4.59585	3.61533	0.0992333	1.03368	1.40982	1.05305
tca-mir-3808-3p	1328	16503	1382	2198	2349	813	2880	3512	3684	2296	2043	1529	1331	182	161	210	203	88	334	409	432	276	130	130	109	11	6.39413	2.561	0.926261	2.77341	13.2025	15	15	12.5183	0.000542806	0.639822	0.40205	0.0951971
tca-mir-3808-5p	323	16503	1382	2198	2349	813	2880	3512	3684	2296	2043	1529	1331	182	43	43	48	21	84	98	112	64	28	31	33	5	3.04384	0.336612	0.472694	1.10684	4.42653	4.35954	6.96338	2.91851	0.0093308	0.430045	1.17951	0.83071
tca-mir-3809-5p	957	16503	1382	2198	2349	813	2880	3512	3684	2296	2043	1529	1331	182	106	158	162	61	204	258	281	172	97	89	68	8	2.94575	2.81853	2.15443	1.79094	3.18586	5.16271	7.16206	3.91144	0.006667	0.34064	0.0672923	0.133699
tca-mir-3810-3p	479	16503	1382	2198	2349	813	2880	3512	3684	2296	2043	1529	1331	182	47	76	75	27	117	153	162	103	54	30	35	3	0.958757	1.35573	0.781531	0.701559	4.44956	7.89687	8.74631	5.78564	0.126433	0.00450022	0.156482	0.108922
tca-mir-3810-5p	535	16503	1382	2198	2349	813	2880	3512	3684	2296	2043	1529	1331	182	56	82	81	34	128	152	157	106	55	39	47	3	1.45581	1.12496	0.605419	1.27159	4.3417	4.53006	4.31741	4.29256	0.0331471	0.0268486	0.623604	0.0728331
tca-mir-3811c-1-5p	288	16503	1382	2198	2349	813	2880	3512	3684	2296	2043	1529	1331	182	22	42	43	15	74	86	89	64	44	24	25	3	0.203382	0.635785	0.482663	0.460338	3.82671	3.67192	3.58847	4.38177	1.23266	0.177286	0.519725	0.405933
tca-mir-3811c-2-5p	288	16503	1382	2198	2349	813	2880	3512	3684	2296	2043	1529	1331	182	22	42	43	15	74	86	89	64	44	24	25	3	0.203382	0.635785	0.482663	0.460338	3.82671	3.67192	3.58847	4.38177	1.23266	0.177286	0.519725	0.405933
tca-mir-3811d-5p	483	16503	1382	2198	2349	813	2880	3512	3684	2296	2043	1529	1331	182	41	71	73	29	135	164	169	113	58	37	34	6	0.374588	0.783542	0.581541	0.943332	8.6428	10.6587	10.3908	8.33944	0.247478	0.0567285	0.112289	0.545469
tca-mir-3811e-5p	439	16503	1382	2198	2349	813	2880	3512	3684	2296	2043	1529	1331	182	38	65	68	22	95	127	135	77	47	38	38	6	0.428368	0.800428	0.696488	0.386465	2.02925	4.29927	4.882	1.8966	0.074248	0.19759	0.544067	0.673972
tca-mir-3812-3p	167	16503	1382	2198	2349	813	2880	3512	3684	2296	2043	1529	1331	182	10	21	24	5	44	53	48	34	20	17	19	1	0.0777149	0.254281	0.371038	0.0773549	2.85771	3.25674	1.69149	2.10449	0.296942	0.545584	1.31543	0.258009
tca-mir-3812-5p	586	16503	1382	2198	2349	813	2880	3512	3684	2296	2043	1529	1331	182	57	95	89	35	123	152	172	101	80	61	42	5	0.990252	1.76309	0.63856	0.994129	1.97819	2.58941	4.65913	2.0486	0.810157	0.829358	0.115656	0.200273
tca-mir-3813-3p	196	16503	1382	2198	2349	813	2880	3512	3684	2296	2043	1529	1331	182	19	26	29	12	41	58	66	36	23	18	17	2	0.682239	0.340341	0.440165	0.768372	1.06513	2.65072	4.05044	1.50374	0.255068	0.343542	0.498496	0.434816
tca-mir-3813-5p	2017	16503	1382	2198	2349	813	2880	3512	3684	2296	2043	1529	1331	182	178	304	319	97	452	540	552	355	287	204	162	25	0.689438	2.17784	1.8368	0.239246	9.32728	9.85393	8.26765	6.54507	2.44303	1.12212	0.298937	0.646855
tca-mir-3814-3p	178	16503	1382	2198	2349	813	2880	3512	3684	2296	2043	1529	1331	182	7	22	31	5	47	54	53	36	27	14	17	4	0.00660766	0.224831	1.0243	0.0568961	3.01538	2.78792	2.10931	2.13365	0.966723	0.162081	0.722809	1.3238
tca-mir-3814-5p	2547	16503	1382	2198	2349	813	2880	3512	3684	2296	2043	1529	1331	182	261	417	443	154	526	644	684	411	331	259	217	24	3.90241	6.20819	6.28259	2.62137	5.62381	7.25067	8.72619	3.63653	0.839049	1.38273	0.771102	0.115055
tca-mir-3815-3p	296	16503	1382	2198	2349	813	2880	3512	3684	2296	2043	1529	1331	182	27	48	49	12	66	73	72	49	40	26	21	2	0.558271	1.20978	0.959716	0.152247	1.89442	1.16737	0.739517	1.08699	0.615226	0.24872	0.162625	0.19578
tca-mir-3815-5p	104	16503	1382	2198	2349	813	2880	3512	3684	2296	2043	1529	1331	182	7	12	12	4	25	35	36	25	12	13	10	0	0.186425	0.193248	0.133603	0.231842	1.48799	2.94238	2.85733	2.74758	0.275885	1.00386	0.665012	0.163957
tca-mir-3816-3p	202	16503	1382	2198	2349	813	2880	3512	3684	2296	2043	1529	1331	182	13	29	29	6	49	57	63	39	24	14	11	1	0.0933375	0.540146	0.36579	0.0581705	2.27821	2.13095	2.89596	1.9041	0.273318	0.0709952	0.0466738	0.183377
tca-mir-3816-5p	283	16503	1382	2198	2349	813	2880	3512	3684	2296	2043	1529	1331	182	31	39	37	18	59	75	83	47	24	21	16	1	1.29955	0.43436	0.168837	0.972073	1.23907	1.84573	2.65162	1.0854	0.0102868	0.0781034	0.0347303	0.0849516
tca-mir-3817-3p	1803	16503	1382	2198	2349	813	2880	3512	3684	2296	2043	1529	1331	182	177	277	294	101	417	501	538	339	202	175	142	18	2.0228	2.4617	2.41468	1.13157	10.5298	11.8384	15	9.43816	0.0255089	0.634202	0.220598	0.208273
tca-mir-3818-5p	499	16503	1382	2198	2349	813	2880	3512	3684	2296	2043	1529	1331	182	52	80	79	25	113	138	150	95	55	45	36	3	1.36824	1.48625	0.867401	0.384607	2.96755	3.60964	4.7432	3.29883	0.0938427	0.269362	0.136887	0.0944496
tca-mir-3820-5p	520	16503	1382	2198	2349	813	2880	3512	3684	2296	2043	1529	1331	182	48	82	84	28	113	132	150	91	68	51	47	9	0.676787	1.35951	1.03498	0.568376	2.33918	2.01176	3.76888	2.08734	0.545726	0.523147	0.743953	1.20278
tca-mir-3821-3p	484	16503	1382	2198	2349	813	2880	3512	3684	2296	2043	1529	1331	182	51	78	76	26	93	120	130	76	59	41	43	5	1.42777	1.51134	0.802775	0.554861	0.864813	1.5877	2.13771	0.950012	0.286757	0.156488	0.65402	0.352378
tca-mir-3822-3p	3428	16503	1382	2198	2349	813	2880	3512	3684	2296	2043	1529	1331	182	298	500	520	172	715	861	942	576	463	339	310	30	0.67038	2.15967	1.42591	0.430201	8.55575	9.27292	15	7.51907	1.92704	1.12827	2.05325	0.0396143
tca-mir-3824-3p	388	16503	1382	2198	2349	813	2880	3512	3684	2296	2043	1529	1331	182	30	62	63	15	89	107	120	67	42	29	29	2	0.196503	1.2701	0.94596	0.0956981	2.66852	2.92983	4.55759	1.60333	0.0943765	0.0579178	0.204901	0.0941977
tca-mir-3824-5p	1987	16503	1382	2198	2349	813	2880	3512	3684	2296	2043	1529	1331	182	215	322	329	130	424	526	546	347	205	180	184	18	4.69233	4.46372	3.07702	3.58957	6.0825	8.80018	8.45657	6.05913	0.000591225	0.212091	1.74704	0.108141
tca-mir-3825-3p	85	16503	1382	2198	2349	813	2880	3512	3684	2296	2043	1529	1331	182	7	11	12	4	17	21	23	12	10	10	9	2	0.377182	0.335658	0.360528	0.388606	0.660361	0.742174	0.920302	0.395507	0.312984	0.792554	0.836583	1.16965
tca-mir-3825-5p	795	16503	1382	2198	2349	813	2880	3512	3684	2296	2043	1529	1331	182	70	123	129	45	182	219	240	153	78	89	80	11	0.524241	1.4995	1.33332	0.841385	4.6026	5.15137	7.2897	5.10375	0.00531585	1.58748	1.7805	0.77275
tca-mir-3826-3p	159	16503	1382	2198	2349	813	2880	3512	3684	2296	2043	1529	1331	182	12	21	23	8	33	46	44	30	18	21	14	0	0.238116	0.338513	0.385589	0.416382	0.93849	2.07204	1.34542	1.50991	0.220417	1.43279	0.521109	0.0809374
tca-mir-3826-5p	106	16503	1382	2198	2349	813	2880	3512	3684	2296	2043	1529	1331	182	6	9	16	4	23	27	28	17	16	16	6	1	0.0999068	0.0396667	0.472679	0.219412	0.990844	0.916951	0.886681	0.667302	0.800429	1.75544	0.118548	0.485899
tca-mir-3827-3p	384	16503	1382	2198	2349	813	2880	3512	3684	2296	2043	1529	1331	182	38	61	65	20	81	108	118	68	44	34	38	3	0.920353	1.21808	1.24261	0.465857	1.57624	3.2782	4.35911	1.84393	0.168908	0.2462	1.09705	0.211172
tca-mir-3827-5p	340	16503	1382	2198	2349	813	2880	3512	3684	2296	2043	1529	1331	182	28	50	57	16	72	92	107	56	41	36	19	2	0.312222	0.702239	1.10211	0.29194	1.50812	2.36933	4.5034	1.1238	0.274732	0.765683	0.0223185	0.138183
tca-mir-3828-3p	295	16503	1382	2198	2349	813	2880	3512	3684	2296	2043	1529	1331	182	34	48	51	22	69	82	80	56	30	27	19	0	1.64183	1.23058	1.23725	1.69298	2.45376	2.5268	1.67399	2.23853	0.0657488	0.322573	0.0851677	0.0163031
tca-mir-3828-5p	280	16503	1382	2198	2349	813	2880	3512	3684	2296	2043	1529	1331	182	27	41	42	18	58	70	73	40	34	29	26	2	0.728108	0.648001	0.496924	1.005	1.18394	1.2505	1.23823	0.412528	0.298428	0.645963	0.719595	0.222179
tca-mir-3829-5p	282	16503	1382	2198	2349	813	2880	3512	3684	2296	2043	1529	1331	182	27	39	39	14	57	63	77	43	24	34	22	2	0.704885	0.445034	0.270889	0.379141	1.0148	0.52153	1.70527	0.644478	0.010817	1.34008	0.292839	0.218693
tca-mir-3831-3p	331	16503	1382	2198	2349	813	2880	3512	3684	2296	2043	1529	1331	182	38	46	44	20	65	84	91	55	47	37	32	5	1.7252	0.46769	0.183455	0.848665	0.887233	1.51993	1.97069	1.17071	0.86509	1.00907	0.920641	0.796203
tca-mir-3832-3p	999	16503	1382	2198	2349	813	2880	3512	3684	2296	2043	1529	1331	182	101	148	162	62	220	265	287	181	110	95	80	12	1.70341	1.15195	1.51549	1.59286	4.25067	4.72049	6.36232	4.27816	0.0430909	0.436852	0.303184	0.509915
tca-mir-3832-5p	293	16503	1382	2198	2349	813	2880	3512	3684	2296	2043	1529	1331	182	30	45	42	20	68	80	86	55	32	41	36	5	0.979662	0.880957	0.357399	1.25861	2.34388	2.26391	2.72984	2.11082	0.12703	2.53387	2.36576	0.974626
tca-mir-3833-3p	379	16503	1382	2198	2349	813	2880	3512	3684	2296	2043	1529	1331	182	34	56	63	20	93	108	115	77	36	34	19	1	0.52882	0.750214	1.09732	0.494419	3.78367	3.50715	4.01415	3.69369	0.0206421	0.271923	0.00577436	0.0342432
tca-mir-3833-5p	297	16503	1382	2198	2349	813	2880	3512	3684	2296	2043	1529	1331	182	24	38	39	16	68	89	95	58	39	32	25	4	0.283985	0.248366	0.171664	0.528052	2.19893	3.82878	4.39735	2.57126	0.511753	0.804237	0.443559	0.636425
tca-mir-3834-3p	198	16503	1382	2198	2349	813	2880	3512	3684	2296	2043	1529	1331	182	19	29	30	13	44	57	58	36	25	18	17	3	0.655683	0.601004	0.506956	0.953087	1.47362	2.32974	2.07332	1.44411	0.392303	0.326373	0.477631	0.755574
tca-mir-3835-3p	276	16503	1382	2198	2349	813	2880	3512	3684	2296	2043	1529	1331	182	22	34	40	16	66	76	88	52	40	31	20	6	0.266112	0.186978	0.388273	0.691316	2.6257	2.28644	4.08283	2.06806	0.910356	0.960457	0.191831	1.47345
tca-mir-3835-5p	272	16503	1382	2198	2349	813	2880	3512	3684	2296	2043	1529	1331	182	28	30	34	14	61	78	91	50	33	29	23	2	0.975062	0.0710328	0.115299	0.438888	1.85686	2.84158	5.10201	1.81894	0.297784	0.742744	0.452265	0.236695
tca-mir-3836a-3p	231	16503	1382	2198	2349	813	2880	3512	3684	2296	2043	1529	1331	182	50	54	47	26	41	58	63	35	20	24	22	2	10.0166	5.01579	2.39637	4.55144	0.386098	1.17092	1.50838	0.592306	0.0207933	0.629323	0.764634	0.327848
tca-mir-3836a-5p	159	16503	1382	2198	2349	813	2880	3512	3684	2296	2043	1529	1331	182	12	23	19	8	44	48	56	36	17	15	15	2	0.238116	0.543306	0.120133	0.416382	3.34534	2.52317	4.17298	3.01634	0.158846	0.394941	0.673644	0.591324
tca-mir-3836b-3p	231	16503	1382	2198	2349	813	2880	3512	3684	2296	2043	1529	1331	182	50	54	47	26	41	58	63	35	20	24	22	2	10.0166	5.01579	2.39637	4.55144	0.386098	1.17092	1.50838	0.592306	0.0207933	0.629323	0.764634	0.327848
tca-mir-3836b-5p	212	16503	1382	2198	2349	813	2880	3512	3684	2296	2043	1529	1331	182	22	34	42	14	45	57	57	39	29	20	21	1	0.920231	0.984914	2.01964	0.992646	1.19638	1.69015	1.31877	1.58059	0.614541	0.390199	0.875615	0.166578
tca-mir-3838-3p	515	16503	1382	2198	2349	813	2880	3512	3684	2296	2043	1529	1331	182	51	87	84	29	105	139	150	86	60	64	53	7	1.04352	2.11235	1.10966	0.711833	1.46063	3.1437	3.98679	1.52762	0.176402	2.20089	1.55487	0.678827
tca-mir-3838-5p	403	16503	1382	2198	2349	813	2880	3512	3684	2296	2043	1529	1331	182	40	74	79	28	100	117	125	84	36	33	26	1	0.953011	2.82096	2.96668	1.5729	4.20528	4.09752	4.77732	4.35974	0.00748018	0.128567	0.0612504	0.0272285
tca-mir-3839-5p	434	16503	1382	2198	2349	813	2880	3512	3684	2296	2043	1529	1331	182	42	75	79	27	107	133	130	88	47	36	30	4	0.852451	2.1523	2.08338	1.05451	4.31626	5.85877	4.14424	4.0683	0.0859107	0.137416	0.103997	0.280724
tca-mir-3840-3p	277	16503	1382	2198	2349	813	2880	3512	3684	2296	2043	1529	1331	182	59	65	55	37	68	82	90	60	29	24	21	3	11.3016	5.89809	2.42593	7.99153	2.99629	3.40848	4.49761	3.83406	0.0916654	0.232156	0.249774	0.437473
tca-mir-3840-5p	104	16503	1382	2198	2349	813	2880	3512	3684	2296	2043	1529	1331	182	7	12	12	4	25	35	36	25	12	13	10	0	0.186425	0.193248	0.133603	0.231842	1.48799	2.94238	2.85733	2.74758	0.275885	1.00386	0.665012	0.163957
tca-mir-3841-3p	209	16503	1382	2198	2349	813	2880	3512	3684	2296	2043	1529	1331	182	44	44	36	24	43	57	71	37	19	16	17	0	8.55008	3.17598	1.03666	4.42714	0.997043	1.81436	4.42851	1.31129	0.0385752	0.125662	0.375363	0.0443362
tca-mir-3841-5p	200	16503	1382	2198	2349	813	2880	3512	3684	2296	2043	1529	1331	182	17	32	37	13	50	52	58	37	21	21	13	1	0.386767	0.951561	1.43588	0.92764	2.59288	1.35018	1.97677	1.57012	0.122021	0.64138	0.126118	0.186947
tca-mir-3842-3p	345	16503	1382	2198	2349	813	2880	3512	3684	2296	2043	1529	1331	182	35	55	52	22	80	90	96	64	36	49	32	3	1.00115	1.1811	0.531366	1.0585	2.61061	1.88532	2.19489	2.2131	0.0716453	3.00994	0.759361	0.275621
tca-mir-3842-5p	240	16503	1382	2198	2349	813	2880	3512	3684	2296	2043	1529	1331	182	21	32	33	15	61	77	82	53	31	36	26	7	0.44309	0.346479	0.267227	0.866889	3.17583	4.50473	5.07576	3.71277	0.450797	2.84894	1.30962	2.2822
tca-mir-3843-3p	783	16503	1382	2198	2349	813	2880	3512	3684	2296	2043	1529	1331	182	110	150	144	58	169	216	223	135	82	71	55	4	7.7115	5.97713	3.40001	3.12719	3.00386	5.13536	4.82045	2.51166	0.0231687	0.262474	0.0713192	0.0282761
tca-mir-3843-5p	690	16503	1382	2198	2349	813	2880	3512	3684	2296	2043	1529	1331	182	59	102	104	40	173	213	225	148	87	64	62	7	0.399865	0.944803	0.619614	0.911524	6.99559	9.18782	10.0992	7.8752	0.400078	0.334564	0.786104	0.306537
tca-mir-3849-3p	341	16503	1382	2198	2349	813	2880	3512	3684	2296	2043	1529	1331	182	23	44	49	17	78	90	102	61	49	45	33	4	0.0750517	0.258569	0.36332	0.381065	2.39999	2.0227	3.40563	1.813	0.940921	2.21196	0.935641	0.489808
tca-mir-3849-5p	707	16503	1382	2198	2349	813	2880	3512	3684	2296	2043	1529	1331	182	66	103	117	44	181	212	229	142	80	62	52	3	0.807728	0.836579	1.47223	1.32947	7.99109	7.97519	9.95582	5.81779	0.100951	0.187364	0.133822	0.0197333
tca-mir-3850-3p	244	16503	1382	2198	2349	813	2880	3512	3684	2296	2043	1529	1331	182	23	28	31	10	66	80	79	55	25	23	21	2	0.633017	0.111732	0.142779	0.179258	4.21826	5.03149	4.00079	4.0699	0.0857506	0.386925	0.48981	0.295561
tca-mir-3851a-1-3p	719	16503	1382	2198	2349	813	2880	3512	3684	2296	2043	1529	1331	182	112	137	127	63	160	189	215	132	82	64	56	6	10.5217	5.39616	2.42927	5.50674	3.50264	3.35142	6.2672	3.5576	0.111963	0.219154	0.239696	0.164566
tca-mir-3851a-1-5p	529	16503	1382	2198	2349	813	2880	3512	3684	2296	2043	1529	1331	182	35	69	70	21	123	153	149	95	53	51	53	3	0.0347053	0.264672	0.13968	0.0844091	3.64383	5.00381	3.24184	2.47409	0.0226753	0.460736	1.36883	0.0760802
tca-mir-3851a-2-3p	719	16503	1382	2198	2349	813	2880	3512	3684	2296	2043	1529	1331	182	112	137	127	63	160	189	215	132	82	64	56	6	10.5217	5.39616	2.42927	5.50674	3.50264	3.35142	6.2672	3.5576	0.111963	0.219154	0.239696	0.164566
tca-mir-3851a-2-5p	529	16503	1382	2198	2349	813	2880	3512	3684	2296	2043	1529	1331	182	35	69	70	21	123	153	149	95	53	51	53	3	0.0347053	0.264672	0.13968	0.0844091	3.64383	5.00381	3.24184	2.47409	0.0226753	0.460736	1.36883	0.0760802
tca-mir-3851b-3p	276	16503	1382	2198	2349	813	2880	3512	3684	2296	2043	1529	1331	182	56	58	50	31	64	82	99	59	27	23	18	1	9.90682	3.87894	1.54152	5.20612	2.24217	3.46335	7.07315	3.62219	0.049173	0.180833	0.098753	0.0907522
tca-mir-3851b-5p	529	16503	1382	2198	2349	813	2880	3512	3684	2296	2043	1529	1331	182	35	69	70	21	123	153	149	95	53	51	53	3	0.0347053	0.264672	0.13968	0.0844091	3.64383	5.00381	3.24184	2.47409	0.0226753	0.460736	1.36883	0.0760802
tca-mir-3851c-3p	276	16503	1382	2198	2349	813	2880	3512	3684	2296	2043	1529	1331	182	56	58	50	31	64	82	99	59	27	23	18	1	9.90682	3.87894	1.54152	5.20612	2.24217	3.46335	7.07315	3.62219	0.049173	0.180833	0.098753	0.0907522
tca-mir-3851c-5p	529	16503	1382	2198	2349	813	2880	3512	3684	2296	2043	1529	1331	182	35	69	70	21	123	153	149	95	53	51	53	3	0.0347053	0.264672	0.13968	0.0844091	3.64383	5.00381	3.24184	2.47409	0.0226753	0.460736	1.36883	0.0760802
tca-mir-3851d-3p	187	16503	1382	2198	2349	813	2880	3512	3684	2296	2043	1529	1331	182	14	24	27	8	49	57	55	37	18	16	17	3	0.21597	0.280073	0.379812	0.238978	3.02632	2.95041	2.04282	2.01362	0.0699416	0.244048	0.601996	0.817281
tca-mir-3851d-5p	276	16503	1382	2198	2349	813	2880	3512	3684	2296	2043	1529	1331	182	56	58	50	31	64	82	99	59	27	23	18	1	9.90682	3.87894	1.54152	5.20612	2.24217	3.46335	7.07315	3.62219	0.049173	0.180833	0.098753	0.0907522
tca-mir-3851e-3p	276	16503	1382	2198	2349	813	2880	3512	3684	2296	2043	1529	1331	182	56	58	50	31	64	82	99	59	27	23	18	1	9.90682	3.87894	1.54152	5.20612	2.24217	3.46335	7.07315	3.62219	0.049173	0.180833	0.098753	0.0907522
tca-mir-3851e-5p	134	16503	1382	2198	2349	813	2880	3512	3684	2296	2043	1529	1331	182	13	21	22	9	28	31	39	21	10	13	10	2	0.636026	0.758831	0.70976	0.902551	0.911339	0.58544	1.59108	0.633585	0.0212062	0.444454	0.282803	0.734411
tca-mir-3851f-3p	276	16503	1382	2198	2349	813	2880	3512	3684	2296	2043	1529	1331	182	56	58	50	31	64	82	99	59	27	23	18	1	9.90682	3.87894	1.54152	5.20612	2.24217	3.46335	7.07315	3.62219	0.049173	0.180833	0.098753	0.0907522
tca-mir-3851f-5p	134	16503	1382	2198	2349	813	2880	3512	3684	2296	2043	1529	1331	182	13	21	22	9	28	31	39	21	10	13	10	2	0.636026	0.758831	0.70976	0.902551	0.911339	0.58544	1.59108	0.633585	0.0212062	0.444454	0.282803	0.734411
tca-mir-3853-3p	1929	16503	1382	2198	2349	813	2880	3512	3684	2296	2043	1529	1331	182	167	300	305	93	412	507	539	343	236	198	170	18	0.524756	2.94743	1.77301	0.249458	5.96104	8.01397	9.53033	6.78638	0.248318	1.29543	1.03031	0.13408
tca-mir-3854-3p	186	16503	1382	2198	2349	813	2880	3512	3684	2296	2043	1529	1331	182	16	29	24	9	26	46	47	24	26	26	16	3	0.40913	0.816651	0.184453	0.361838	0.056384	0.967283	0.838112	0.217173	0.6674	1.89474	0.479894	0.823173
tca-mir-3854-5p	573	16503	1382	2198	2349	813	2880	3512	3684	2296	2043	1529	1331	182	56	85	81	26	111	161	166	96	64	48	53	12	1.01016	0.899428	0.303212	0.205123	1.00024	4.46859	4.19324	1.66509	0.0992784	0.127129	0.890638	1.95388
tca-mir-3855-3p	158	16503	1382	2198	2349	813	2880	3512	3684	2296	2043	1529	1331	182	15	22	28	7	26	35	36	22	24	13	12	1	0.60362	0.44772	1.05711	0.284153	0.235833	0.454461	0.397497	0.354826	0.930866	0.214486	0.290511	0.282193
tca-mir-3855-5p	336	16503	1382	2198	2349	813	2880	3512	3684	2296	2043	1529	1331	182	33	52	54	20	90	99	110	74	45	39	36	4	0.843165	0.974185	0.834181	0.804153	5.22748	3.85446	5.46694	4.77918	0.596824	1.22491	1.48544	0.504587
tca-mir-3857-5p	772	16503	1382	2198	2349	813	2880	3512	3684	2296	2043	1529	1331	182	67	108	128	37	160	194	208	128	94	87	59	6	0.459769	0.574363	1.5759	0.278297	2.15516	2.42789	3.07296	1.8614	0.265452	1.62965	0.193636	0.123116
tca-mir-3858a-1-3p	605	16503	1382	2198	2349	813	2880	3512	3684	2296	2043	1529	1331	182	43	80	84	20	144	182	180	113	67	65	42	3	0.0661091	0.302504	0.243433	0.0141839	4.66227	7.06461	5.22549	3.4407	0.084379	1.04239	0.0806368	0.0433752
tca-mir-3858a-1-5p	258	16503	1382	2198	2349	813	2880	3512	3684	2296	2043	1529	1331	182	19	41	49	14	65	77	85	51	20	13	11	0	0.170894	1.01739	1.87804	0.53573	3.21666	3.36934	4.5453	2.4683	0.00486299	0.00357289	0.0047997	0.0249935
tca-mir-3859-3p	1962	16503	1382	2198	2349	813	2880	3512	3684	2296	2043	1529	1331	182	198	321	335	122	402	520	543	323	219	168	151	15	2.73446	4.79456	4.12487	2.57923	4.04217	8.78009	8.91021	3.54527	0.0188765	0.0629333	0.141396	0.03329
tca-mir-3859-5p	167	16503	1382	2198	2349	813	2880	3512	3684	2296	2043	1529	1331	182	14	20	23	8	40	47	53	34	24	18	13	4	0.368784	0.189595	0.289386	0.356528	1.90898	1.86789	2.75277	2.10449	0.741108	0.688879	0.318109	1.42288
tca-mir-3860-5p	264	16503	1382	2198	2349	813	2880	3512	3684	2296	2043	1529	1331	182	31	42	43	16	68	82	87	60	26	17	11	0	1.66191	1.03355	0.833348	0.802304	3.6208	4.17508	4.63562	4.46727	0.0555711	0.0282348	0.00366263	0.0233148
tca-mir-3861-5p	731	16503	1382	2198	2349	813	2880	3512	3684	2296	2043	1529	1331	182	67	103	120	38	147	185	191	112	90	80	75	8	0.712096	0.610793	1.40463	0.488361	1.60194	2.48408	2.24824	0.921753	0.305826	1.29735	1.89216	0.380647
tca-mir-3862-3p	299	16503	1382	2198	2349	813	2880	3512	3684	2296	2043	1529	1331	182	32	49	55	20	68	80	82	52	31	25	27	1	1.2064	1.28848	1.74848	1.18464	2.12901	2.02781	1.81853	1.44222	0.0779543	0.178232	0.638584	0.07305
tca-mir-3862-5p	234	16503	1382	2198	2349	813	2880	3512	3684	2296	2043	1529	1331	182	16	33	31	8	46	56	63	39	43	30	22	4	0.11659	0.496179	0.203526	0.0860829	0.788722	0.851078	1.40069	1.01945	2.53572	1.56967	0.725993	0.930652
tca-mir-3864-3p	384	16503	1382	2198	2349	813	2880	3512	3684	2296	2043	1529	1331	182	27	57	53	13	86	107	116	74	44	39	30	1	0.0937933	0.778181	0.250686	0.0424956	2.30223	3.09907	3.95299	2.8921	0.168908	0.622104	0.279436	0.0326493
tca-mir-3865-5p	305	16503	1382	2198	2349	813	2880	3512	3684	2296	2043	1529	1331	182	31	46	47	20	69	78	91	54	37	29	27	3	0.961752	0.799814	0.608632	1.11437	2.09464	1.53018	3.08767	1.6056	0.292806	0.405779	0.579705	0.36167
tca-mir-3866-5p	196	16503	1382	2198	2349	813	2880	3512	3684	2296	2043	1529	1331	182	23	33	33	12	47	59	62	44	20	19	16	0	1.41616	1.20295	0.899851	0.768372	2.11882	2.87691	3.03562	3.3985	0.101387	0.444983	0.383076	0.0517344
tca-mir-3867-5p	545	16503	1382	2198	2349	813	2880	3512	3684	2296	2043	1529	1331	182	75	104	110	47	96	132	145	80	56	58	50	5	5.18456	4.31521	4.35409	4.15336	0.364339	1.38767	2.14751	0.560677	0.0318967	0.935711	0.830215	0.25212
tca-mir-3869-3p	419	16503	1382	2198	2349	813	2880	3512	3684	2296	2043	1529	1331	182	57	74	84	35	85	114	117	69	39	32	25	2	4.01071	2.36827	3.42086	3.06373	1.25626	2.84467	2.56949	1.24315	0.0123939	0.0651589	0.0275266	0.0733485
tca-mir-3872-5p	362	16503	1382	2198	2349	813	2880	3512	3684	2296	2043	1529	1331	182	32	45	44	19	88	114	119	70	40	36	34	6	0.481576	0.181222	0.0664602	0.480784	3.47998	5.77415	5.94114	2.81922	0.122823	0.540685	0.822589	0.973119
tca-mir-3877-5p	199	16503	1382	2198	2349	813	2880	3512	3684	2296	2043	1529	1331	182	23	35	34	10	49	52	52	42	21	26	21	5	1.351	1.47685	0.975122	0.40722	2.41468	1.38645	1.06952	2.71669	0.126803	1.54667	1.09073	1.63569
tca-mir-3880-3p	244	16503	1382	2198	2349	813	2880	3512	3684	2296	2043	1529	1331	182	19	34	30	13	59	70	72	49	25	26	19	3	0.240984	0.462328	0.107841	0.498789	2.5469	2.63765	2.4764	2.54659	0.0857506	0.718864	0.297552	0.548231
tca-mir-3880-5p	213	16503	1382	2198	2349	813	2880	3512	3684	2296	2043	1529	1331	182	21	32	40	14	46	53	56	38	28	18	11	1	0.74685	0.701624	1.59229	0.979945	1.31787	1.06441	1.14734	1.37332	0.494344	0.218803	0.0309761	0.164989
tca-mir-3881-3p	565	16503	1382	2198	2349	813	2880	3512	3684	2296	2043	1529	1331	182	47	82	95	29	116	156	153	91	67	53	35	8	0.318227	0.745047	1.4615	0.441731	1.62955	3.9407	2.53817	1.23972	0.208013	0.371289	0.0235644	0.762096
tca-mir-3881-5p	361	16503	1382	2198	2349	813	2880	3512	3684	2296	2043	1529	1331	182	27	57	50	14	74	91	92	58	46	36	36	2	0.158939	1.13857	0.262208	0.104095	1.25375	1.52186	1.1827	0.985833	0.422208	0.54964	1.10817	0.116918
tca-mir-3882-3p	341	16503	1382	2198	2349	813	2880	3512	3684	2296	2043	1529	1331	182	29	44	46	13	81	98	110	62	46	28	31	5	0.380757	0.258569	0.208332	0.0996828	2.94885	3.39733	5.13567	1.97783	0.62863	0.14583	0.681869	0.755126
tca-mir-3882-5p	463	16503	1382	2198	2349	813	2880	3512	3684	2296	2043	1529	1331	182	52	72	80	33	99	128	135	80	53	31	32	3	1.91384	1.16251	1.57208	1.87515	1.93824	3.39854	3.69019	1.78959	0.152768	0.0123083	0.0984365	0.121974
tca-mir-3883-3p	1326	16503	1382	2198	2349	813	2880	3512	3684	2296	2043	1529	1331	182	143	241	229	94	283	339	362	228	147	118	97	8	3.2331	7.12925	3.26178	3.90952	4.21249	4.37757	5.4234	3.7154	0.0326059	0.178468	0.0758686	0.0170712
tca-mir-3883-5p	393	16503	1382	2198	2349	813	2880	3512	3684	2296	2043	1529	1331	182	42	59	62	25	85	112	117	69	38	30	31	1	1.37189	0.849058	0.773605	1.10715	1.8834	3.60848	3.69374	1.78077	0.0242339	0.0697107	0.296983	0.0299614
tca-mir-3884-3p	102	16503	1382	2198	2349	813	2880	3512	3684	2296	2043	1529	1331	182	4	8	10	2	27	35	39	23	17	11	8	1	0.0285765	0.027619	0.0574227	0.0533318	2.10746	3.11786	4.06212	2.22067	1.12119	0.630877	0.356177	0.508007
tca-mir-3884-5p	237	16503	1382	2198	2349	813	2880	3512	3684	2296	2043	1529	1331	182	28	43	43	21	47	57	56	36	29	27	23	4	1.60273	1.87396	1.43006	2.48116	0.837835	0.885626	0.548327	0.604589	0.320915	0.966388	0.834515	0.913711
tca-mir-3889-3p	209	16503	1382	2198	2349	813	2880	3512	3684	2296	2043	1529	1331	182	44	44	36	24	43	57	71	37	19	16	17	0	8.55008	3.17598	1.03666	4.42714	0.997043	1.81436	4.42851	1.31129	0.0385752	0.125662	0.375363	0.0443362
tca-mir-3889-5p	712	16503	1382	2198	2349	813	2880	3512	3684	2296	2043	1529	1331	182	86	117	118	43	135	181	203	119	79	70	56	8	3.68088	2.19914	1.49595	1.14633	0.890452	2.53267	4.48543	1.87634	0.0743075	0.566872	0.263847	0.4132
tca-mir-3892-3p	1143	16503	1382	2198	2349	813	2880	3512	3684	2296	2043	1529	1331	182	115	174	176	61	236	295	298	188	127	117	101	5	1.79542	1.62485	0.94471	0.641204	2.77964	4.20173	3.07634	2.28431	0.0433431	0.954559	0.831587	0.00491807
tca-mir-3892-5p	109	16503	1382	2198	2349	813	2880	3512	3684	2296	2043	1529	1331	182	9	19	20	9	26	28	33	20	15	10	7	0	0.3664	1.07845	1.05153	1.37223	1.47875	0.965033	1.70063	1.13307	0.566627	0.36669	0.179756	0.153277
tca-mir-3893-3p	783	16503	1382	2198	2349	813	2880	3512	3684	2296	2043	1529	1331	182	110	150	144	58	169	216	223	135	82	71	55	4	7.7115	5.97713	3.40001	3.12719	3.00386	5.13536	4.82045	2.51166	0.0231687	0.262474	0.0713192	0.0282761
tca-mir-3893-5p	276	16503	1382	2198	2349	813	2880	3512	3684	2296	2043	1529	1331	182	19	31	40	11	76	91	89	63	29	28	23	3	0.106476	0.0831302	0.388273	0.147206	5.01708	5.70872	4.32036	4.70603	0.0949355	0.577965	0.41963	0.440462
tca-mir-3897-5p	984	16503	1382	2198	2349	813	2880	3512	3684	2296	2043	1529	1331	182	87	148	153	49	222	272	290	179	116	101	84	10	0.569334	1.32342	0.982916	0.366065	4.99984	6.36914	7.53947	4.33761	0.155308	0.915066	0.577536	0.278987
tca-mir-3905-3p	357	16503	1382	2198	2349	813	2880	3512	3684	2296	2043	1529	1331	182	41	58	66	24	77	99	116	60	35	30	25	2	1.80675	1.34406	2.00378	1.30833	1.74369	2.8529	5.53664	1.30219	0.0341739	0.170062	0.133029	0.120706
tca-mir-6007-3p	263	16503	1382	2198	2349	813	2880	3512	3684	2296	2043	1529	1331	182	20	26	30	9	77	90	88	68	33	21	9	0	0.205107	0.0246609	0.048824	0.0756996	6.18318	6.4489	4.96697	7.10969	0.375937	0.139862	0.000722736	0.0235864
tca-mir-6007-5p	498	16503	1382	2198	2349	813	2880	3512	3684	2296	2043	1529	1331	182	45	67	62	27	107	137	157	92	58	50	44	6	0.581423	0.364794	0.0638443	0.584246	2.1018	3.4823	6.25341	2.79234	0.178197	0.613441	0.636054	0.50724
tca-mir-6012-3p	160	16503	1382	2198	2349	813	2880	3512	3684	2296	2043	1529	1331	182	16	24	22	11	41	49	50	33	23	18	14	2	0.734343	0.649574	0.288871	1.0127	2.47865	2.70234	2.48843	2.15376	0.733528	0.805317	0.509044	0.586327
tca-mir-6012-5p	292	16503	1382	2198	2349	813	2880	3512	3684	2296	2043	1529	1331	182	28	44	45	17	61	76	84	48	35	27	33	2	0.716725	0.783952	0.602997	0.711396	1.27484	1.67682	2.41845	1.03708	0.269451	0.343628	1.7147	0.202069
tca-mir-6016-3p	97	16503	1382	2198	2349	813	2880	3512	3684	2296	2043	1529	1331	182	10	17	18	8	28	29	30	23	10	10	5	1	0.727414	1.05103	1.04828	1.30541	2.75268	1.7803	1.74422	2.51688	0.175037	0.543624	0.0945491	0.537481
tca-mir-6016-5p	529	16503	1382	2198	2349	813	2880	3512	3684	2296	2043	1529	1331	182	49	83	86	31	104	136	150	85	53	48	37	2	0.695766	1.32471	1.09611	0.871629	1.09881	2.24845	3.39769	1.17747	0.0226753	0.281178	0.0983651	0.0295163
tca-mir-6017-3p	638	16503	1382	2198	2349	813	2880	3512	3684	2296	2043	1529	1331	182	61	97	98	35	124	157	171	101	83	68	53	8	0.917621	1.15312	0.729613	0.656583	1.08526	1.76374	2.54949	1.15156	0.542923	1.0115	0.426737	0.564877
tca-mir-6018-5p	133	16503	1382	2198	2349	813	2880	3512	3684	2296	2043	1529	1331	182	12	24	18	8	32	37	45	23	11	12	10	2	0.492569	1.33941	0.274798	0.678933	1.7045	1.55006	3.0998	0.97088	0.0408602	0.334692	0.291426	0.740961
tca-mir-7-3p	599	16503	1382	2198	2349	813	2880	3512	3684	2296	2043	1529	1331	182	64	105	95	39	130	169	166	104	57	60	45	9	1.74011	2.93083	0.949331	1.50236	2.56238	4.76007	3.16737	2.18211	0.00670829	0.631472	0.180273	0.897158
tca-mir-7-5p	410	16503	1382	2198	2349	813	2880	3512	3684	2296	2043	1529	1331	182	42	66	76	26	97	117	114	74	42	40	42	4	1.13356	1.36845	2.22609	1.11356	3.30834	3.75852	2.45716	2.14077	0.047132	0.487037	1.34201	0.324441
tca-mir-71-3p	281	16503	1382	2198	2349	813	2880	3512	3684	2296	2043	1529	1331	182	27	48	49	13	62	67	77	43	26	27	22	1	0.716421	1.55123	1.26761	0.282436	1.72917	0.887715	1.74151	0.658866	0.027293	0.430391	0.298937	0.0865698
tca-mir-71-5p	503	16503	1382	2198	2349	813	2880	3512	3684	2296	2043	1529	1331	182	40	69	64	22	115	144	164	93	51	50	42	7	0.224135	0.438798	0.0858766	0.1707	3.1662	4.51247	7.57385	2.82578	0.0298926	0.573083	0.435761	0.715554
tca-mir-750-3p	251	16503	1382	2198	2349	813	2880	3512	3684	2296	2043	1529	1331	182	17	31	32	11	48	68	75	35	24	24	27	2	0.103777	0.19811	0.144601	0.23326	0.67035	1.95566	2.70567	0.347552	0.0453553	0.417706	1.30161	0.279562
tca-mir-750-5p	241	16503	1382	2198	2349	813	2880	3512	3684	2296	2043	1529	1331	182	24	38	40	15	62	66	74	52	26	23	13	1	0.807766	0.948734	0.899389	0.856042	3.36311	2.02809	3.03846	3.39889	0.130799	0.413312	0.0328511	0.126357
tca-mir-8-3p	1341	16503	1382	2198	2349	813	2880	3512	3684	2296	2043	1529	1331	182	186	266	277	120	302	369	392	243	132	97	88	8	12.1918	11.8733	11.0787	10.5173	6.51494	8.20634	9.52751	5.53859	0.000640226	0.00150141	0.00782982	0.0155429
tca-mir-8-5p	556	16503	1382	2198	2349	813	2880	3512	3684	2296	2043	1529	1331	182	49	76	79	31	128	170	176	104	53	40	46	6	0.497726	0.42823	0.321664	0.691211	3.56772	7.17523	7.04391	3.25108	0.00862616	0.0209002	0.409978	0.381655
tca-mir-87a-3p	546	16503	1382	2198	2349	813	2880	3512	3684	2296	2043	1529	1331	182	54	91	97	30	117	157	167	97	55	52	40	3	1.06313	2.01956	2.08829	0.637769	2.19496	4.96041	5.68172	2.36903	0.0232414	0.419818	0.14929	0.0672139
tca-mir-87a-5p	181	16503	1382	2198	2349	813	2880	3512	3684	2296	2043	1529	1331	182	15	23	24	12	35	46	50	30	20	17	11	0	0.348021	0.265394	0.223719	0.952674	0.661631	1.12582	1.42519	0.897255	0.181146	0.384634	0.0970769	0.0619214
tca-mir-87b-3p	546	16503	1382	2198	2349	813	2880	3512	3684	2296	2043	1529	1331	182	54	91	97	30	117	157	167	97	55	52	40	3	1.06313	2.01956	2.08829	0.637769	2.19496	4.96041	5.68172	2.36903	0.0232414	0.419818	0.14929	0.0672139
tca-mir-87b-5p	218	16503	1382	2198	2349	813	2880	3512	3684	2296	2043	1529	1331	182	19	30	33	10	44	58	61	35	25	26	21	3	0.433734	0.424666	0.510342	0.291132	0.905887	1.6176	1.70316	0.811944	0.213218	1.13438	0.78888	0.656395
tca-mir-927a-3p	411	16503	1382	2198	2349	813	2880	3512	3684	2296	2043	1529	1331	182	41	74	71	21	81	107	116	67	45	45	28	5	0.986912	2.5873	1.46651	0.426208	0.997631	2.08141	2.72514	1.15124	0.101803	0.988474	0.0962027	0.521216
tca-mir-927a-5p	946	16503	1382	2198	2349	813	2880	3512	3684	2296	2043	1529	1331	182	79	131	131	45	223	274	290	182	104	91	85	6	0.318222	0.535846	0.211013	0.251921	6.46951	8.43467	9.43891	5.92749	0.0450384	0.489244	0.887269	0.0443531
tca-mir-927b-3p	149	16503	1382	2198	2349	813	2880	3512	3684	2296	2043	1529	1331	182	15	22	23	9	32	32	40	27	21	21	16	4	0.739607	0.594134	0.540559	0.698877	1.08431	0.36697	1.10434	1.23711	0.660015	1.71771	1.03568	1.60621
tca-mir-927b-5p	946	16503	1382	2198	2349	813	2880	3512	3684	2296	2043	1529	1331	182	79	131	131	45	223	274	290	182	104	91	85	6	0.318222	0.535846	0.211013	0.251921	6.46951	8.43467	9.43891	5.92749	0.0450384	0.489244	0.887269	0.0443531
tca-mir-929-3p	335	16503	1382	2198	2349	813	2880	3512	3684	2296	2043	1529	1331	182	36	54	61	20	83	99	102	67	30	25	24	3	1.29801	1.24266	1.77311	0.812898	3.61184	3.90777	3.71681	3.12955	0.0128091	0.06802	0.162448	0.295016
tca-mir-929-5p	1010	16503	1382	2198	2349	813	2880	3512	3684	2296	2043	1529	1331	182	95	160	169	58	208	264	287	171	110	86	82	7	0.992743	2.12769	2.02763	1.01373	2.47212	4.22183	5.91559	2.64736	0.033469	0.105378	0.351753	0.0580757
tca-mir-92a-3p	1086	16503	1382	2198	2349	813	2880	3512	3684	2296	2043	1529	1331	182	129	177	195	74	248	311	324	209	130	100	102	10	4.80021	2.81748	3.75372	2.74693	5.93583	8.9126	8.99388	6.72406	0.19171	0.301044	1.34574	0.181381
tca-mir-92a-5p	124	16503	1382	2198	2349	813	2880	3512	3684	2296	2043	1529	1331	182	14	22	17	9	36	49	52	32	19	11	11	3	1.02379	1.21581	0.298224	1.06795	3.32957	5.94819	6.53521	3.86955	0.887708	0.317114	0.525939	1.31443
tca-mir-92b-3p	1086	16503	1382	2198	2349	813	2880	3512	3684	2296	2043	1529	1331	182	129	177	195	74	248	311	324	209	130	100	102	10	4.80021	2.81748	3.75372	2.74693	5.93583	8.9126	8.99388	6.72406	0.19171	0.301044	1.34574	0.181381
tca-mir-92b-5p	175	16503	1382	2198	2349	813	2880	3512	3684	2296	2043	1529	1331	182	19	25	21	11	50	60	67	41	18	18	18	1	1.01922	0.515891	0.11504	0.808685	4.05694	4.65521	6.26962	3.644	0.117339	0.573295	0.946139	0.238428
tca-mir-92c-3p	1086	16503	1382	2198	2349	813	2880	3512	3684	2296	2043	1529	1331	182	129	177	195	74	248	311	324	209	130	100	102	10	4.80021	2.81748	3.75372	2.74693	5.93583	8.9126	8.99388	6.72406	0.19171	0.301044	1.34574	0.181381
tca-mir-92c-5p	175	16503	1382	2198	2349	813	2880	3512	3684	2296	2043	1529	1331	182	19	25	21	11	50	60	67	41	18	18	18	1	1.01922	0.515891	0.11504	0.808685	4.05694	4.65521	6.26962	3.644	0.117339	0.573295	0.946139	0.238428
tca-mir-932-3p	221	16503	1382	2198	2349	813	2880	3512	3684	2296	2043	1529	1331	182	25	36	40	15	57	61	63	43	31	22	28	7	1.31204	1.08336	1.36258	1.09682	3.19126	2.00575	1.91206	2.08105	0.709479	0.509028	2.19926	2.49703
tca-mir-932-5p	530	16503	1382	2198	2349	813	2880	3512	3684	2296	2043	1529	1331	182	51	91	94	36	115	128	144	84	67	55	48	4	0.88824	2.37457	2.02559	1.68002	2.34614	1.33099	2.48831	1.06217	0.404035	0.78336	0.758043	0.155316
tca-mir-965-3p	289	16503	1382	2198	2349	813	2880	3512	3684	2296	2043	1529	1331	182	30	48	51	19	65	75	80	47	27	30	27	2	1.03711	1.36114	1.37344	1.09984	1.95915	1.63529	1.89185	0.969266	0.028702	0.658482	0.747173	0.206919
tca-mir-965-5p	448	16503	1382	2198	2349	813	2880	3512	3684	2296	2043	1529	1331	182	41	64	61	23	104	125	139	86	50	43	35	3	0.616701	0.610601	0.209953	0.437485	3.17713	3.51241	5.22392	3.17673	0.117979	0.439015	0.271578	0.135536
tca-mir-970-3p	353	16503	1382	2198	2349	813	2880	3512	3684	2296	2043	1529	1331	182	40	57	65	24	82	106	113	68	45	40	35	4	1.6928	1.28895	1.94665	1.35582	2.67924	4.4355	5.0788	2.71772	0.423012	1.11195	1.0673	0.456069
tca-mir-970-5p	114	16503	1382	2198	2349	813	2880	3512	3684	2296	2043	1529	1331	182	12	14	16	7	33	38	37	27	12	9	12	0	0.802852	0.250206	0.339013	0.699181	3.10482	3.02569	2.35042	2.78918	0.175922	0.207818	0.890018	0.14341
tca-mir-980-3p	186	16503	1382	2198	2349	813	2880	3512	3684	2296	2043	1529	1331	182	16	28	22	7	39	50	54	34	24	18	12	2	0.40913	0.684781	0.0984168	0.153412	1.05485	1.56679	1.90138	1.43189	0.44183	0.440945	0.128202	0.471945
tca-mir-980-5p	127	16503	1382	2198	2349	813	2880	3512	3684	2296	2043	1529	1331	182	11	11	14	6	36	44	44	29	11	13	12	2	0.425905	0.0325484	0.0872813	0.360544	3.11222	3.78857	3.30096	2.66266	0.0574732	0.541961	0.650205	0.781824
tca-mir-981-3p	424	16503	1382	2198	2349	813	2880	3512	3684	2296	2043	1529	1331	182	39	68	68	20	124	130	132	93	43	34	37	4	0.628078	1.36124	0.897947	0.282153	9.33111	5.759	5.08573	5.69231	0.0395614	0.102695	0.568351	0.298211
tca-mir-981-5p	303	16503	1382	2198	2349	813	2880	3512	3684	2296	2043	1529	1331	182	24	32	32	13	85	96	97	71	40	33	25	2	0.250411	0.0395598	0.0155294	0.196403	5.85778	5.12896	4.48719	5.61503	0.531608	0.855105	0.397944	0.185239
tca-mir-989-3p	420	16503	1382	2198	2349	813	2880	3512	3684	2296	2043	1529	1331	182	34	49	55	18	94	111	126	80	49	38	41	6	0.268854	0.0835059	0.14012	0.165738	2.43857	2.34623	4.0745	2.90908	0.193742	0.284578	1.06507	0.738037
tca-mir-989-5p	246	16503	1382	2198	2349	813	2880	3512	3684	2296	2043	1529	1331	182	21	37	36	11	65	85	87	55	30	23	17	1	0.391689	0.735175	0.414628	0.254866	3.84073	6.34845	6.03374	3.96896	0.312562	0.3701	0.153836	0.120507
tca-mir-993-3p	206	16503	1382	2198	2349	813	2880	3512	3684	2296	2043	1529	1331	182	18	26	31	10	51	56	65	40	24	18	18	1	0.438463	0.246251	0.489116	0.360475	2.53271	1.76692	3.10892	1.97471	0.240639	0.264605	0.516754	0.176452
tca-mir-993-5p	275	16503	1382	2198	2349	813	2880	3512	3684	2296	2043	1529	1331	182	24	44	45	14	71	81	91	57	33	22	27	1	0.439501	1.08553	0.869544	0.420186	3.77524	3.30263	4.88646	3.17364	0.274809	0.137694	0.923341	0.0916127
tca-mir-995-3p	312	16503	1382	2198	2349	813	2880	3512	3684	2296	2043	1529	1331	182	37	45	49	20	60	76	81	47	37	30	28	2	1.90538	0.602194	0.697189	1.03684	0.743997	1.09232	1.26879	0.608594	0.244609	0.434158	0.62462	0.172512
tca-mir-995-5p	282	16503	1382	2198	2349	813	2880	3512	3684	2296	2043	1529	1331	182	26	39	36	13	62	69	81	43	37	21	22	3	0.584942	0.445034	0.136566	0.277931	1.69811	1.07748	2.34037	0.644478	0.50541	0.080517	0.292839	0.422837
tca-mir-998-3p	312	16503	1382	2198	2349	813	2880	3512	3684	2296	2043	1529	1331	182	37	45	49	20	60	76	81	47	37	30	28	2	1.90538	0.602194	0.697189	1.03684	0.743997	1.09232	1.26879	0.608594	0.244609	0.434158	0.62462	0.172512
tca-mir-998-5p	677	16503	1382	2198	2349	813	2880	3512	3684	2296	2043	1529	1331	182	66	120	123	34	150	182	203	120	75	51	50	4	1.07234	3.43556	2.81037	0.389106	3.24291	3.78386	6.05168	2.72395	0.0762563	0.0274731	0.143456	0.0593951
tca-mir-9a-3p	783	16503	1382	2198	2349	813	2880	3512	3684	2296	2043	1529	1331	182	110	150	144	58	169	216	223	135	82	71	55	4	7.7115	5.97713	3.40001	3.12719	3.00386	5.13536	4.82045	2.51166	0.0231687	0.262474	0.0713192	0.0282761
tca-mir-9a-5p	652	16503	1382	2198	2349	813	2880	3512	3684	2296	2043	1529	1331	182	96	138	120	58	170	207	217	147	61	58	47	4	7.83589	8.21606	2.96743	5.33753	8.158	10.1301	10.6876	9.37015	0.00355628	0.223704	0.113675	0.0703208
tca-mir-9b-3p	783	16503	1382	2198	2349	813	2880	3512	3684	2296	2043	1529	1331	182	110	150	144	58	169	216	223	135	82	71	55	4	7.7115	5.97713	3.40001	3.12719	3.00386	5.13536	4.82045	2.51166	0.0231687	0.262474	0.0713192	0.0282761
tca-mir-9b-5p	1024	16503	1382	2198	2349	813	2880	3512	3684	2296	2043	1529	1331	182	115	175	185	73	244	296	312	200	116	91	70	6	3.36246	3.79747	3.73798	3.2542	7.44062	8.96732	9.7831	6.94516	0.0742589	0.192429	0.0332232	0.0270706
tca-mir-9c-3p	127	16503	1382	2198	2349	813	2880	3512	3684	2296	2043	1529	1331	182	13	20	19	6	36	46	46	31	13	14	12	2	0.75394	0.763438	0.457438	0.360544	3.11222	4.46635	3.92753	3.30884	0.143449	0.705913	0.650205	0.781824
tca-mir-9c-5p	652	16503	1382	2198	2349	813	2880	3512	3684	2296	2043	1529	1331	182	96	138	120	58	170	207	217	147	61	58	47	4	7.83589	8.21606	2.96743	5.33753	8.158	10.1301	10.6876	9.37015	0.00355628	0.223704	0.113675	0.0703208
tca-mir-9d-3p	783	16503	1382	2198	2349	813	2880	3512	3684	2296	2043	1529	1331	182	110	150	144	58	169	216	223	135	82	71	55	4	7.7115	5.97713	3.40001	3.12719	3.00386	5.13536	4.82045	2.51166	0.0231687	0.262474	0.0713192	0.0282761
tca-mir-9d-5p	652	16503	1382	2198	2349	813	2880	3512	3684	2296	2043	1529	1331	182	96	138	120	58	170	207	217	147	61	58	47	4	7.83589	8.21606	2.96743	5.33753	8.158	10.1301	10.6876	9.37015	0.00355628	0.223704	0.113675	0.0703208
tca-mir-9e-3p	783	16503	1382	2198	2349	813	2880	3512	3684	2296	2043	1529	1331	182	110	150	144	58	169	216	223	135	82	71	55	4	7.7115	5.97713	3.40001	3.12719	3.00386	5.13536	4.82045	2.51166	0.0231687	0.262474	0.0713192	0.0282761
tca-mir-9e-5p	652	16503	1382	2198	2349	813	2880	3512	3684	2296	2043	1529	1331	182	96	138	120	58	170	207	217	147	61	58	47	4	7.83589	8.21606	2.96743	5.33753	8.158	10.1301	10.6876	9.37015	0.00355628	0.223704	0.113675	0.0703208
tca-mir-iab-4-3p	140	16503	1382	2198	2349	813	2880	3512	3684	2296	2043	1529	1331	182	15	23	24	10	36	45	47	27	10	12	12	4	0.900939	0.939992	0.871763	1.06978	2.3035	3.02761	3.11266	1.54067	0.0143435	0.268113	0.468913	1.70952
tca-mir-iab-4-5p	307	16503	1382	2198	2349	813	2880	3512	3684	2296	2043	1529	1331	182	37	58	56	18	82	101	109	69	26	27	15	0	2.01276	2.66595	1.69917	0.739744	4.79517	6.18092	7.41492	4.82446	0.00804521	0.248419	0.00865091	0.0142022
tca-mir-iab-8-3p	192	16503	1382	2198	2349	813	2880	3512	3684	2296	2043	1529	1331	182	20	25	34	12	43	55	62	36	20	25	17	2	0.90273	0.3046	1.14562	0.814124	1.50734	2.22704	3.29627	1.62884	0.119004	1.49901	0.542499	0.449266
tca-mir-iab-8-5p	660	16503	1382	2198	2349	813	2880	3512	3684	2296	2043	1529	1331	182	78	119	118	47	153	195	205	128	74	61	57	7	3.12616	3.71712	2.48199	2.34753	4.27265	6.87521	7.35257	4.55453	0.0932857	0.324216	0.580184	0.352846

## Sheet: DESeq-miRanda
Supplementary Table 3b. MicroRNA target enrichment in down-, up- and not- regulated protein-coding genes between oocytes and 8-16 h, 16-24 h and 24-48h intervals. Data is obained using the miRanda prediction method, and differential expression is estimated by the DESeq algorithm. Shading of columns showing targets enrichment p-values reflects increasingly significant estimates.
	number of targets in all genes	number of all genes	numbers of down-regulated genes (fold difference >2; p<0.05) between oocytes and				numbers of up-regulated genes (fold difference >2; p<0.05) between oocytes and				numbers of notregulated genes (fold difference <2; p>0.05) between oocytes and				numbers of microRNA targets within down-regulated genes (fold difference >2; p<0.05) between oocytes and				numbers of microRNA targets within up-regulated genes (fold difference >2; p<0.05) between oocytes and				numbers of microRNA targets within notregulated genes (fold difference <2; p>0.05) between oocytes and				-LOG10 p-value of microRNA target enrichment within down-regulated genes (fold difference >2; p<0.05) between oocytes and				-LOG10 p-value of microRNA target enrichment within up-regulated genes (fold difference >2; p<0.05) between oocytes and				-LOG10 p-value of microRNA target enrichment within notregulated genes (fold difference <2; p>0.05) between oocytes and
			8-16 h	16-24 h	24-48 h	all	8-16 h	16-24 h	24-48 h	all	8-16 h	16-24 h	24-48 h	all	8-16 h	16-24 h	24-48 h	all	8-16 h	16-24 h	24-48 h	all	8-16 h	16-24 h	24-48 h	all	8-16 h	16-24 h	24-48 h	all	8-16 h	16-24 h	24-48 h	all	8-16 h	16-24 h	24-48 h	all
	total.targets	total.genes	e816.down	e1624.down	e2448.down	inters.down	e816.up	e1624.up	e2448.up	inters.up	e816.non	e1624.non	e2448.non	inters.non	e816.down.tar	e1624.down.tar	e2448.down.targ	inters.down.tar	e816.up.tar	e1624.up.tar	e2448.up.tar	inters.up.tar	e816.non.tar	e1624.non.tar	e2448.non.tar	inters.non.tar	LOGhyper.816.down	LOGhyper.1624.down	LOGhyper.2448.down	LOGhyper.inters.down	LOGhyper.816.up	LOGhyper.1624.up	LOGhyper.2448.up	LOGhyper.inters.up	LOGhyper.816.non	LOGhyper.1624.non	LOGhyper.2448.non	LOGhyper.inters.non
tca-mir-3851m-1-3p	256	16503	1382	2198	2349	813	2880	3512	3684	2296	2043	1529	1331	182	47	54	53	31	55	68	78	46	36	26	19	5	7.05451	3.71751	2.77204	5.90961	1.40871	1.76083	3.04828	1.56915	0.750044	0.573761	0.226832	1.18992
tca-mir-3851m-1-5p	557	16503	1382	2198	2349	813	2880	3512	3684	2296	2043	1529	1331	182	57	87	88	33	125	155	174	100	72	53	52	9	1.31122	1.31891	0.891232	0.936595	3.04291	4.10191	6.54335	2.56185	0.498891	0.417332	0.932968	1.04908
tca-mir-11617c-3p	597	16503	1382	2198	2349	813	2880	3512	3684	2296	2043	1529	1331	182	63	96	101	32	119	152	148	96	75	70	53	5	1.62159	1.6868	1.57884	0.568437	1.31781	2.26324	1.18716	1.26055	0.382419	1.77328	0.689464	0.188126
tca-mir-11617c-5p	553	16503	1382	2198	2349	813	2880	3512	3684	2296	2043	1529	1331	182	58	80	83	31	128	159	174	102	69	45	44	4	1.49943	0.719636	0.56266	0.709673	3.67178	5.01113	6.77593	2.98945	0.356861	0.0955301	0.302699	0.13427
tca-mir-11617e-5p	429	16503	1382	2198	2349	813	2880	3512	3684	2296	2043	1529	1331	182	40	62	65	26	109	130	132	90	57	38	33	4	0.68364	0.661491	0.578322	0.939736	4.98521	5.46562	4.8058	4.7225	0.595433	0.24025	0.244701	0.289342
tca-mir-11617f-1-5p	364	16503	1382	2198	2349	813	2880	3512	3684	2296	2043	1529	1331	182	37	53	50	20	93	111	114	69	45	38	30	3	1.03378	0.668135	0.242412	0.588774	4.48062	4.92933	4.63678	2.56293	0.333257	0.721956	0.395309	0.242144
tca-mir-3836i-1-3p	242	16503	1382	2198	2349	813	2880	3512	3684	2296	2043	1529	1331	182	39	38	34	18	53	64	71	41	22	20	20	4	4.61148	0.929322	0.312111	1.51225	1.5222	1.65867	2.38512	1.12831	0.0300891	0.182367	0.402429	0.886231
tca-mir-3836i-1-5p	285	16503	1382	2198	2349	813	2880	3512	3684	2296	2043	1529	1331	182	22	42	40	13	72	82	87	55	34	26	24	2	0.217792	0.67773	0.303959	0.264778	3.50896	2.9925	3.33341	2.3656	0.261374	0.317499	0.4437	0.213567
tca-mir-11617f-2-5p	364	16503	1382	2198	2349	813	2880	3512	3684	2296	2043	1529	1331	182	37	53	50	20	93	111	114	69	45	38	30	3	1.03378	0.668135	0.242412	0.588774	4.48062	4.92933	4.63678	2.56293	0.333257	0.721956	0.395309	0.242144
tca-mir-3836i-2-3p	242	16503	1382	2198	2349	813	2880	3512	3684	2296	2043	1529	1331	182	39	38	34	18	53	64	71	41	22	20	20	4	4.61148	0.929322	0.312111	1.51225	1.5222	1.65867	2.38512	1.12831	0.0300891	0.182367	0.402429	0.886231
tca-mir-3836i-2-5p	285	16503	1382	2198	2349	813	2880	3512	3684	2296	2043	1529	1331	182	22	42	40	13	72	82	87	55	34	26	24	2	0.217792	0.67773	0.303959	0.264778	3.50896	2.9925	3.33341	2.3656	0.261374	0.317499	0.4437	0.213567
tca-mir-11641-5p	1230	16503	1382	2198	2349	813	2880	3512	3684	2296	2043	1529	1331	182	154	215	206	92	246	322	349	191	151	125	90	7	7.01174	5.17597	2.35355	4.70469	2.14884	5.07227	6.9978	1.37694	0.280866	0.921234	0.0820036	0.0150768
tca-mir-276b-3p	271	16503	1382	2198	2349	813	2880	3512	3684	2296	2043	1529	1331	182	36	42	44	18	69	89	93	55	19	24	24	3	2.6708	0.9021	0.825009	1.10952	3.50318	5.52422	5.7224	2.86767	0.00118631	0.26746	0.569373	0.455726
tca-mir-276b-5p	134	16503	1382	2198	2349	813	2880	3512	3684	2296	2043	1529	1331	182	18	24	22	9	28	28	36	24	16	17	9	0	1.79285	1.3061	0.70976	0.902551	0.911339	0.306808	1.05909	1.12497	0.304311	1.15792	0.188671	0.110648
tca-mir-3851g-3-3p	301	16503	1382	2198	2349	813	2880	3512	3684	2296	2043	1529	1331	182	50	64	61	32	64	77	86	55	46	29	26	6	6.03138	4.34834	2.82468	4.83465	1.44557	1.52181	2.36901	1.87748	1.26171	0.438488	0.509305	1.30428
tca-mir-11642-3p	574	16503	1382	2198	2349	813	2880	3512	3684	2296	2043	1529	1331	182	63	89	89	35	146	178	193	122	64	52	46	5	1.95552	1.27021	0.766716	1.08818	6.41855	7.96654	10.0132	6.4099	0.0968737	0.273744	0.319573	0.214335
tca-mir-11642-5p	902	16503	1382	2198	2349	813	2880	3512	3684	2296	2043	1529	1331	182	104	167	171	59	182	229	246	148	106	65	67	6	3.51418	5.61335	4.63478	1.96743	1.89074	2.99075	3.85738	1.89708	0.154004	0.00621809	0.129295	0.0580142
tca-mir-3836c-1-3p	157	16503	1382	2198	2349	813	2880	3512	3684	2296	2043	1529	1331	182	22	25	28	14	30	43	43	25	22	14	13	3	2.2289	0.853618	1.08459	1.96848	0.598485	1.57267	1.26364	0.707489	0.650216	0.309587	0.411159	1.01803
tca-mir-3836c-1-5p	278	16503	1382	2198	2349	813	2880	3512	3684	2296	2043	1529	1331	182	18	40	40	12	63	78	75	52	38	31	30	5	0.0692016	0.57854	0.368133	0.209852	1.99273	2.55785	1.56184	2.00667	0.650503	0.930673	1.3867	1.05631
tca-mir-11624b-2-3p	257	16503	1382	2198	2349	813	2880	3512	3684	2296	2043	1529	1331	182	22	30	26	6	58	75	79	49	26	22	30	2	0.396934	0.12422	0.0135655	0.0121942	1.85575	2.994	3.20332	2.09012	0.0730203	0.220661	1.80379	0.26656
tca-mir-11643-3p	206	16503	1382	2198	2349	813	2880	3512	3684	2296	2043	1529	1331	182	23	35	32	12	58	64	71	47	20	19	19	1	1.20863	1.28471	0.589501	0.663743	4.34967	3.45697	4.6657	3.74334	0.0667022	0.349178	0.649956	0.176452
tca-mir-11643-5p	142	16503	1382	2198	2349	813	2880	3512	3684	2296	2043	1529	1331	182	17	22	19	14	29	37	41	23	17	19	14	6	1.29989	0.733014	0.253986	2.36204	0.830808	1.15709	1.57971	0.74604	0.305062	1.41576	0.766836	2.99705
tca-mir-6016b-3p	195	16503	1382	2198	2349	813	2880	3512	3684	2296	2043	1529	1331	182	27	32	31	15	35	49	53	25	23	15	16	2	2.46433	1.06442	0.66322	1.49784	0.416706	1.08812	1.34887	0.204509	0.263472	0.135711	0.391957	0.43838
tca-mir-6016b-5p	120	16503	1382	2198	2349	813	2880	3512	3684	2296	2043	1529	1331	182	8	7	8	2	29	33	33	25	14	17	17	1	0.165228	0.00288656	0.00338849	0.027249	1.63928	1.39128	1.139	1.87918	0.2793	1.55755	2.12162	0.417394
tca-mir-11644-3p	111	16503	1382	2198	2349	813	2880	3512	3684	2296	2043	1529	1331	182	10	12	11	4	34	40	43	30	11	16	9	1	0.487716	0.135358	0.0542968	0.191027	3.68475	3.95657	4.53892	4.09173	0.133966	1.57611	0.391571	0.459939
tca-mir-11644-5p	381	16503	1382	2198	2349	813	2880	3512	3684	2296	2043	1529	1331	182	31	48	54	14	86	116	123	73	38	41	27	5	0.283665	0.202054	0.321168	0.071818	2.39913	5.07605	5.65586	2.79389	0.0378378	0.870599	0.139513	0.611092
tca-mir-307b-3p	154	16503	1382	2198	2349	813	2880	3512	3684	2296	2043	1529	1331	182	11	13	21	5	34	42	50	25	15	13	8	0	0.18993	0.0183981	0.277388	0.11008	1.25635	1.52315	2.88346	0.771138	0.0927168	0.243571	0.0544678	0.0860905
tca-mir-307b-5p	406	16503	1382	2198	2349	813	2880	3512	3684	2296	2043	1529	1331	182	29	47	50	15	90	111	119	74	46	42	41	7	0.102056	0.0786223	0.0689243	0.068948	2.2463	2.86806	3.44454	2.24572	0.147055	0.706007	1.24503	1.09124
tca-mir-927c-3p	614	16503	1382	2198	2349	813	2880	3512	3684	2296	2043	1529	1331	182	69	111	104	38	127	163	172	110	78	62	43	8	2.30979	3.56407	1.61984	1.20492	1.82022	3.19533	3.49831	2.71311	0.428288	0.675669	0.0874581	0.623857
tca-mir-927c-5p	398	16503	1382	2198	2349	813	2880	3512	3684	2296	2043	1529	1331	182	42	53	56	21	90	115	119	68	37	52	37	4	1.29816	0.333588	0.299189	0.49626	2.49944	3.94818	3.82754	1.52639	0.0138206	2.34619	0.804165	0.348666
tca-mir-11645-5p	128	16503	1382	2198	2349	813	2880	3512	3684	2296	2043	1529	1331	182	13	15	17	6	21	28	30	17	18	11	8	1	0.736013	0.189099	0.251087	0.352556	0.245605	0.414374	0.47505	0.284555	0.63408	0.277841	0.146514	0.383527
tca-mir-11646-3p	424	16503	1382	2198	2349	813	2880	3512	3684	2296	2043	1529	1331	182	42	54	53	22	117	140	154	98	55	43	34	3	0.962209	0.217251	0.079634	0.460118	7.27444	8.32061	10.944	7.07848	0.492972	0.63107	0.329194	0.160237
tca-mir-11646-5p	740	16503	1382	2198	2349	813	2880	3512	3684	2296	2043	1529	1331	182	64	93	105	37	178	221	244	148	71	68	67	9	0.443798	0.149137	0.31155	0.377817	5.88797	8.11913	11.4524	5.92067	0.00399573	0.303871	0.851987	0.522275
tca-mir-11647-3p	868	16503	1382	2198	2349	813	2880	3512	3684	2296	2043	1529	1331	182	79	124	132	52	205	235	248	161	102	95	71	10	0.711315	0.74429	0.732268	1.21029	6.06282	4.89935	5.39297	4.4185	0.156742	1.42861	0.378708	0.441499
tca-mir-11648-3p	176	16503	1382	2198	2349	813	2880	3512	3684	2296	2043	1529	1331	182	20	25	24	11	45	51	55	40	14	16	23	1	1.20188	0.500889	0.269541	0.796508	2.6185	2.22774	2.65506	3.28649	0.0181567	0.331654	2.11233	0.236097
tca-mir-11648-5p	1027	16503	1382	2198	2349	813	2880	3512	3684	2296	2043	1529	1331	182	133	189	179	68	214	266	283	169	119	99	75	10	6.9706	6.08195	2.8689	2.28495	2.7794	3.96037	4.69368	2.12458	0.112875	0.507409	0.0935698	0.233446
tca-mir-3851n-1-3p	236	16503	1382	2198	2349	813	2880	3512	3684	2296	2043	1529	1331	182	47	51	50	30	49	61	68	42	31	26	16	4	8.21744	3.8348	2.88767	6.21249	1.1084	1.4223	2.11871	1.43146	0.497822	0.83086	0.141395	0.91932
tca-mir-3851n-1-5p	534	16503	1382	2198	2349	813	2880	3512	3684	2296	2043	1529	1331	182	54	81	80	31	124	150	164	100	71	51	52	8	1.19864	1.03957	0.548768	0.835722	3.64216	4.21112	5.71224	3.17335	0.63203	0.428595	1.17446	0.863679
tca-mir-3851p-3p	386	16503	1382	2198	2349	813	2880	3512	3684	2296	2043	1529	1331	182	66	75	70	44	96	110	117	83	43	36	28	6	8.15609	3.5868	1.89107	7.14507	4.11094	3.55782	4.04794	4.83361	0.127681	0.357546	0.165043	0.867913
tca-mir-3851p-5p	286	16503	1382	2198	2349	813	2880	3512	3684	2296	2043	1529	1331	182	29	48	47	13	68	81	87	57	34	21	24	2	0.928257	1.43022	0.905564	0.260512	2.61455	2.75018	3.27916	2.74886	0.254422	0.0712282	0.435656	0.211885
tca-mir-11617d-2-5p	364	16503	1382	2198	2349	813	2880	3512	3684	2296	2043	1529	1331	182	37	53	50	20	93	111	114	69	45	38	30	3	1.03378	0.668135	0.242412	0.588774	4.48062	4.92933	4.63678	2.56293	0.333257	0.721956	0.395309	0.242144
tca-mir-3836j-3p	222	16503	1382	2198	2349	813	2880	3512	3684	2296	2043	1529	1331	182	46	45	39	24	47	61	66	41	20	20	16	5	8.64824	2.86452	1.17692	3.99577	1.20534	1.96208	2.41886	1.65148	0.0322716	0.306291	0.204221	1.43556
tca-mir-11617d-3-5p	364	16503	1382	2198	2349	813	2880	3512	3684	2296	2043	1529	1331	182	37	53	50	20	93	111	114	69	45	38	30	3	1.03378	0.668135	0.242412	0.588774	4.48062	4.92933	4.63678	2.56293	0.333257	0.721956	0.395309	0.242144
tca-mir-3851l-4-3p	298	16503	1382	2198	2349	813	2880	3512	3684	2296	2043	1529	1331	182	50	60	60	32	66	79	81	55	32	31	24	4	6.16626	3.45034	2.72157	4.92527	1.83074	1.90984	1.71037	1.96256	0.1081	0.670884	0.347932	0.632639
tca-mir-3851l-4-5p	469	16503	1382	2198	2349	813	2880	3512	3684	2296	2043	1529	1331	182	51	76	77	32	107	132	136	85	59	38	45	6	1.64778	1.53785	1.11373	1.59554	2.96629	3.84258	3.59763	2.40013	0.384472	0.104536	1.0185	0.583584
tca-mir-11649-3p	222	16503	1382	2198	2349	813	2880	3512	3684	2296	2043	1529	1331	182	21	39	42	13	52	60	70	39	33	24	17	1	0.631068	1.55846	1.68699	0.684642	2.05025	1.78879	3.27275	1.30185	0.956489	0.749048	0.278553	0.151387
tca-mir-11650-3p	112	16503	1382	2198	2349	813	2880	3512	3684	2296	2043	1529	1331	182	9	13	17	5	23	31	35	19	21	11	7	3	0.332839	0.191877	0.485728	0.32185	0.792605	1.38425	1.98189	0.847138	1.73765	0.465025	0.160688	1.45021
tca-mir-11617a-1-3p	506	16503	1382	2198	2349	813	2880	3512	3684	2296	2043	1529	1331	182	54	77	74	27	120	141	148	101	57	49	47	5	1.56451	1.03895	0.432318	0.53976	3.94818	3.83208	4.0399	4.25998	0.120921	0.474098	0.871319	0.312598
tca-mir-11617a-1-5p	364	16503	1382	2198	2349	813	2880	3512	3684	2296	2043	1529	1331	182	36	64	64	24	82	99	110	70	35	34	37	1	0.899188	2.10567	1.52546	1.22854	2.29866	2.56559	3.7989	2.75441	0.0261049	0.362032	1.2187	0.0394963
tca-mir-3836d-3p	205	16503	1382	2198	2349	813	2880	3512	3684	2296	2043	1529	1331	182	39	39	33	18	40	54	62	34	22	20	15	5	6.45524	2.10234	0.719588	2.21056	0.722377	1.47554	2.50726	0.942606	0.139699	0.459412	0.227469	1.58039
tca-mir-3836d-5p	362	16503	1382	2198	2349	813	2880	3512	3684	2296	2043	1529	1331	182	45	54	63	31	96	107	111	72	45	29	29	2	2.53568	0.789167	1.43079	2.98808	5.31382	4.15827	4.10841	3.22939	0.348367	0.115102	0.331632	0.115989
tca-mir-3836c-2-3p	205	16503	1382	2198	2349	813	2880	3512	3684	2296	2043	1529	1331	182	26	33	39	11	36	43	50	30	28	23	16	1	1.90332	0.989984	1.6537	0.506995	0.357494	0.299112	0.676976	0.472868	0.6055	0.859465	0.310408	0.178157
tca-mir-3836c-2-5p	278	16503	1382	2198	2349	813	2880	3512	3684	2296	2043	1529	1331	182	18	40	40	12	63	78	75	52	38	31	30	5	0.0692016	0.57854	0.368133	0.209852	1.99273	2.55785	1.56184	2.00667	0.650503	0.930673	1.3867	1.05631
tca-mir-11618a-1-3p	190	16503	1382	2198	2349	813	2880	3512	3684	2296	2043	1529	1331	182	19	27	31	14	48	58	70	39	22	19	18	3	0.767293	0.506253	0.756868	1.31169	2.62109	3.00457	5.7738	2.35956	0.237102	0.51213	0.711508	0.799896
tca-mir-11618a-1-5p	456	16503	1382	2198	2349	813	2880	3512	3684	2296	2043	1529	1331	182	39	65	70	23	114	140	157	95	46	33	45	3	0.395055	0.602416	0.65445	0.399362	4.83004	6.17146	9.13042	4.80821	0.032832	0.0326293	1.17083	0.128136
tca-mir-3851o-2-3p	254	16503	1382	2198	2349	813	2880	3512	3684	2296	2043	1529	1331	182	45	53	51	30	55	68	74	47	30	24	19	3	6.33442	3.54145	2.40838	5.52404	1.46712	1.83696	2.36889	1.80244	0.249534	0.391635	0.237544	0.511861
tca-mir-3851o-2-5p	276	16503	1382	2198	2349	813	2880	3512	3684	2296	2043	1529	1331	182	26	42	46	20	67	72	79	50	31	19	21	3	0.647981	0.816319	0.971338	1.48987	2.82945	1.64601	2.25912	1.70641	0.165963	0.0449164	0.255252	0.440462
tca-mir-3851k-1-3p	239	16503	1382	2198	2349	813	2880	3512	3684	2296	2043	1529	1331	182	45	50	48	29	52	63	70	45	32	27	17	4	7.13825	3.41934	2.31549	5.61684	1.45793	1.61464	2.34274	1.88539	0.557777	0.934073	0.184045	0.902608
tca-mir-3851k-1-5p	492	16503	1382	2198	2349	813	2880	3512	3684	2296	2043	1529	1331	182	46	75	80	28	110	134	143	86	58	42	43	5	0.723138	1.03894	1.06077	0.739983	2.71074	3.22861	3.79208	1.9983	0.203798	0.166692	0.591339	0.337398
tca-mir-11618b-1-3p	446	16503	1382	2198	2349	813	2880	3512	3684	2296	2043	1529	1331	182	54	77	87	34	90	119	135	73	61	43	33	5	2.62524	2.1799	3.11673	2.34355	1.2468	2.61296	4.50975	1.232	0.747311	0.453043	0.17951	0.432449
tca-mir-11618b-1-5p	458	16503	1382	2198	2349	813	2880	3512	3684	2296	2043	1529	1331	182	39	64	70	26	108	140	158	96	52	32	44	4	0.383119	0.510851	0.631771	0.716868	3.53486	6.05242	9.25397	4.96311	0.140588	0.0214306	1.01522	0.242623
tca-mir-11614-3p	132	16503	1382	2198	2349	813	2880	3512	3684	2296	2043	1529	1331	182	15	18	21	9	33	38	46	26	19	16	12	0	1.06904	0.403065	0.612909	0.93355	1.98452	1.80891	3.47518	1.61801	0.703207	0.988778	0.574355	0.113507
tca-mir-11614-5p	541	16503	1382	2198	2349	813	2880	3512	3684	2296	2043	1529	1331	182	43	73	67	25	122	149	158	100	64	60	47	4	0.218389	0.376031	0.0535034	0.235531	3.07083	3.74396	4.22248	2.97727	0.205267	1.20901	0.579827	0.144898
tca-mir-3836e-3p	230	16503	1382	2198	2349	813	2880	3512	3684	2296	2043	1529	1331	182	46	45	41	24	48	64	70	43	23	19	15	4	8.12794	2.54436	1.289	3.75126	1.12892	2.15082	2.80591	1.78345	0.0745682	0.186228	0.115224	0.953787
tca-mir-3836e-5p	339	16503	1382	2198	2349	813	2880	3512	3684	2296	2043	1529	1331	182	33	50	55	19	100	110	117	83	33	20	25	0	0.808229	0.715761	0.89138	0.632277	7.92142	6.3082	7.10533	7.28381	0.0342576	0.0066917	0.19666	0.00983961
tca-mir-11619e-3p	211	16503	1382	2198	2349	813	2880	3512	3684	2296	2043	1529	1331	182	16	32	29	8	48	59	68	38	18	13	19	0	0.21972	0.736276	0.273288	0.144069	1.71923	2.0889	3.50243	1.4288	0.0219577	0.030758	0.590018	0.0433005
tca-mir-11619e-5p	1633	16503	1382	2198	2349	813	2880	3512	3684	2296	2043	1529	1331	182	195	269	282	119	333	423	445	272	200	170	135	14	7.16143	4.29806	3.88465	5.36783	3.27986	5.97305	6.46639	3.38127	0.260339	1.35876	0.450122	0.0928199
tca-mir-3836c-3-3p	209	16503	1382	2198	2349	813	2880	3512	3684	2296	2043	1529	1331	182	39	38	32	16	42	58	64	37	26	18	19	4	6.22672	1.75579	0.543192	1.52927	0.868897	1.99409	2.70721	1.31129	0.359228	0.244091	0.613422	1.08645
tca-mir-3836c-3-5p	270	16503	1382	2198	2349	813	2880	3512	3684	2296	2043	1529	1331	182	16	34	36	8	65	76	76	52	29	30	29	5	0.037738	0.224569	0.203508	0.0360668	2.67373	2.55225	2.0124	2.26091	0.116657	0.905111	1.34068	1.10288
tca-mir-11618a-4-3p	190	16503	1382	2198	2349	813	2880	3512	3684	2296	2043	1529	1331	182	19	27	31	14	48	58	70	39	22	19	18	3	0.767293	0.506253	0.756868	1.31169	2.62109	3.00457	5.7738	2.35956	0.237102	0.51213	0.711508	0.799896
tca-mir-11618a-4-5p	351	16503	1382	2198	2349	813	2880	3512	3684	2296	2043	1529	1331	182	31	51	50	19	88	103	121	73	34	27	28	3	0.477562	0.651922	0.337382	0.549009	3.9704	3.90096	7.28334	3.8712	0.0304886	0.0839471	0.323936	0.264589
tca-mir-3851o-1-3p	254	16503	1382	2198	2349	813	2880	3512	3684	2296	2043	1529	1331	182	45	53	51	30	55	68	74	47	30	24	19	3	6.33442	3.54145	2.40838	5.52404	1.46712	1.83696	2.36889	1.80244	0.249534	0.391635	0.237544	0.511861
tca-mir-3851o-1-5p	301	16503	1382	2198	2349	813	2880	3512	3684	2296	2043	1529	1331	182	28	43	50	18	77	90	93	62	32	19	25	3	0.619852	0.560318	0.986914	0.792937	3.87939	3.82481	3.70823	3.30147	0.0979036	0.0181307	0.412711	0.371625
tca-mir-3851l-2-3p	298	16503	1382	2198	2349	813	2880	3512	3684	2296	2043	1529	1331	182	50	60	60	32	66	79	81	55	32	31	24	4	6.16626	3.45034	2.72157	4.92527	1.83074	1.90984	1.71037	1.96256	0.1081	0.670884	0.347932	0.632639
tca-mir-3851l-2-5p	469	16503	1382	2198	2349	813	2880	3512	3684	2296	2043	1529	1331	182	51	76	77	32	107	132	136	85	59	38	45	6	1.64778	1.53785	1.11373	1.59554	2.96629	3.84258	3.59763	2.40013	0.384472	0.104536	1.0185	0.583584
tca-mir-11618b-2-3p	446	16503	1382	2198	2349	813	2880	3512	3684	2296	2043	1529	1331	182	54	77	87	34	90	119	135	73	61	43	33	5	2.62524	2.1799	3.11673	2.34355	1.2468	2.61296	4.50975	1.232	0.747311	0.453043	0.17951	0.432449
tca-mir-11618b-2-5p	458	16503	1382	2198	2349	813	2880	3512	3684	2296	2043	1529	1331	182	39	64	70	26	108	140	158	96	52	32	44	4	0.383119	0.510851	0.631771	0.716868	3.53486	6.05242	9.25397	4.96311	0.140588	0.0214306	1.01522	0.242623
tca-mir-3836f-3p	234	16503	1382	2198	2349	813	2880	3512	3684	2296	2043	1529	1331	182	45	46	41	23	53	69	73	47	20	22	18	5	7.42706	2.62519	1.19007	3.25337	1.78717	2.95117	3.22566	2.47734	0.0178694	0.382101	0.281674	1.34274
tca-mir-3836f-5p	232	16503	1382	2198	2349	813	2880	3512	3684	2296	2043	1529	1331	182	23	40	44	17	61	74	70	48	21	19	19	0	0.783127	1.46247	1.7507	1.41546	3.59629	4.27089	2.69753	2.78907	0.031164	0.176151	0.385451	0.0338305
tca-mir-11619f-3p	312	16503	1382	2198	2349	813	2880	3512	3684	2296	2043	1529	1331	182	31	42	51	18	62	88	95	48	34	26	33	3	0.870289	0.367288	0.906043	0.697714	0.943462	2.85953	3.51993	0.702164	0.119339	0.170617	1.35146	0.344887
tca-mir-11619f-5p	786	16503	1382	2198	2349	813	2880	3512	3684	2296	2043	1529	1331	182	66	114	124	39	194	222	244	151	84	68	50	2	0.339316	0.836256	1.0239	0.357749	7.20741	6.05118	8.58743	5.00363	0.0341696	0.152859	0.0170432	0.00301205
tca-mir-11620-3p	55	16503	1382	2198	2349	813	2880	3512	3684	2296	2043	1529	1331	182	4	10	6	1	15	17	19	13	6	4	4	0	0.307165	0.969902	0.165172	0.118438	1.64395	1.49015	1.90322	1.78991	0.275874	0.232357	0.337933	0.339937
tca-mir-11620-5p	288	16503	1382	2198	2349	813	2880	3512	3684	2296	2043	1529	1331	182	30	42	36	13	70	85	89	53	26	18	24	3	1.05188	0.635785	0.110545	0.252155	2.93501	3.45528	3.58847	1.89373	0.0199605	0.0182896	0.41992	0.405933
tca-mir-11615-3p	164	16503	1382	2198	2349	813	2880	3512	3684	2296	2043	1529	1331	182	18	28	25	10	35	46	43	28	17	22	15	2	1.03367	1.18006	0.512823	0.730303	1.09536	1.81698	1.00518	0.994337	0.129278	1.53483	0.603892	0.566822
tca-mir-11615-5p	252	16503	1382	2198	2349	813	2880	3512	3684	2296	2043	1529	1331	182	16	34	40	13	62	78	84	51	23	21	16	0	0.067788	0.374539	0.702701	0.442883	2.82989	3.95942	4.71391	2.69198	0.0290473	0.188421	0.0903771	0.026796
tca-mir-3851k-2-3p	239	16503	1382	2198	2349	813	2880	3512	3684	2296	2043	1529	1331	182	45	50	48	29	52	63	70	45	32	27	17	4	7.13825	3.41934	2.31549	5.61684	1.45793	1.61464	2.34274	1.88539	0.557777	0.934073	0.184045	0.902608
tca-mir-3851k-2-5p	492	16503	1382	2198	2349	813	2880	3512	3684	2296	2043	1529	1331	182	46	75	80	28	110	134	143	86	58	42	43	5	0.723138	1.03894	1.06077	0.739983	2.71074	3.22861	3.79208	1.9983	0.203798	0.166692	0.591339	0.337398
tca-mir-11619b-3p	210	16503	1382	2198	2349	813	2880	3512	3684	2296	2043	1529	1331	182	17	25	31	14	56	66	68	45	23	17	16	2	0.30543	0.163304	0.435609	1.01848	3.54306	3.69757	3.56928	2.99349	0.158576	0.173137	0.275267	0.388101
tca-mir-11621-3p	784	16503	1382	2198	2349	813	2880	3512	3684	2296	2043	1529	1331	182	76	130	136	47	168	196	214	125	92	89	61	5	1.10663	2.50651	2.26798	1.15494	2.84638	2.34269	3.46843	1.36511	0.160957	1.72577	0.232341	0.0611309
tca-mir-11621-5p	661	16503	1382	2198	2349	813	2880	3512	3684	2296	2043	1529	1331	182	78	116	113	40	136	170	192	110	68	65	45	4	3.10687	3.17851	1.8153	1.11825	1.82891	2.64235	4.80422	1.73293	0.0229441	0.558849	0.0585075	0.0661911
tca-mir-11619a-3-3p	248	16503	1382	2198	2349	813	2880	3512	3684	2296	2043	1529	1331	182	25	38	41	15	53	68	72	39	28	22	18	4	0.859868	0.819186	0.88894	0.783322	1.34381	2.07995	2.28526	0.752379	0.181541	0.275401	0.202615	0.854451
tca-mir-11619a-3-5p	522	16503	1382	2198	2349	813	2880	3512	3684	2296	2043	1529	1331	182	51	86	74	27	126	134	152	104	65	48	52	5	0.968731	1.82325	0.314986	0.458825	4.47254	2.20236	4.02343	4.32791	0.350092	0.315302	1.31753	0.28633
tca-mir-11617a-2-3p	506	16503	1382	2198	2349	813	2880	3512	3684	2296	2043	1529	1331	182	54	77	74	27	120	141	148	101	57	49	47	5	1.56451	1.03895	0.432318	0.53976	3.94818	3.83208	4.0399	4.25998	0.120921	0.474098	0.871319	0.312598
tca-mir-11617a-2-5p	364	16503	1382	2198	2349	813	2880	3512	3684	2296	2043	1529	1331	182	36	64	64	24	82	99	110	70	35	34	37	1	0.899188	2.10567	1.52546	1.22854	2.29866	2.56559	3.7989	2.75441	0.0261049	0.362032	1.2187	0.0394963
tca-mir-11622-3p	685	16503	1382	2198	2349	813	2880	3512	3684	2296	2043	1529	1331	182	68	100	100	37	150	188	207	128	85	73	59	10	1.21387	0.841928	0.437974	0.610959	3.01447	4.42635	6.42355	3.80483	0.335759	1.04384	0.57306	0.864208
tca-mir-11622-5p	1126	16503	1382	2198	2349	813	2880	3512	3684	2296	2043	1529	1331	182	110	185	184	65	250	304	325	206	114	102	78	8	1.42415	3.08354	1.75925	1.10361	5.00765	6.03045	7.34909	5.05762	0.0037442	0.242413	0.0358407	0.0552338
tca-mir-11623-3p	142	16503	1382	2198	2349	813	2880	3512	3684	2296	2043	1529	1331	182	8	9	10	4	34	45	49	27	20	17	17	5	0.0704431	0.00260611	0.00261975	0.0785081	1.73315	2.88312	3.52399	1.46843	0.651444	0.972359	1.43324	2.30761
tca-mir-11623-5p	126	16503	1382	2198	2349	813	2880	3512	3684	2296	2043	1529	1331	182	9	18	17	5	42	46	45	36	12	13	8	1	0.209302	0.499494	0.273814	0.227352	5.34169	4.56791	3.69821	5.30571	0.0984137	0.557281	0.157402	0.391675
tca-mir-3851g-1-3p	301	16503	1382	2198	2349	813	2880	3512	3684	2296	2043	1529	1331	182	50	64	61	32	64	77	86	55	46	29	26	6	6.03138	4.34834	2.82468	4.83465	1.44557	1.52181	2.36901	1.87748	1.26171	0.438488	0.509305	1.30428
tca-mir-3851g-1-5p	306	16503	1382	2198	2349	813	2880	3512	3684	2296	2043	1529	1331	182	32	46	47	22	83	92	93	61	27	20	24	3	1.09874	0.784449	0.595378	1.53129	5.1166	3.98598	3.43296	2.88685	0.013371	0.0241173	0.297796	0.359223
tca-mir-11624a-1-3p	370	16503	1382	2198	2349	813	2880	3512	3684	2296	2043	1529	1331	182	33	61	57	13	89	102	107	70	32	33	31	0	0.509086	1.49263	0.636473	0.0566753	3.34815	2.82388	2.95468	2.56665	0.00603543	0.261952	0.436896	0.00690115
tca-mir-11624a-1-5p	686	16503	1382	2198	2349	813	2880	3512	3684	2296	2043	1529	1331	182	74	111	123	46	151	164	181	107	72	63	47	0	1.99958	1.92456	2.60138	1.85687	3.13014	1.39496	2.34753	1.05247	0.030725	0.304164	0.0604547	0.000183263
tca-mir-11624a-2-3p	370	16503	1382	2198	2349	813	2880	3512	3684	2296	2043	1529	1331	182	33	61	57	13	89	102	107	70	32	33	31	0	0.509086	1.49263	0.636473	0.0566753	3.34815	2.82388	2.95468	2.56665	0.00603543	0.261952	0.436896	0.00690115
tca-mir-11624a-2-5p	686	16503	1382	2198	2349	813	2880	3512	3684	2296	2043	1529	1331	182	74	111	123	46	151	164	181	107	72	63	47	0	1.99958	1.92456	2.60138	1.85687	3.13014	1.39496	2.34753	1.05247	0.030725	0.304164	0.0604547	0.000183263
tca-mir-3806b-1-3p	681	16503	1382	2198	2349	813	2880	3512	3684	2296	2043	1529	1331	182	63	99	99	31	158	201	209	130	85	73	57	4	0.746131	0.808454	0.417328	0.196325	4.4072	7.02683	7.03413	4.28132	0.358272	1.08463	0.456266	0.0577995
tca-mir-3806b-1-5p	213	16503	1382	2198	2349	813	2880	3512	3684	2296	2043	1529	1331	182	16	37	36	12	49	67	73	44	26	11	15	2	0.208457	1.44744	0.947026	0.598122	1.82829	3.75217	4.67462	2.61258	0.319859	0.00837407	0.184403	0.378815
tca-mir-11624a-3-3p	313	16503	1382	2198	2349	813	2880	3512	3684	2296	2043	1529	1331	182	26	56	52	10	71	79	84	56	27	25	28	0	0.332211	2.08639	1.00412	0.0417472	2.16244	1.41753	1.61418	1.7233	0.00957131	0.124827	0.614855	0.0132566
tca-mir-11624a-3-5p	686	16503	1382	2198	2349	813	2880	3512	3684	2296	2043	1529	1331	182	74	111	123	46	151	164	181	107	72	63	47	0	1.99958	1.92456	2.60138	1.85687	3.13014	1.39496	2.34753	1.05247	0.030725	0.304164	0.0604547	0.000183263
tca-mir-309c-3p	246	16503	1382	2198	2349	813	2880	3512	3684	2296	2043	1529	1331	182	40	49	42	18	56	69	76	46	19	23	21	4	4.79861	2.86947	1.06062	1.45009	1.89136	2.34881	3.18411	1.85819	0.00547966	0.3701	0.471319	0.864903
tca-mir-309c-5p	908	16503	1382	2198	2349	813	2880	3512	3684	2296	2043	1529	1331	182	102	156	158	57	179	227	252	139	115	91	77	4	3.06474	3.56835	2.58116	1.59974	1.51389	2.60826	4.48006	1.00855	0.431416	0.717519	0.533904	0.0111512
tca-mir-11624b-1-3p	257	16503	1382	2198	2349	813	2880	3512	3684	2296	2043	1529	1331	182	22	30	26	6	58	75	79	49	26	22	30	2	0.396934	0.12422	0.0135655	0.0121942	1.85575	2.994	3.20332	2.09012	0.0730203	0.220661	1.80379	0.26656
tca-mir-11624b-1-5p	643	16503	1382	2198	2349	813	2880	3512	3684	2296	2043	1529	1331	182	74	105	115	45	138	155	175	102	70	62	44	1	2.69125	1.96619	2.44182	2.14492	2.48863	1.45918	2.90523	1.17568	0.0616481	0.472249	0.0642549	0.00255656
tca-mir-3851h-3p	225	16503	1382	2198	2349	813	2880	3512	3684	2296	2043	1529	1331	182	31	34	28	15	54	73	76	42	24	19	25	0	2.66642	0.735415	0.126664	1.04444	2.32647	4.50028	4.57622	1.74808	0.125739	0.213527	1.39689	0.0367216
tca-mir-3851h-5p	408	16503	1382	2198	2349	813	2880	3512	3684	2296	2043	1529	1331	182	40	58	62	24	111	126	132	85	40	34	36	7	0.895814	0.57477	0.585773	0.812688	6.60337	5.78779	6.06115	4.39314	0.0271038	0.148302	0.602584	1.08181
tca-mir-11624d-3p	288	16503	1382	2198	2349	813	2880	3512	3684	2296	2043	1529	1331	182	25	36	32	9	83	103	109	70	28	24	33	4	0.427759	0.207375	0.0319146	0.0424487	6.26926	8.38635	9.20148	6.16992	0.0435513	0.177286	1.79593	0.67157
tca-mir-11624d-5p	349	16503	1382	2198	2349	813	2880	3512	3684	2296	2043	1529	1331	182	34	45	56	21	71	82	86	55	41	34	38	3	0.819336	0.255763	0.83668	0.849182	1.16941	0.857772	0.877246	0.85588	0.219539	0.474037	1.62676	0.268218
tca-mir-3851i-3p	153	16503	1382	2198	2349	813	2880	3512	3684	2296	2043	1529	1331	182	26	28	23	12	32	38	46	24	14	14	22	1	3.78788	1.51787	0.473478	1.40715	0.961757	0.919172	2.01243	0.654175	0.0629426	0.34772	2.57015	0.296719
tca-mir-3851i-5p	386	16503	1382	2198	2349	813	2880	3512	3684	2296	2043	1529	1331	182	29	51	54	18	92	108	112	72	38	45	31	3	0.158674	0.311999	0.284563	0.271344	3.2914	3.1897	3.11303	2.4566	0.0315309	1.34169	0.335132	0.208294
tca-mir-3851j-3p	368	16503	1382	2198	2349	813	2880	3512	3684	2296	2043	1529	1331	182	66	68	65	32	79	106	118	70	39	31	28	2	9.03577	2.72735	1.57702	3.17032	1.72386	3.648	5.30318	2.62814	0.0789982	0.170822	0.236065	0.110564
tca-mir-3851j-5p	947	16503	1382	2198	2349	813	2880	3512	3684	2296	2043	1529	1331	182	89	150	140	50	229	264	281	179	102	94	77	8	0.957546	2.03247	0.537745	0.566206	7.57803	6.53433	7.62735	5.34246	0.0292795	0.665628	0.357291	0.140468
tca-mir-11625a-3p	1039	16503	1382	2198	2349	813	2880	3512	3684	2296	2043	1529	1331	182	136	199	209	91	247	297	313	198	88	70	67	5	7.39579	7.70389	7.4821	7.62282	7.4321	8.44608	9.20794	6.09189	9.65332e-06	0.000679889	0.0109681	0.0107231
tca-mir-11625a-5p	501	16503	1382	2198	2349	813	2880	3512	3684	2296	2043	1529	1331	182	58	84	76	34	124	144	145	101	49	47	36	4	2.32525	1.98146	0.606052	1.6207	4.95448	4.60728	3.74128	4.43905	0.0173303	0.371455	0.131753	0.186196
tca-mir-11626a-3p	369	16503	1382	2198	2349	813	2880	3512	3684	2296	2043	1529	1331	182	31	60	62	20	92	107	116	71	35	33	35	0	0.351807	1.3746	1.16186	0.555824	4.0171	3.79664	4.78457	2.78885	0.0214072	0.267261	0.871209	0.00698053
tca-mir-11626a-5p	329	16503	1382	2198	2349	813	2880	3512	3684	2296	2043	1529	1331	182	29	46	45	20	71	84	92	56	37	32	27	1	0.469388	0.48864	0.238817	0.86703	1.66609	1.58044	2.19637	1.3452	0.153392	0.466799	0.385666	0.0550298
tca-mir-11626b-3p	336	16503	1382	2198	2349	813	2880	3512	3684	2296	2043	1529	1331	182	33	57	57	21	78	96	103	61	35	33	29	0	0.843165	1.65705	1.17927	0.97098	2.57844	3.25031	3.86866	1.94413	0.0723678	0.496005	0.513965	0.0101836
tca-mir-11626b-5p	407	16503	1382	2198	2349	813	2880	3512	3684	2296	2043	1529	1331	182	39	66	70	26	90	108	115	71	50	49	40	3	0.788439	1.42614	1.41848	1.14323	2.21601	2.3603	2.72635	1.75207	0.313596	1.62243	1.08755	0.180257
tca-mir-3806b-2-3p	681	16503	1382	2198	2349	813	2880	3512	3684	2296	2043	1529	1331	182	63	99	99	31	158	201	209	130	85	73	57	4	0.746131	0.808454	0.417328	0.196325	4.4072	7.02683	7.03413	4.28132	0.358272	1.08463	0.456266	0.0577995
tca-mir-3806b-2-5p	213	16503	1382	2198	2349	813	2880	3512	3684	2296	2043	1529	1331	182	16	37	36	12	49	67	73	44	26	11	15	2	0.208457	1.44744	0.947026	0.598122	1.82829	3.75217	4.67462	2.61258	0.319859	0.00837407	0.184403	0.378815
tca-mir-11624c-3p	314	16503	1382	2198	2349	813	2880	3512	3684	2296	2043	1529	1331	182	36	58	55	15	72	82	89	55	30	26	25	0	1.6642	2.43836	1.37627	0.31746	2.30061	1.79073	2.32028	1.54048	0.0315823	0.162453	0.324096	0.0131053
tca-mir-11624c-5p	774	16503	1382	2198	2349	813	2880	3512	3684	2296	2043	1529	1331	182	79	119	135	48	164	189	209	123	91	84	60	5	1.55137	1.40155	2.33961	1.37075	2.58299	1.85786	3.13743	1.31737	0.166317	1.26192	0.224437	0.0651215
tca-mir-11627-3p	616	16503	1382	2198	2349	813	2880	3512	3684	2296	2043	1529	1331	182	47	81	80	25	139	176	175	108	74	62	63	8	0.140526	0.283364	0.0971254	0.0860744	3.40547	5.27892	3.88268	2.37101	0.235565	0.659868	1.67051	0.618737
tca-mir-11627-5p	138	16503	1382	2198	2349	813	2880	3512	3684	2296	2043	1529	1331	182	13	18	18	7	33	41	46	30	12	17	10	3	0.576091	0.32254	0.222072	0.431427	1.69608	2.1416	2.99027	2.37636	0.0524479	1.06166	0.250484	1.17671
tca-mir-11628-3p	394	16503	1382	2198	2349	813	2880	3512	3684	2296	2043	1529	1331	182	34	49	60	22	97	108	122	72	43	34	30	3	0.417617	0.175687	0.591115	0.641363	3.96712	2.85272	4.64543	2.2326	0.101695	0.200559	0.232665	0.197153
tca-mir-11628-5p	4794	16503	1382	2198	2349	813	2880	3512	3684	2296	2043	1529	1331	182	578	858	894	346	935	1173	1234	755	594	465	404	52	15	15	15	15	5.32861	9.99753	10.9881	5.1555	0.320876	0.983573	0.883901	0.284231
tca-mir-11629-3p	2332	16503	1382	2198	2349	813	2880	3512	3684	2296	2043	1529	1331	182	232	362	397	129	462	594	648	374	292	226	183	18	2.78925	3.40443	4.70518	1.17191	3.20552	7.16314	11.0418	3.13793	0.402464	0.678339	0.191209	0.0252006
tca-mir-11629-5p	1427	16503	1382	2198	2349	813	2880	3512	3684	2296	2043	1529	1331	182	141	220	230	79	339	409	448	279	155	117	104	9	1.81208	2.1364	1.79497	0.918718	10.006	11.6812	15	9.55992	0.0159147	0.0354136	0.0656075	0.0183981
tca-mir-11630-3p	1404	16503	1382	2198	2349	813	2880	3512	3684	2296	2043	1529	1331	182	134	226	249	89	283	347	363	219	172	123	123	10	1.33673	3.12051	4.24845	2.25423	2.57368	3.2706	3.32671	1.56902	0.267051	0.133967	0.833623	0.0389657
tca-mir-11630-5p	862	16503	1382	2198	2349	813	2880	3512	3684	2296	2043	1529	1331	182	89	136	141	48	204	243	251	165	92	83	80	6	1.78421	1.84852	1.50034	0.784556	6.10289	6.48403	6.147	5.30447	0.0284784	0.486551	1.08968	0.0735976
tca-mir-3851n-2-3p	236	16503	1382	2198	2349	813	2880	3512	3684	2296	2043	1529	1331	182	47	51	50	30	49	61	68	42	31	26	16	4	8.21744	3.8348	2.88767	6.21249	1.1084	1.4223	2.11871	1.43146	0.497822	0.83086	0.141395	0.91932
tca-mir-3851n-2-5p	534	16503	1382	2198	2349	813	2880	3512	3684	2296	2043	1529	1331	182	54	81	80	31	124	150	164	100	71	51	52	8	1.19864	1.03957	0.548768	0.835722	3.64216	4.21112	5.71224	3.17335	0.63203	0.428595	1.17446	0.863679
tca-mir-3851l-3-3p	264	16503	1382	2198	2349	813	2880	3512	3684	2296	2043	1529	1331	182	49	53	52	31	60	71	80	51	31	29	22	4	7.46669	3.1175	2.2637	5.61752	1.95916	1.93331	3.02757	2.25938	0.236929	0.850622	0.419393	0.775608
tca-mir-3851l-3-5p	469	16503	1382	2198	2349	813	2880	3512	3684	2296	2043	1529	1331	182	49	72	74	28	100	120	132	81	62	49	43	6	1.34243	1.06919	0.824613	0.909467	1.91679	1.99893	2.94494	1.79886	0.584077	0.785431	0.785016	0.583584
tca-mir-3851k-3-3p	239	16503	1382	2198	2349	813	2880	3512	3684	2296	2043	1529	1331	182	45	50	48	29	52	63	70	45	32	27	17	4	7.13825	3.41934	2.31549	5.61684	1.45793	1.61464	2.34274	1.88539	0.557777	0.934073	0.184045	0.902608
tca-mir-3851k-3-5p	492	16503	1382	2198	2349	813	2880	3512	3684	2296	2043	1529	1331	182	46	75	80	28	110	134	143	86	58	42	43	5	0.723138	1.03894	1.06077	0.739983	2.71074	3.22861	3.79208	1.9983	0.203798	0.166692	0.591339	0.337398
tca-mir-11618b-3-3p	562	16503	1382	2198	2349	813	2880	3512	3684	2296	2043	1529	1331	182	65	96	103	41	117	144	159	95	74	59	49	5	2.50552	2.39843	2.59185	2.32091	1.80925	2.28378	3.50577	1.74983	0.589166	0.865321	0.599301	0.229293
tca-mir-11618b-3-5p	458	16503	1382	2198	2349	813	2880	3512	3684	2296	2043	1529	1331	182	39	64	70	26	108	140	158	96	52	32	44	4	0.383119	0.510851	0.631771	0.716868	3.53486	6.05242	9.25397	4.96311	0.140588	0.0214306	1.01522	0.242623
tca-mir-11618a-3-3p	185	16503	1382	2198	2349	813	2880	3512	3684	2296	2043	1529	1331	182	20	24	24	9	47	57	61	40	22	16	22	2	1.02484	0.29956	0.191817	0.368571	2.63671	3.07585	3.52855	2.83459	0.279835	0.258349	1.60401	0.475847
tca-mir-11618a-3-5p	456	16503	1382	2198	2349	813	2880	3512	3684	2296	2043	1529	1331	182	39	65	70	23	114	140	157	95	46	33	45	3	0.395055	0.602416	0.65445	0.399362	4.83004	6.17146	9.13042	4.80821	0.032832	0.0326293	1.17083	0.128136
tca-mir-3806b-3-3p	681	16503	1382	2198	2349	813	2880	3512	3684	2296	2043	1529	1331	182	63	99	99	31	158	201	209	130	85	73	57	4	0.746131	0.808454	0.417328	0.196325	4.4072	7.02683	7.03413	4.28132	0.358272	1.08463	0.456266	0.0577995
tca-mir-3806b-3-5p	213	16503	1382	2198	2349	813	2880	3512	3684	2296	2043	1529	1331	182	16	37	36	12	49	67	73	44	26	11	15	2	0.208457	1.44744	0.947026	0.598122	1.82829	3.75217	4.67462	2.61258	0.319859	0.00837407	0.184403	0.378815
tca-mir-3851m-3-3p	256	16503	1382	2198	2349	813	2880	3512	3684	2296	2043	1529	1331	182	47	54	53	31	55	68	78	46	36	26	19	5	7.05451	3.71751	2.77204	5.90961	1.40871	1.76083	3.04828	1.56915	0.750044	0.573761	0.226832	1.18992
tca-mir-3851m-3-5p	557	16503	1382	2198	2349	813	2880	3512	3684	2296	2043	1529	1331	182	57	87	88	33	125	155	174	100	72	53	52	9	1.31122	1.31891	0.891232	0.936595	3.04291	4.10191	6.54335	2.56185	0.498891	0.417332	0.932968	1.04908
tca-mir-11617a-3-3p	180	16503	1382	2198	2349	813	2880	3512	3684	2296	2043	1529	1331	182	20	26	25	12	42	49	55	35	16	17	15	0	1.12026	0.548892	0.30077	0.966259	1.7716	1.64555	2.41804	1.83171	0.0409538	0.394637	0.420097	0.0626725
tca-mir-11617a-3-5p	364	16503	1382	2198	2349	813	2880	3512	3684	2296	2043	1529	1331	182	36	64	64	24	82	99	110	70	35	34	37	1	0.899188	2.10567	1.52546	1.22854	2.29866	2.56559	3.7989	2.75441	0.0261049	0.362032	1.2187	0.0394963
tca-mir-11619a-1-3p	352	16503	1382	2198	2349	813	2880	3512	3684	2296	2043	1529	1331	182	32	45	44	16	89	105	121	70	46	28	20	1	0.564372	0.23674	0.0941977	0.244684	4.14735	4.27203	7.20468	3.16065	0.507406	0.110899	0.0241554	0.0442614
tca-mir-11619a-1-5p	522	16503	1382	2198	2349	813	2880	3512	3684	2296	2043	1529	1331	182	51	86	74	27	126	134	152	104	65	48	52	5	0.968731	1.82325	0.314986	0.458825	4.47254	2.20236	4.02343	4.32791	0.350092	0.315302	1.31753	0.28633
tca-mir-3851m-2-3p	256	16503	1382	2198	2349	813	2880	3512	3684	2296	2043	1529	1331	182	47	54	53	31	55	68	78	46	36	26	19	5	7.05451	3.71751	2.77204	5.90961	1.40871	1.76083	3.04828	1.56915	0.750044	0.573761	0.226832	1.18992
tca-mir-3851m-2-5p	557	16503	1382	2198	2349	813	2880	3512	3684	2296	2043	1529	1331	182	57	87	88	33	125	155	174	100	72	53	52	9	1.31122	1.31891	0.891232	0.936595	3.04291	4.10191	6.54335	2.56185	0.498891	0.417332	0.932968	1.04908
tca-mir-11618a-5-3p	185	16503	1382	2198	2349	813	2880	3512	3684	2296	2043	1529	1331	182	20	24	24	9	47	57	61	40	22	16	22	2	1.02484	0.29956	0.191817	0.368571	2.63671	3.07585	3.52855	2.83459	0.279835	0.258349	1.60401	0.475847
tca-mir-11618a-5-5p	456	16503	1382	2198	2349	813	2880	3512	3684	2296	2043	1529	1331	182	39	65	70	23	114	140	157	95	46	33	45	3	0.395055	0.602416	0.65445	0.399362	4.83004	6.17146	9.13042	4.80821	0.032832	0.0326293	1.17083	0.128136
tca-mir-11618b-4-3p	506	16503	1382	2198	2349	813	2880	3512	3684	2296	2043	1529	1331	182	60	86	98	35	109	132	149	88	67	50	41	4	2.61528	2.16536	3.29877	1.75993	2.16252	2.43452	4.2184	1.97176	0.602436	0.549848	0.350712	0.180495
tca-mir-11618b-4-5p	458	16503	1382	2198	2349	813	2880	3512	3684	2296	2043	1529	1331	182	39	64	70	26	108	140	158	96	52	32	44	4	0.383119	0.510851	0.631771	0.716868	3.53486	6.05242	9.25397	4.96311	0.140588	0.0214306	1.01522	0.242623
tca-mir-3851k-4-3p	239	16503	1382	2198	2349	813	2880	3512	3684	2296	2043	1529	1331	182	45	50	48	29	52	63	70	45	32	27	17	4	7.13825	3.41934	2.31549	5.61684	1.45793	1.61464	2.34274	1.88539	0.557777	0.934073	0.184045	0.902608
tca-mir-3851k-4-5p	492	16503	1382	2198	2349	813	2880	3512	3684	2296	2043	1529	1331	182	46	75	80	28	110	134	143	86	58	42	43	5	0.723138	1.03894	1.06077	0.739983	2.71074	3.22861	3.79208	1.9983	0.203798	0.166692	0.591339	0.337398
tca-mir-11619a-2-3p	352	16503	1382	2198	2349	813	2880	3512	3684	2296	2043	1529	1331	182	32	45	44	16	89	105	121	70	46	28	20	1	0.564372	0.23674	0.0941977	0.244684	4.14735	4.27203	7.20468	3.16065	0.507406	0.110899	0.0241554	0.0442614
tca-mir-11619a-2-5p	522	16503	1382	2198	2349	813	2880	3512	3684	2296	2043	1529	1331	182	51	86	74	27	126	134	152	104	65	48	52	5	0.968731	1.82325	0.314986	0.458825	4.47254	2.20236	4.02343	4.32791	0.350092	0.315302	1.31753	0.28633
tca-mir-11617a-4-3p	180	16503	1382	2198	2349	813	2880	3512	3684	2296	2043	1529	1331	182	20	26	25	12	42	49	55	35	16	17	15	0	1.12026	0.548892	0.30077	0.966259	1.7716	1.64555	2.41804	1.83171	0.0409538	0.394637	0.420097	0.0626725
tca-mir-11617a-4-5p	364	16503	1382	2198	2349	813	2880	3512	3684	2296	2043	1529	1331	182	36	64	64	24	82	99	110	70	35	34	37	1	0.899188	2.10567	1.52546	1.22854	2.29866	2.56559	3.7989	2.75441	0.0261049	0.362032	1.2187	0.0394963
tca-mir-11618a-2-3p	190	16503	1382	2198	2349	813	2880	3512	3684	2296	2043	1529	1331	182	19	27	31	14	48	58	70	39	22	19	18	3	0.767293	0.506253	0.756868	1.31169	2.62109	3.00457	5.7738	2.35956	0.237102	0.51213	0.711508	0.799896
tca-mir-11618a-2-5p	456	16503	1382	2198	2349	813	2880	3512	3684	2296	2043	1529	1331	182	39	65	70	23	114	140	157	95	46	33	45	3	0.395055	0.602416	0.65445	0.399362	4.83004	6.17146	9.13042	4.80821	0.032832	0.0326293	1.17083	0.128136
tca-mir-3806b-4-3p	681	16503	1382	2198	2349	813	2880	3512	3684	2296	2043	1529	1331	182	63	99	99	31	158	201	209	130	85	73	57	4	0.746131	0.808454	0.417328	0.196325	4.4072	7.02683	7.03413	4.28132	0.358272	1.08463	0.456266	0.0577995
tca-mir-3806b-4-5p	213	16503	1382	2198	2349	813	2880	3512	3684	2296	2043	1529	1331	182	16	37	36	12	49	67	73	44	26	11	15	2	0.208457	1.44744	0.947026	0.598122	1.82829	3.75217	4.67462	2.61258	0.319859	0.00837407	0.184403	0.378815
tca-mir-971b-3p	568	16503	1382	2198	2349	813	2880	3512	3684	2296	2043	1529	1331	182	64	99	96	41	125	151	152	103	61	61	55	7	2.2203	2.72561	1.52222	2.24189	2.71361	3.04231	2.31695	2.75949	0.0582007	1.01057	1.17166	0.536689
tca-mir-971b-5p	536	16503	1382	2198	2349	813	2880	3512	3684	2296	2043	1529	1331	182	61	82	85	30	132	154	164	102	59	52	46	3	2.24307	1.11043	0.904963	0.698072	5.10305	4.86052	5.60468	3.47676	0.0867189	0.484226	0.532067	0.0723046
tca-mir-11619c-3p	796	16503	1382	2198	2349	813	2880	3512	3684	2296	2043	1529	1331	182	73	127	122	38	185	232	248	144	78	81	62	4	0.735484	1.91399	0.771806	0.268629	5.0807	7.48818	8.88018	3.51693	0.0051367	0.781388	0.23404	0.0257395
tca-mir-11619c-5p	583	16503	1382	2198	2349	813	2880	3512	3684	2296	2043	1529	1331	182	59	86	76	35	134	169	186	108	60	58	56	4	1.25847	0.864768	0.107079	1.01703	3.66657	5.50656	7.67695	3.18956	0.0291418	0.595643	1.13142	0.110764
tca-mir-11619d-3p	727	16503	1382	2198	2349	813	2880	3512	3684	2296	2043	1529	1331	182	72	114	113	41	147	186	199	114	79	77	54	4	1.23266	1.58191	0.857827	0.797886	1.67622	2.71504	3.34325	1.1345	0.0515808	1.02647	0.146555	0.0420756
tca-mir-11619d-5p	384	16503	1382	2198	2349	813	2880	3512	3684	2296	2043	1529	1331	182	37	62	63	19	94	113	121	82	45	37	32	5	0.797593	1.34597	1.01119	0.365025	3.77519	4.2536	5.00694	4.67031	0.20843	0.445571	0.423538	0.601462
tca-mir-3851q-3p	251	16503	1382	2198	2349	813	2880	3512	3684	2296	2043	1529	1331	182	28	41	41	16	59	70	77	47	28	20	23	1	1.32123	1.16335	0.832832	0.939244	2.25842	2.30646	3.11495	1.89328	0.164966	0.14209	0.658822	0.114934
tca-mir-3851q-5p	1421	16503	1382	2198	2349	813	2880	3512	3684	2296	2043	1529	1331	182	144	232	228	80	320	384	426	260	138	128	117	13	2.20325	3.5454	1.70481	1.0406	6.87451	7.53633	12.0723	6.2438	0.000260146	0.211184	0.420265	0.148964
tca-mir-11625b-3p	1141	16503	1382	2198	2349	813	2880	3512	3684	2296	2043	1529	1331	182	142	218	222	93	270	325	341	217	108	87	75	6	6.35382	8.29528	6.70059	6.31682	7.87362	9.00802	9.53891	6.55054	0.000360182	0.0108794	0.0126841	0.0123692
tca-mir-11625b-5p	691	16503	1382	2198	2349	813	2880	3512	3684	2296	2043	1529	1331	182	85	112	103	49	161	192	196	134	70	67	56	4	3.91534	1.95733	0.551552	2.38002	4.58001	4.85234	4.21502	4.72964	0.0156329	0.5005	0.347632	0.0539812
tca-mir-3851g-2-3p	201	16503	1382	2198	2349	813	2880	3512	3684	2296	2043	1529	1331	182	15	36	33	7	41	45	51	33	23	16	11	0	0.206421	1.60844	0.795831	0.108324	0.934299	0.503273	0.886082	0.888409	0.216254	0.161283	0.0484022	0.048746
tca-mir-3851g-2-5p	306	16503	1382	2198	2349	813	2880	3512	3684	2296	2043	1529	1331	182	32	46	47	22	83	92	93	61	27	20	24	3	1.09874	0.784449	0.595378	1.53129	5.1166	3.98598	3.43296	2.88685	0.013371	0.0241173	0.297796	0.359223
tca-mir-11631-3p	147	16503	1382	2198	2349	813	2880	3512	3684	2296	2043	1529	1331	182	9	17	20	4	32	37	37	25	18	16	14	1	0.0988334	0.163696	0.276578	0.0676424	1.15005	0.975339	0.757077	0.937692	0.339666	0.69568	0.685992	0.315279
tca-mir-11631-5p	208	16503	1382	2198	2349	813	2880	3512	3684	2296	2043	1529	1331	182	22	30	31	12	54	67	70	41	25	20	17	2	0.985715	0.556944	0.461753	0.644384	3.14161	4.09872	4.23071	2.118	0.291828	0.428618	0.383836	0.394428
tca-mir-3851d-1-3p	157	16503	1382	2198	2349	813	2880	3512	3684	2296	2043	1529	1331	182	25	30	21	12	29	44	49	23	16	13	22	1	3.22721	1.82136	0.246588	1.33179	0.492007	1.7636	2.44258	0.466018	0.120317	0.221465	2.4262	0.285033
tca-mir-3851d-1-5p	279	16503	1382	2198	2349	813	2880	3512	3684	2296	2043	1529	1331	182	27	37	41	18	77	93	89	60	25	18	24	2	0.739945	0.330186	0.429583	1.01619	5.1098	6.04784	4.12777	3.74336	0.0196886	0.025805	0.494498	0.223943
tca-mir-3858a-2-3p	396	16503	1382	2198	2349	813	2880	3512	3684	2296	2043	1529	1331	182	41	66	69	23	85	108	116	73	48	33	28	3	1.17757	1.65297	1.51521	0.762636	1.80156	2.77261	3.36711	2.34845	0.279951	0.150781	0.133819	0.194459
tca-mir-3858a-2-5p	426	16503	1382	2198	2349	813	2880	3512	3684	2296	2043	1529	1331	182	43	76	73	31	86	112	121	68	47	31	24	3	1.06736	2.52829	1.42082	1.92583	1.22159	2.28491	2.91864	1.01349	0.107667	0.0387558	0.0145871	0.158026
tca-mir-3851d-2-3p	157	16503	1382	2198	2349	813	2880	3512	3684	2296	2043	1529	1331	182	25	30	21	12	29	44	49	23	16	13	22	1	3.22721	1.82136	0.246588	1.33179	0.492007	1.7636	2.44258	0.466018	0.120317	0.221465	2.4262	0.285033
tca-mir-3851d-2-5p	393	16503	1382	2198	2349	813	2880	3512	3684	2296	2043	1529	1331	182	40	57	60	15	100	121	125	75	40	31	28	3	1.07576	0.663316	0.602728	0.0875004	4.67343	5.52075	5.36731	2.79977	0.0462052	0.0942408	0.142629	0.198514
tca-mir-11617b-3p	593	16503	1382	2198	2349	813	2880	3512	3684	2296	2043	1529	1331	182	65	93	101	29	119	155	148	97	75	72	50	5	1.98332	1.40605	1.65116	0.330498	1.39071	2.77052	1.26686	1.42973	0.408791	2.1426	0.475393	0.192463
tca-mir-11617b-5p	602	16503	1382	2198	2349	813	2880	3512	3684	2296	2043	1529	1331	182	54	93	94	35	149	184	197	121	58	54	60	6	0.574954	1.26736	0.830606	0.87864	5.78748	7.68643	9.0785	5.0904	0.00840861	0.247527	1.42669	0.3031
tca-mir-3858b-3p	426	16503	1382	2198	2349	813	2880	3512	3684	2296	2043	1529	1331	182	45	63	64	22	92	116	129	79	49	38	33	3	1.35101	0.785085	0.53792	0.449692	1.96366	2.89485	4.35571	2.5507	0.167272	0.254373	0.257945	0.158026
tca-mir-3858b-5p	329	16503	1382	2198	2349	813	2880	3512	3684	2296	2043	1529	1331	182	26	43	45	15	64	79	88	54	41	47	27	6	0.241425	0.289754	0.238817	0.253444	0.825469	1.00119	1.62367	1.08351	0.356325	2.97579	0.385666	1.13954
tca-mir-11632-3p	1557	16503	1382	2198	2349	813	2880	3512	3684	2296	2043	1529	1331	182	151	258	268	101	381	458	479	309	168	131	128	11	1.64153	4.32136	3.62387	2.7882	13.1657	15	15	11.377	0.0103394	0.0554483	0.416184	0.0305068
tca-mir-11632-5p	864	16503	1382	2198	2349	813	2880	3512	3684	2296	2043	1529	1331	182	87	139	143	56	191	248	263	161	95	80	55	6	1.51565	2.15582	1.66464	1.82822	3.87534	7.32112	8.29377	4.52827	0.0510046	0.325575	0.013812	0.0727373
tca-mir-11633-3p	61	16503	1382	2198	2349	813	2880	3512	3684	2296	2043	1529	1331	182	7	8	6	3	18	17	20	15	8	5	2	1	0.868556	0.370723	0.105727	0.451155	2.19763	1.08653	1.68799	2.1045	0.46784	0.298945	0.0557657	0.83703
tca-mir-11633-5p	244	16503	1382	2198	2349	813	2880	3512	3684	2296	2043	1529	1331	182	22	31	32	10	66	76	85	55	31	25	21	4	0.513265	0.246807	0.18503	0.179258	4.21826	3.97889	5.60993	4.0699	0.407339	0.594549	0.48981	0.875496
tca-mir-3836g-1-3p	195	16503	1382	2198	2349	813	2880	3512	3684	2296	2043	1529	1331	182	39	36	31	17	41	56	63	37	23	17	17	3	7.06297	1.79982	0.66322	2.10487	1.0929	2.27836	3.34184	1.73037	0.263472	0.265178	0.509209	0.771858
tca-mir-3836g-1-5p	256	16503	1382	2198	2349	813	2880	3512	3684	2296	2043	1529	1331	182	12	27	33	6	70	76	75	50	35	28	23	3	0.00682831	0.0497763	0.157051	0.0125677	4.58526	3.2612	2.4582	2.32709	0.638569	0.824953	0.603866	0.504897
tca-mir-3836g-2-3p	195	16503	1382	2198	2349	813	2880	3512	3684	2296	2043	1529	1331	182	39	36	31	17	41	56	63	37	23	17	17	3	7.06297	1.79982	0.66322	2.10487	1.0929	2.27836	3.34184	1.73037	0.263472	0.265178	0.509209	0.771858
tca-mir-3836g-2-5p	256	16503	1382	2198	2349	813	2880	3512	3684	2296	2043	1529	1331	182	12	27	33	6	70	76	75	50	35	28	23	3	0.00682831	0.0497763	0.157051	0.0125677	4.58526	3.2612	2.4582	2.32709	0.638569	0.824953	0.603866	0.504897
tca-mir-3851m-4-3p	258	16503	1382	2198	2349	813	2880	3512	3684	2296	2043	1529	1331	182	47	53	51	31	56	67	77	46	33	25	16	3	6.94726	3.36668	2.26682	5.83519	1.50002	1.53849	2.74078	1.51575	0.425835	0.449108	0.0758117	0.498033
tca-mir-3851m-4-5p	557	16503	1382	2198	2349	813	2880	3512	3684	2296	2043	1529	1331	182	57	87	88	33	125	155	174	100	72	53	52	9	1.31122	1.31891	0.891232	0.936595	3.04291	4.10191	6.54335	2.56185	0.498891	0.417332	0.932968	1.04908
tca-mir-3851r-3p	236	16503	1382	2198	2349	813	2880	3512	3684	2296	2043	1529	1331	182	47	51	50	30	49	61	68	42	31	26	16	4	8.21744	3.8348	2.88767	6.21249	1.1084	1.4223	2.11871	1.43146	0.497822	0.83086	0.141395	0.91932
tca-mir-3851r-5p	573	16503	1382	2198	2349	813	2880	3512	3684	2296	2043	1529	1331	182	63	86	90	35	129	163	181	104	70	48	49	6	1.97111	0.988448	0.857767	1.09632	3.17326	4.83251	7.14855	2.79219	0.287027	0.127129	0.52472	0.350689
tca-mir-3836c-4-3p	209	16503	1382	2198	2349	813	2880	3512	3684	2296	2043	1529	1331	182	39	38	32	16	42	58	64	37	26	18	19	4	6.22672	1.75579	0.543192	1.52927	0.868897	1.99409	2.70721	1.31129	0.359228	0.244091	0.613422	1.08645
tca-mir-3836c-4-5p	278	16503	1382	2198	2349	813	2880	3512	3684	2296	2043	1529	1331	182	18	40	40	12	63	78	75	52	38	31	30	5	0.0692016	0.57854	0.368133	0.209852	1.99273	2.55785	1.56184	2.00667	0.650503	0.930673	1.3867	1.05631
tca-mir-11634-3p	72	16503	1382	2198	2349	813	2880	3512	3684	2296	2043	1529	1331	182	7	14	13	5	15	21	25	14	9	4	3	0	0.595739	1.30055	0.863602	0.844071	0.747604	1.38276	2.27155	1.16454	0.397799	0.0921289	0.0743135	0.259044
tca-mir-11634-5p	201	16503	1382	2198	2349	813	2880	3512	3684	2296	2043	1529	1331	182	14	20	22	8	53	66	68	40	15	18	18	1	0.144339	0.0417201	0.0479414	0.178548	3.2727	4.3388	4.21677	2.15723	0.00738953	0.301951	0.572161	0.185153
tca-mir-3851l-1-3p	264	16503	1382	2198	2349	813	2880	3512	3684	2296	2043	1529	1331	182	49	53	52	31	60	71	80	51	31	29	22	4	7.46669	3.1175	2.2637	5.61752	1.95916	1.93331	3.02757	2.25938	0.236929	0.850622	0.419393	0.775608
tca-mir-3851l-1-5p	469	16503	1382	2198	2349	813	2880	3512	3684	2296	2043	1529	1331	182	51	76	77	32	107	132	136	85	59	38	45	6	1.64778	1.53785	1.11373	1.59554	2.96629	3.84258	3.59763	2.40013	0.384472	0.104536	1.0185	0.583584
tca-mir-3836c-5-3p	209	16503	1382	2198	2349	813	2880	3512	3684	2296	2043	1529	1331	182	39	38	32	16	42	58	64	37	26	18	19	4	6.22672	1.75579	0.543192	1.52927	0.868897	1.99409	2.70721	1.31129	0.359228	0.244091	0.613422	1.08645
tca-mir-3836c-5-5p	278	16503	1382	2198	2349	813	2880	3512	3684	2296	2043	1529	1331	182	18	40	40	12	63	78	75	52	38	31	30	5	0.0692016	0.57854	0.368133	0.209852	1.99273	2.55785	1.56184	2.00667	0.650503	0.930673	1.3867	1.05631
tca-mir-11635-3p	533	16503	1382	2198	2349	813	2880	3512	3684	2296	2043	1529	1331	182	60	94	86	34	109	138	149	84	61	52	51	7	2.1184	2.78519	1.03733	1.29032	1.52581	2.38634	3.08975	1.01936	0.141382	0.504929	1.06082	0.62704
tca-mir-11636-3p	720	16503	1382	2198	2349	813	2880	3512	3684	2296	2043	1529	1331	182	74	111	117	42	161	193	210	129	84	65	69	10	1.55225	1.37538	1.27839	0.958998	3.62486	3.89287	5.31386	3.05718	0.154444	0.254325	1.23912	0.763076
tca-mir-11636-5p	159	16503	1382	2198	2349	813	2880	3512	3684	2296	2043	1529	1331	182	17	31	28	11	42	49	50	34	19	11	7	0	0.932412	1.98127	1.03019	1.02784	2.79057	2.76647	2.5511	2.45549	0.296056	0.0910326	0.0228338	0.0809374
tca-mir-3806c-3p	640	16503	1382	2198	2349	813	2880	3512	3684	2296	2043	1529	1331	182	59	91	89	29	147	184	194	121	82	68	53	4	0.713012	0.643995	0.24548	0.194577	3.93266	5.67099	6.17019	3.85512	0.468406	0.991235	0.416232	0.0761954
tca-mir-11637-5p	3131	16503	1382	2198	2349	813	2880	3512	3684	2296	2043	1529	1331	182	342	496	527	196	675	820	896	560	363	309	261	31	7.9269	5.59502	5.61506	4.08897	10.725	12.9683	15	11.8197	0.0326181	1.03354	0.59313	0.146782
tca-mir-11638-3p	142	16503	1382	2198	2349	813	2880	3512	3684	2296	2043	1529	1331	182	21	14	16	10	25	37	38	23	10	9	20	1	2.44924	0.0630322	0.0897276	1.0367	0.369046	1.15709	1.06275	0.74604	0.0125532	0.0665606	2.31148	0.331765
tca-mir-3836h-3p	195	16503	1382	2198	2349	813	2880	3512	3684	2296	2043	1529	1331	182	37	34	29	15	39	54	61	35	23	17	17	3	6.1509	1.40603	0.453646	1.49784	0.824518	1.88886	2.86619	1.35083	0.263472	0.265178	0.509209	0.771858
tca-mir-11639-3p	115	16503	1382	2198	2349	813	2880	3512	3684	2296	2043	1529	1331	182	10	14	15	4	24	30	34	18	13	15	8	1	0.433584	0.239279	0.236462	0.170838	0.859812	1.06208	1.57549	0.612648	0.244557	1.1877	0.231056	0.440404
tca-mir-11617d-1-5p	364	16503	1382	2198	2349	813	2880	3512	3684	2296	2043	1529	1331	182	37	53	50	20	93	111	114	69	45	38	30	3	1.03378	0.668135	0.242412	0.588774	4.48062	4.92933	4.63678	2.56293	0.333257	0.721956	0.395309	0.242144
tca-bantam-3p	532	16503	1382	2198	2349	813	2880	3512	3684	2296	2043	1529	1331	182	66	90	79	35	99	135	158	77	61	48	38	1	3.31812	2.1776	0.504341	1.47299	0.660939	2.03689	4.63955	0.488814	0.144705	0.267461	0.119809	0.00776823
tca-bantam-5p	1150	16503	1382	2198	2349	813	2880	3512	3684	2296	2043	1529	1331	182	107	174	161	63	283	342	366	240	137	110	90	11	0.960774	1.53781	0.242206	0.779058	10.0975	11.9992	14.3525	11.1037	0.173068	0.47532	0.225641	0.206672
tca-let-7-3p	673	16503	1382	2198	2349	813	2880	3512	3684	2296	2043	1529	1331	182	79	113	115	51	155	193	203	124	73	63	55	4	3.06968	2.44382	1.83031	3.0596	4.16734	5.83015	6.25155	3.45155	0.0551561	0.364856	0.37375	0.0610312
tca-let-7-5p	387	16503	1382	2198	2349	813	2880	3512	3684	2296	2043	1529	1331	182	34	60	68	21	90	114	123	75	51	38	39	3	0.466974	1.04733	1.57377	0.562563	2.88033	4.30462	5.27785	2.99143	0.548025	0.504257	1.20407	0.206869
tca-mir-1-3p	842	16503	1382	2198	2349	813	2880	3512	3684	2296	2043	1529	1331	182	97	141	154	62	177	228	235	145	87	89	65	7	3.31352	2.82908	3.47292	3.22394	2.57876	4.77979	4.39591	2.62659	0.0149482	1.08377	0.209577	0.144815
tca-mir-1-5p	175	16503	1382	2198	2349	813	2880	3512	3684	2296	2043	1529	1331	182	15	27	21	10	45	51	57	34	26	18	17	3	0.403707	0.761487	0.11504	0.610329	2.67134	2.28147	3.20468	1.79575	0.875084	0.573295	0.767332	0.891362
tca-mir-10-3p	1086	16503	1382	2198	2349	813	2880	3512	3684	2296	2043	1529	1331	182	99	169	188	56	231	275	300	187	128	109	83	7	0.780336	1.92203	2.83861	0.486497	3.46363	3.38316	5.03033	3.19088	0.147501	0.775245	0.169176	0.0371817
tca-mir-10-5p	304	16503	1382	2198	2349	813	2880	3512	3684	2296	2043	1529	1331	182	27	51	52	17	69	79	94	53	38	26	28	2	0.486072	1.47503	1.18078	0.61424	2.12868	1.70012	3.75233	1.47495	0.365171	0.20669	0.707232	0.18378
tca-mir-100-3p	797	16503	1382	2198	2349	813	2880	3512	3684	2296	2043	1529	1331	182	58	107	121	39	210	245	264	174	105	74	55	2	0.0651113	0.358401	0.698393	0.323234	10.3528	10.2634	12.5949	9.76375	0.649859	0.336207	0.0552346	0.00271894
tca-mir-100-5p	86	16503	1382	2198	2349	813	2880	3512	3684	2296	2043	1529	1331	182	8	11	13	2	19	29	26	17	7	9	7	1	0.534027	0.319961	0.472175	0.0955023	0.986663	2.60649	1.48827	1.32398	0.0703379	0.564516	0.407596	0.610641
tca-mir-1000-3p	226	16503	1382	2198	2349	813	2880	3512	3684	2296	2043	1529	1331	182	23	44	35	12	46	61	66	36	31	20	12	3	0.868308	2.46385	0.589611	0.491047	0.966383	1.79452	2.22118	0.786664	0.632334	0.277164	0.033184	0.620836
tca-mir-1000-5p	734	16503	1382	2198	2349	813	2880	3512	3684	2296	2043	1529	1331	182	64	106	107	38	183	213	227	149	87	80	59	8	0.475673	0.781263	0.434194	0.47589	7.16933	6.77602	7.88425	6.35139	0.189738	1.26407	0.322121	0.37572
tca-mir-11-3p	964	16503	1382	2198	2349	813	2880	3512	3684	2296	2043	1529	1331	182	151	209	216	88	194	244	253	147	95	82	89	4	14.2142	13.2033	12.1647	8.24135	1.92861	3.0642	2.87505	0.996809	0.00301372	0.107484	1.1074	0.00721195
tca-mir-11-5p	174	16503	1382	2198	2349	813	2880	3512	3684	2296	2043	1529	1331	182	18	24	27	10	39	53	53	33	16	11	11	0	0.851892	0.427267	0.568464	0.620455	1.43589	2.79522	2.32804	1.61949	0.0550947	0.0497396	0.12216	0.0673887
tca-mir-1175-3p	288	16503	1382	2198	2349	813	2880	3512	3684	2296	2043	1529	1331	182	36	52	48	20	74	85	94	58	27	20	16	3	2.2264	2.06768	0.988542	1.3232	3.82671	3.45528	4.74532	2.89437	0.0299575	0.0452667	0.0294278	0.405933
tca-mir-1175-5p	345	16503	1382	2198	2349	813	2880	3512	3684	2296	2043	1529	1331	182	26	39	42	15	84	93	108	67	37	36	25	1	0.171816	0.0707864	0.0713035	0.197438	3.38278	2.33658	4.42936	2.78164	0.0947922	0.709159	0.173161	0.0472977
tca-mir-12-3p	138	16503	1382	2198	2349	813	2880	3512	3684	2296	2043	1529	1331	182	20	23	23	14	37	43	34	30	13	15	12	0	2.27143	0.992715	0.76545	2.47967	2.68417	2.63301	0.654092	2.37636	0.0846127	0.683018	0.493566	0.10517
tca-mir-12-5p	839	16503	1382	2198	2349	813	2880	3512	3684	2296	2043	1529	1331	182	100	150	153	65	190	239	241	152	84	81	76	7	3.93469	4.29978	3.39548	3.96255	4.47869	6.78445	5.44523	3.70281	0.00729453	0.496967	0.89925	0.147071
tca-mir-124-3p	453	16503	1382	2198	2349	813	2880	3512	3684	2296	2043	1529	1331	182	55	75	77	32	82	116	123	69	57	46	37	8	2.68617	1.72225	1.39329	1.78914	0.482885	1.96612	2.21981	0.731839	0.384881	0.646888	0.372442	1.1936
tca-mir-124-5p	409	16503	1382	2198	2349	813	2880	3512	3684	2296	2043	1529	1331	182	41	75	69	22	101	106	119	81	45	45	34	3	1.01086	2.83176	1.25551	0.544686	4.15089	2.00919	3.30823	3.46819	0.107736	1.01379	0.418144	0.177784
tca-mir-125-3p	257	16503	1382	2198	2349	813	2880	3512	3684	2296	2043	1529	1331	182	24	32	38	13	44	60	67	37	32	24	25	3	0.612124	0.209076	0.445982	0.410721	0.28721	0.73201	1.18624	0.43357	0.357513	0.366888	0.865658	0.501453
tca-mir-125-5p	107	16503	1382	2198	2349	813	2880	3512	3684	2296	2043	1529	1331	182	12	16	18	10	28	31	33	23	9	10	6	0	0.954533	0.595286	0.744122	1.78816	2.08132	1.65116	1.82325	1.95593	0.0617514	0.392086	0.113752	0.157447
tca-mir-133-3p	126	16503	1382	2198	2349	813	2880	3512	3684	2296	2043	1529	1331	182	13	18	14	9	32	42	39	27	12	11	10	0	0.772246	0.499494	0.0922756	1.03271	2.05333	3.24848	2.04247	2.13423	0.0984137	0.296919	0.35845	0.122599
tca-mir-133-5p	256	16503	1382	2198	2349	813	2880	3512	3684	2296	2043	1529	1331	182	20	33	38	16	58	78	73	46	26	26	23	4	0.241945	0.271391	0.457843	0.88439	1.89026	3.71311	2.10249	1.56915	0.0758557	0.573761	0.603866	0.813998
tca-mir-137-3p	902	16503	1382	2198	2349	813	2880	3512	3684	2296	2043	1529	1331	182	108	155	148	63	195	237	261	154	105	77	65	9	4.27256	3.55405	1.5853	2.69099	3.39688	4.00963	6.11922	2.59423	0.132557	0.118533	0.0870595	0.268017
tca-mir-137-5p	603	16503	1382	2198	2349	813	2880	3512	3684	2296	2043	1529	1331	182	62	85	70	26	152	166	172	121	72	67	63	3	1.40632	0.584129	0.0140704	0.139662	6.39231	4.07133	3.9273	5.05467	0.220829	1.29303	1.85019	0.0440332
tca-mir-13a-3p	1066	16503	1382	2198	2349	813	2880	3512	3684	2296	2043	1529	1331	182	172	227	238	100	204	266	275	153	110	100	95	7	15	13.4257	13.1889	9.95355	1.2012	2.89492	2.6117	0.502032	0.0078013	0.376774	0.871019	0.0418962
tca-mir-13a-5p	468	16503	1382	2198	2349	813	2880	3512	3684	2296	2043	1529	1331	182	53	79	71	30	120	142	143	101	41	44	43	4	2.00443	1.97497	0.596476	1.23647	5.61074	5.92469	4.95994	5.76501	0.00330755	0.377735	0.794405	0.228231
tca-mir-13b-3p	1105	16503	1382	2198	2349	813	2880	3512	3684	2296	2043	1529	1331	182	178	237	248	101	212	272	284	158	108	102	103	7	15	14.3748	14.0101	9.41119	1.26273	2.59312	2.5798	0.479841	0.00131235	0.310042	1.28153	0.0331503
tca-mir-13b-5p	916	16503	1382	2198	2349	813	2880	3512	3684	2296	2043	1529	1331	182	86	134	136	47	207	242	258	159	105	96	79	8	0.936002	0.972439	0.5629	0.45853	4.75536	4.24486	5.07159	2.96418	0.101595	1.05532	0.621822	0.163385
tca-mir-14-3p	687	16503	1382	2198	2349	813	2880	3512	3684	2296	2043	1529	1331	182	80	130	128	48	168	196	213	139	68	65	57	3	2.99656	5.00538	3.33347	2.2258	6.06934	5.74397	7.53999	5.8938	0.00997041	0.40253	0.424828	0.0230995
tca-mir-14-5p	100	16503	1382	2198	2349	813	2880	3512	3684	2296	2043	1529	1331	182	6	11	12	3	22	29	30	19	13	10	6	1	0.129339	0.157905	0.166655	0.135283	1.02658	1.59786	1.55906	1.23866	0.450904	0.493519	0.151359	0.519541
tca-mir-184-3p	234	16503	1382	2198	2349	813	2880	3512	3684	2296	2043	1529	1331	182	24	31	30	15	46	76	71	36	28	26	19	1	0.907841	0.33249	0.157393	0.93449	0.788722	4.66474	2.79528	0.650612	0.277692	0.86093	0.369484	0.13504
tca-mir-184-5p	315	16503	1382	2198	2349	813	2880	3512	3684	2296	2043	1529	1331	182	27	55	58	19	73	96	99	62	28	27	28	4	0.399108	1.85409	1.81356	0.830105	2.44295	4.37155	4.20702	2.77904	0.0136037	0.207109	0.595686	0.571707
tca-mir-190-3p	217	16503	1382	2198	2349	813	2880	3512	3684	2296	2043	1529	1331	182	22	38	34	12	51	63	65	44	30	20	15	1	0.843436	1.51686	0.626377	0.563215	2.05444	2.58674	2.47881	2.45098	0.653709	0.346173	0.165588	0.158793
tca-mir-190-5p	1271	16503	1382	2198	2349	813	2880	3512	3684	2296	2043	1529	1331	182	118	193	186	64	329	379	412	271	132	111	92	4	0.987075	1.69863	0.4977	0.405127	15	13.4646	15	13.6646	0.00545748	0.134658	0.0660543	0.00054818
tca-mir-193-3p	175	16503	1382	2198	2349	813	2880	3512	3684	2296	2043	1529	1331	182	19	31	26	13	39	54	60	33	15	20	20	1	1.01922	1.42473	0.448111	1.29409	1.40057	2.97613	4.01511	1.58589	0.0326756	0.879571	1.36509	0.238428
tca-mir-210-3p	271	16503	1382	2198	2349	813	2880	3512	3684	2296	2043	1529	1331	182	31	48	44	17	74	91	90	64	42	24	19	3	1.52003	1.81656	0.825009	0.912382	4.77143	6.09572	4.91243	5.27556	1.28779	0.26746	0.158523	0.455726
tca-mir-210-5p	178	16503	1382	2198	2349	813	2880	3512	3684	2296	2043	1529	1331	182	13	22	21	7	36	54	61	34	20	18	11	4	0.195937	0.224831	0.100301	0.183728	0.85153	2.78792	4.05977	1.6899	0.202126	0.534323	0.107217	1.3238
tca-mir-219-3p	227	16503	1382	2198	2349	813	2880	3512	3684	2296	2043	1529	1331	182	17	28	31	11	68	79	83	59	18	15	22	1	0.199756	0.203769	0.25729	0.353402	5.9698	6.11313	6.49423	6.38924	0.00923454	0.0443376	0.818743	0.14434
tca-mir-219-5p	459	16503	1382	2198	2349	813	2880	3512	3684	2296	2043	1529	1331	182	42	64	75	27	119	143	152	95	48	49	41	5	0.619555	0.50159	1.06498	0.844422	5.82792	6.70042	7.57237	4.68891	0.052656	0.891112	0.66697	0.403304
tca-mir-252a-3p	208	16503	1382	2198	2349	813	2880	3512	3684	2296	2043	1529	1331	182	18	33	26	9	47	62	70	40	26	17	11	2	0.419518	0.926011	0.138065	0.238562	1.64817	2.86242	4.23071	1.90524	0.369652	0.183589	0.0374061	0.394428
tca-mir-252a-5p	890	16503	1382	2198	2349	813	2880	3512	3684	2296	2043	1529	1331	182	127	176	175	77	190	230	252	156	94	85	67	5	9.23438	7.90262	5.71021	6.33814	3.04603	3.4557	5.15059	3.10704	0.0214779	0.45074	0.153603	0.0305542
tca-mir-252b-3p	141	16503	1382	2198	2349	813	2880	3512	3684	2296	2043	1529	1331	182	14	20	17	6	42	46	48	34	8	12	6	0	0.695903	0.487499	0.138388	0.262464	4.00533	3.23367	3.31566	3.42897	0.00282881	0.259596	0.0251659	0.101261
tca-mir-252b-5p	573	16503	1382	2198	2349	813	2880	3512	3684	2296	2043	1529	1331	182	69	95	94	38	130	161	167	104	55	39	50	6	3.07108	2.01601	1.22338	1.58851	3.33394	4.46859	4.36512	2.79219	0.00900368	0.00872259	0.605415	0.350689
tca-mir-263a-3p	200	16503	1382	2198	2349	813	2880	3512	3684	2296	2043	1529	1331	182	16	24	27	9	47	59	64	42	25	26	17	3	0.291161	0.17694	0.244854	0.278276	1.9517	2.64766	3.25486	2.67288	0.370266	1.52228	0.457495	0.744935
tca-mir-263a-5p	531	16503	1382	2198	2349	813	2880	3512	3684	2296	2043	1529	1331	182	53	91	89	31	123	163	188	108	53	40	26	3	1.10815	2.35117	1.37917	0.857124	3.57293	7.03916	11.9903	4.86275	0.0211904	0.0410404	0.00110807	0.0749831
tca-mir-263b-3p	564	16503	1382	2198	2349	813	2880	3512	3684	2296	2043	1529	1331	182	49	95	84	27	133	156	161	102	56	44	46	4	0.448221	2.20552	0.524481	0.291242	4.16851	3.98164	3.74313	2.70149	0.0171049	0.0577421	0.367661	0.125165
tca-mir-263b-5p	656	16503	1382	2198	2349	813	2880	3512	3684	2296	2043	1529	1331	182	69	111	96	42	153	194	218	131	72	64	45	6	1.68447	2.52253	0.447738	1.46334	4.41428	6.87624	10.6633	5.29445	0.0683235	0.522698	0.0646429	0.229737
tca-mir-275-3p	366	16503	1382	2198	2349	813	2880	3512	3684	2296	2043	1529	1331	182	36	48	54	23	95	114	122	77	41	38	23	2	0.875698	0.294098	0.452856	1.02466	4.85283	5.51727	6.42641	4.20938	0.139382	0.700583	0.0550251	0.112344
tca-mir-275-5p	381	16503	1382	2198	2349	813	2880	3512	3684	2296	2043	1529	1331	182	33	50	60	25	88	106	118	71	41	35	29	5	0.426898	0.294333	0.755709	1.23205	2.74003	3.05215	4.52595	2.4226	0.0900355	0.321962	0.234342	0.611092
tca-mir-276-3p	320	16503	1382	2198	2349	813	2880	3512	3684	2296	2043	1529	1331	182	36	44	48	18	83	106	113	63	21	25	27	2	1.55219	0.430908	0.506307	0.634593	4.34034	6.60531	7.50308	2.81362	0.000185028	0.103567	0.451172	0.161927
tca-mir-276-5p	115	16503	1382	2198	2349	813	2880	3512	3684	2296	2043	1529	1331	182	12	15	15	5	19	22	25	13	13	15	13	2	0.783037	0.331055	0.236462	0.298958	0.26328	0.175457	0.294834	0.128013	0.244557	1.1877	1.10236	0.872484
tca-mir-2765-3p	149	16503	1382	2198	2349	813	2880	3512	3684	2296	2043	1529	1331	182	17	22	21	13	40	48	49	29	16	12	13	1	1.13575	0.594134	0.335667	1.81303	2.84278	3.19476	2.97971	1.65118	0.168802	0.199389	0.501383	0.308949
tca-mir-2765-5p	252	16503	1382	2198	2349	813	2880	3512	3684	2296	2043	1529	1331	182	29	44	39	17	58	75	82	48	23	24	17	3	1.49763	1.62547	0.600416	1.13378	2.0332	3.26456	4.20349	2.05502	0.0290473	0.408866	0.131365	0.518925
tca-mir-277-3p	1271	16503	1382	2198	2349	813	2880	3512	3684	2296	2043	1529	1331	182	160	208	212	87	241	313	340	182	128	115	105	10	7.42472	3.29532	2.32298	3.17394	1.1804	2.90368	4.3303	0.503282	0.00194599	0.232371	0.431888	0.0770559
tca-mir-2788-3p	178	16503	1382	2198	2349	813	2880	3512	3684	2296	2043	1529	1331	182	19	27	26	8	36	43	62	31	20	20	16	1	0.963967	0.70367	0.406877	0.28676	0.85153	0.822317	4.35015	1.12666	0.202126	0.826965	0.571323	0.23151
tca-mir-2788-5p	403	16503	1382	2198	2349	813	2880	3512	3684	2296	2043	1529	1331	182	40	48	53	25	120	129	135	103	45	34	28	4	0.953011	0.109762	0.150288	1.0111	9.59395	6.85724	7.15718	9.93687	0.12724	0.165521	0.114988	0.338369
tca-mir-2796-3p	115	16503	1382	2198	2349	813	2880	3512	3684	2296	2043	1529	1331	182	13	17	20	11	24	26	32	19	9	15	17	1	1.00096	0.573758	0.868677	1.95402	0.859812	0.500898	1.18435	0.767517	0.0378513	1.1877	2.31582	0.440404
tca-mir-2796-5p	228	16503	1382	2198	2349	813	2880	3512	3684	2296	2043	1529	1331	182	17	22	22	9	66	69	72	58	31	25	16	1	0.194639	0.0254028	0.01077	0.160131	5.25666	3.29284	3.36292	5.96347	0.603387	0.80451	0.174911	0.142972
tca-mir-279a-3p	499	16503	1382	2198	2349	813	2880	3512	3684	2296	2043	1529	1331	182	91	124	118	57	96	108	133	74	60	53	42	4	12.5351	12.2027	8.36817	9.00211	0.885097	0.403109	2.0534	0.602328	0.249066	0.891833	0.460443	0.188523
tca-mir-279a-5p	361	16503	1382	2198	2349	813	2880	3512	3684	2296	2043	1529	1331	182	24	46	49	19	96	115	123	82	37	43	32	3	0.0624453	0.228383	0.216999	0.486684	5.3691	6.0943	7.06223	5.75141	0.0560324	1.44045	0.603006	0.247153
tca-mir-279b-3p	475	16503	1382	2198	2349	813	2880	3512	3684	2296	2043	1529	1331	182	91	124	115	58	91	101	125	71	60	53	39	4	13.8577	13.8682	8.80946	10.2943	0.836191	0.32141	1.79468	0.636448	0.39888	1.17524	0.38619	0.218637
tca-mir-279b-5p	355	16503	1382	2198	2349	813	2880	3512	3684	2296	2043	1529	1331	182	35	54	54	21	84	96	108	72	40	40	27	2	0.876663	0.892321	0.572792	0.797361	2.97463	2.43134	3.87022	3.48576	0.149864	1.08297	0.237838	0.122645
tca-mir-279c-3p	502	16503	1382	2198	2349	813	2880	3512	3684	2296	2043	1529	1331	182	89	117	115	54	94	111	137	76	69	57	37	4	11.5634	9.6558	7.36102	7.65511	0.690289	0.522851	2.47669	0.719943	0.807653	1.33602	0.164571	0.185043
tca-mir-279c-5p	314	16503	1382	2198	2349	813	2880	3512	3684	2296	2043	1529	1331	182	21	41	40	12	79	92	99	62	31	32	28	5	0.0767118	0.289386	0.125053	0.108762	3.70437	3.54923	4.26708	2.8141	0.0450037	0.607274	0.605211	0.871386
tca-mir-279d-3p	477	16503	1382	2198	2349	813	2880	3512	3684	2296	2043	1529	1331	182	90	116	111	53	93	104	132	72	61	53	35	3	13.3033	10.8169	7.52033	8.01408	0.975441	0.43917	2.64569	0.691261	0.444462	1.14936	0.162455	0.110479
tca-mir-279d-5p	444	16503	1382	2198	2349	813	2880	3512	3684	2296	2043	1529	1331	182	35	50	46	17	99	123	130	76	34	51	37	4	0.216969	0.0501202	0.00381663	0.0786291	2.47706	3.3346	3.66702	1.64543	0.000345542	1.33541	0.426502	0.26421
tca-mir-279e-3p	488	16503	1382	2198	2349	813	2880	3512	3684	2296	2043	1529	1331	182	84	112	112	52	91	108	132	72	65	52	40	5	10.2752	8.86493	7.23722	7.27005	0.657674	0.52531	2.26961	0.572999	0.626417	0.902305	0.381669	0.344812
tca-mir-279e-5p	635	16503	1382	2198	2349	813	2880	3512	3684	2296	2043	1529	1331	182	54	88	80	27	158	180	192	122	68	69	60	6	0.380584	0.499872	0.0580938	0.121333	6.23799	5.15224	6.03278	4.1909	0.04841	1.14994	1.06464	0.256113
tca-mir-281-3p	368	16503	1382	2198	2349	813	2880	3512	3684	2296	2043	1529	1331	182	33	69	71	24	77	102	108	67	41	30	22	0	0.525268	2.92711	2.56223	1.18476	1.45733	2.90788	3.22221	2.09201	0.131759	0.131402	0.0352711	0.00706081
tca-mir-281-5p	228	16503	1382	2198	2349	813	2880	3512	3684	2296	2043	1529	1331	182	30	29	27	12	46	54	60	40	31	28	25	5	2.30418	0.252961	0.0823418	0.476139	0.919384	0.783308	1.19247	1.31053	0.603387	1.3045	1.33793	1.38824
tca-mir-282-3p	115	16503	1382	2198	2349	813	2880	3512	3684	2296	2043	1529	1331	182	13	12	18	4	32	38	39	26	11	7	7	0	1.00096	0.109532	0.557555	0.170838	2.72036	2.94391	2.82612	2.41478	0.109339	0.0722237	0.143446	0.141527
tca-mir-282-5p	168	16503	1382	2198	2349	813	2880	3512	3684	2296	2043	1529	1331	182	23	27	24	10	36	44	49	31	16	14	12	3	2.16485	0.911194	0.358437	0.684427	1.13003	1.28812	1.83147	1.41558	0.073303	0.222382	0.21931	0.938233
tca-mir-283-3p	1474	16503	1382	2198	2349	813	2880	3512	3684	2296	2043	1529	1331	182	157	251	256	95	325	406	421	265	158	127	125	10	3.24479	5.06715	3.73575	2.5743	6.05231	9.05764	8.75374	5.70992	0.0096663	0.0955492	0.599519	0.0265825
tca-mir-283-5p	1486	16503	1382	2198	2349	813	2880	3512	3684	2296	2043	1529	1331	182	217	302	308	133	297	363	388	232	147	134	127	7	15	15	12.5065	11.6569	2.45555	3.01061	3.8825	1.64459	0.000440308	0.212182	0.655656	0.00252567
tca-mir-29-3p	401	16503	1382	2198	2349	813	2880	3512	3684	2296	2043	1529	1331	182	52	63	66	27	84	99	99	62	45	39	38	3	3.22532	1.16017	1.05363	1.39389	1.54199	1.37709	0.94461	0.787218	0.134341	0.4758	0.893846	0.187876
tca-mir-29-5p	1240	16503	1382	2198	2349	813	2880	3512	3684	2296	2043	1529	1331	182	112	177	191	60	279	337	351	229	158	130	102	14	0.750933	0.848038	0.985885	0.279836	6.02222	6.93403	6.91889	5.8652	0.488856	1.23813	0.410118	0.405051
tca-mir-2944a-3p	1198	16503	1382	2198	2349	813	2880	3512	3684	2296	2043	1529	1331	182	195	252	262	108	244	301	312	189	127	117	105	9	15	14.2303	13.3771	9.68091	2.53168	3.3998	3.15867	1.59658	0.0120024	0.604942	0.785743	0.0660828
tca-mir-2944a-5p	485	16503	1382	2198	2349	813	2880	3512	3684	2296	2043	1529	1331	182	50	72	78	26	124	161	168	101	48	50	48	3	1.27196	0.84698	0.969619	0.549269	5.70009	9.63053	9.9415	5.04964	0.0222748	0.728377	1.22513	0.104376
tca-mir-2944b-3p	967	16503	1382	2198	2349	813	2880	3512	3684	2296	2043	1529	1331	182	160	214	220	89	193	243	252	146	108	86	81	6	15	14.4922	13.1003	8.50294	1.78275	2.87228	2.6894	0.897832	0.0599402	0.198186	0.48123	0.0389195
tca-mir-2944b-5p	581	16503	1382	2198	2349	813	2880	3512	3684	2296	2043	1529	1331	182	51	75	86	22	125	170	181	103	64	61	41	6	0.486202	0.231167	0.496004	0.0522292	2.35747	5.8062	6.68267	2.44215	0.0813281	0.877072	0.0994388	0.336926
tca-mir-2944c-3p	1164	16503	1382	2198	2349	813	2880	3512	3684	2296	2043	1529	1331	182	180	248	254	96	227	281	294	169	119	109	96	8	15	14.6758	12.8591	6.73994	1.57385	2.1821	2.2084	0.598998	0.00448891	0.370139	0.419941	0.0446735
tca-mir-2944c-5p	610	16503	1382	2198	2349	813	2880	3512	3684	2296	2043	1529	1331	182	60	92	106	31	139	181	195	116	67	52	49	7	1.08175	1.05762	1.93723	0.418121	3.5991	6.57639	8.08434	3.8333	0.0744593	0.147499	0.324288	0.444092
tca-mir-2a-3p	1055	16503	1382	2198	2349	813	2880	3512	3684	2296	2043	1529	1331	182	168	224	241	97	205	263	270	156	111	102	95	5	15	13.1114	14.5396	9.19439	1.42236	2.84444	2.38094	0.732481	0.0134539	0.526314	0.946853	0.00953547
tca-mir-2a-5p	123	16503	1382	2198	2349	813	2880	3512	3684	2296	2043	1529	1331	182	15	19	16	10	31	34	34	27	12	14	16	2	1.29056	0.698604	0.227873	1.39462	1.96403	1.4432	1.18185	2.28391	0.114298	0.782244	1.70057	0.810646
tca-mir-2b-3p	1055	16503	1382	2198	2349	813	2880	3512	3684	2296	2043	1529	1331	182	168	224	241	97	205	263	270	156	111	102	95	5	15	13.1114	14.5396	9.19439	1.42236	2.84444	2.38094	0.732481	0.0134539	0.526314	0.946853	0.00953547
tca-mir-2b-5p	437	16503	1382	2198	2349	813	2880	3512	3684	2296	2043	1529	1331	182	34	58	66	19	88	120	141	77	64	57	40	9	0.196859	0.321913	0.565277	0.176609	1.21423	3.1149	6.3376	1.94313	1.18371	2.48151	0.759916	1.63217
tca-mir-2c-3p	282	16503	1382	2198	2349	813	2880	3512	3684	2296	2043	1529	1331	182	40	52	49	18	52	72	74	36	26	23	15	1	3.44777	2.25137	1.24504	0.982947	0.526801	1.44834	1.3014	0.169594	0.0261188	0.154825	0.0218347	0.0857569
tca-mir-2c-5p	585	16503	1382	2198	2349	813	2880	3512	3684	2296	2043	1529	1331	182	66	91	96	40	142	172	175	116	64	63	47	7	2.27965	1.31434	1.23981	1.83169	5.072	6.01002	5.25758	4.63704	0.0733999	1.04272	0.325716	0.497275
tca-mir-3049-3p	139	16503	1382	2198	2349	813	2880	3512	3684	2296	2043	1529	1331	182	14	20	17	9	37	44	43	34	17	15	6	0	0.728998	0.520941	0.152253	0.829227	2.6238	2.82734	2.1664	3.55533	0.339876	0.666119	0.0276594	0.103849
tca-mir-3049-5p	231	16503	1382	2198	2349	813	2880	3512	3684	2296	2043	1529	1331	182	20	35	34	10	55	64	69	48	22	20	17	2	0.420475	0.75216	0.429647	0.229351	2.27818	2.1061	2.54892	2.83056	0.0492566	0.243986	0.224485	0.327848
tca-mir-305-3p	254	16503	1382	2198	2349	813	2880	3512	3684	2296	2043	1529	1331	182	28	37	41	19	65	69	84	54	36	34	18	2	1.26649	0.613351	0.779474	1.57741	3.4152	2.00181	4.57055	3.32845	0.781639	1.94733	0.174905	0.272982
tca-mir-305-5p	878	16503	1382	2198	2349	813	2880	3512	3684	2296	2043	1529	1331	182	100	146	157	56	179	223	259	148	97	85	74	7	3.22112	2.78014	3.07325	1.7026	2.04192	2.94007	6.83935	2.30899	0.0546568	0.514526	0.501833	0.120021
tca-mir-307-3p	337	16503	1382	2198	2349	813	2880	3512	3684	2296	2043	1529	1331	182	52	60	57	33	62	85	89	46	43	38	34	6	5.24378	2.13582	1.15962	4.21629	0.53362	1.46979	1.50172	0.286403	0.424733	1.06256	1.13527	1.09665
tca-mir-307-5p	290	16503	1382	2198	2349	813	2880	3512	3684	2296	2043	1529	1331	182	29	34	44	16	63	78	82	53	38	25	20	4	0.87468	0.118683	0.540958	0.578431	1.61049	2.05359	2.16749	1.83699	0.50302	0.22151	0.137129	0.66359
tca-mir-308-3p	893	16503	1382	2198	2349	813	2880	3512	3684	2296	2043	1529	1331	182	149	202	206	86	182	222	243	140	96	77	78	5	15	14.7241	12.9184	9.19663	2.05991	2.44227	3.75379	1.26177	0.0311047	0.136739	0.688215	0.0299417
tca-mir-308-5p	257	16503	1382	2198	2349	813	2880	3512	3684	2296	2043	1529	1331	182	27	32	39	13	64	75	81	49	25	36	21	2	1.04171	0.209076	0.530871	0.410721	3.03858	2.994	3.64444	2.09012	0.0513856	2.3317	0.37946	0.26656
tca-mir-309a-3p	213	16503	1382	2198	2349	813	2880	3512	3684	2296	2043	1529	1331	182	37	40	35	16	46	59	66	40	20	22	18	6	5.18735	2.03975	0.814651	1.46162	1.31787	1.99781	2.91199	1.73998	0.0489713	0.602745	0.446682	2.02404
tca-mir-309a-5p	334	16503	1382	2198	2349	813	2880	3512	3684	2296	2043	1529	1331	182	27	46	47	14	82	96	110	68	46	34	19	0	0.278353	0.43756	0.305102	0.166791	3.44297	3.34679	5.60382	3.3876	0.716455	0.611362	0.0270485	0.0104196
tca-mir-309b-3p	232	16503	1382	2198	2349	813	2880	3512	3684	2296	2043	1529	1331	182	38	41	36	16	47	59	65	39	22	24	20	5	4.68291	1.64158	0.599861	1.17528	0.949247	1.27334	1.78077	1.06288	0.0471599	0.617032	0.491569	1.35771
tca-mir-309b-5p	410	16503	1382	2198	2349	813	2880	3512	3684	2296	2043	1529	1331	182	43	62	59	27	96	121	122	82	41	28	29	2	1.27787	0.90759	0.36763	1.29366	3.12267	4.55681	3.8065	3.64389	0.0347991	0.0206827	0.131197	0.078894
tca-mir-31-5p	383	16503	1382	2198	2349	813	2880	3512	3684	2296	2043	1529	1331	182	41	62	62	26	78	97	102	57	50	38	29	5	1.36457	1.36545	0.921364	1.40439	1.23417	1.63092	1.72345	0.583176	0.510068	0.537898	0.225604	0.604655
tca-mir-315-3p	414	16503	1382	2198	2349	813	2880	3512	3684	2296	2043	1529	1331	182	44	63	70	26	91	107	120	73	46	29	33	4	1.37211	0.951745	1.28215	1.07498	2.15884	1.98539	3.25989	1.88567	0.118651	0.0269067	0.31671	0.316731
tca-mir-315-5p	1878	16503	1382	2198	2349	813	2880	3512	3684	2296	2043	1529	1331	182	176	305	285	103	436	507	531	338	221	178	148	21	1.33732	4.32217	0.992939	0.966708	11.2764	9.82775	10.2573	7.24211	0.100951	0.4573	0.220611	0.381519
tca-mir-316-3p	294	16503	1382	2198	2349	813	2880	3512	3684	2296	2043	1529	1331	182	24	32	31	12	75	85	97	56	24	34	19	2	0.302085	0.0569097	0.0163087	0.157891	3.76042	3.14316	5.08688	2.27022	0.00582195	1.13117	0.0875097	0.198899
tca-mir-316-5p	656	16503	1382	2198	2349	813	2880	3512	3684	2296	2043	1529	1331	182	60	106	110	37	156	186	207	133	81	55	48	2	0.678249	1.85141	1.56265	0.771552	4.96282	5.30553	8.02005	5.72253	0.31836	0.117267	0.132586	0.00981852
tca-mir-317-3p	917	16503	1382	2198	2349	813	2880	3512	3684	2296	2043	1529	1331	182	101	149	161	69	195	239	271	156	104	82	63	6	2.76082	2.42508	2.78166	3.7773	3.02134	3.80288	7.20395	2.55602	0.0842679	0.215791	0.04282	0.0529823
tca-mir-317-5p	70	16503	1382	2198	2349	813	2880	3512	3684	2296	2043	1529	1331	182	8	7	11	6	15	19	23	11	5	7	1	0	0.889301	0.135972	0.538793	1.25009	0.823529	1.03645	1.83439	0.580729	0.0557593	0.493418	0.00862081	0.267097
tca-mir-33-3p	268	16503	1382	2198	2349	813	2880	3512	3684	2296	2043	1529	1331	182	24	37	39	14	66	73	79	47	19	30	23	3	0.501235	0.438234	0.399753	0.464911	2.97083	2.10486	2.62718	1.42182	0.00143742	0.934795	0.486911	0.465146
tca-mir-33-5p	497	16503	1382	2198	2349	813	2880	3512	3684	2296	2043	1529	1331	182	39	72	83	33	126	154	154	101	67	51	45	5	0.201273	0.703952	1.29646	1.47568	5.57618	6.98154	5.65922	4.58626	0.692783	0.711571	0.741529	0.328338
tca-mir-34-3p	187	16503	1382	2198	2349	813	2880	3512	3684	2296	2043	1529	1331	182	11	22	26	8	54	62	56	40	24	13	13	1	0.0616271	0.159898	0.30103	0.238978	4.44567	4.27296	2.24191	2.74151	0.429315	0.0788746	0.184399	0.212033
tca-mir-34-5p	447	16503	1382	2198	2349	813	2880	3512	3684	2296	2043	1529	1331	182	40	61	52	20	114	139	155	94	55	43	35	3	0.534431	0.414511	0.0271465	0.206789	5.25558	6.48505	9.27816	4.93762	0.315496	0.445987	0.276175	0.136489
tca-mir-3477-3p	280	16503	1382	2198	2349	813	2880	3512	3684	2296	2043	1529	1331	182	31	48	43	17	70	78	91	54	27	21	21	1	1.3521	1.57634	0.583665	0.821079	3.29578	2.4681	4.54273	2.33074	0.0418407	0.0855341	0.233914	0.0873905
tca-mir-3477-5p	631	16503	1382	2198	2349	813	2880	3512	3684	2296	2043	1529	1331	182	81	121	127	57	134	170	181	107	59	52	43	4	4.40048	4.99182	4.84125	5.46533	2.27073	3.63344	4.23828	1.92522	0.00394931	0.0987647	0.0625675	0.0808935
tca-mir-375-3p	476	16503	1382	2198	2349	813	2880	3512	3684	2296	2043	1529	1331	182	42	70	72	23	120	144	147	99	65	43	40	4	0.491402	0.782065	0.58369	0.315619	5.22496	5.91521	5.35182	4.94247	0.754584	0.275485	0.453401	0.217297
tca-mir-375-5p	324	16503	1382	2198	2349	813	2880	3512	3684	2296	2043	1529	1331	182	43	55	59	25	69	87	97	60	30	30	21	2	3.01615	1.62805	1.73836	1.99523	1.52101	2.18552	3.29328	2.10525	0.0208019	0.343953	0.0811178	0.156878
tca-mir-3791-3p	97	16503	1382	2198	2349	813	2880	3512	3684	2296	2043	1529	1331	182	8	12	11	4	30	34	37	25	14	12	7	0	0.371291	0.271162	0.128962	0.280804	3.4475	3.24843	3.87928	3.22947	0.66601	0.951045	0.277876	0.180448
tca-mir-3791-5p	457	16503	1382	2198	2349	813	2880	3512	3684	2296	2043	1529	1331	182	46	73	67	29	112	127	140	89	57	46	42	7	1.08488	1.38167	0.438272	1.17205	4.36045	3.47782	4.93693	3.47257	0.356181	0.611655	0.789286	0.874618
tca-mir-3803-3p	183	16503	1382	2198	2349	813	2880	3512	3684	2296	2043	1529	1331	182	15	21	24	8	49	57	60	42	20	20	21	3	0.330954	0.136747	0.207268	0.259267	3.2556	3.20544	3.4118	3.50191	0.168188	0.745075	1.41443	0.841146
tca-mir-3804a-5p	705	16503	1382	2198	2349	813	2880	3512	3684	2296	2043	1529	1331	182	56	102	108	34	161	204	225	132	91	74	63	3	0.199288	0.783374	0.73538	0.29533	4.0997	6.42292	9.13951	3.93973	0.512562	0.947811	0.761205	0.0200479
tca-mir-3804b-3p	762	16503	1382	2198	2349	813	2880	3512	3684	2296	2043	1529	1331	182	84	126	133	52	162	202	223	128	86	77	59	6	2.42394	2.40854	2.32567	2.15082	2.62144	3.74713	5.71147	2.03803	0.0913016	0.7266	0.222685	0.130136
tca-mir-3804b-5p	388	16503	1382	2198	2349	813	2880	3512	3684	2296	2043	1529	1331	182	41	59	56	19	81	99	106	65	40	40	30	2	1.29014	0.922133	0.377298	0.346665	1.47826	1.73607	2.09218	1.3334	0.0547029	0.68279	0.259905	0.0941977
tca-mir-3805a-3p	355	16503	1382	2198	2349	813	2880	3512	3684	2296	2043	1529	1331	182	42	63	62	26	91	108	117	73	30	32	26	3	2.04374	2.17357	1.44567	1.76898	4.46142	4.77064	5.91966	3.71188	0.00495407	0.28464	0.183996	0.257476
tca-mir-3805a-5p	146	16503	1382	2198	2349	813	2880	3512	3684	2296	2043	1529	1331	182	24	25	22	11	30	37	40	23	14	9	12	0	3.34732	1.13524	0.47768	1.24479	0.864806	1.00978	1.22231	0.660762	0.0887678	0.0558266	0.401199	0.0951015
tca-mir-3805b-3p	491	16503	1382	2198	2349	813	2880	3512	3684	2296	2043	1529	1331	182	49	66	72	27	125	156	157	107	50	39	37	1	1.06807	0.361683	0.442332	0.625503	5.63746	7.85941	6.67895	6.27041	0.0331828	0.0821368	0.200169	0.011623
tca-mir-3806a-3p	369	16503	1382	2198	2349	813	2880	3512	3684	2296	2043	1529	1331	182	36	59	63	22	98	117	113	78	38	28	38	4	0.841354	1.24282	1.28558	0.833004	5.4355	6.06877	4.14111	4.32615	0.0575098	0.0707057	1.30438	0.414626
tca-mir-3806a-5p	328	16503	1382	2198	2349	813	2880	3512	3684	2296	2043	1529	1331	182	33	47	45	21	93	99	108	74	40	31	25	3	0.942105	0.582013	0.245539	1.05284	6.54895	4.29629	5.5136	5.16902	0.301962	0.39135	0.246461	0.309386
tca-mir-3807-3p	177	16503	1382	2198	2349	813	2880	3512	3684	2296	2043	1529	1331	182	21	23	25	11	41	51	54	35	14	22	27	4	1.39948	0.304599	0.333874	0.784496	1.69561	2.17501	2.37305	1.94254	0.0171329	1.21496	3.35989	1.33245
tca-mir-3808-3p	1611	16503	1382	2198	2349	813	2880	3512	3684	2296	2043	1529	1331	182	203	262	250	110	396	496	514	323	164	152	137	12	9.37653	3.81961	1.24412	3.81138	14.0151	15	15	12.4886	0.00097683	0.418785	0.635598	0.0399833
tca-mir-3808-5p	332	16503	1382	2198	2349	813	2880	3512	3684	2296	2043	1529	1331	182	35	37	45	17	92	106	119	73	33	26	33	4	1.18305	0.0632075	0.219516	0.429569	6.00537	5.74035	8.28159	4.70145	0.0446867	0.102388	1.05205	0.51673
tca-mir-3809-5p	437	16503	1382	2198	2349	813	2880	3512	3684	2296	2043	1529	1331	182	52	75	78	31	83	121	122	65	53	41	29	3	2.40022	2.0797	1.86186	1.77969	0.751842	3.28403	2.64387	0.598316	0.277217	0.371993	0.0719651	0.146373
tca-mir-3810-3p	337	16503	1382	2198	2349	813	2880	3512	3684	2296	2043	1529	1331	182	35	50	54	16	74	95	109	64	41	30	28	6	1.11028	0.743391	0.818547	0.30487	1.87858	3.01519	5.15568	2.45272	0.295364	0.263691	0.414344	1.09665
tca-mir-3810-5p	1152	16503	1382	2198	2349	813	2880	3512	3684	2296	2043	1529	1331	182	116	180	192	74	274	334	349	229	137	103	93	9	1.81553	2.07527	2.14733	2.11145	8.2085	10.2296	10.5494	8.56279	0.16779	0.201241	0.329459	0.0836211
tca-mir-3811c-1-5p	317	16503	1382	2198	2349	813	2880	3512	3684	2296	2043	1529	1331	182	26	40	44	13	79	102	102	68	43	28	27	4	0.307302	0.217517	0.273448	0.154177	3.56359	5.72962	4.77589	4.08798	0.640472	0.253611	0.474866	0.564943
tca-mir-3811c-2-5p	317	16503	1382	2198	2349	813	2880	3512	3684	2296	2043	1529	1331	182	26	40	44	13	79	102	102	68	43	28	27	4	0.307302	0.217517	0.273448	0.154177	3.56359	5.72962	4.77589	4.08798	0.640472	0.253611	0.474866	0.564943
tca-mir-3811d-5p	327	16503	1382	2198	2349	813	2880	3512	3684	2296	2043	1529	1331	182	32	41	45	18	83	105	111	72	29	32	25	2	0.820355	0.203746	0.252407	0.583306	3.98778	5.82358	6.37228	4.67088	0.012043	0.483891	0.251452	0.153193
tca-mir-3811e-5p	379	16503	1382	2198	2349	813	2880	3512	3684	2296	2043	1529	1331	182	34	58	60	20	78	107	115	67	40	29	31	6	0.52882	0.95304	0.783758	0.494419	1.32217	3.32033	4.01415	1.81143	0.073316	0.0741087	0.377051	0.897352
tca-mir-3812-3p	193	16503	1382	2198	2349	813	2880	3512	3684	2296	2043	1529	1331	182	21	38	35	14	47	62	61	38	25	18	14	1	1.06731	2.32323	1.28533	1.26337	2.25132	3.82387	2.9902	2.01184	0.452018	0.370685	0.222991	0.200034
tca-mir-3812-5p	1059	16503	1382	2198	2349	813	2880	3512	3684	2296	2043	1529	1331	182	89	156	159	56	235	288	304	189	122	102	97	5	0.339865	1.12094	0.674126	0.586978	4.72868	6.0339	6.66876	4.05561	0.0992803	0.505852	1.09078	0.00925835
tca-mir-3813-3p	341	16503	1382	2198	2349	813	2880	3512	3684	2296	2043	1529	1331	182	34	42	46	20	70	98	105	57	48	30	34	3	0.914478	0.170444	0.208332	0.761579	1.22999	3.39733	4.01134	1.23117	0.828541	0.242267	1.07987	0.283224
tca-mir-3813-5p	906	16503	1382	2198	2349	813	2880	3512	3684	2296	2043	1529	1331	182	78	123	123	41	224	257	260	182	124	79	74	9	0.434513	0.415598	0.154482	0.165026	8.28575	7.07141	5.78452	7.25876	0.99405	0.157384	0.373753	0.263435
tca-mir-3814-3p	399	16503	1382	2198	2349	813	2880	3512	3684	2296	2043	1529	1331	182	31	63	69	18	93	101	107	72	54	35	34	6	0.201531	1.19498	1.4521	0.225837	2.98298	1.665	1.86169	2.10048	0.66967	0.22699	0.487158	0.81578
tca-mir-3814-5p	2099	16503	1382	2198	2349	813	2880	3512	3684	2296	2043	1529	1331	182	215	343	363	124	423	529	555	333	269	222	175	17	3.26906	5.05421	4.93803	1.89175	3.58145	5.77519	6.09513	2.54062	0.609696	1.88724	0.530418	0.0456071
tca-mir-3815-3p	300	16503	1382	2198	2349	813	2880	3512	3684	2296	2043	1529	1331	182	25	46	44	9	79	85	82	59	43	30	24	2	0.339847	0.880084	0.425375	0.0317337	4.41805	2.85238	1.78245	2.6752	0.882154	0.542047	0.334805	0.189685
tca-mir-3815-5p	127	16503	1382	2198	2349	813	2880	3512	3684	2296	2043	1529	1331	182	9	11	13	5	35	36	41	30	10	13	11	0	0.202268	0.0325484	0.0549528	0.221702	2.8107	1.64901	2.46651	2.97715	0.0328915	0.541961	0.485574	0.121028
tca-mir-3816-3p	140	16503	1382	2198	2349	813	2880	3512	3684	2296	2043	1529	1331	182	12	22	21	5	28	37	42	20	16	11	12	1	0.408012	0.777204	0.465573	0.15908	0.744074	1.23676	1.88665	0.408277	0.242039	0.184033	0.468913	0.338636
tca-mir-3816-5p	423	16503	1382	2198	2349	813	2880	3512	3684	2296	2043	1529	1331	182	45	61	60	26	98	123	123	74	38	40	30	2	1.39445	0.647985	0.321226	0.992087	3.0089	4.29801	3.38141	1.82438	0.00705321	0.393672	0.131372	0.0710056
tca-mir-3817-3p	1092	16503	1382	2198	2349	813	2880	3512	3684	2296	2043	1529	1331	182	108	175	189	66	260	320	332	218	118	108	85	12	1.53606	2.47429	2.84605	1.4429	7.85894	10.4069	10.257	8.33762	0.024307	0.671647	0.213678	0.367491
tca-mir-3818-5p	322	16503	1382	2198	2349	813	2880	3512	3684	2296	2043	1529	1331	182	28	40	46	13	76	94	108	60	36	39	22	1	0.433723	0.18875	0.346805	0.141103	2.73573	3.54718	5.93999	2.16355	0.147254	1.46534	0.119667	0.0587934
tca-mir-3820-5p	448	16503	1382	2198	2349	813	2880	3512	3684	2296	2043	1529	1331	182	52	74	69	27	99	121	132	76	62	48	48	8	2.18415	1.6867	0.669158	0.932294	2.35574	2.84672	3.84185	1.56313	0.815202	0.90241	1.74919	1.21758
tca-mir-3821-3p	705	16503	1382	2198	2349	813	2880	3512	3684	2296	2043	1529	1331	182	71	109	111	43	166	209	213	136	79	51	50	3	1.3511	1.39069	0.956023	1.19998	4.96953	7.43978	6.58035	4.67225	0.0874052	0.0133001	0.0889367	0.0200479
tca-mir-3822-3p	1583	16503	1382	2198	2349	813	2880	3512	3684	2296	2043	1529	1331	182	144	222	242	82	346	413	453	274	186	146	132	11	0.892968	0.740574	1.01025	0.541921	6.0298	6.19483	9.53014	4.56718	0.110515	0.299301	0.499465	0.0265248
tca-mir-3824-3p	547	16503	1382	2198	2349	813	2880	3512	3684	2296	2043	1529	1331	182	43	76	78	23	141	166	180	112	64	51	49	2	0.197447	0.499857	0.334676	0.124319	6.58767	6.78821	8.57129	5.1499	0.180612	0.352979	0.713528	0.025337
tca-mir-3824-5p	2195	16503	1382	2198	2349	813	2880	3512	3684	2296	2043	1529	1331	182	253	366	381	155	465	588	610	382	254	191	182	18	7.80636	6.25926	5.32672	6.05817	6.26576	10.8084	10.3726	6.4907	0.0528713	0.0831806	0.494587	0.0466755
tca-mir-3825-3p	102	16503	1382	2198	2349	813	2880	3512	3684	2296	2043	1529	1331	182	11	16	14	5	17	25	33	15	4	9	7	1	0.839194	0.71176	0.311034	0.410643	0.283917	0.750532	2.16181	0.464917	0.00136736	0.323602	0.232318	0.508007
tca-mir-3825-5p	1028	16503	1382	2198	2349	813	2880	3512	3684	2296	2043	1529	1331	182	87	156	164	61	253	297	318	207	113	97	89	7	0.367175	1.47647	1.31405	1.25043	9.07912	8.96958	10.8135	8.26024	0.0398484	0.401977	0.665208	0.0523535
tca-mir-3826-3p	81	16503	1382	2198	2349	813	2880	3512	3684	2296	2043	1529	1331	182	9	11	13	5	11	21	22	10	10	10	4	0	0.859102	0.405294	0.589154	0.680074	0.109845	0.905068	0.920228	0.234055	0.376321	0.896067	0.10109	0.226496
tca-mir-3826-5p	82	16503	1382	2198	2349	813	2880	3512	3684	2296	2043	1529	1331	182	4	8	10	2	16	21	25	14	13	14	6	1	0.082412	0.107624	0.19911	0.110288	0.592543	0.861817	1.50264	0.794156	0.880572	2.10795	0.30496	0.640542
tca-mir-3827-3p	1997	16503	1382	2198	2349	813	2880	3512	3684	2296	2043	1529	1331	182	183	293	301	98	434	526	585	362	251	206	169	17	1.08753	1.55834	0.921716	0.310074	7.18362	8.45807	14.4775	8.11267	0.424977	1.39839	0.641133	0.0704917
tca-mir-3827-5p	389	16503	1382	2198	2349	813	2880	3512	3684	2296	2043	1529	1331	182	29	51	53	17	94	109	127	71	48	42	26	3	0.148837	0.291029	0.220289	0.192133	3.56358	3.23706	6.09921	2.19912	0.326737	0.893871	0.0862402	0.204047
tca-mir-3828-3p	174	16503	1382	2198	2349	813	2880	3512	3684	2296	2043	1529	1331	182	15	24	28	8	37	48	53	35	17	19	11	0	0.413676	0.427267	0.687819	0.310582	1.10351	1.72962	2.32804	2.05873	0.083878	0.732899	0.12216	0.0673887
tca-mir-3828-5p	619	16503	1382	2198	2349	813	2880	3512	3684	2296	2043	1529	1331	182	58	88	88	35	141	162	176	103	76	58	53	3	0.790695	0.637024	0.321953	0.76757	3.63258	2.88805	3.92125	1.6626	0.300457	0.367856	0.53681	0.0390207
tca-mir-3829-5p	210	16503	1382	2198	2349	813	2880	3512	3684	2296	2043	1529	1331	182	26	30	31	15	47	53	70	36	20	22	14	2	1.77565	0.528196	0.435609	1.25299	1.57832	1.15639	4.08197	1.12419	0.0559968	0.641296	0.139273	0.388101
tca-mir-3831-3p	448	16503	1382	2198	2349	813	2880	3512	3684	2296	2043	1529	1331	182	54	61	75	28	89	115	124	76	52	51	37	4	2.58289	0.406406	1.24924	1.08979	1.1058	1.98801	2.5333	1.56313	0.179526	1.2777	0.401773	0.257865
tca-mir-3832-3p	953	16503	1382	2198	2349	813	2880	3512	3684	2296	2043	1529	1331	182	96	144	148	55	209	245	280	175	106	93	78	12	1.61265	1.35678	0.955843	1.01825	3.96131	3.49076	7.16591	4.48768	0.0562809	0.56601	0.382205	0.596047
tca-mir-3832-5p	439	16503	1382	2198	2349	813	2880	3512	3684	2296	2043	1529	1331	182	43	61	57	30	100	123	131	80	50	57	50	7	0.916684	0.483809	0.123542	1.54774	2.79962	3.54838	4.08761	2.36558	0.14884	2.43796	2.28049	0.945732
tca-mir-3833-3p	1075	16503	1382	2198	2349	813	2880	3512	3684	2296	2043	1529	1331	182	106	168	171	61	241	290	316	196	132	101	96	9	1.48761	1.98092	1.3087	0.965517	5.16261	5.74889	8.03647	4.74891	0.285665	0.383763	0.889761	0.122118
tca-mir-3833-5p	250	16503	1382	2198	2349	813	2880	3512	3684	2296	2043	1529	1331	182	23	37	32	16	61	75	77	51	30	27	22	3	0.567209	0.672136	0.149891	0.950558	2.70504	3.37779	3.17137	2.76996	0.279634	0.77141	0.545694	0.526093
tca-mir-3834-3p	466	16503	1382	2198	2349	813	2880	3512	3684	2296	2043	1529	1331	182	39	73	73	26	107	126	137	85	54	45	34	4	0.338146	1.2262	0.777069	0.663483	3.06811	2.95228	3.9088	2.47849	0.173572	0.460192	0.156803	0.231044
tca-mir-3835-3p	250	16503	1382	2198	2349	813	2880	3512	3684	2296	2043	1529	1331	182	21	31	36	14	59	75	80	52	29	27	12	5	0.360195	0.204549	0.370944	0.598773	2.29803	3.37779	3.84983	3.00617	0.220449	0.77141	0.0131983	1.22955
tca-mir-3835-5p	539	16503	1382	2198	2349	813	2880	3512	3684	2296	2043	1529	1331	182	53	74	76	32	125	164	173	105	70	57	44	10	1.02086	0.445465	0.296346	0.934	3.64064	6.79793	7.40066	3.9566	0.517379	0.893781	0.370294	1.43356
tca-mir-3836a-3p	195	16503	1382	2198	2349	813	2880	3512	3684	2296	2043	1529	1331	182	39	36	31	17	41	56	63	37	23	17	17	3	7.06297	1.79982	0.66322	2.10487	1.0929	2.27836	3.34184	1.73037	0.263472	0.265178	0.509209	0.771858
tca-mir-3836a-5p	217	16503	1382	2198	2349	813	2880	3512	3684	2296	2043	1529	1331	182	11	24	28	5	61	66	67	44	26	23	20	3	0.0190589	0.0911474	0.171852	0.0179262	4.50268	3.2522	2.89843	2.45098	0.284028	0.681004	0.654951	0.660995
tca-mir-3836b-3p	195	16503	1382	2198	2349	813	2880	3512	3684	2296	2043	1529	1331	182	39	36	31	17	41	56	63	37	23	17	17	3	7.06297	1.79982	0.66322	2.10487	1.0929	2.27836	3.34184	1.73037	0.263472	0.265178	0.509209	0.771858
tca-mir-3836b-5p	237	16503	1382	2198	2349	813	2880	3512	3684	2296	2043	1529	1331	182	20	37	36	12	57	70	74	45	28	20	16	2	0.370094	0.893685	0.527567	0.413761	2.43313	3.00329	3.27044	1.94939	0.254258	0.208551	0.137615	0.312512
tca-mir-3838-3p	351	16503	1382	2198	2349	813	2880	3512	3684	2296	2043	1529	1331	182	31	51	46	16	78	99	104	63	37	42	33	4	0.477562	0.651922	0.155512	0.248361	2.07042	3.117	3.29293	1.87947	0.0782499	1.45028	0.81836	0.461528
tca-mir-3838-5p	925	16503	1382	2198	2349	813	2880	3512	3684	2296	2043	1529	1331	182	93	142	156	60	244	271	298	195	104	77	67	6	1.56256	1.53736	2.04009	1.91764	11.9951	8.88039	12.4557	9.48985	0.0714031	0.0806423	0.0912762	0.0504623
tca-mir-3839-5p	729	16503	1382	2198	2349	813	2880	3512	3684	2296	2043	1529	1331	182	80	120	133	45	166	210	212	134	73	74	48	10	2.29187	2.2623	3.05308	1.29687	4.13474	6.43233	5.263	3.62385	0.0108442	0.742728	0.0329569	0.738847
tca-mir-3840-3p	316	16503	1382	2198	2349	813	2880	3512	3684	2296	2043	1529	1331	182	52	66	66	35	70	87	90	59	34	33	23	7	6.10194	4.20354	3.35664	5.60124	1.90054	2.50494	2.40162	2.15875	0.105138	0.695364	0.185784	1.61673
tca-mir-3840-5p	173	16503	1382	2198	2349	813	2880	3512	3684	2296	2043	1529	1331	182	16	28	23	12	48	57	64	46	18	18	17	1	0.551955	0.951332	0.23086	1.06636	3.59566	3.91996	5.43543	5.50218	0.127419	0.60056	0.798277	0.243165
tca-mir-3841-3p	276	16503	1382	2198	2349	813	2880	3512	3684	2296	2043	1529	1331	182	45	46	43	23	58	80	89	50	36	19	27	0	5.30552	1.35352	0.639846	2.29369	1.28506	3.04233	4.32036	1.70641	0.485329	0.0449164	0.909755	0.0202944
tca-mir-3841-5p	268	16503	1382	2198	2349	813	2880	3512	3684	2296	2043	1529	1331	182	23	46	45	17	70	77	80	51	29	26	20	5	0.402056	1.54781	1.00201	0.944664	3.89929	2.84082	2.8189	2.12788	0.12475	0.453003	0.230451	1.11487
tca-mir-3842-3p	532	16503	1382	2198	2349	813	2880	3512	3684	2296	2043	1529	1331	182	54	81	91	37	108	132	143	89	68	63	42	4	1.22241	1.06759	1.59436	1.85386	1.4382	1.69225	2.29406	1.57641	0.447574	1.74579	0.285825	0.153372
tca-mir-3842-5p	421	16503	1382	2198	2349	813	2880	3512	3684	2296	2043	1529	1331	182	41	57	55	19	91	119	130	74	52	55	40	11	0.873575	0.385576	0.13619	0.222104	1.96002	3.62483	4.82873	1.87067	0.327826	2.43621	0.923485	2.60023
tca-mir-3843-3p	1037	16503	1382	2198	2349	813	2880	3512	3684	2296	2043	1529	1331	182	135	183	180	78	212	275	298	175	136	102	91	8	7.20257	4.74519	2.79861	4.17064	2.35648	4.86377	6.59462	2.63187	0.671155	0.625841	0.753161	0.0890329
tca-mir-3843-5p	746	16503	1382	2198	2349	813	2880	3512	3684	2296	2043	1529	1331	182	61	96	96	34	181	217	226	151	86	71	70	6	0.263116	0.20799	0.0701963	0.191076	6.23686	6.97747	7.04021	6.34782	0.127918	0.427607	1.09757	0.142112
tca-mir-3849-3p	674	16503	1382	2198	2349	813	2880	3512	3684	2296	2043	1529	1331	182	50	91	109	34	147	187	216	122	93	75	50	7	0.0973612	0.381195	1.18512	0.400387	2.89406	4.70453	8.97732	3.10094	0.936173	1.38636	0.150608	0.330511
tca-mir-3849-5p	1188	16503	1382	2198	2349	813	2880	3512	3684	2296	2043	1529	1331	182	119	173	186	64	284	339	360	228	141	102	92	8	1.78257	1.05028	1.16656	0.696253	8.7268	9.47755	10.8874	7.18411	0.159801	0.106376	0.194687	0.0389681
tca-mir-3850-3p	329	16503	1382	2198	2349	813	2880	3512	3684	2296	2043	1529	1331	182	31	36	47	19	73	97	99	60	33	26	28	1	0.676398	0.0522033	0.346518	0.709342	1.9683	3.80505	3.42988	1.96466	0.0499249	0.110865	0.474336	0.0550298
tca-mir-3851a-1-3p	659	16503	1382	2198	2349	813	2880	3512	3684	2296	2043	1529	1331	182	91	120	111	52	153	178	200	127	72	61	55	5	6.17778	3.92547	1.62163	3.5164	4.30775	3.83147	6.37783	4.39372	0.0633725	0.32888	0.444227	0.131307
tca-mir-3851a-1-5p	1099	16503	1382	2198	2349	813	2880	3512	3684	2296	2043	1529	1331	182	103	162	163	62	259	303	314	200	134	121	103	13	1.00205	1.15089	0.581798	0.937984	7.40595	6.91091	6.65678	4.78044	0.256124	1.72525	1.33278	0.48506
tca-mir-3851a-2-3p	659	16503	1382	2198	2349	813	2880	3512	3684	2296	2043	1529	1331	182	91	120	111	52	153	178	200	127	72	61	55	5	6.17778	3.92547	1.62163	3.5164	4.30775	3.83147	6.37783	4.39372	0.0633725	0.32888	0.444227	0.131307
tca-mir-3851a-2-5p	1099	16503	1382	2198	2349	813	2880	3512	3684	2296	2043	1529	1331	182	103	162	163	62	259	303	314	200	134	121	103	13	1.00205	1.15089	0.581798	0.937984	7.40595	6.91091	6.65678	4.78044	0.256124	1.72525	1.33278	0.48506
tca-mir-3851b-3p	368	16503	1382	2198	2349	813	2880	3512	3684	2296	2043	1529	1331	182	66	68	65	32	79	106	118	70	39	31	28	2	9.03577	2.72735	1.57702	3.17032	1.72386	3.648	5.30318	2.62814	0.0789982	0.170822	0.236065	0.110564
tca-mir-3851b-5p	1099	16503	1382	2198	2349	813	2880	3512	3684	2296	2043	1529	1331	182	103	162	163	62	259	303	314	200	134	121	103	13	1.00205	1.15089	0.581798	0.937984	7.40595	6.91091	6.65678	4.78044	0.256124	1.72525	1.33278	0.48506
tca-mir-3851c-3p	320	16503	1382	2198	2349	813	2880	3512	3684	2296	2043	1529	1331	182	56	58	53	25	70	92	106	63	33	29	25	2	7.43273	2.25534	0.994429	2.06111	1.77862	3.24566	5.56288	2.81362	0.0688713	0.299897	0.288722	0.161927
tca-mir-3851c-5p	957	16503	1382	2198	2349	813	2880	3512	3684	2296	2043	1529	1331	182	94	141	132	51	233	281	290	185	95	94	81	10	1.35082	1.06672	0.197133	0.605896	7.96931	9.29624	8.85936	6.15769	0.00379974	0.603862	0.530132	0.311294
tca-mir-3851d-3p	279	16503	1382	2198	2349	813	2880	3512	3684	2296	2043	1529	1331	182	27	37	41	18	77	93	89	60	25	18	24	2	0.739945	0.330186	0.429583	1.01619	5.1098	6.04784	4.12777	3.74336	0.0196886	0.025805	0.494498	0.223943
tca-mir-3851d-5p	320	16503	1382	2198	2349	813	2880	3512	3684	2296	2043	1529	1331	182	56	58	53	25	70	92	106	63	33	29	25	2	7.43273	2.25534	0.994429	2.06111	1.77862	3.24566	5.56288	2.81362	0.0688713	0.299897	0.288722	0.161927
tca-mir-3851e-3p	320	16503	1382	2198	2349	813	2880	3512	3684	2296	2043	1529	1331	182	56	58	53	25	70	92	106	63	33	29	25	2	7.43273	2.25534	0.994429	2.06111	1.77862	3.24566	5.56288	2.81362	0.0688713	0.299897	0.288722	0.161927
tca-mir-3851e-5p	315	16503	1382	2198	2349	813	2880	3512	3684	2296	2043	1529	1331	182	32	37	42	19	71	99	110	62	42	33	23	4	0.971605	0.113828	0.192365	0.830105	2.09512	5.09321	7.03778	2.77904	0.571641	0.706754	0.189908	0.571707
tca-mir-3851f-3p	320	16503	1382	2198	2349	813	2880	3512	3684	2296	2043	1529	1331	182	56	58	53	25	70	92	106	63	33	29	25	2	7.43273	2.25534	0.994429	2.06111	1.77862	3.24566	5.56288	2.81362	0.0688713	0.299897	0.288722	0.161927
tca-mir-3851f-5p	315	16503	1382	2198	2349	813	2880	3512	3684	2296	2043	1529	1331	182	32	37	42	19	71	99	110	62	42	33	23	4	0.971605	0.113828	0.192365	0.830105	2.09512	5.09321	7.03778	2.77904	0.571641	0.706754	0.189908	0.571707
tca-mir-3853-3p	2874	16503	1382	2198	2349	813	2880	3512	3684	2296	2043	1529	1331	182	269	441	441	153	603	742	777	495	334	291	263	28	1.76244	3.62581	1.5351	0.887072	7.50504	10.2403	10.6398	7.82863	0.0417338	1.41864	2.0389	0.136229
tca-mir-3854-3p	456	16503	1382	2198	2349	813	2880	3512	3684	2296	2043	1529	1331	182	46	65	63	21	96	124	128	80	49	49	41	5	1.0969	0.602416	0.244164	0.242618	1.72356	3.01731	2.83182	1.94569	0.0746793	0.9248	0.692742	0.40986
tca-mir-3854-5p	830	16503	1382	2198	2349	813	2880	3512	3684	2296	2043	1529	1331	182	88	132	140	49	165	228	233	136	107	83	73	14	2.05287	1.91981	1.89862	1.09085	1.55652	5.24076	4.54349	1.77627	0.52196	0.68356	0.711699	1.38278
tca-mir-3855-3p	618	16503	1382	2198	2349	813	2880	3512	3684	2296	2043	1529	1331	182	69	97	94	46	139	171	181	107	71	57	41	4	2.24388	1.44801	0.657616	2.68069	3.34257	4.2991	4.80108	2.18832	0.136396	0.319442	0.0468204	0.0881505
tca-mir-3855-5p	601	16503	1382	2198	2349	813	2880	3512	3684	2296	2043	1529	1331	182	61	96	95	38	145	181	186	117	69	61	49	6	1.30093	1.61641	0.92391	1.31776	5.0133	7.068	6.62296	4.30425	0.137381	0.697646	0.366447	0.304638
tca-mir-3857-5p	1411	16503	1382	2198	2349	813	2880	3512	3684	2296	2043	1529	1331	182	131	211	226	73	297	380	408	242	159	161	106	17	1.03898	1.55181	1.66485	0.523094	3.93499	7.28417	9.22939	3.83703	0.0451475	2.70025	0.113131	0.532363
tca-mir-3858a-1-3p	377	16503	1382	2198	2349	813	2880	3512	3684	2296	2043	1529	1331	182	33	52	56	19	89	113	121	74	47	35	31	3	0.455484	0.447315	0.480154	0.399065	3.07042	4.63237	5.43788	3.12406	0.356066	0.346785	0.389755	0.22155
tca-mir-3858a-1-5p	426	16503	1382	2198	2349	813	2880	3512	3684	2296	2043	1529	1331	182	43	76	73	31	86	112	121	68	47	31	24	3	1.06736	2.52829	1.42082	1.92583	1.22159	2.28491	2.91864	1.01349	0.107667	0.0387558	0.0145871	0.158026
tca-mir-3859-3p	3432	16503	1382	2198	2349	813	2880	3512	3684	2296	2043	1529	1331	182	376	552	574	213	685	893	935	553	401	335	275	25	8.97649	7.19756	5.77213	4.20678	5.10936	13.533	14.0625	4.78468	0.0391452	0.908328	0.272342	0.00403222
tca-mir-3859-5p	122	16503	1382	2198	2349	813	2880	3512	3684	2296	2043	1529	1331	182	11	14	15	5	33	33	38	26	15	12	11	3	0.490021	0.173488	0.169022	0.251313	2.55452	1.29788	2.05864	2.05342	0.353565	0.467781	0.55445	1.33583
tca-mir-3860-5p	537	16503	1382	2198	2349	813	2880	3512	3684	2296	2043	1529	1331	182	57	92	96	36	132	154	166	106	55	34	30	2	1.57347	2.36521	2.14975	1.603	5.05973	4.8131	5.96416	4.22415	0.0311164	0.0035155	0.00699866	0.0275836
tca-mir-3861-5p	928	16503	1382	2198	2349	813	2880	3512	3684	2296	2043	1529	1331	182	75	126	134	42	207	243	252	164	94	91	92	7	0.221134	0.417149	0.393521	0.163243	4.38714	3.99207	3.80563	3.40019	0.00719917	0.58953	1.7893	0.0918135
tca-mir-3862-3p	259	16503	1382	2198	2349	813	2880	3512	3684	2296	2043	1529	1331	182	28	46	44	18	58	66	67	46	26	20	20	0	1.17934	1.79118	1.0552	1.2632	1.78813	1.36569	1.12763	1.48958	0.0676174	0.112796	0.281316	0.0247053
tca-mir-3862-5p	284	16503	1382	2198	2349	813	2880	3512	3684	2296	2043	1529	1331	182	21	33	37	11	59	77	78	52	50	38	28	4	0.166758	0.111067	0.163378	0.126228	1.21414	2.12646	1.77894	1.83082	2.41341	2.08283	0.951966	0.687833
tca-mir-3864-3p	411	16503	1382	2198	2349	813	2880	3512	3684	2296	2043	1529	1331	182	35	53	49	18	87	119	128	77	40	47	34	2	0.383264	0.247338	0.0443175	0.189618	1.68018	4.09806	4.96642	2.62655	0.0242414	1.25356	0.405307	0.0782585
tca-mir-3865-5p	347	16503	1382	2198	2349	813	2880	3512	3684	2296	2043	1529	1331	182	36	50	48	24	64	76	86	46	46	37	30	4	1.11915	0.612887	0.261138	1.42971	0.548135	0.44553	0.919873	0.219522	0.560069	0.800908	0.521036	0.47264
tca-mir-3866-5p	452	16503	1382	2198	2349	813	2880	3512	3684	2296	2043	1529	1331	182	59	80	80	31	107	121	126	82	44	52	41	5	3.62256	2.52511	1.80571	1.59504	3.57656	2.69841	2.68088	2.35308	0.0201056	1.35944	0.728278	0.418758
tca-mir-3867-5p	599	16503	1382	2198	2349	813	2880	3512	3684	2296	2043	1529	1331	182	70	100	103	42	110	141	156	83	61	56	48	4	2.75596	2.17141	1.77864	2.06431	0.594388	1.10714	1.90661	0.312644	0.0232558	0.360711	0.318268	0.0998368
tca-mir-3869-3p	292	16503	1382	2198	2349	813	2880	3512	3684	2296	2043	1529	1331	182	35	48	48	20	68	78	86	50	24	23	17	1	1.9102	1.29461	0.914491	1.27131	2.3812	1.97723	2.7776	1.30817	0.00647109	0.118368	0.0412054	0.0780367
tca-mir-3872-5p	996	16503	1382	2198	2349	813	2880	3512	3684	2296	2043	1529	1331	182	94	135	137	49	191	276	284	158	108	93	80	10	1.01387	0.410603	0.185679	0.331614	1.186	6.55463	5.9979	1.50136	0.0310906	0.356488	0.313416	0.265575
tca-mir-3877-5p	497	16503	1382	2198	2349	813	2880	3512	3684	2296	2043	1529	1331	182	52	79	79	28	122	143	146	99	44	52	42	3	1.39504	1.4004	0.894189	0.706683	4.70982	4.60591	4.09477	4.15611	0.00319555	0.808718	0.473179	0.0958113
tca-mir-3880-3p	362	16503	1382	2198	2349	813	2880	3512	3684	2296	2043	1529	1331	182	27	56	56	20	78	93	96	64	45	45	38	3	0.155491	1.00269	0.652799	0.602393	1.74738	1.74759	1.61419	1.76224	0.348367	1.76415	1.41094	0.245472
tca-mir-3880-5p	557	16503	1382	2198	2349	813	2880	3512	3684	2296	2043	1529	1331	182	72	102	102	42	100	127	134	85	70	71	55	5	4.09859	3.54452	2.56242	2.61873	0.455381	0.763808	0.833713	0.797972	0.382869	2.63755	1.29795	0.235802
tca-mir-3881-3p	914	16503	1382	2198	2349	813	2880	3512	3684	2296	2043	1529	1331	182	89	144	141	54	207	247	262	163	121	85	74	14	1.23592	1.89976	0.873533	1.14762	4.81868	5.05207	5.7813	3.575	0.713857	0.340862	0.342115	1.09394
tca-mir-3881-5p	1148	16503	1382	2198	2349	813	2880	3512	3684	2296	2043	1529	1331	182	92	164	168	49	250	304	333	196	141	121	98	10	0.18581	0.828977	0.487966	0.0752994	4.39038	5.25542	7.76316	3.12227	0.284933	1.24356	0.600577	0.137695
tca-mir-3882-3p	568	16503	1382	2198	2349	813	2880	3512	3684	2296	2043	1529	1331	182	63	87	86	34	120	155	170	100	51	56	46	5	2.0504	1.15278	0.61504	0.991956	2.03427	3.65666	5.14436	2.30137	0.0025129	0.553009	0.347802	0.221699
tca-mir-3882-5p	776	16503	1382	2198	2349	813	2880	3512	3684	2296	2043	1529	1331	182	77	131	131	47	187	236	255	154	85	60	54	4	1.29223	2.8102	1.82871	1.21375	6.20492	9.42199	11.76	5.92198	0.0545179	0.0322499	0.0637637	0.029736
tca-mir-3883-3p	500	16503	1382	2198	2349	813	2880	3512	3684	2296	2043	1529	1331	182	49	83	87	29	108	131	148	87	56	53	27	2	0.968918	1.86086	1.72349	0.813982	2.1854	2.49206	4.31761	1.96273	0.113816	0.881256	0.00559181	0.0376619
tca-mir-3883-5p	597	16503	1382	2198	2349	813	2880	3512	3684	2296	2043	1529	1331	182	56	97	100	31	138	167	175	113	61	49	45	3	0.786646	1.81113	1.46664	0.47435	3.86997	4.49123	4.6912	3.67169	0.0247713	0.0986397	0.18623	0.0460634
tca-mir-3884-3p	187	16503	1382	2198	2349	813	2880	3512	3684	2296	2043	1529	1331	182	12	19	17	6	58	58	64	42	21	18	14	2	0.098883	0.0548323	0.0100058	0.0860504	5.77502	3.19475	4.19377	3.28992	0.197454	0.430285	0.261229	0.468079
tca-mir-3884-5p	535	16503	1382	2198	2349	813	2880	3512	3684	2296	2043	1529	1331	182	54	93	88	32	119	147	159	102	60	50	34	5	1.18688	2.57031	1.20522	0.964674	2.78765	3.65336	4.68138	3.50709	0.110219	0.360143	0.0352468	0.266503
tca-mir-3889-3p	265	16503	1382	2198	2349	813	2880	3512	3684	2296	2043	1529	1331	182	39	48	41	21	50	70	83	41	36	22	26	2	3.72069	1.99166	0.605838	1.92507	0.61789	1.7377	3.61317	0.695273	0.619881	0.179802	0.908269	0.250182
tca-mir-3889-5p	810	16503	1382	2198	2349	813	2880	3512	3684	2296	2043	1529	1331	182	82	123	127	47	162	217	230	141	99	77	56	10	1.51167	1.29432	0.978262	0.978471	1.62368	4.26992	4.85279	2.75502	0.276658	0.425978	0.0555025	0.549568
tca-mir-3892-3p	1036	16503	1382	2198	2349	813	2880	3512	3684	2296	2043	1529	1331	182	102	143	158	61	223	281	289	185	114	99	90	6	1.43887	0.524908	0.808674	1.1981	3.67251	5.79884	5.23141	3.99753	0.0403071	0.462771	0.687892	0.0250397
tca-mir-3892-5p	110	16503	1382	2198	2349	813	2880	3512	3684	2296	2043	1529	1331	182	11	18	21	7	26	32	35	24	17	12	9	2	0.6794	0.853834	1.22522	0.756772	1.43265	1.70637	2.11546	2.08906	0.882318	0.66273	0.403628	0.914267
tca-mir-3893-3p	1018	16503	1382	2198	2349	813	2880	3512	3684	2296	2043	1529	1331	182	127	175	168	69	206	274	297	170	117	94	80	7	5.80339	3.93302	1.80381	2.55113	2.11149	5.38215	7.24241	2.3858	0.0980389	0.312849	0.244103	0.055467
tca-mir-3893-5p	541	16503	1382	2198	2349	813	2880	3512	3684	2296	2043	1529	1331	182	50	77	79	31	134	162	169	113	49	60	46	2	0.690027	0.62079	0.428643	0.787405	5.30472	6.24065	6.37879	5.6138	0.00359768	1.20901	0.499252	0.026663
tca-mir-3897-5p	456	16503	1382	2198	2349	813	2880	3512	3684	2296	2043	1529	1331	182	35	66	69	19	113	138	132	88	51	49	30	3	0.173295	0.680933	0.57982	0.132895	4.61433	5.71415	3.48039	3.30865	0.119338	0.9248	0.0632516	0.128136
tca-mir-3905-3p	346	16503	1382	2198	2349	813	2880	3512	3684	2296	2043	1529	1331	182	37	50	60	23	69	90	99	55	36	35	22	2	1.28952	0.625096	1.36672	1.23701	1.01098	1.85204	2.63331	0.90335	0.0692878	0.593795	0.0650288	0.13175
tca-mir-6007-3p	265	16503	1382	2198	2349	813	2880	3512	3684	2296	2043	1529	1331	182	26	32	34	14	68	85	80	59	32	23	16	3	0.777544	0.16176	0.148071	0.485272	3.56949	4.87179	2.97436	4.13577	0.289198	0.237802	0.0614123	0.474767
tca-mir-6007-5p	738	16503	1382	2198	2349	813	2880	3512	3684	2296	2043	1529	1331	182	80	124	122	42	151	184	212	124	84	77	56	6	2.15817	2.624	1.49679	0.844571	1.87543	2.18985	4.87907	1.99842	0.106689	0.924109	0.182708	0.148462
tca-mir-6012-3p	199	16503	1382	2198	2349	813	2880	3512	3684	2296	2043	1529	1331	182	18	34	30	9	46	63	67	38	30	23	20	4	0.51041	1.29616	0.492485	0.283626	1.79752	3.66873	4.09553	1.79978	0.981015	0.961966	0.907269	1.15702
tca-mir-6012-5p	476	16503	1382	2198	2349	813	2880	3512	3684	2296	2043	1529	1331	182	46	64	74	32	110	139	142	88	66	32	31	2	0.874862	0.362552	0.735823	1.51631	3.23872	4.85003	4.3551	2.71361	0.845163	0.0120871	0.0543173	0.0459824
tca-mir-6016-3p	99	16503	1382	2198	2349	813	2880	3512	3684	2296	2043	1529	1331	182	11	12	14	9	30	34	35	24	8	8	8	1	0.907335	0.246564	0.356743	1.62191	3.27559	3.06288	2.99103	2.7287	0.0563847	0.240574	0.392461	0.525434
tca-mir-6016-5p	476	16503	1382	2198	2349	813	2880	3512	3684	2296	2043	1529	1331	182	45	76	76	28	96	116	128	78	50	37	37	3	0.766604	1.40863	0.909832	0.85494	1.28451	1.35913	2.13297	1.28428	0.0532862	0.0675537	0.25831	0.111265
tca-mir-6017-3p	998	16503	1382	2198	2349	813	2880	3512	3684	2296	2043	1529	1331	182	112	157	163	69	193	244	268	154	118	105	82	8	3.28111	1.99142	1.61958	2.76614	1.30566	2.24126	3.66111	1.14674	0.161943	1.13681	0.398554	0.108833
tca-mir-6018-5p	490	16503	1382	2198	2349	813	2880	3512	3684	2296	2043	1529	1331	182	43	77	82	24	104	119	138	77	68	52	34	6	0.474986	1.2856	1.30573	0.339441	1.9095	1.34005	3.05661	0.960503	0.860003	0.880845	0.0972639	0.527304
tca-mir-7-3p	710	16503	1382	2198	2349	813	2880	3512	3684	2296	2043	1529	1331	182	70	123	116	45	153	202	215	129	71	57	52	8	1.18215	3.10317	1.32791	1.45705	2.75689	5.80617	6.71775	3.30391	0.0112863	0.0633526	0.127427	0.416766
tca-mir-7-5p	619	16503	1382	2198	2349	813	2880	3512	3684	2296	2043	1529	1331	182	47	73	77	21	148	181	187	114	69	61	62	7	0.133309	0.0654267	0.0483549	0.0172842	4.87891	6.10938	5.86892	3.2266	0.0906409	0.560773	1.49054	0.426247
tca-mir-71-3p	252	16503	1382	2198	2349	813	2880	3512	3684	2296	2043	1529	1331	182	25	42	44	13	60	64	65	45	22	27	18	0	0.805266	1.29243	1.2103	0.442883	2.41418	1.31693	1.09071	1.50801	0.0186974	0.744429	0.183767	0.026796
tca-mir-71-5p	756	16503	1382	2198	2349	813	2880	3512	3684	2296	2043	1529	1331	182	82	115	103	48	164	203	222	133	79	67	68	9	2.20137	1.26521	0.176674	1.52264	3.03663	4.10337	5.80588	2.81342	0.0237478	0.205793	0.818689	0.490179
tca-mir-750-3p	296	16503	1382	2198	2349	813	2880	3512	3684	2296	2043	1529	1331	182	27	45	46	20	64	80	85	48	32	27	27	2	0.558271	0.831492	0.640203	1.22115	1.58468	2.14349	2.41517	0.962087	0.115372	0.315789	0.669749	0.19578
tca-mir-750-5p	417	16503	1382	2198	2349	813	2880	3512	3684	2296	2043	1529	1331	182	39	56	58	21	113	125	130	91	38	41	37	3	0.690742	0.358831	0.266015	0.396699	6.6094	5.03421	5.05472	5.49175	0.00915349	0.514056	0.625745	0.16821
tca-mir-8-3p	1173	16503	1382	2198	2349	813	2880	3512	3684	2296	2043	1529	1331	182	155	218	227	92	255	310	334	202	112	97	86	8	8.64538	7.27315	6.64788	5.53662	4.41124	5.26893	6.88394	3.39754	0.000422693	0.0557277	0.0884368	0.0424523
tca-mir-8-5p	335	16503	1382	2198	2349	813	2880	3512	3684	2296	2043	1529	1331	182	35	44	48	21	73	98	106	62	32	20	19	1	1.13896	0.301016	0.354925	0.980914	1.78718	3.69862	4.57948	2.14485	0.0281027	0.00788504	0.0262034	0.0519941
tca-mir-87a-3p	680	16503	1382	2198	2349	813	2880	3512	3684	2296	2043	1529	1331	182	64	105	107	33	143	183	196	116	78	64	50	5	0.844223	1.34905	0.935835	0.309835	2.21963	3.82671	4.66398	2.10999	0.126127	0.383484	0.136577	0.115924
tca-mir-87a-5p	279	16503	1382	2198	2349	813	2880	3512	3684	2296	2043	1529	1331	182	30	44	44	21	71	81	84	56	28	28	15	1	1.19247	1.00777	0.694268	1.69099	3.57241	3.09302	3.04278	2.78817	0.061862	0.546636	0.0242664	0.088219
tca-mir-87b-3p	699	16503	1382	2198	2349	813	2880	3512	3684	2296	2043	1529	1331	182	70	114	115	38	150	189	203	123	79	65	44	4	1.29755	2.06037	1.39441	0.637598	2.64166	4.04888	5.03011	2.65875	0.100061	0.342636	0.0188158	0.0510952
tca-mir-87b-5p	435	16503	1382	2198	2349	813	2880	3512	3684	2296	2043	1529	1331	182	48	79	83	33	96	119	130	82	45	43	26	4	1.69345	2.81762	2.71984	2.26592	2.28932	3.0295	4.09464	2.82606	0.0491664	0.53644	0.0261075	0.279029
tca-mir-927a-3p	602	16503	1382	2198	2349	813	2880	3512	3684	2296	2043	1529	1331	182	65	97	98	35	118	152	160	91	71	64	50	8	1.84811	1.71943	1.18087	0.87864	1.14077	2.12473	2.28022	0.754889	0.191231	0.96905	0.424325	0.655399
tca-mir-927a-5p	996	16503	1382	2198	2349	813	2880	3512	3684	2296	2043	1529	1331	182	90	151	148	56	247	293	310	197	115	87	75	4	0.698836	1.43594	0.580877	0.880487	9.21076	9.76703	10.8987	7.27107	0.108297	0.153877	0.145323	0.00559366
tca-mir-927b-3p	185	16503	1382	2198	2349	813	2880	3512	3684	2296	2043	1529	1331	182	18	25	24	9	38	40	47	30	22	22	14	4	0.683706	0.380944	0.191817	0.368571	0.940932	0.384234	0.866462	0.811145	0.279835	1.04744	0.275143	1.26517
tca-mir-927b-5p	1229	16503	1382	2198	2349	813	2880	3512	3684	2296	2043	1529	1331	182	115	177	184	66	285	347	357	223	139	116	92	7	1.04296	0.940124	0.682798	0.687014	7.38628	9.10076	8.36484	5.16907	0.0589021	0.409319	0.117694	0.0151756
tca-mir-929-3p	260	16503	1382	2198	2349	813	2880	3512	3684	2296	2043	1529	1331	182	28	40	50	17	59	73	76	46	27	21	18	1	1.1625	0.85195	2.0032	1.03554	1.92472	2.45205	2.45274	1.46375	0.0904691	0.151936	0.150428	0.105555
tca-mir-929-5p	751	16503	1382	2198	2349	813	2880	3512	3684	2296	2043	1529	1331	182	76	133	129	50	146	197	213	121	86	62	62	4	1.4435	3.70998	2.0457	1.90283	1.18157	3.41195	4.51358	1.45478	0.11541	0.0869921	0.409619	0.0355382
tca-mir-92a-3p	665	16503	1382	2198	2349	813	2880	3512	3684	2296	2043	1529	1331	182	70	107	118	34	152	189	196	125	73	61	63	5	1.70601	1.81242	2.37176	0.435764	3.93223	5.45018	5.32716	3.84559	0.0675073	0.301645	1.10628	0.126734
tca-mir-92a-5p	186	16503	1382	2198	2349	813	2880	3512	3684	2296	2043	1529	1331	182	16	26	22	8	49	64	66	37	30	20	16	2	0.40913	0.461288	0.0984168	0.243914	3.08238	4.95773	4.86772	2.05149	1.28924	0.699234	0.479894	0.471945
tca-mir-92b-3p	672	16503	1382	2198	2349	813	2880	3512	3684	2296	2043	1529	1331	182	74	113	119	38	156	194	201	129	70	60	62	5	2.20845	2.46504	2.35648	0.788702	4.37442	6.07008	5.91752	4.36926	0.0278428	0.230432	0.934423	0.12158
tca-mir-92b-5p	215	16503	1382	2198	2349	813	2880	3512	3684	2296	2043	1529	1331	182	23	26	27	13	50	64	71	39	25	22	16	1	1.04404	0.180702	0.140222	0.75508	1.94005	2.91133	3.98266	1.49251	0.234733	0.578105	0.243505	0.16186
tca-mir-92c-3p	657	16503	1382	2198	2349	813	2880	3512	3684	2296	2043	1529	1331	182	72	107	116	34	151	192	200	125	72	60	61	5	2.11925	1.95789	2.27309	0.469207	4.03293	6.41357	6.48182	4.0803	0.0666391	0.289489	0.965278	0.132865
tca-mir-92c-5p	325	16503	1382	2198	2349	813	2880	3512	3684	2296	2043	1529	1331	182	32	38	40	19	87	106	114	70	34	31	31	5	0.844188	0.106318	0.0853858	0.742258	5.07245	6.23359	7.37887	4.24076	0.0782177	0.414222	0.856777	0.821941
tca-mir-932-3p	335	16503	1382	2198	2349	813	2880	3512	3684	2296	2043	1529	1331	182	31	56	61	18	76	89	91	60	42	29	32	6	0.616728	1.52669	1.77311	0.528927	2.26369	2.08721	1.82942	1.80536	0.372721	0.217299	0.872065	1.10721
tca-mir-932-5p	498	16503	1382	2198	2349	813	2880	3512	3684	2296	2043	1529	1331	182	49	81	95	33	97	123	129	76	50	46	47	3	0.990329	1.63146	2.99832	1.46505	0.985955	1.56405	1.61932	0.767117	0.0262856	0.32837	0.951088	0.0951282
tca-mir-965-3p	337	16503	1382	2198	2349	813	2880	3512	3684	2296	2043	1529	1331	182	42	60	53	24	75	85	92	49	33	28	27	3	2.44044	2.13582	0.720076	1.56031	2.0343	1.46979	1.90031	0.477179	0.0369981	0.160575	0.334011	0.291033
tca-mir-965-5p	704	16503	1382	2198	2349	813	2880	3512	3684	2296	2043	1529	1331	182	66	112	103	36	168	196	199	130	71	58	56	5	0.831773	1.73046	0.450544	0.437839	5.38027	4.99593	4.1733	3.62428	0.013701	0.0897143	0.293695	0.100352
tca-mir-970-3p	363	16503	1382	2198	2349	813	2880	3512	3684	2296	2043	1529	1331	182	47	66	70	29	74	101	101	61	48	33	32	4	2.98166	2.49407	2.53139	2.39977	1.20965	2.94662	2.26999	1.3124	0.554967	0.300932	0.585385	0.429715
tca-mir-970-5p	186	16503	1382	2198	2349	813	2880	3512	3684	2296	2043	1529	1331	182	25	27	22	13	44	57	63	41	21	15	14	0	2.17504	0.566392	0.0984168	1.11927	1.92583	3.01262	3.99191	3.05855	0.204573	0.180378	0.26811	0.0583074
tca-mir-980-3p	158	16503	1382	2198	2349	813	2880	3512	3684	2296	2043	1529	1331	182	12	25	21	4	31	47	48	27	17	13	12	2	0.245227	0.831124	0.236967	0.0484547	0.694561	2.34954	2.15911	0.98409	0.165394	0.214486	0.290511	0.596371
tca-mir-980-5p	147	16503	1382	2198	2349	813	2880	3512	3684	2296	2043	1529	1331	182	12	13	18	8	36	45	45	26	20	21	12	2	0.336219	0.0285411	0.148282	0.523171	1.94576	2.54621	2.1383	1.11064	0.561615	1.78024	0.390772	0.65538
tca-mir-981-3p	397	16503	1382	2198	2349	813	2880	3512	3684	2296	2043	1529	1331	182	25	63	69	15	114	128	132	87	43	32	33	5	0.0332028	1.23055	1.49396	0.081383	8.15284	7.01002	6.80695	5.36675	0.0931411	0.113246	0.417475	0.561427
tca-mir-981-5p	205	16503	1382	2198	2349	813	2880	3512	3684	2296	2043	1529	1331	182	20	25	22	9	50	56	60	42	26	19	17	2	0.707851	0.19562	0.039059	0.252831	2.35878	1.80942	2.11029	2.46231	0.402383	0.357921	0.410211	0.404128
tca-mir-989-3p	659	16503	1382	2198	2349	813	2880	3512	3684	2296	2043	1529	1331	182	66	97	106	34	136	166	179	113	71	64	62	5	1.25855	0.892124	1.11921	0.460666	1.87099	2.21635	2.91284	2.14116	0.050806	0.503507	1.05361	0.131307
tca-mir-989-5p	249	16503	1382	2198	2349	813	2880	3512	3684	2296	2043	1529	1331	182	26	42	44	16	63	79	87	53	30	28	18	2	1.00217	1.36429	1.28185	0.961988	3.19579	4.40663	5.7804	3.29604	0.287594	0.928815	0.197759	0.28404
tca-mir-993-3p	285	16503	1382	2198	2349	813	2880	3512	3684	2296	2043	1529	1331	182	22	42	44	16	72	82	91	59	32	32	25	3	0.217792	0.67773	0.607044	0.616824	3.50896	2.9925	4.21764	3.24073	0.162897	0.970976	0.547311	0.414297
tca-mir-993-5p	273	16503	1382	2198	2349	813	2880	3512	3684	2296	2043	1529	1331	182	24	45	44	13	67	72	84	51	32	24	25	2	0.456479	1.2702	0.790706	0.320756	2.96111	1.75192	3.3678	1.97189	0.231675	0.25524	0.669591	0.234829
tca-mir-995-3p	360	16503	1382	2198	2349	813	2880	3512	3684	2296	2043	1529	1331	182	42	60	63	24	76	90	84	54	49	36	34	4	1.94314	1.56396	1.47441	1.27363	1.52696	1.42907	0.529442	0.610254	0.677196	0.55871	0.844796	0.43746
tca-mir-995-5p	378	16503	1382	2198	2349	813	2880	3512	3684	2296	2043	1529	1331	182	40	56	54	23	83	106	117	65	47	36	32	6	1.28219	0.763591	0.344801	0.912282	2.02038	3.18292	4.482	1.54061	0.348478	0.412154	0.465663	0.901639
tca-mir-998-3p	286	16503	1382	2198	2349	813	2880	3512	3684	2296	2043	1529	1331	182	37	44	44	20	60	72	74	44	36	30	25	2	2.51834	0.881964	0.59336	1.34982	1.29512	1.32657	1.18453	0.685182	0.383799	0.693413	0.537989	0.211885
tca-mir-998-5p	744	16503	1382	2198	2349	813	2880	3512	3684	2296	2043	1529	1331	182	70	108	110	38	177	224	237	145	82	70	55	6	0.872243	0.825052	0.512061	0.436077	5.53971	8.55332	9.50313	5.17475	0.0636491	0.3834	0.137265	0.143676
tca-mir-9a-3p	886	16503	1382	2198	2349	813	2880	3512	3684	2296	2043	1529	1331	182	108	143	150	60	195	247	264	158	100	86	72	6	4.59921	2.24875	2.04436	2.3008	3.83058	6.15711	7.38193	3.48585	0.0798589	0.528711	0.355286	0.0638513
tca-mir-9a-5p	895	16503	1382	2198	2349	813	2880	3512	3684	2296	2043	1529	1331	182	104	164	157	64	218	274	291	189	90	70	58	6	3.63948	5.25374	2.71345	2.97477	7.51291	11.1907	12.7113	9.27943	0.00668121	0.0305768	0.0172925	0.0605062
tca-mir-9b-3p	987	16503	1382	2198	2349	813	2880	3512	3684	2296	2043	1529	1331	182	123	166	168	71	205	263	294	174	116	96	71	8	5.61773	3.29828	2.30446	3.29382	2.62135	4.84263	8.13512	3.51189	0.14752	0.55206	0.0780019	0.115071
tca-mir-9b-5p	1503	16503	1382	2198	2349	813	2880	3512	3684	2296	2043	1529	1331	182	158	254	253	99	354	418	440	287	178	148	119	12	3.00954	4.87427	2.87773	2.95725	9.95006	9.92505	10.7712	8.70914	0.136004	0.713656	0.249116	0.0675666
tca-mir-9c-3p	121	16503	1382	2198	2349	813	2880	3512	3684	2296	2043	1529	1331	182	12	17	15	5	32	36	40	28	10	11	16	1	0.672952	0.462427	0.177522	0.257657	2.33702	1.98663	2.63787	2.6937	0.0472056	0.349622	1.76493	0.41297
tca-mir-9c-5p	724	16503	1382	2198	2349	813	2880	3512	3684	2296	2043	1529	1331	182	93	141	130	57	187	224	237	161	74	74	44	2	4.94589	6.07674	2.7326	3.75163	8.55139	9.72507	10.7875	9.71148	0.0167797	0.782499	0.0101131	0.00532723
tca-mir-9d-3p	976	16503	1382	2198	2349	813	2880	3512	3684	2296	2043	1529	1331	182	107	157	168	64	200	255	279	164	109	96	80	7	2.81609	2.34837	2.5024	2.10008	2.30444	4.08696	6.00333	2.43167	0.0592405	0.615358	0.388374	0.0704232
tca-mir-9d-5p	839	16503	1382	2198	2349	813	2880	3512	3684	2296	2043	1529	1331	182	102	156	147	63	217	266	281	183	88	77	52	6	4.33796	5.39854	2.56345	3.48943	9.87315	12.7565	14.0355	10.2011	0.0208448	0.296353	0.00935792	0.0841668
tca-mir-9e-3p	975	16503	1382	2198	2349	813	2880	3512	3684	2296	2043	1529	1331	182	129	171	172	70	213	257	285	173	115	92	76	5	7.31922	4.32791	3.02124	3.23398	3.92076	4.39241	7.05756	3.63831	0.15733	0.400506	0.22422	0.0169868
tca-mir-9e-5p	1032	16503	1382	2198	2349	813	2880	3512	3684	2296	2043	1529	1331	182	122	189	194	76	261	313	325	221	114	96	71	8	4.48106	5.93608	4.92936	3.78906	10.6448	12.1561	12.1156	11.3807	0.044057	0.341298	0.0365771	0.0913804
tca-mir-iab-4-3p	192	16503	1382	2198	2349	813	2880	3512	3684	2296	2043	1529	1331	182	23	35	35	13	48	60	63	40	16	15	12	3	1.50714	1.69108	1.31347	1.03319	2.52201	3.36965	3.54849	2.51973	0.0218802	0.14942	0.10619	0.788543
tca-mir-iab-4-5p	317	16503	1382	2198	2349	813	2880	3512	3684	2296	2043	1529	1331	182	32	48	43	15	87	114	129	74	27	26	20	2	0.944991	0.83099	0.224022	0.303679	5.54273	9.34002	13.376	5.74592	0.00786633	0.150809	0.0678181	0.165819
tca-mir-iab-8-3p	347	16503	1382	2198	2349	813	2880	3512	3684	2296	2043	1529	1331	182	36	49	61	20	79	93	98	62	41	40	28	3	1.11915	0.529663	1.48351	0.71295	2.36498	2.26084	2.42827	1.82071	0.230973	1.20251	0.347984	0.271895
tca-mir-iab-8-5p	810	16503	1382	2198	2349	813	2880	3512	3684	2296	2043	1529	1331	182	90	137	134	53	189	224	249	161	95	79	70	8	2.64647	2.9398	1.59281	1.83869	5.28877	5.37981	8.31395	6.20167	0.157319	0.543045	0.612469	0.268194

## Sheet: Cuffdiff-canonical targets
Supplementary Table 3c. MicroRNA target enrichment in down-, up- and not- regulated protein-coding genes between oocytes and 8-16 h, 16-24 h and 24-48h intervals. Data is obained using the canonical sites prediction method, and differential expression is estimated by the cuffdiff algorithm. Shading of columns showing targets enrichment p-values reflects increasingly significant estimates.
	number of targets in all genes	number of all genes	numbers of down-regulated genes (fold difference >2; p<0.05) between oocytes and				numbers of up-regulated genes (fold difference >2; p<0.05) between oocytes and				numbers of notregulated genes (fold difference <2; p>0.05) between oocytes and				numbers of microRNA targets within down-regulated genes (fold difference >2; p<0.05) between oocytes and				numbers of microRNA targets within up-regulated genes (fold difference >2; p<0.05) between oocytes and				numbers of microRNA targets within notregulated genes (fold difference <2; p>0.05) between oocytes and				-LOG10 p-value of microRNA target enrichment within down-regulated genes (fold difference >2; p<0.05) between oocytes and				-LOG10 p-value of microRNA target enrichment within up-regulated genes (fold difference >2; p<0.05) between oocytes and				-LOG10 p-value of microRNA target enrichment within notregulated genes (fold difference <2; p>0.05) between oocytes and
			8-16 h	16-24 h	24-48 h	all	8-16 h	16-24 h	24-48 h	all	8-16 h	16-24 h	24-48 h	all	8-16 h	16-24 h	24-48 h	all	8-16 h	16-24 h	24-48 h	all	8-16 h	16-24 h	24-48 h	all	8-16 h	16-24 h	24-48 h	all	8-16 h	16-24 h	24-48 h	all	8-16 h	16-24 h	24-48 h	all
tca-mir-3851m-1-3p	277	16503	1908	3281	3028	1269	2168	2375	2604	1440	6335	5075	4865	2564	75	92	75	46	47	57	67	36	76	48	58	20	12.5968	7.31944	3.93698	6.67655	1.58006	2.74096	4.03546	2.21672	3.19912e-05	9.00998e-08	0.000334031	8.88737e-06
tca-mir-3851m-1-5p	314	16503	1908	3281	3028	1269	2168	2375	2604	1440	6335	5075	4865	2564	46	82	74	30	74	67	77	49	98	66	67	27	1.41888	2.5658	2.10817	1.04399	6.89953	3.53317	4.72588	4.65383	0.00196353	2.75674e-05	0.000279486	7.62284e-05
tca-mir-11617c-3p	790	16503	1908	3281	3028	1269	2168	2375	2604	1440	6335	5075	4865	2564	149	228	193	95	145	142	175	96	254	195	180	79	9.50833	9.66905	5.30459	5.37099	5.08168	2.74764	6.25161	3.47535	4.80343e-05	2.93794e-05	3.9847e-06	1.01687e-06
tca-mir-11617c-5p	314	16503	1908	3281	3028	1269	2168	2375	2604	1440	6335	5075	4865	2564	46	82	74	30	74	67	77	49	98	66	67	27	1.41888	2.5658	2.10817	1.04399	6.89953	3.53317	4.72588	4.65383	0.00196353	2.75674e-05	0.000279486	7.62284e-05
tca-mir-11617e-5p	314	16503	1908	3281	3028	1269	2168	2375	2604	1440	6335	5075	4865	2564	46	82	74	30	74	67	77	49	98	66	67	27	1.41888	2.5658	2.10817	1.04399	6.89953	3.53317	4.72588	4.65383	0.00196353	2.75674e-05	0.000279486	7.62284e-05
tca-mir-11617f-1-5p	695	16503	1908	3281	3028	1269	2168	2375	2604	1440	6335	5075	4865	2564	105	164	146	68	157	158	184	101	192	159	145	63	2.79161	2.22096	1.51928	1.77773	12.0049	9.18969	13.2479	6.99884	3.21308e-10	6.54323e-07	4.20771e-08	8.92449e-08
tca-mir-3836i-1-3p	231	16503	1908	3281	3028	1269	2168	2375	2604	1440	6335	5075	4865	2564	64	73	50	32	45	43	57	27	60	50	47	14	11.3982	5.12149	1.07274	3.39414	2.62337	1.52655	3.81232	1.32601	1.80912e-05	0.000526125	0.000438646	3.22345e-06
tca-mir-3836i-1-5p	166	16503	1908	3281	3028	1269	2168	2375	2604	1440	6335	5075	4865	2564	26	39	35	17	39	35	40	23	52	34	32	15	1.37628	0.983515	0.810322	1.05863	4.07533	2.15992	2.73161	2.01672	0.0153179	0.00084167	0.000781996	0.00425805
tca-mir-11617f-2-5p	695	16503	1908	3281	3028	1269	2168	2375	2604	1440	6335	5075	4865	2564	105	164	146	68	157	158	184	101	192	159	145	63	2.79161	2.22096	1.51928	1.77773	12.0049	9.18969	13.2479	6.99884	3.21308e-10	6.54323e-07	4.20771e-08	8.92449e-08
tca-mir-3836i-2-3p	231	16503	1908	3281	3028	1269	2168	2375	2604	1440	6335	5075	4865	2564	64	73	50	32	45	43	57	27	60	50	47	14	11.3982	5.12149	1.07274	3.39414	2.62337	1.52655	3.81232	1.32601	1.80912e-05	0.000526125	0.000438646	3.22345e-06
tca-mir-3836i-2-5p	166	16503	1908	3281	3028	1269	2168	2375	2604	1440	6335	5075	4865	2564	26	39	35	17	39	35	40	23	52	34	32	15	1.37628	0.983515	0.810322	1.05863	4.07533	2.15992	2.73161	2.01672	0.0153179	0.00084167	0.000781996	0.00425805
tca-mir-11641-5p	1123	16503	1908	3281	3028	1269	2168	2375	2604	1440	6335	5075	4865	2564	204	294	262	137	203	216	252	134	336	264	246	96	11.2184	7.34691	5.23418	7.83676	6.34605	5.79779	9.29322	4.19548	2.23975e-10	6.62581e-09	8.74641e-10	2.29317e-13
tca-mir-276b-3p	332	16503	1908	3281	3028	1269	2168	2375	2604	1440	6335	5075	4865	2564	59	81	74	36	72	86	90	53	90	68	76	30	3.54908	1.75783	1.55151	1.83956	5.30192	8.04664	7.44293	5.2497	3.61162e-06	6.37523e-06	0.00174198	0.000133164
tca-mir-276b-5p	101	16503	1908	3281	3028	1269	2168	2375	2604	1440	6335	5075	4865	2564	12	17	14	8	17	17	28	9	35	32	22	15	0.415075	0.133281	0.0697887	0.427893	0.964714	0.706128	3.15337	0.412734	0.126393	0.428209	0.0235003	0.2937
tca-mir-3851g-3-3p	277	16503	1908	3281	3028	1269	2168	2375	2604	1440	6335	5075	4865	2564	75	92	75	46	47	57	67	36	76	48	58	20	12.5968	7.31944	3.93698	6.67655	1.58006	2.74096	4.03546	2.21672	3.19912e-05	9.00998e-08	0.000334031	8.88737e-06
tca-mir-11642-3p	332	16503	1908	3281	3028	1269	2168	2375	2604	1440	6335	5075	4865	2564	47	78	67	31	80	78	92	58	103	65	74	26	1.21991	1.36146	0.763595	0.961148	7.83466	5.54259	8.09509	7.00392	0.0012468	1.05517e-06	0.000790402	7.39981e-06
tca-mir-11642-5p	492	16503	1908	3281	3028	1269	2168	2375	2604	1440	6335	5075	4865	2564	72	119	104	46	87	87	102	60	164	121	116	49	1.82889	2.12981	1.31707	1.14579	2.84459	1.77844	2.8981	2.49062	0.00456449	0.000570283	0.000766102	7.50026e-05
tca-mir-3836c-1-3p	149	16503	1908	3281	3028	1269	2168	2375	2604	1440	6335	5075	4865	2564	24	35	24	14	25	29	38	18	53	42	42	24	1.44975	0.941856	0.141382	0.764838	1.10667	1.47376	3.13175	1.2211	0.135	0.142313	0.224033	0.430913
tca-mir-3836c-1-5p	212	16503	1908	3281	3028	1269	2168	2375	2604	1440	6335	5075	4865	2564	32	57	53	22	43	42	40	23	68	61	60	31	1.33437	2.29634	2.22903	1.22799	2.90018	1.93974	1.03133	0.947975	0.0143385	0.150148	0.210862	0.221594
tca-mir-11624b-2-3p	241	16503	1908	3281	3028	1269	2168	2375	2604	1440	6335	5075	4865	2564	33	54	57	24	47	50	56	34	73	57	55	25	0.894122	0.846135	1.82127	1.11147	2.71327	2.58092	3.05889	2.71678	0.00221235	0.00375935	0.0052713	0.00570005
tca-mir-11643-3p	381	16503	1908	3281	3028	1269	2168	2375	2604	1440	6335	5075	4865	2564	55	94	80	37	97	89	91	58	109	79	93	34	1.45746	2.06391	1.09786	1.22731	10.7205	6.07785	4.92333	4.99538	1.43794e-05	2.63058e-06	0.00658557	3.6861e-05
tca-mir-11643-5p	141	16503	1908	3281	3028	1269	2168	2375	2604	1440	6335	5075	4865	2564	20	31	29	12	28	31	33	21	43	38	32	15	0.871157	0.641476	0.674876	0.539958	2.05264	2.28128	2.19306	2.27523	0.0136427	0.0899999	0.0194458	0.0279615
tca-mir-6016b-3p	170	16503	1908	3281	3028	1269	2168	2375	2604	1440	6335	5075	4865	2564	23	36	33	12	37	47	47	28	51	32	32	12	0.755509	0.528521	0.49878	0.259548	3.20751	5.70133	4.59884	3.45548	0.00594464	0.000126271	0.000432575	0.000283545
tca-mir-6016b-5p	168	16503	1908	3281	3028	1269	2168	2375	2604	1440	6335	5075	4865	2564	16	32	27	12	38	40	39	26	52	47	48	24	0.121463	0.250213	0.128682	0.273701	3.62654	3.42363	2.37667	2.85504	0.0117655	0.12138	0.248081	0.203467
tca-mir-11644-3p	107	16503	1908	3281	3028	1269	2168	2375	2604	1440	6335	5075	4865	2564	8	17	15	5	25	23	23	18	40	36	30	19	0.0536963	0.0864612	0.0703208	0.0755481	2.91936	1.78601	1.35901	2.66802	0.265569	0.651185	0.234808	0.663673
tca-mir-11644-5p	370	16503	1908	3281	3028	1269	2168	2375	2604	1440	6335	5075	4865	2564	47	82	67	27	80	82	100	56	117	79	82	33	0.664874	0.919657	0.287711	0.248521	5.73293	4.74775	8.08784	4.7799	0.00159728	1.21862e-05	0.000368653	4.59804e-05
tca-mir-307b-3p	237	16503	1908	3281	3028	1269	2168	2375	2604	1440	6335	5075	4865	2564	30	48	41	17	56	58	69	34	78	54	47	15	0.588273	0.393018	0.203772	0.253718	5.50197	4.92249	7.23001	2.84311	0.0202656	0.00166403	0.000195966	4.74678e-06
tca-mir-307b-5p	508	16503	1908	3281	3028	1269	2168	2375	2604	1440	6335	5075	4865	2564	66	113	95	42	116	108	131	75	150	122	107	40	0.861967	1.09453	0.40813	0.559842	9.37373	5.09388	8.85224	5.67242	6.01486e-06	0.000169236	3.67347e-06	5.18758e-08
tca-mir-927c-3p	543	16503	1908	3281	3028	1269	2168	2375	2604	1440	6335	5075	4865	2564	98	153	137	63	94	97	117	65	193	132	130	58	5.6251	6.05073	4.69839	3.40249	2.71529	2.02442	3.90246	2.44141	0.0407489	0.000192989	0.00086777	0.000252283
tca-mir-927c-5p	508	16503	1908	3281	3028	1269	2168	2375	2604	1440	6335	5075	4865	2564	58	113	95	40	105	104	124	71	150	110	104	39	0.29559	1.09453	0.40813	0.402472	6.22077	4.22482	6.94012	4.5865	6.01486e-06	9.1326e-07	8.32279e-07	2.3103e-08
tca-mir-11645-5p	134	16503	1908	3281	3028	1269	2168	2375	2604	1440	6335	5075	4865	2564	15	27	21	9	31	32	32	22	31	33	27	10	0.313871	0.378965	0.124064	0.231767	3.31197	2.94544	2.29119	2.90071	5.22688e-05	0.0322749	0.00409905	0.00171821
tca-mir-11646-3p	158	16503	1908	3281	3028	1269	2168	2375	2604	1440	6335	5075	4865	2564	17	28	25	9	34	35	42	21	47	36	29	13	0.24875	0.145298	0.11847	0.106647	2.92902	2.52519	3.78979	1.71723	0.00623572	0.00711923	0.000400544	0.00204187
tca-mir-11646-5p	654	16503	1908	3281	3028	1269	2168	2375	2604	1440	6335	5075	4865	2564	85	137	117	50	130	132	159	91	200	152	157	62	0.95891	0.645597	0.223346	0.319065	6.48629	4.8243	8.53429	5.55947	5.66359e-06	3.64076e-06	0.000364716	1.1123e-06
tca-mir-11647-3p	937	16503	1908	3281	3028	1269	2168	2375	2604	1440	6335	5075	4865	2564	134	222	207	91	193	197	205	126	286	228	214	104	2.43681	2.86295	2.91078	2.06866	10.6645	8.25116	6.77754	6.56235	6.18209e-08	2.01775e-06	7.0168e-07	1.60846e-05
tca-mir-11648-3p	80	16503	1908	3281	3028	1269	2168	2375	2604	1440	6335	5075	4865	2564	12	19	14	6	16	20	22	11	25	16	21	6	0.889282	0.806338	0.293769	0.377815	1.53707	2.42038	2.6287	1.35604	0.0525912	0.00943579	0.160388	0.0113406
tca-mir-11648-5p	541	16503	1908	3281	3028	1269	2168	2375	2604	1440	6335	5075	4865	2564	86	151	133	58	90	96	121	60	171	120	112	42	3.0714	5.72307	4.02461	2.3961	2.13932	1.9327	4.76567	1.64576	0.000218725	1.7171e-06	7.2717e-07	1.23584e-08
tca-mir-3851n-1-3p	277	16503	1908	3281	3028	1269	2168	2375	2604	1440	6335	5075	4865	2564	75	92	75	46	47	57	67	36	76	48	58	20	12.5968	7.31944	3.93698	6.67655	1.58006	2.74096	4.03546	2.21672	3.19912e-05	9.00998e-08	0.000334031	8.88737e-06
tca-mir-3851n-1-5p	314	16503	1908	3281	3028	1269	2168	2375	2604	1440	6335	5075	4865	2564	46	82	74	30	74	67	77	49	98	66	67	27	1.41888	2.5658	2.10817	1.04399	6.89953	3.53317	4.72588	4.65383	0.00196353	2.75674e-05	0.000279486	7.62284e-05
tca-mir-3851p-3p	277	16503	1908	3281	3028	1269	2168	2375	2604	1440	6335	5075	4865	2564	75	92	75	46	47	57	67	36	76	48	58	20	12.5968	7.31944	3.93698	6.67655	1.58006	2.74096	4.03546	2.21672	3.19912e-05	9.00998e-08	0.000334031	8.88737e-06
tca-mir-3851p-5p	212	16503	1908	3281	3028	1269	2168	2375	2604	1440	6335	5075	4865	2564	34	50	39	23	48	47	55	35	61	49	44	22	1.72359	1.11731	0.346772	1.44016	4.3411	3.10382	4.34107	4.09761	0.00088278	0.0035648	0.00108607	0.00847663
tca-mir-11617d-2-5p	695	16503	1908	3281	3028	1269	2168	2375	2604	1440	6335	5075	4865	2564	105	164	146	68	157	158	184	101	192	159	145	63	2.79161	2.22096	1.51928	1.77773	12.0049	9.18969	13.2479	6.99884	3.21308e-10	6.54323e-07	4.20771e-08	8.92449e-08
tca-mir-3836j-3p	231	16503	1908	3281	3028	1269	2168	2375	2604	1440	6335	5075	4865	2564	64	73	50	32	45	43	57	27	60	50	47	14	11.3982	5.12149	1.07274	3.39414	2.62337	1.52655	3.81232	1.32601	1.80912e-05	0.000526125	0.000438646	3.22345e-06
tca-mir-11617d-3-5p	695	16503	1908	3281	3028	1269	2168	2375	2604	1440	6335	5075	4865	2564	105	164	146	68	157	158	184	101	192	159	145	63	2.79161	2.22096	1.51928	1.77773	12.0049	9.18969	13.2479	6.99884	3.21308e-10	6.54323e-07	4.20771e-08	8.92449e-08
tca-mir-3851l-4-3p	277	16503	1908	3281	3028	1269	2168	2375	2604	1440	6335	5075	4865	2564	75	92	75	46	47	57	67	36	76	48	58	20	12.5968	7.31944	3.93698	6.67655	1.58006	2.74096	4.03546	2.21672	3.19912e-05	9.00998e-08	0.000334031	8.88737e-06
tca-mir-3851l-4-5p	314	16503	1908	3281	3028	1269	2168	2375	2604	1440	6335	5075	4865	2564	46	82	74	30	74	67	77	49	98	66	67	27	1.41888	2.5658	2.10817	1.04399	6.89953	3.53317	4.72588	4.65383	0.00196353	2.75674e-05	0.000279486	7.62284e-05
tca-mir-11649-3p	293	16503	1908	3281	3028	1269	2168	2375	2604	1440	6335	5075	4865	2564	35	67	56	29	58	55	69	36	92	72	64	30	0.426621	1.05678	0.476748	1.1812	3.32118	1.82647	3.75169	1.84202	0.0031377	0.00486876	0.000814756	0.00233101
tca-mir-11650-3p	150	16503	1908	3281	3028	1269	2168	2375	2604	1440	6335	5075	4865	2564	18	31	31	12	26	37	44	16	44	37	29	8	0.429308	0.445552	0.703786	0.433653	1.26799	3.56092	5.08176	0.795809	0.00552321	0.0270812	0.00134052	3.98566e-05
tca-mir-11617a-1-3p	501	16503	1908	3281	3028	1269	2168	2375	2604	1440	6335	5075	4865	2564	93	139	116	60	103	102	104	68	144	110	112	37	5.92127	5.18591	2.60035	3.64349	6.00479	4.06134	2.95964	4.02847	1.20518e-06	2.26469e-06	7.2924e-05	8.33577e-09
tca-mir-11617a-1-5p	273	16503	1908	3281	3028	1269	2168	2375	2604	1440	6335	5075	4865	2564	28	52	51	20	52	45	54	28	96	72	65	30	0.145551	0.220655	0.391313	0.273665	2.67839	0.851976	1.5117	0.807805	0.0699701	0.0284701	0.00917816	0.00835182
tca-mir-3836d-3p	231	16503	1908	3281	3028	1269	2168	2375	2604	1440	6335	5075	4865	2564	64	73	50	32	45	43	57	27	60	50	47	14	11.3982	5.12149	1.07274	3.39414	2.62337	1.52655	3.81232	1.32601	1.80912e-05	0.000526125	0.000438646	3.22345e-06
tca-mir-3836d-5p	252	16503	1908	3281	3028	1269	2168	2375	2604	1440	6335	5075	4865	2564	30	51	50	21	47	49	61	35	86	60	61	28	0.415114	0.391209	0.62054	0.525609	2.31559	1.98086	3.7644	2.65271	0.0409932	0.00375171	0.0157838	0.0119815
tca-mir-3836c-2-3p	213	16503	1908	3281	3028	1269	2168	2375	2604	1440	6335	5075	4865	2564	34	50	50	23	45	46	48	30	63	47	48	20	1.6951	1.08811	1.62729	1.41972	3.39467	2.8042	2.4555	2.48685	0.00186868	0.00125389	0.00600599	0.00253404
tca-mir-3836c-2-5p	212	16503	1908	3281	3028	1269	2168	2375	2604	1440	6335	5075	4865	2564	32	57	53	22	43	42	40	23	68	61	60	31	1.33437	2.29634	2.22903	1.22799	2.90018	1.93974	1.03133	0.947975	0.0143385	0.150148	0.210862	0.221594
tca-mir-11618a-1-3p	160	16503	1908	3281	3028	1269	2168	2375	2604	1440	6335	5075	4865	2564	23	36	31	16	33	33	44	24	51	37	23	12	0.960485	0.758161	0.489561	0.964031	2.54595	1.9363	4.30702	2.51742	0.0228793	0.00876982	2.46272e-06	0.000759929
tca-mir-11618a-1-5p	212	16503	1908	3281	3028	1269	2168	2375	2604	1440	6335	5075	4865	2564	34	50	39	23	48	47	55	35	61	49	44	22	1.72359	1.11731	0.346772	1.44016	4.3411	3.10382	4.34107	4.09761	0.00088278	0.0035648	0.00108607	0.00847663
tca-mir-3851o-2-3p	277	16503	1908	3281	3028	1269	2168	2375	2604	1440	6335	5075	4865	2564	75	92	75	46	47	57	67	36	76	48	58	20	12.5968	7.31944	3.93698	6.67655	1.58006	2.74096	4.03546	2.21672	3.19912e-05	9.00998e-08	0.000334031	8.88737e-06
tca-mir-3851o-2-5p	239	16503	1908	3281	3028	1269	2168	2375	2604	1440	6335	5075	4865	2564	32	62	56	21	48	46	53	29	73	53	57	21	0.795092	2.0603	1.72264	0.660933	3.03781	1.82733	2.46907	1.56165	0.00290332	0.000817415	0.013325	0.000610969
tca-mir-3851k-1-3p	277	16503	1908	3281	3028	1269	2168	2375	2604	1440	6335	5075	4865	2564	75	92	75	46	47	57	67	36	76	48	58	20	12.5968	7.31944	3.93698	6.67655	1.58006	2.74096	4.03546	2.21672	3.19912e-05	9.00998e-08	0.000334031	8.88737e-06
tca-mir-3851k-1-5p	314	16503	1908	3281	3028	1269	2168	2375	2604	1440	6335	5075	4865	2564	46	82	74	30	74	67	77	49	98	66	67	27	1.41888	2.5658	2.10817	1.04399	6.89953	3.53317	4.72588	4.65383	0.00196353	2.75674e-05	0.000279486	7.62284e-05
tca-mir-11618b-1-3p	574	16503	1908	3281	3028	1269	2168	2375	2604	1440	6335	5075	4865	2564	114	168	139	73	119	113	135	74	160	124	122	46	8.7701	7.78483	3.84831	5.14566	7.01105	3.78322	6.47276	3.59478	2.06849e-08	1.72994e-07	1.62093e-06	1.4475e-08
tca-mir-11618b-1-5p	212	16503	1908	3281	3028	1269	2168	2375	2604	1440	6335	5075	4865	2564	34	50	39	23	48	47	55	35	61	49	44	22	1.72359	1.11731	0.346772	1.44016	4.3411	3.10382	4.34107	4.09761	0.00088278	0.0035648	0.00108607	0.00847663
tca-mir-11614-3p	198	16503	1908	3281	3028	1269	2168	2375	2604	1440	6335	5075	4865	2564	25	48	44	18	42	45	48	34	64	52	46	27	0.562654	1.2706	1.16509	0.727739	3.26676	3.2529	3.16682	4.3675	0.0196442	0.0436239	0.0129238	0.133197
tca-mir-11614-5p	211	16503	1908	3281	3028	1269	2168	2375	2604	1440	6335	5075	4865	2564	22	42	43	12	48	33	41	23	56	56	47	17	0.186523	0.34175	0.711247	0.0790989	4.3971	0.579288	1.20353	0.964686	7.7286e-05	0.0471448	0.00491782	0.000374396
tca-mir-3836e-3p	231	16503	1908	3281	3028	1269	2168	2375	2604	1440	6335	5075	4865	2564	64	73	50	32	45	43	57	27	60	50	47	14	11.3982	5.12149	1.07274	3.39414	2.62337	1.52655	3.81232	1.32601	1.80912e-05	0.000526125	0.000438646	3.22345e-06
tca-mir-3836e-5p	250	16503	1908	3281	3028	1269	2168	2375	2604	1440	6335	5075	4865	2564	39	62	52	24	57	54	54	34	73	52	56	26	1.68382	1.64309	0.859879	0.973546	5.07076	3.14522	2.24967	2.44969	0.000602885	0.000109904	0.00306418	0.00522695
tca-mir-11619e-3p	243	16503	1908	3281	3028	1269	2168	2375	2604	1440	6335	5075	4865	2564	30	54	44	14	51	57	60	34	84	58	53	25	0.513281	0.801162	0.301996	0.0727921	3.65182	4.28301	3.97353	2.65541	0.0561282	0.00450136	0.0018419	0.00498319
tca-mir-11619e-5p	2137	16503	1908	3281	3028	1269	2168	2375	2604	1440	6335	5075	4865	2564	351	551	491	235	369	392	456	255	665	507	499	205	12.669	12.3847	8.50695	8.7633	8.72799	7.61101	12.9297	7.59252	1.74543e-14	3.61623e-15	2.95899e-12	0
tca-mir-3836c-3-3p	231	16503	1908	3281	3028	1269	2168	2375	2604	1440	6335	5075	4865	2564	64	73	50	32	45	43	57	27	60	50	47	14	11.3982	5.12149	1.07274	3.39414	2.62337	1.52655	3.81232	1.32601	1.80912e-05	0.000526125	0.000438646	3.22345e-06
tca-mir-3836c-3-5p	212	16503	1908	3281	3028	1269	2168	2375	2604	1440	6335	5075	4865	2564	32	57	53	22	43	42	40	23	68	61	60	31	1.33437	2.29634	2.22903	1.22799	2.90018	1.93974	1.03133	0.947975	0.0143385	0.150148	0.210862	0.221594
tca-mir-11618a-4-3p	160	16503	1908	3281	3028	1269	2168	2375	2604	1440	6335	5075	4865	2564	23	36	31	16	33	33	44	24	51	37	23	12	0.960485	0.758161	0.489561	0.964031	2.54595	1.9363	4.30702	2.51742	0.0228793	0.00876982	2.46272e-06	0.000759929
tca-mir-11618a-4-5p	212	16503	1908	3281	3028	1269	2168	2375	2604	1440	6335	5075	4865	2564	34	50	39	23	48	47	55	35	61	49	44	22	1.72359	1.11731	0.346772	1.44016	4.3411	3.10382	4.34107	4.09761	0.00088278	0.0035648	0.00108607	0.00847663
tca-mir-3851o-1-3p	277	16503	1908	3281	3028	1269	2168	2375	2604	1440	6335	5075	4865	2564	75	92	75	46	47	57	67	36	76	48	58	20	12.5968	7.31944	3.93698	6.67655	1.58006	2.74096	4.03546	2.21672	3.19912e-05	9.00998e-08	0.000334031	8.88737e-06
tca-mir-3851o-1-5p	239	16503	1908	3281	3028	1269	2168	2375	2604	1440	6335	5075	4865	2564	32	62	56	21	48	46	53	29	73	53	57	21	0.795092	2.0603	1.72264	0.660933	3.03781	1.82733	2.46907	1.56165	0.00290332	0.000817415	0.013325	0.000610969
tca-mir-3851l-2-3p	277	16503	1908	3281	3028	1269	2168	2375	2604	1440	6335	5075	4865	2564	75	92	75	46	47	57	67	36	76	48	58	20	12.5968	7.31944	3.93698	6.67655	1.58006	2.74096	4.03546	2.21672	3.19912e-05	9.00998e-08	0.000334031	8.88737e-06
tca-mir-3851l-2-5p	314	16503	1908	3281	3028	1269	2168	2375	2604	1440	6335	5075	4865	2564	46	82	74	30	74	67	77	49	98	66	67	27	1.41888	2.5658	2.10817	1.04399	6.89953	3.53317	4.72588	4.65383	0.00196353	2.75674e-05	0.000279486	7.62284e-05
tca-mir-11618b-2-3p	574	16503	1908	3281	3028	1269	2168	2375	2604	1440	6335	5075	4865	2564	114	168	139	73	119	113	135	74	160	124	122	46	8.7701	7.78483	3.84831	5.14566	7.01105	3.78322	6.47276	3.59478	2.06849e-08	1.72994e-07	1.62093e-06	1.4475e-08
tca-mir-11618b-2-5p	212	16503	1908	3281	3028	1269	2168	2375	2604	1440	6335	5075	4865	2564	34	50	39	23	48	47	55	35	61	49	44	22	1.72359	1.11731	0.346772	1.44016	4.3411	3.10382	4.34107	4.09761	0.00088278	0.0035648	0.00108607	0.00847663
tca-mir-3836f-3p	231	16503	1908	3281	3028	1269	2168	2375	2604	1440	6335	5075	4865	2564	64	73	50	32	45	43	57	27	60	50	47	14	11.3982	5.12149	1.07274	3.39414	2.62337	1.52655	3.81232	1.32601	1.80912e-05	0.000526125	0.000438646	3.22345e-06
tca-mir-3836f-5p	166	16503	1908	3281	3028	1269	2168	2375	2604	1440	6335	5075	4865	2564	26	39	35	17	39	35	40	23	52	34	32	15	1.37628	0.983515	0.810322	1.05863	4.07533	2.15992	2.73161	2.01672	0.0153179	0.00084167	0.000781996	0.00425805
tca-mir-11619f-3p	191	16503	1908	3281	3028	1269	2168	2375	2604	1440	6335	5075	4865	2564	26	41	36	17	44	47	48	28	67	52	44	25	0.803764	0.590563	0.414116	0.664744	4.25003	4.23618	3.55111	2.63528	0.0927586	0.0771299	0.012195	0.0983496
tca-mir-11619f-5p	250	16503	1908	3281	3028	1269	2168	2375	2604	1440	6335	5075	4865	2564	34	61	55	25	53	54	65	30	76	54	48	21	0.875048	1.4915	1.22886	1.14783	3.87758	3.14522	4.98999	1.53197	0.00212479	0.000319306	5.58393e-05	0.000241502
tca-mir-11620-3p	90	16503	1908	3281	3028	1269	2168	2375	2604	1440	6335	5075	4865	2564	10	22	18	7	18	19	18	12	27	24	23	11	0.327273	0.946242	0.542216	0.41025	1.63195	1.53273	0.962921	1.3167	0.0273769	0.116697	0.12131	0.11884
tca-mir-11620-5p	238	16503	1908	3281	3028	1269	2168	2375	2604	1440	6335	5075	4865	2564	34	50	39	18	55	54	65	41	72	56	45	22	1.09568	0.526801	0.121327	0.330531	5.11107	3.70356	5.77255	5.09392	0.00224164	0.0034907	5.27402e-05	0.00127633
tca-mir-11615-3p	167	16503	1908	3281	3028	1269	2168	2375	2604	1440	6335	5075	4865	2564	24	44	34	14	32	34	37	19	50	36	35	13	0.974823	1.79026	0.664329	0.518101	1.99354	1.88593	1.95441	1.03982	0.00601873	0.00220018	0.00353452	0.000896013
tca-mir-11615-5p	278	16503	1908	3281	3028	1269	2168	2375	2604	1440	6335	5075	4865	2564	35	62	65	27	56	64	81	44	82	63	53	20	0.58827	0.862907	1.86498	1.0658	3.43388	4.42468	8.32348	4.4284	0.000482845	0.000683232	1.91365e-05	8.0547e-06
tca-mir-3851k-2-3p	277	16503	1908	3281	3028	1269	2168	2375	2604	1440	6335	5075	4865	2564	75	92	75	46	47	57	67	36	76	48	58	20	12.5968	7.31944	3.93698	6.67655	1.58006	2.74096	4.03546	2.21672	3.19912e-05	9.00998e-08	0.000334031	8.88737e-06
tca-mir-3851k-2-5p	314	16503	1908	3281	3028	1269	2168	2375	2604	1440	6335	5075	4865	2564	46	82	74	30	74	67	77	49	98	66	67	27	1.41888	2.5658	2.10817	1.04399	6.89953	3.53317	4.72588	4.65383	0.00196353	2.75674e-05	0.000279486	7.62284e-05
tca-mir-11619b-3p	159	16503	1908	3281	3028	1269	2168	2375	2604	1440	6335	5075	4865	2564	22	35	31	16	35	37	43	30	42	38	28	14	0.816901	0.664706	0.508315	0.98238	3.17911	3.03377	4.04505	4.78688	0.000411791	0.0150793	0.000173163	0.00386014
tca-mir-11621-3p	605	16503	1908	3281	3028	1269	2168	2375	2604	1440	6335	5075	4865	2564	87	148	140	60	125	128	140	84	187	136	137	54	1.87532	2.6785	2.97523	1.75573	7.23443	5.76735	6.24888	5.15829	2.45579e-05	1.07071e-06	3.18627e-05	3.22069e-07
tca-mir-11621-5p	665	16503	1908	3281	3028	1269	2168	2375	2604	1440	6335	5075	4865	2564	135	192	164	93	127	126	150	88	199	156	150	61	10.9383	8.26979	4.86043	8.31892	5.40948	3.4007	5.93844	4.5435	8.74732e-07	5.49646e-06	1.12966e-05	2.60681e-07
tca-mir-11619a-3-3p	212	16503	1908	3281	3028	1269	2168	2375	2604	1440	6335	5075	4865	2564	26	42	39	14	37	41	49	25	58	50	45	19	0.487229	0.328842	0.346772	0.174174	1.55608	1.74083	2.7304	1.31665	0.000195658	0.0054366	0.00177676	0.00144434
tca-mir-11619a-3-5p	223	16503	1908	3281	3028	1269	2168	2375	2604	1440	6335	5075	4865	2564	22	43	33	13	58	53	68	40	61	51	52	20	0.124264	0.259917	0.0437571	0.0856819	7.17653	4.20991	8.03118	5.4416	0.000140343	0.00233461	0.0102448	0.00115136
tca-mir-11617a-2-3p	501	16503	1908	3281	3028	1269	2168	2375	2604	1440	6335	5075	4865	2564	93	139	116	60	103	102	104	68	144	110	112	37	5.92127	5.18591	2.60035	3.64349	6.00479	4.06134	2.95964	4.02847	1.20518e-06	2.26469e-06	7.2924e-05	8.33577e-09
tca-mir-11617a-2-5p	273	16503	1908	3281	3028	1269	2168	2375	2604	1440	6335	5075	4865	2564	28	52	51	20	52	45	54	28	96	72	65	30	0.145551	0.220655	0.391313	0.273665	2.67839	0.851976	1.5117	0.807805	0.0699701	0.0284701	0.00917816	0.00835182
tca-mir-11622-3p	428	16503	1908	3281	3028	1269	2168	2375	2604	1440	6335	5075	4865	2564	55	91	74	34	96	86	95	62	129	101	102	50	0.750638	0.668549	0.16013	0.424135	7.50409	3.35942	3.79337	4.5852	8.19346e-05	0.000236913	0.00211471	0.00570777
tca-mir-11622-5p	630	16503	1908	3281	3028	1269	2168	2375	2604	1440	6335	5075	4865	2564	110	172	152	70	116	122	135	79	190	141	129	60	5.50078	5.74335	4.05208	3.1511	4.27946	3.71016	4.26306	3.40163	2.92581e-06	5.003e-07	4.96175e-08	2.00551e-06
tca-mir-11623-3p	93	16503	1908	3281	3028	1269	2168	2375	2604	1440	6335	5075	4865	2564	12	19	16	5	22	19	21	15	21	20	18	9	0.559821	0.4123	0.260282	0.137008	2.75647	1.39571	1.51705	2.19702	0.000372211	0.0136836	0.00794414	0.0323431
tca-mir-11623-5p	94	16503	1908	3281	3028	1269	2168	2375	2604	1440	6335	5075	4865	2564	11	20	13	7	24	22	22	16	27	23	19	12	0.39392	0.505406	0.0747038	0.359906	3.4495	2.18959	1.72756	2.53137	0.0142018	0.0512288	0.012383	0.143372
tca-mir-3851g-1-3p	277	16503	1908	3281	3028	1269	2168	2375	2604	1440	6335	5075	4865	2564	75	92	75	46	47	57	67	36	76	48	58	20	12.5968	7.31944	3.93698	6.67655	1.58006	2.74096	4.03546	2.21672	3.19912e-05	9.00998e-08	0.000334031	8.88737e-06
tca-mir-3851g-1-5p	187	16503	1908	3281	3028	1269	2168	2375	2604	1440	6335	5075	4865	2564	23	40	33	14	37	42	43	27	53	44	49	21	0.489006	0.574264	0.256798	0.326543	2.42098	2.98508	2.45351	2.47623	0.00106448	0.00760861	0.087538	0.0260512
tca-mir-11624a-1-3p	521	16503	1908	3281	3028	1269	2168	2375	2604	1440	6335	5075	4865	2564	88	141	119	62	130	119	133	81	150	121	110	43	4.02627	4.64605	2.43823	3.66031	13.3461	7.23986	8.66975	7.01249	8.59834e-07	2.85512e-05	3.19872e-06	1.63305e-07
tca-mir-11624a-1-5p	544	16503	1908	3281	3028	1269	2168	2375	2604	1440	6335	5075	4865	2564	74	121	107	45	108	103	123	67	159	129	136	47	1.22655	1.13131	0.715497	0.569358	5.50165	2.90695	5.06735	2.80076	1.49141e-06	5.7407e-05	0.00455087	4.08919e-07
tca-mir-11624a-2-3p	521	16503	1908	3281	3028	1269	2168	2375	2604	1440	6335	5075	4865	2564	88	141	119	62	130	119	133	81	150	121	110	43	4.02627	4.64605	2.43823	3.66031	13.3461	7.23986	8.66975	7.01249	8.59834e-07	2.85512e-05	3.19872e-06	1.63305e-07
tca-mir-11624a-2-5p	544	16503	1908	3281	3028	1269	2168	2375	2604	1440	6335	5075	4865	2564	74	121	107	45	108	103	123	67	159	129	136	47	1.22655	1.13131	0.715497	0.569358	5.50165	2.90695	5.06735	2.80076	1.49141e-06	5.7407e-05	0.00455087	4.08919e-07
tca-mir-3806b-1-3p	508	16503	1908	3281	3028	1269	2168	2375	2604	1440	6335	5075	4865	2564	69	121	100	40	119	118	136	77	153	109	107	52	1.17323	1.93912	0.705437	0.402472	10.3384	7.61641	10.354	6.25607	2.05949e-05	5.49661e-07	3.67347e-06	0.000124009
tca-mir-3806b-1-5p	235	16503	1908	3281	3028	1269	2168	2375	2604	1440	6335	5075	4865	2564	31	63	54	19	49	50	58	32	83	56	45	18	0.732309	2.42372	1.53235	0.454397	3.4737	2.82461	3.86608	2.36276	0.0875683	0.00485192	8.18816e-05	9.13117e-05
tca-mir-11624a-3-3p	521	16503	1908	3281	3028	1269	2168	2375	2604	1440	6335	5075	4865	2564	88	141	119	62	130	119	133	81	150	121	110	43	4.02627	4.64605	2.43823	3.66031	13.3461	7.23986	8.66975	7.01249	8.59834e-07	2.85512e-05	3.19872e-06	1.63305e-07
tca-mir-11624a-3-5p	544	16503	1908	3281	3028	1269	2168	2375	2604	1440	6335	5075	4865	2564	74	121	107	45	108	103	123	67	159	129	136	47	1.22655	1.13131	0.715497	0.569358	5.50165	2.90695	5.06735	2.80076	1.49141e-06	5.7407e-05	0.00455087	4.08919e-07
tca-mir-309c-3p	231	16503	1908	3281	3028	1269	2168	2375	2604	1440	6335	5075	4865	2564	64	73	50	32	45	43	57	27	60	50	47	14	11.3982	5.12149	1.07274	3.39414	2.62337	1.52655	3.81232	1.32601	1.80912e-05	0.000526125	0.000438646	3.22345e-06
tca-mir-309c-5p	1161	16503	1908	3281	3028	1269	2168	2375	2604	1440	6335	5075	4865	2564	174	296	268	115	225	227	258	146	361	266	252	107	3.97922	6.25325	4.96813	2.72723	9.67059	6.62885	9.0652	5.74017	2.0714e-08	2.01848e-10	1.63539e-10	1.73336e-11
tca-mir-11624b-1-3p	241	16503	1908	3281	3028	1269	2168	2375	2604	1440	6335	5075	4865	2564	33	54	57	24	47	50	56	34	73	57	55	25	0.894122	0.846135	1.82127	1.11147	2.71327	2.58092	3.05889	2.71678	0.00221235	0.00375935	0.0052713	0.00570005
tca-mir-11624b-1-5p	544	16503	1908	3281	3028	1269	2168	2375	2604	1440	6335	5075	4865	2564	74	121	107	45	108	103	123	67	159	129	136	47	1.22655	1.13131	0.715497	0.569358	5.50165	2.90695	5.06735	2.80076	1.49141e-06	5.7407e-05	0.00455087	4.08919e-07
tca-mir-3851h-3p	209	16503	1908	3281	3028	1269	2168	2375	2604	1440	6335	5075	4865	2564	62	69	51	34	30	34	50	22	63	41	41	15	12.5284	5.6354	1.96166	5.0081	0.584373	0.724241	3.12101	0.833177	0.00332772	7.88287e-05	0.000322732	8.59114e-05
tca-mir-3851h-5p	187	16503	1908	3281	3028	1269	2168	2375	2604	1440	6335	5075	4865	2564	23	40	33	14	37	42	43	27	53	44	49	21	0.489006	0.574264	0.256798	0.326543	2.42098	2.98508	2.45351	2.47623	0.00106448	0.00760861	0.087538	0.0260512
tca-mir-11624d-3p	241	16503	1908	3281	3028	1269	2168	2375	2604	1440	6335	5075	4865	2564	33	54	57	24	47	50	56	34	73	57	55	25	0.894122	0.846135	1.82127	1.11147	2.71327	2.58092	3.05889	2.71678	0.00221235	0.00375935	0.0052713	0.00570005
tca-mir-11624d-5p	312	16503	1908	3281	3028	1269	2168	2375	2604	1440	6335	5075	4865	2564	42	70	68	24	72	69	71	46	85	71	73	30	0.898017	0.944396	1.29501	0.351497	6.36124	4.10692	3.36577	3.81479	8.39152e-06	0.000417292	0.00401647	0.0006127
tca-mir-3851i-3p	209	16503	1908	3281	3028	1269	2168	2375	2604	1440	6335	5075	4865	2564	62	69	51	34	30	34	50	22	63	41	41	15	12.5284	5.6354	1.96166	5.0081	0.584373	0.724241	3.12101	0.833177	0.00332772	7.88287e-05	0.000322732	8.59114e-05
tca-mir-3851i-5p	255	16503	1908	3281	3028	1269	2168	2375	2604	1440	6335	5075	4865	2564	26	49	46	15	58	64	65	45	73	53	56	18	0.144837	0.244738	0.290683	0.0784844	5.10832	5.72895	4.69064	5.78738	0.000277715	9.36404e-05	0.00177171	1.31168e-05
tca-mir-3851j-3p	276	16503	1908	3281	3028	1269	2168	2375	2604	1440	6335	5075	4865	2564	77	96	71	48	47	51	74	34	76	46	50	15	13.6623	8.75974	3.0759	7.56981	1.60547	1.62549	6.09376	1.79684	3.80464e-05	2.20912e-08	3.88913e-06	5.94423e-08
tca-mir-3851j-5p	529	16503	1908	3281	3028	1269	2168	2375	2604	1440	6335	5075	4865	2564	61	114	105	38	117	112	114	73	159	135	121	48	0.323584	0.821191	0.776173	0.198059	8.56711	5.16457	3.82551	4.50291	1.2719e-05	0.00180465	0.000140396	2.69073e-06
tca-mir-11625a-3p	1341	16503	1908	3281	3028	1269	2168	2375	2604	1440	6335	5075	4865	2564	269	401	351	191	250	273	307	173	405	279	270	108	15	15	13.3023	15	8.97663	9.69201	12.3737	7.47441	1.80718e-11	0	1.44649e-16	0
tca-mir-11625a-5p	292	16503	1908	3281	3028	1269	2168	2375	2604	1440	6335	5075	4865	2564	49	83	69	30	62	58	62	40	86	64	63	17	2.54723	3.81357	2.04256	1.37691	4.40125	2.4121	2.29111	2.79415	0.000347513	0.000190215	0.000585065	9.26963e-08
tca-mir-11626a-3p	288	16503	1908	3281	3028	1269	2168	2375	2604	1440	6335	5075	4865	2564	32	50	53	24	62	51	67	34	90	75	61	27	0.259684	0.0741436	0.343266	0.534418	4.59242	1.32383	3.50666	1.54737	0.0028725	0.0198247	0.000371051	0.000610163
tca-mir-11626a-5p	143	16503	1908	3281	3028	1269	2168	2375	2604	1440	6335	5075	4865	2564	24	28	31	17	30	33	39	21	40	31	26	10	1.64542	0.313521	0.893159	1.58366	2.50911	2.73724	3.84397	2.2021	0.00248529	0.00433641	0.000585535	0.00070059
tca-mir-11626b-3p	288	16503	1908	3281	3028	1269	2168	2375	2604	1440	6335	5075	4865	2564	32	50	53	24	62	51	67	34	90	75	61	27	0.259684	0.0741436	0.343266	0.534418	4.59242	1.32383	3.50666	1.54737	0.0028725	0.0198247	0.000371051	0.000610163
tca-mir-11626b-5p	212	16503	1908	3281	3028	1269	2168	2375	2604	1440	6335	5075	4865	2564	31	46	44	20	46	54	61	30	65	48	40	19	1.15973	0.651089	0.800166	0.857266	3.73072	5.19245	6.3165	2.51833	0.00488724	0.00228244	0.0001154	0.00144434
tca-mir-3806b-2-3p	508	16503	1908	3281	3028	1269	2168	2375	2604	1440	6335	5075	4865	2564	69	121	100	40	119	118	136	77	153	109	107	52	1.17323	1.93912	0.705437	0.402472	10.3384	7.61641	10.354	6.25607	2.05949e-05	5.49661e-07	3.67347e-06	0.000124009
tca-mir-3806b-2-5p	235	16503	1908	3281	3028	1269	2168	2375	2604	1440	6335	5075	4865	2564	31	63	54	19	49	50	58	32	83	56	45	18	0.732309	2.42372	1.53235	0.454397	3.4737	2.82461	3.86608	2.36276	0.0875683	0.00485192	8.18816e-05	9.13117e-05
tca-mir-11624c-3p	521	16503	1908	3281	3028	1269	2168	2375	2604	1440	6335	5075	4865	2564	88	141	119	62	130	119	133	81	150	121	110	43	4.02627	4.64605	2.43823	3.66031	13.3461	7.23986	8.66975	7.01249	8.59834e-07	2.85512e-05	3.19872e-06	1.63305e-07
tca-mir-11624c-5p	544	16503	1908	3281	3028	1269	2168	2375	2604	1440	6335	5075	4865	2564	74	121	107	45	108	103	123	67	159	129	136	47	1.22655	1.13131	0.715497	0.569358	5.50165	2.90695	5.06735	2.80076	1.49141e-06	5.7407e-05	0.00455087	4.08919e-07
tca-mir-11627-3p	464	16503	1908	3281	3028	1269	2168	2375	2604	1440	6335	5075	4865	2564	61	120	93	38	89	83	96	60	152	116	106	50	0.903971	3.21616	0.811155	0.518724	4.10648	1.84558	2.7439	3.10062	0.00269499	0.00143948	0.000303263	0.000759821
tca-mir-11627-5p	157	16503	1908	3281	3028	1269	2168	2375	2604	1440	6335	5075	4865	2564	19	32	26	12	33	36	37	21	42	32	33	14	0.447056	0.407871	0.169043	0.363909	2.68778	2.85236	2.4135	1.74634	0.000600007	0.00100589	0.00460973	0.0045612
tca-mir-11628-3p	216	16503	1908	3281	3028	1269	2168	2375	2604	1440	6335	5075	4865	2564	31	51	49	22	48	48	55	33	71	53	54	19	1.07398	1.13457	1.36341	1.15588	4.12308	3.17541	4.10012	3.27114	0.0236014	0.0113443	0.0373981	0.00104093
tca-mir-11628-5p	2357	16503	1908	3281	3028	1269	2168	2375	2604	1440	6335	5075	4865	2564	379	603	543	246	431	451	518	285	749	516	517	195	12.3641	12.926	9.63049	7.0993	14.2222	11.5448	15	9.11085	1.53714e-13	0	0	0
tca-mir-11629-3p	1167	16503	1908	3281	3028	1269	2168	2375	2604	1440	6335	5075	4865	2564	167	281	255	105	226	227	256	145	374	287	283	116	2.88838	3.94518	3.13924	1.4147	9.6817	6.44839	8.43549	5.4137	7.68737e-07	3.73145e-07	9.05859e-06	2.33654e-09
tca-mir-11629-5p	1393	16503	1908	3281	3028	1269	2168	2375	2604	1440	6335	5075	4865	2564	202	353	312	129	266	272	313	181	445	310	319	145	3.67893	7.06577	4.54659	1.97178	10.661	7.79391	11.5465	8.03583	4.49292e-08	4.35876e-14	2.31337e-09	2.08818e-09
tca-mir-11630-3p	1500	16503	1908	3281	3028	1269	2168	2375	2604	1440	6335	5075	4865	2564	202	382	354	137	253	268	303	159	506	371	342	156	2.11116	7.87858	7.44951	1.86623	5.23864	4.41933	6.14079	2.43617	2.20708e-05	1.78299e-08	3.10659e-10	4.61637e-10
tca-mir-11630-5p	370	16503	1908	3281	3028	1269	2168	2375	2604	1440	6335	5075	4865	2564	58	90	82	34	81	81	87	56	104	80	79	32	2.19179	1.84231	1.59078	0.927784	6.02096	4.49891	4.47466	4.7799	7.61286e-06	2.03455e-05	9.87153e-05	2.33339e-05
tca-mir-3851n-2-3p	277	16503	1908	3281	3028	1269	2168	2375	2604	1440	6335	5075	4865	2564	75	92	75	46	47	57	67	36	76	48	58	20	12.5968	7.31944	3.93698	6.67655	1.58006	2.74096	4.03546	2.21672	3.19912e-05	9.00998e-08	0.000334031	8.88737e-06
tca-mir-3851n-2-5p	314	16503	1908	3281	3028	1269	2168	2375	2604	1440	6335	5075	4865	2564	46	82	74	30	74	67	77	49	98	66	67	27	1.41888	2.5658	2.10817	1.04399	6.89953	3.53317	4.72588	4.65383	0.00196353	2.75674e-05	0.000279486	7.62284e-05
tca-mir-3851l-3-3p	277	16503	1908	3281	3028	1269	2168	2375	2604	1440	6335	5075	4865	2564	75	92	75	46	47	57	67	36	76	48	58	20	12.5968	7.31944	3.93698	6.67655	1.58006	2.74096	4.03546	2.21672	3.19912e-05	9.00998e-08	0.000334031	8.88737e-06
tca-mir-3851l-3-5p	314	16503	1908	3281	3028	1269	2168	2375	2604	1440	6335	5075	4865	2564	46	82	74	30	74	67	77	49	98	66	67	27	1.41888	2.5658	2.10817	1.04399	6.89953	3.53317	4.72588	4.65383	0.00196353	2.75674e-05	0.000279486	7.62284e-05
tca-mir-3851k-3-3p	277	16503	1908	3281	3028	1269	2168	2375	2604	1440	6335	5075	4865	2564	75	92	75	46	47	57	67	36	76	48	58	20	12.5968	7.31944	3.93698	6.67655	1.58006	2.74096	4.03546	2.21672	3.19912e-05	9.00998e-08	0.000334031	8.88737e-06
tca-mir-3851k-3-5p	314	16503	1908	3281	3028	1269	2168	2375	2604	1440	6335	5075	4865	2564	46	82	74	30	74	67	77	49	98	66	67	27	1.41888	2.5658	2.10817	1.04399	6.89953	3.53317	4.72588	4.65383	0.00196353	2.75674e-05	0.000279486	7.62284e-05
tca-mir-11618b-3-3p	574	16503	1908	3281	3028	1269	2168	2375	2604	1440	6335	5075	4865	2564	114	168	139	73	119	113	135	74	160	124	122	46	8.7701	7.78483	3.84831	5.14566	7.01105	3.78322	6.47276	3.59478	2.06849e-08	1.72994e-07	1.62093e-06	1.4475e-08
tca-mir-11618b-3-5p	212	16503	1908	3281	3028	1269	2168	2375	2604	1440	6335	5075	4865	2564	34	50	39	23	48	47	55	35	61	49	44	22	1.72359	1.11731	0.346772	1.44016	4.3411	3.10382	4.34107	4.09761	0.00088278	0.0035648	0.00108607	0.00847663
tca-mir-11618a-3-3p	241	16503	1908	3281	3028	1269	2168	2375	2604	1440	6335	5075	4865	2564	34	61	53	23	49	51	52	35	65	52	58	25	1.03686	1.80795	1.20431	0.937598	3.20856	2.8101	2.18533	2.99767	4.97974e-05	0.000383237	0.0155794	0.00570005
tca-mir-11618a-3-5p	212	16503	1908	3281	3028	1269	2168	2375	2604	1440	6335	5075	4865	2564	34	50	39	23	48	47	55	35	61	49	44	22	1.72359	1.11731	0.346772	1.44016	4.3411	3.10382	4.34107	4.09761	0.00088278	0.0035648	0.00108607	0.00847663
tca-mir-3806b-3-3p	508	16503	1908	3281	3028	1269	2168	2375	2604	1440	6335	5075	4865	2564	69	121	100	40	119	118	136	77	153	109	107	52	1.17323	1.93912	0.705437	0.402472	10.3384	7.61641	10.354	6.25607	2.05949e-05	5.49661e-07	3.67347e-06	0.000124009
tca-mir-3806b-3-5p	235	16503	1908	3281	3028	1269	2168	2375	2604	1440	6335	5075	4865	2564	31	63	54	19	49	50	58	32	83	56	45	18	0.732309	2.42372	1.53235	0.454397	3.4737	2.82461	3.86608	2.36276	0.0875683	0.00485192	8.18816e-05	9.13117e-05
tca-mir-3851m-3-3p	277	16503	1908	3281	3028	1269	2168	2375	2604	1440	6335	5075	4865	2564	75	92	75	46	47	57	67	36	76	48	58	20	12.5968	7.31944	3.93698	6.67655	1.58006	2.74096	4.03546	2.21672	3.19912e-05	9.00998e-08	0.000334031	8.88737e-06
tca-mir-3851m-3-5p	314	16503	1908	3281	3028	1269	2168	2375	2604	1440	6335	5075	4865	2564	46	82	74	30	74	67	77	49	98	66	67	27	1.41888	2.5658	2.10817	1.04399	6.89953	3.53317	4.72588	4.65383	0.00196353	2.75674e-05	0.000279486	7.62284e-05
tca-mir-11617a-3-3p	329	16503	1908	3281	3028	1269	2168	2375	2604	1440	6335	5075	4865	2564	64	92	76	43	64	60	69	43	97	73	71	27	5.01786	3.85091	1.92984	3.65226	3.35878	1.67785	2.32796	2.53834	0.000175743	0.000130749	0.000302784	2.10244e-05
tca-mir-11617a-3-5p	273	16503	1908	3281	3028	1269	2168	2375	2604	1440	6335	5075	4865	2564	28	52	51	20	52	45	54	28	96	72	65	30	0.145551	0.220655	0.391313	0.273665	2.67839	0.851976	1.5117	0.807805	0.0699701	0.0284701	0.00917816	0.00835182
tca-mir-11619a-1-3p	334	16503	1908	3281	3028	1269	2168	2375	2604	1440	6335	5075	4865	2564	46	72	60	23	78	79	97	51	90	76	64	24	1.05077	0.703067	0.268559	0.176222	7.04035	5.7224	9.67959	4.54123	2.52498e-06	0.000280698	4.1085e-06	1.13133e-06
tca-mir-11619a-1-5p	223	16503	1908	3281	3028	1269	2168	2375	2604	1440	6335	5075	4865	2564	22	43	33	13	58	53	68	40	61	51	52	20	0.124264	0.259917	0.0437571	0.0856819	7.17653	4.20991	8.03118	5.4416	0.000140343	0.00233461	0.0102448	0.00115136
tca-mir-3851m-2-3p	277	16503	1908	3281	3028	1269	2168	2375	2604	1440	6335	5075	4865	2564	75	92	75	46	47	57	67	36	76	48	58	20	12.5968	7.31944	3.93698	6.67655	1.58006	2.74096	4.03546	2.21672	3.19912e-05	9.00998e-08	0.000334031	8.88737e-06
tca-mir-3851m-2-5p	314	16503	1908	3281	3028	1269	2168	2375	2604	1440	6335	5075	4865	2564	46	82	74	30	74	67	77	49	98	66	67	27	1.41888	2.5658	2.10817	1.04399	6.89953	3.53317	4.72588	4.65383	0.00196353	2.75674e-05	0.000279486	7.62284e-05
tca-mir-11618a-5-3p	241	16503	1908	3281	3028	1269	2168	2375	2604	1440	6335	5075	4865	2564	34	61	53	23	49	51	52	35	65	52	58	25	1.03686	1.80795	1.20431	0.937598	3.20856	2.8101	2.18533	2.99767	4.97974e-05	0.000383237	0.0155794	0.00570005
tca-mir-11618a-5-5p	212	16503	1908	3281	3028	1269	2168	2375	2604	1440	6335	5075	4865	2564	34	50	39	23	48	47	55	35	61	49	44	22	1.72359	1.11731	0.346772	1.44016	4.3411	3.10382	4.34107	4.09761	0.00088278	0.0035648	0.00108607	0.00847663
tca-mir-11618b-4-3p	574	16503	1908	3281	3028	1269	2168	2375	2604	1440	6335	5075	4865	2564	114	168	139	73	119	113	135	74	160	124	122	46	8.7701	7.78483	3.84831	5.14566	7.01105	3.78322	6.47276	3.59478	2.06849e-08	1.72994e-07	1.62093e-06	1.4475e-08
tca-mir-11618b-4-5p	212	16503	1908	3281	3028	1269	2168	2375	2604	1440	6335	5075	4865	2564	34	50	39	23	48	47	55	35	61	49	44	22	1.72359	1.11731	0.346772	1.44016	4.3411	3.10382	4.34107	4.09761	0.00088278	0.0035648	0.00108607	0.00847663
tca-mir-3851k-4-3p	277	16503	1908	3281	3028	1269	2168	2375	2604	1440	6335	5075	4865	2564	75	92	75	46	47	57	67	36	76	48	58	20	12.5968	7.31944	3.93698	6.67655	1.58006	2.74096	4.03546	2.21672	3.19912e-05	9.00998e-08	0.000334031	8.88737e-06
tca-mir-3851k-4-5p	314	16503	1908	3281	3028	1269	2168	2375	2604	1440	6335	5075	4865	2564	46	82	74	30	74	67	77	49	98	66	67	27	1.41888	2.5658	2.10817	1.04399	6.89953	3.53317	4.72588	4.65383	0.00196353	2.75674e-05	0.000279486	7.62284e-05
tca-mir-11619a-2-3p	334	16503	1908	3281	3028	1269	2168	2375	2604	1440	6335	5075	4865	2564	46	72	60	23	78	79	97	51	90	76	64	24	1.05077	0.703067	0.268559	0.176222	7.04035	5.7224	9.67959	4.54123	2.52498e-06	0.000280698	4.1085e-06	1.13133e-06
tca-mir-11619a-2-5p	223	16503	1908	3281	3028	1269	2168	2375	2604	1440	6335	5075	4865	2564	22	43	33	13	58	53	68	40	61	51	52	20	0.124264	0.259917	0.0437571	0.0856819	7.17653	4.20991	8.03118	5.4416	0.000140343	0.00233461	0.0102448	0.00115136
tca-mir-11617a-4-3p	329	16503	1908	3281	3028	1269	2168	2375	2604	1440	6335	5075	4865	2564	64	92	76	43	64	60	69	43	97	73	71	27	5.01786	3.85091	1.92984	3.65226	3.35878	1.67785	2.32796	2.53834	0.000175743	0.000130749	0.000302784	2.10244e-05
tca-mir-11617a-4-5p	273	16503	1908	3281	3028	1269	2168	2375	2604	1440	6335	5075	4865	2564	28	52	51	20	52	45	54	28	96	72	65	30	0.145551	0.220655	0.391313	0.273665	2.67839	0.851976	1.5117	0.807805	0.0699701	0.0284701	0.00917816	0.00835182
tca-mir-11618a-2-3p	160	16503	1908	3281	3028	1269	2168	2375	2604	1440	6335	5075	4865	2564	23	36	31	16	33	33	44	24	51	37	23	12	0.960485	0.758161	0.489561	0.964031	2.54595	1.9363	4.30702	2.51742	0.0228793	0.00876982	2.46272e-06	0.000759929
tca-mir-11618a-2-5p	212	16503	1908	3281	3028	1269	2168	2375	2604	1440	6335	5075	4865	2564	34	50	39	23	48	47	55	35	61	49	44	22	1.72359	1.11731	0.346772	1.44016	4.3411	3.10382	4.34107	4.09761	0.00088278	0.0035648	0.00108607	0.00847663
tca-mir-3806b-4-3p	508	16503	1908	3281	3028	1269	2168	2375	2604	1440	6335	5075	4865	2564	69	121	100	40	119	118	136	77	153	109	107	52	1.17323	1.93912	0.705437	0.402472	10.3384	7.61641	10.354	6.25607	2.05949e-05	5.49661e-07	3.67347e-06	0.000124009
tca-mir-3806b-4-5p	235	16503	1908	3281	3028	1269	2168	2375	2604	1440	6335	5075	4865	2564	31	63	54	19	49	50	58	32	83	56	45	18	0.732309	2.42372	1.53235	0.454397	3.4737	2.82461	3.86608	2.36276	0.0875683	0.00485192	8.18816e-05	9.13117e-05
tca-mir-971b-3p	511	16503	1908	3281	3028	1269	2168	2375	2604	1440	6335	5075	4865	2564	84	121	107	60	101	94	104	63	156	129	121	57	3.48137	1.85996	1.24286	3.41429	5.1136	2.33869	2.66568	2.69038	4.40696e-05	0.00136438	0.000750909	0.00106199
tca-mir-971b-5p	555	16503	1908	3281	3028	1269	2168	2375	2604	1440	6335	5075	4865	2564	77	128	114	45	119	106	129	75	174	135	119	52	1.41415	1.57993	1.0953	0.498068	7.86811	3.10432	5.9303	4.29257	0.000115765	0.000172695	3.77674e-06	4.44203e-06
tca-mir-11619c-3p	334	16503	1908	3281	3028	1269	2168	2375	2604	1440	6335	5075	4865	2564	46	72	60	23	78	79	97	51	90	76	64	24	1.05077	0.703067	0.268559	0.176222	7.04035	5.7224	9.67959	4.54123	2.52498e-06	0.000280698	4.1085e-06	1.13133e-06
tca-mir-11619c-5p	152	16503	1908	3281	3028	1269	2168	2375	2604	1440	6335	5075	4865	2564	18	37	28	11	28	26	26	16	44	40	38	14	0.403379	1.14632	0.356172	0.295961	1.62305	0.847537	0.551025	0.761219	0.00403388	0.0627507	0.0599657	0.00686275
tca-mir-11619d-3p	612	16503	1908	3281	3028	1269	2168	2375	2604	1440	6335	5075	4865	2564	76	136	125	53	107	112	136	68	197	152	134	56	0.64287	1.19072	1.08993	0.797245	3.14123	2.57137	5.10373	1.79198	0.000296006	0.000257653	4.4862e-06	6.76872e-07
tca-mir-11619d-5p	264	16503	1908	3281	3028	1269	2168	2375	2604	1440	6335	5075	4865	2564	42	71	53	22	43	48	50	31	87	55	62	29	1.89568	2.66961	0.684047	0.528523	1.25135	1.45781	1.16188	1.44482	0.0167092	7.84566e-05	0.00744914	0.00913707
tca-mir-3851q-3p	279	16503	1908	3281	3028	1269	2168	2375	2604	1440	6335	5075	4865	2564	51	72	65	34	46	46	52	28	80	68	67	31	3.48405	2.21319	1.83121	2.5495	1.3707	0.859965	1.08348	0.73235	0.000168547	0.00466003	0.0104632	0.00913133
tca-mir-3851q-5p	239	16503	1908	3281	3028	1269	2168	2375	2604	1440	6335	5075	4865	2564	36	63	55	25	51	50	60	40	72	50	52	22	1.40477	2.24455	1.55965	1.33777	3.84061	2.66023	4.19435	4.68533	0.00195097	0.000174632	0.00186453	0.00118048
tca-mir-11625b-3p	1341	16503	1908	3281	3028	1269	2168	2375	2604	1440	6335	5075	4865	2564	269	401	351	191	250	273	307	173	405	279	270	108	15	15	13.3023	15	8.97663	9.69201	12.3737	7.47441	1.80718e-11	0	1.44649e-16	0
tca-mir-11625b-5p	292	16503	1908	3281	3028	1269	2168	2375	2604	1440	6335	5075	4865	2564	49	83	69	30	62	58	62	40	86	64	63	17	2.54723	3.81357	2.04256	1.37691	4.40125	2.4121	2.29111	2.79415	0.000347513	0.000190215	0.000585065	9.26963e-08
tca-mir-3851g-2-3p	188	16503	1908	3281	3028	1269	2168	2375	2604	1440	6335	5075	4865	2564	32	49	39	19	42	37	40	25	52	43	38	15	2.02789	1.82056	0.76748	1.06129	3.78002	1.75449	1.7578	1.89769	0.000541045	0.00438434	0.00108764	0.000634838
tca-mir-3851g-2-5p	187	16503	1908	3281	3028	1269	2168	2375	2604	1440	6335	5075	4865	2564	23	40	33	14	37	42	43	27	53	44	49	21	0.489006	0.574264	0.256798	0.326543	2.42098	2.98508	2.45351	2.47623	0.00106448	0.00760861	0.087538	0.0260512
tca-mir-11631-3p	131	16503	1908	3281	3028	1269	2168	2375	2604	1440	6335	5075	4865	2564	20	29	27	14	26	25	31	20	41	35	31	16	1.12231	0.655553	0.670509	1.10721	1.96047	1.27757	2.18344	2.33416	0.0246126	0.0872821	0.0378236	0.0841618
tca-mir-11631-5p	141	16503	1908	3281	3028	1269	2168	2375	2604	1440	6335	5075	4865	2564	20	35	28	12	36	32	38	21	41	34	26	14	0.871157	1.22244	0.556323	0.539958	4.66403	2.55651	3.65275	2.27523	0.0056625	0.0222272	0.000802195	0.0161136
tca-mir-3851d-1-3p	209	16503	1908	3281	3028	1269	2168	2375	2604	1440	6335	5075	4865	2564	62	69	51	34	30	34	50	22	63	41	41	15	12.5284	5.6354	1.96166	5.0081	0.584373	0.724241	3.12101	0.833177	0.00332772	7.88287e-05	0.000322732	8.59114e-05
tca-mir-3851d-1-5p	187	16503	1908	3281	3028	1269	2168	2375	2604	1440	6335	5075	4865	2564	23	40	33	14	37	42	43	27	53	44	49	21	0.489006	0.574264	0.256798	0.326543	2.42098	2.98508	2.45351	2.47623	0.00106448	0.00760861	0.087538	0.0260512
tca-mir-3858a-2-3p	605	16503	1908	3281	3028	1269	2168	2375	2604	1440	6335	5075	4865	2564	74	137	121	42	124	126	138	83	196	150	132	61	0.561711	1.4137	0.881937	0.136693	6.97846	5.32758	5.80436	4.90777	0.000459518	0.000253577	4.11796e-06	2.05955e-05
tca-mir-3858a-2-5p	258	16503	1908	3281	3028	1269	2168	2375	2604	1440	6335	5075	4865	2564	28	62	58	22	54	62	69	41	87	54	47	25	0.226249	1.38176	1.42193	0.586632	3.78092	4.92462	5.70593	4.2331	0.0303061	0.000106113	8.98029e-06	0.00173328
tca-mir-3851d-2-3p	209	16503	1908	3281	3028	1269	2168	2375	2604	1440	6335	5075	4865	2564	62	69	51	34	30	34	50	22	63	41	41	15	12.5284	5.6354	1.96166	5.0081	0.584373	0.724241	3.12101	0.833177	0.00332772	7.88287e-05	0.000322732	8.59114e-05
tca-mir-3851d-2-5p	257	16503	1908	3281	3028	1269	2168	2375	2604	1440	6335	5075	4865	2564	38	64	51	19	54	49	57	31	69	53	56	22	1.33816	1.711	0.624178	0.290956	3.82687	1.82431	2.59627	1.58725	2.5193e-05	7.01595e-05	0.00141341	0.00027238
tca-mir-11617b-3p	790	16503	1908	3281	3028	1269	2168	2375	2604	1440	6335	5075	4865	2564	149	228	193	95	145	142	175	96	254	195	180	79	9.50833	9.66905	5.30459	5.37099	5.08168	2.74764	6.25161	3.47535	4.80343e-05	2.93794e-05	3.9847e-06	1.01687e-06
tca-mir-11617b-5p	322	16503	1908	3281	3028	1269	2168	2375	2604	1440	6335	5075	4865	2564	40	65	55	31	70	71	79	46	103	86	75	40	0.556726	0.384936	0.158079	1.09192	5.21909	4.15667	4.833	3.49299	0.00410613	0.0278034	0.00318619	0.0298282
tca-mir-3858b-3p	605	16503	1908	3281	3028	1269	2168	2375	2604	1440	6335	5075	4865	2564	74	137	121	42	124	126	138	83	196	150	132	61	0.561711	1.4137	0.881937	0.136693	6.97846	5.32758	5.80436	4.90777	0.000459518	0.000253577	4.11796e-06	2.05955e-05
tca-mir-3858b-5p	226	16503	1908	3281	3028	1269	2168	2375	2604	1440	6335	5075	4865	2564	25	52	55	17	39	49	52	30	69	39	47	13	0.265883	0.984667	2.03222	0.324233	1.5308	2.97095	2.79996	2.10701	0.00351918	1.0332e-06	0.00083516	1.89875e-06
tca-mir-11632-3p	322	16503	1908	3281	3028	1269	2168	2375	2604	1440	6335	5075	4865	2564	40	65	55	31	70	71	79	46	103	86	75	40	0.556726	0.384936	0.158079	1.09192	5.21909	4.15667	4.833	3.49299	0.00410613	0.0278034	0.00318619	0.0298282
tca-mir-11632-5p	243	16503	1908	3281	3028	1269	2168	2375	2604	1440	6335	5075	4865	2564	40	55	46	18	54	62	65	46	88	51	53	27	2.08288	0.909469	0.433107	0.29704	4.51944	5.83975	5.43505	6.81185	0.132915	0.000171426	0.0018419	0.0131293
tca-mir-11633-3p	128	16503	1908	3281	3028	1269	2168	2375	2604	1440	6335	5075	4865	2564	18	30	24	11	33	32	38	23	43	22	28	18	0.817674	0.880667	0.398608	0.553503	4.45545	3.31866	4.66137	3.57833	0.0715076	0.000146677	0.014799	0.20519
tca-mir-11633-5p	260	16503	1908	3281	3028	1269	2168	2375	2604	1440	6335	5075	4865	2564	35	46	41	22	56	62	68	39	74	57	60	31	0.840911	0.102134	0.0746963	0.566716	4.24453	4.8121	5.27084	3.5281	0.000201199	0.000384804	0.00527889	0.0263197
tca-mir-3836g-1-3p	231	16503	1908	3281	3028	1269	2168	2375	2604	1440	6335	5075	4865	2564	64	73	50	32	45	43	57	27	60	50	47	14	11.3982	5.12149	1.07274	3.39414	2.62337	1.52655	3.81232	1.32601	1.80912e-05	0.000526125	0.000438646	3.22345e-06
tca-mir-3836g-1-5p	159	16503	1908	3281	3028	1269	2168	2375	2604	1440	6335	5075	4865	2564	20	36	29	13	38	36	39	22	51	38	35	16	0.535902	0.784793	0.332769	0.47024	4.16809	2.74826	2.8383	1.9577	0.0258852	0.0150793	0.00933063	0.0134727
tca-mir-3836g-2-3p	231	16503	1908	3281	3028	1269	2168	2375	2604	1440	6335	5075	4865	2564	64	73	50	32	45	43	57	27	60	50	47	14	11.3982	5.12149	1.07274	3.39414	2.62337	1.52655	3.81232	1.32601	1.80912e-05	0.000526125	0.000438646	3.22345e-06
tca-mir-3836g-2-5p	159	16503	1908	3281	3028	1269	2168	2375	2604	1440	6335	5075	4865	2564	20	36	29	13	38	36	39	22	51	38	35	16	0.535902	0.784793	0.332769	0.47024	4.16809	2.74826	2.8383	1.9577	0.0258852	0.0150793	0.00933063	0.0134727
tca-mir-3851m-4-3p	277	16503	1908	3281	3028	1269	2168	2375	2604	1440	6335	5075	4865	2564	75	92	75	46	47	57	67	36	76	48	58	20	12.5968	7.31944	3.93698	6.67655	1.58006	2.74096	4.03546	2.21672	3.19912e-05	9.00998e-08	0.000334031	8.88737e-06
tca-mir-3851m-4-5p	314	16503	1908	3281	3028	1269	2168	2375	2604	1440	6335	5075	4865	2564	46	82	74	30	74	67	77	49	98	66	67	27	1.41888	2.5658	2.10817	1.04399	6.89953	3.53317	4.72588	4.65383	0.00196353	2.75674e-05	0.000279486	7.62284e-05
tca-mir-3851r-3p	277	16503	1908	3281	3028	1269	2168	2375	2604	1440	6335	5075	4865	2564	75	92	75	46	47	57	67	36	76	48	58	20	12.5968	7.31944	3.93698	6.67655	1.58006	2.74096	4.03546	2.21672	3.19912e-05	9.00998e-08	0.000334031	8.88737e-06
tca-mir-3851r-5p	314	16503	1908	3281	3028	1269	2168	2375	2604	1440	6335	5075	4865	2564	46	82	74	30	74	67	77	49	98	66	67	27	1.41888	2.5658	2.10817	1.04399	6.89953	3.53317	4.72588	4.65383	0.00196353	2.75674e-05	0.000279486	7.62284e-05
tca-mir-3836c-4-3p	231	16503	1908	3281	3028	1269	2168	2375	2604	1440	6335	5075	4865	2564	64	73	50	32	45	43	57	27	60	50	47	14	11.3982	5.12149	1.07274	3.39414	2.62337	1.52655	3.81232	1.32601	1.80912e-05	0.000526125	0.000438646	3.22345e-06
tca-mir-3836c-4-5p	212	16503	1908	3281	3028	1269	2168	2375	2604	1440	6335	5075	4865	2564	32	57	53	22	43	42	40	23	68	61	60	31	1.33437	2.29634	2.22903	1.22799	2.90018	1.93974	1.03133	0.947975	0.0143385	0.150148	0.210862	0.221594
tca-mir-11634-3p	101	16503	1908	3281	3028	1269	2168	2375	2604	1440	6335	5075	4865	2564	10	18	18	7	23	23	26	19	35	26	21	8	0.2006	0.190008	0.307637	0.285079	2.60082	2.09483	2.4844	3.39845	0.126393	0.0767924	0.0141215	0.00777659
tca-mir-11634-5p	305	16503	1908	3281	3028	1269	2168	2375	2604	1440	6335	5075	4865	2564	37	62	60	21	68	68	67	43	87	70	74	31	0.473427	0.410332	0.608318	0.183724	5.49546	4.17474	2.79615	3.20006	7.46686e-05	0.000613621	0.0104819	0.00175189
tca-mir-3851l-1-3p	277	16503	1908	3281	3028	1269	2168	2375	2604	1440	6335	5075	4865	2564	75	92	75	46	47	57	67	36	76	48	58	20	12.5968	7.31944	3.93698	6.67655	1.58006	2.74096	4.03546	2.21672	3.19912e-05	9.00998e-08	0.000334031	8.88737e-06
tca-mir-3851l-1-5p	314	16503	1908	3281	3028	1269	2168	2375	2604	1440	6335	5075	4865	2564	46	82	74	30	74	67	77	49	98	66	67	27	1.41888	2.5658	2.10817	1.04399	6.89953	3.53317	4.72588	4.65383	0.00196353	2.75674e-05	0.000279486	7.62284e-05
tca-mir-3836c-5-3p	231	16503	1908	3281	3028	1269	2168	2375	2604	1440	6335	5075	4865	2564	64	73	50	32	45	43	57	27	60	50	47	14	11.3982	5.12149	1.07274	3.39414	2.62337	1.52655	3.81232	1.32601	1.80912e-05	0.000526125	0.000438646	3.22345e-06
tca-mir-3836c-5-5p	212	16503	1908	3281	3028	1269	2168	2375	2604	1440	6335	5075	4865	2564	32	57	53	22	43	42	40	23	68	61	60	31	1.33437	2.29634	2.22903	1.22799	2.90018	1.93974	1.03133	0.947975	0.0143385	0.150148	0.210862	0.221594
tca-mir-11635-3p	527	16503	1908	3281	3028	1269	2168	2375	2604	1440	6335	5075	4865	2564	112	149	121	78	124	128	140	87	132	97	111	38	10.4723	6.00817	2.54782	8.20245	10.8747	9.48715	10.3735	8.74155	1.37078e-11	2.00979e-11	2.49893e-06	1.57731e-09
tca-mir-11636-3p	522	16503	1908	3281	3028	1269	2168	2375	2604	1440	6335	5075	4865	2564	69	130	119	55	119	106	131	74	159	123	141	50	0.986203	2.73567	2.40935	2.15787	9.54649	4.14128	8.05741	4.96162	3.25438e-05	5.7375e-05	0.0520473	1.56168e-05
tca-mir-11636-5p	115	16503	1908	3281	3028	1269	2168	2375	2604	1440	6335	5075	4865	2564	20	25	28	14	28	24	25	19	35	29	22	10	1.65095	0.579097	1.39048	1.51982	3.47333	1.67579	1.47037	2.66669	0.0207021	0.0535241	0.003402	0.00995587
tca-mir-3806c-3p	508	16503	1908	3281	3028	1269	2168	2375	2604	1440	6335	5075	4865	2564	69	121	100	40	119	118	136	77	153	109	107	52	1.17323	1.93912	0.705437	0.402472	10.3384	7.61641	10.354	6.25607	2.05949e-05	5.49661e-07	3.67347e-06	0.000124009
tca-mir-11637-5p	2211	16503	1908	3281	3028	1269	2168	2375	2604	1440	6335	5075	4865	2564	345	539	500	224	426	432	493	287	702	540	488	211	9.52332	7.97482	7.65862	5.49386	15	12.4538	15	12.7521	8.22523e-13	4.49569e-13	0	0
tca-mir-11638-3p	96	16503	1908	3281	3028	1269	2168	2375	2604	1440	6335	5075	4865	2564	18	23	16	8	18	21	25	11	23	17	20	5	1.88658	0.886259	0.21755	0.49745	1.36957	1.78327	2.49662	0.884742	0.000838507	0.00117546	0.016277	0.000687266
tca-mir-3836h-3p	231	16503	1908	3281	3028	1269	2168	2375	2604	1440	6335	5075	4865	2564	64	73	50	32	45	43	57	27	60	50	47	14	11.3982	5.12149	1.07274	3.39414	2.62337	1.52655	3.81232	1.32601	1.80912e-05	0.000526125	0.000438646	3.22345e-06
tca-mir-11639-3p	222	16503	1908	3281	3028	1269	2168	2375	2604	1440	6335	5075	4865	2564	37	53	37	19	41	49	59	31	66	51	48	15	2.07055	1.22912	0.149047	0.581992	2.04639	3.15279	4.9301	2.48267	0.00181289	0.00262951	0.00219248	2.3067e-05
tca-mir-11617d-1-5p	695	16503	1908	3281	3028	1269	2168	2375	2604	1440	6335	5075	4865	2564	105	164	146	68	157	158	184	101	192	159	145	63	2.79161	2.22096	1.51928	1.77773	12.0049	9.18969	13.2479	6.99884	3.21308e-10	6.54323e-07	4.20771e-08	8.92449e-08
tca-bantam-3p	329	16503	1908	3281	3028	1269	2168	2375	2604	1440	6335	5075	4865	2564	55	84	62	31	62	74	89	48	94	65	68	19	2.72185	2.3219	0.426663	0.999007	2.91415	4.6005	7.32496	3.82818	4.54801e-05	1.68635e-06	7.24726e-05	1.30635e-08
tca-bantam-5p	918	16503	1908	3281	3028	1269	2168	2375	2604	1440	6335	5075	4865	2564	124	225	196	87	188	185	210	128	283	203	204	83	1.56125	3.75526	2.11497	1.75174	10.1793	6.41665	8.55926	7.56938	2.35581e-07	5.30232e-10	9.65985e-08	7.88863e-10
tca-let-7-3p	1183	16503	1908	3281	3028	1269	2168	2375	2604	1440	6335	5075	4865	2564	179	280	262	117	254	257	289	170	372	292	267	107	4.30618	3.41204	3.58269	2.74036	15	12.2279	15	10.9553	6.46932e-08	4.48062e-07	8.1235e-09	2.97968e-12
tca-let-7-5p	256	16503	1908	3281	3028	1269	2168	2375	2604	1440	6335	5075	4865	2564	36	56	55	23	62	63	72	45	80	62	49	24	1.04672	0.727518	1.07224	0.740659	6.38155	5.3484	6.83083	5.73888	0.00436089	0.00530054	4.25354e-05	0.00110707
tca-mir-1-3p	637	16503	1908	3281	3028	1269	2168	2375	2604	1440	6335	5075	4865	2564	119	190	166	79	119	137	160	86	195	140	127	52	7.50056	9.4309	6.45616	5.08575	4.65985	6.53974	9.69059	4.78561	7.88429e-06	1.29878e-07	6.83026e-09	5.18898e-09
tca-mir-1-5p	161	16503	1908	3281	3028	1269	2168	2375	2604	1440	6335	5075	4865	2564	19	37	36	15	31	29	44	16	57	42	40	23	0.3961	0.858424	1.09706	0.757193	1.98617	1.09702	4.23555	0.620848	0.120776	0.0522673	0.0516366	0.20678
tca-mir-10-3p	1183	16503	1908	3281	3028	1269	2168	2375	2604	1440	6335	5075	4865	2564	171	305	280	121	235	224	264	151	375	273	260	104	3.14308	6.91066	6.10241	3.35865	11.189	5.48008	9.45969	6.30326	1.75198e-07	3.1747e-10	4.51689e-10	3.92192e-13
tca-mir-10-5p	275	16503	1908	3281	3028	1269	2168	2375	2604	1440	6335	5075	4865	2564	32	73	63	22	61	60	67	39	87	57	60	24	0.359031	2.56226	1.64714	0.43409	4.95506	3.52035	4.13795	3.0334	0.00491744	4.93826e-05	0.00107262	0.000244054
tca-mir-100-3p	387	16503	1908	3281	3028	1269	2168	2375	2604	1440	6335	5075	4865	2564	37	85	81	29	86	77	96	56	127	103	86	45	0.0556692	0.868178	1.07917	0.292846	6.6321	2.96493	5.90241	4.21484	0.00541067	0.017999	0.000312276	0.00715592
tca-mir-100-5p	75	16503	1908	3281	3028	1269	2168	2375	2604	1440	6335	5075	4865	2564	12	17	11	7	12	11	17	8	19	17	17	6	1.05606	0.652478	0.127924	0.662459	0.745111	0.404767	1.3835	0.688101	0.00520761	0.0356131	0.0552437	0.0185944
tca-mir-1000-3p	227	16503	1908	3281	3028	1269	2168	2375	2604	1440	6335	5075	4865	2564	27	42	38	16	47	43	57	32	78	62	58	29	0.412015	0.176963	0.153432	0.235206	3.29623	1.64428	4.03379	2.60199	0.0540982	0.0678695	0.0494162	0.0669222
tca-mir-1000-5p	1649	16503	1908	3281	3028	1269	2168	2375	2604	1440	6335	5075	4865	2564	227	386	342	144	312	319	367	203	553	426	412	176	2.77183	4.05345	2.38958	1.35492	11.9879	8.63503	12.9293	7.08066	4.14958e-06	9.33206e-07	4.68764e-06	5.60862e-10
tca-mir-11-3p	1653	16503	1908	3281	3028	1269	2168	2375	2604	1440	6335	5075	4865	2564	372	552	490	262	281	288	342	190	476	348	323	126	15	15	15	15	6.06476	3.89244	8.02946	4.68424	0	0	0	0
tca-mir-11-5p	203	16503	1908	3281	3028	1269	2168	2375	2604	1440	6335	5075	4865	2564	26	42	39	17	47	49	50	35	62	39	40	16	0.607593	0.45973	0.475149	0.524805	4.533	4.14449	3.4352	4.50504	0.00511138	5.7239e-05	0.000422615	0.000354048
tca-mir-1175-3p	424	16503	1908	3281	3028	1269	2168	2375	2604	1440	6335	5075	4865	2564	68	104	105	46	75	80	94	49	148	103	103	39	2.68859	2.12955	3.46859	2.14696	2.56175	2.38512	3.7427	1.75485	0.0333566	0.00075916	0.00405625	3.13743e-05
tca-mir-1175-5p	231	16503	1908	3281	3028	1269	2168	2375	2604	1440	6335	5075	4865	2564	36	56	43	20	42	52	56	30	59	57	53	21	1.6034	1.37475	0.379163	0.615808	1.9603	3.51046	3.54685	1.97452	9.80017e-06	0.0106808	0.00672643	0.00116794
tca-mir-12-3p	120	16503	1908	3281	3028	1269	2168	2375	2604	1440	6335	5075	4865	2564	12	17	17	7	40	31	31	25	36	30	27	12	0.192895	0.0306253	0.0661852	0.146982	8.55405	3.51714	2.81842	4.95084	0.0151334	0.0458812	0.0241496	0.024272
tca-mir-12-5p	525	16503	1908	3281	3028	1269	2168	2375	2604	1440	6335	5075	4865	2564	79	130	125	52	126	132	143	84	147	108	100	38	2.23607	2.63895	3.22723	1.60265	11.6701	10.857	11.4481	7.81813	1.07714e-07	2.97426e-08	8.70569e-09	1.92107e-09
tca-mir-124-3p	495	16503	1908	3281	3028	1269	2168	2375	2604	1440	6335	5075	4865	2564	91	127	125	64	90	97	111	65	168	117	110	47	5.62807	3.21036	4.37708	4.84515	3.3116	3.28834	4.49089	3.47549	0.00927947	9.77114e-05	6.0892e-05	1.94189e-05
tca-mir-124-5p	329	16503	1908	3281	3028	1269	2168	2375	2604	1440	6335	5075	4865	2564	52	81	77	37	65	56	62	39	103	77	72	28	2.112	1.85365	2.08692	2.11328	3.59304	1.12068	1.25527	1.69691	0.00180608	0.000762112	0.00047111	4.36771e-05
tca-mir-125-3p	307	16503	1908	3281	3028	1269	2168	2375	2604	1440	6335	5075	4865	2564	46	70	64	29	51	46	60	32	108	82	80	35	1.56844	1.05723	0.94626	0.983109	1.50107	0.461084	1.50772	0.908847	0.0623944	0.030211	0.0468087	0.0100898
tca-mir-125-5p	138	16503	1908	3281	3028	1269	2168	2375	2604	1440	6335	5075	4865	2564	18	34	29	16	38	33	38	26	43	33	35	20	0.615455	1.16645	0.752087	1.44486	5.72483	3.02011	3.86655	4.27874	0.0206911	0.0206962	0.078726	0.238262
tca-mir-133-3p	256	16503	1908	3281	3028	1269	2168	2375	2604	1440	6335	5075	4865	2564	43	60	58	26	69	55	53	33	72	53	57	17	2.34135	1.1735	1.48225	1.23354	9.05049	3.12837	1.85323	2.04549	0.00014551	8.10927e-05	0.00243043	4.63402e-06
tca-mir-133-5p	176	16503	1908	3281	3028	1269	2168	2375	2604	1440	6335	5075	4865	2564	25	37	34	19	37	38	44	27	60	47	45	20	0.945864	0.506081	0.485549	1.29474	2.9086	2.4607	3.27831	2.8703	0.0631293	0.0644285	0.0674993	0.0324505
tca-mir-137-3p	1130	16503	1908	3281	3028	1269	2168	2375	2604	1440	6335	5075	4865	2564	188	297	262	127	209	216	247	135	351	266	250	103	7.25564	7.59464	5.02012	5.36838	7.29617	5.60021	8.00908	4.24679	2.78975e-08	6.86391e-09	2.22622e-09	1.55126e-11
tca-mir-137-5p	272	16503	1908	3281	3028	1269	2168	2375	2604	1440	6335	5075	4865	2564	35	65	54	21	62	65	64	44	78	64	55	23	0.664811	1.37178	0.634995	0.361994	5.42595	5.03117	3.53231	4.66842	0.000198801	0.00209603	0.000136842	0.000155384
tca-mir-13a-3p	1653	16503	1908	3281	3028	1269	2168	2375	2604	1440	6335	5075	4865	2564	372	552	490	262	281	288	342	190	476	348	323	126	15	15	15	15	6.06476	3.89244	8.02946	4.68424	0	0	0	0
tca-mir-13a-5p	380	16503	1908	3281	3028	1269	2168	2375	2604	1440	6335	5075	4865	2564	63	86	76	40	87	86	95	64	108	91	83	35	2.90609	1.10287	0.742095	1.76155	7.31569	5.31148	6.01078	7.00533	1.04959e-05	0.000788549	0.000188398	7.59765e-05
tca-mir-13b-3p	1653	16503	1908	3281	3028	1269	2168	2375	2604	1440	6335	5075	4865	2564	372	552	490	262	281	288	342	190	476	348	323	126	15	15	15	15	6.06476	3.89244	8.02946	4.68424	0	0	0	0
tca-mir-13b-5p	541	16503	1908	3281	3028	1269	2168	2375	2604	1440	6335	5075	4865	2564	84	135	125	57	106	114	114	61	168	117	125	48	2.71268	2.8477	2.71045	2.20932	5.14876	5.14186	3.42543	1.79801	7.87505e-05	3.97758e-07	0.000191345	1.03427e-06
tca-mir-14-3p	707	16503	1908	3281	3028	1269	2168	2375	2604	1440	6335	5075	4865	2564	117	191	171	82	143	154	181	104	227	166	160	73	4.6705	5.95584	4.52603	4.18182	7.54485	7.63362	11.6339	7.458	9.88248e-05	3.11259e-06	7.74482e-06	1.15547e-05
tca-mir-14-5p	72	16503	1908	3281	3028	1269	2168	2375	2604	1440	6335	5075	4865	2564	7	15	14	5	18	22	22	14	26	15	17	6	0.219939	0.451828	0.472094	0.317721	2.71782	3.9202	3.32052	2.92398	0.217907	0.0182209	0.079629	0.0248088
tca-mir-184-3p	186	16503	1908	3281	3028	1269	2168	2375	2604	1440	6335	5075	4865	2564	25	38	34	15	39	47	52	31	56	44	45	17	0.751866	0.41679	0.333539	0.446761	2.99493	4.55147	5.13409	3.81946	0.00483184	0.00852029	0.0285598	0.00314909
tca-mir-184-5p	343	16503	1908	3281	3028	1269	2168	2375	2604	1440	6335	5075	4865	2564	43	77	73	32	69	71	81	44	96	76	80	39	0.598407	0.98755	1.15324	0.969609	4.00822	3.28802	4.2959	2.42363	1.24031e-05	9.34334e-05	0.00260978	0.00706993
tca-mir-190-3p	129	16503	1908	3281	3028	1269	2168	2375	2604	1440	6335	5075	4865	2564	20	29	27	13	28	26	26	16	34	31	26	9	1.1792	0.70994	0.723034	0.920715	2.62756	1.56785	1.14361	1.24862	0.00114603	0.0252315	0.00469387	0.00116391
tca-mir-190-5p	664	16503	1908	3281	3028	1269	2168	2375	2604	1440	6335	5075	4865	2564	108	178	142	69	174	155	188	112	185	149	128	49	4.05772	5.37794	1.73046	2.37464	15	9.9166	15	11.6368	1.73231e-09	3.07608e-07	2.78773e-10	3.64763e-11
tca-mir-193-3p	200	16503	1908	3281	3028	1269	2168	2375	2604	1440	6335	5075	4865	2564	32	51	42	20	47	44	50	32	55	46	54	21	1.65188	1.68594	0.843243	1.04659	4.71202	2.88921	3.60163	3.56922	0.000325421	0.00395562	0.122071	0.0113392
tca-mir-210-3p	458	16503	1908	3281	3028	1269	2168	2375	2604	1440	6335	5075	4865	2564	76	122	111	48	89	87	99	56	148	108	105	42	3.35034	3.81324	3.24491	1.93563	4.32047	2.61442	3.47648	2.39962	0.00157002	0.000149364	0.00037606	1.49675e-05
tca-mir-210-5p	178	16503	1908	3281	3028	1269	2168	2375	2604	1440	6335	5075	4865	2564	20	37	29	13	36	33	45	26	65	53	52	25	0.304861	0.469295	0.138734	0.296346	2.54503	1.30831	3.44803	2.48724	0.175455	0.239396	0.306425	0.176449
tca-mir-219-3p	141	16503	1908	3281	3028	1269	2168	2375	2604	1440	6335	5075	4865	2564	11	25	21	8	36	31	34	22	41	32	37	17	0.0445558	0.155555	0.080994	0.116139	4.66403	2.28128	2.45505	2.60187	0.0056625	0.00926564	0.111836	0.0711634
tca-mir-219-5p	567	16503	1908	3281	3028	1269	2168	2375	2604	1440	6335	5075	4865	2564	86	143	121	60	124	119	136	78	172	146	121	59	2.46581	3.17545	1.54327	2.32788	8.71018	5.2433	7.04241	4.70478	1.23624e-05	0.00193979	2.32703e-06	9.0603e-05
tca-mir-252a-3p	227	16503	1908	3281	3028	1269	2168	2375	2604	1440	6335	5075	4865	2564	27	42	38	16	47	43	57	32	78	62	58	29	0.412015	0.176963	0.153432	0.235206	3.29623	1.64428	4.03379	2.60199	0.0540982	0.0678695	0.0494162	0.0669222
tca-mir-252a-5p	1218	16503	1908	3281	3028	1269	2168	2375	2604	1440	6335	5075	4865	2564	222	341	304	145	239	256	296	166	365	297	265	111	12.339	12.2803	9.02897	7.57122	10.8095	10.5654	15	8.90019	4.89636e-11	8.73745e-08	7.67654e-11	2.43493e-12
tca-mir-252b-3p	105	16503	1908	3281	3028	1269	2168	2375	2604	1440	6335	5075	4865	2564	12	17	15	7	22	15	25	11	30	31	23	10	0.355684	0.100192	0.0813864	0.248913	2.05968	0.352648	1.95236	0.690983	0.00993429	0.250818	0.023115	0.0230932
tca-mir-252b-5p	1035	16503	1908	3281	3028	1269	2168	2375	2604	1440	6335	5075	4865	2564	188	287	252	118	212	230	257	148	302	242	219	84	10.3661	9.89603	6.58886	5.32915	11.4264	12.0217	14.5929	9.43398	4.19622e-11	1.48425e-08	1.16965e-10	7.11674e-14
tca-mir-263a-3p	169	16503	1908	3281	3028	1269	2168	2375	2604	1440	6335	5075	4865	2564	22	32	27	13	36	36	38	23	54	46	47	19	0.633742	0.238736	0.122085	0.370278	2.96305	2.27396	2.094	1.92472	0.0215012	0.0862386	0.187502	0.0316916
tca-mir-263a-5p	479	16503	1908	3281	3028	1269	2168	2375	2604	1440	6335	5075	4865	2564	74	130	110	45	104	117	156	80	146	104	87	31	2.42319	4.40912	2.38495	1.16068	7.27544	8.90263	15	8.3466	6.57255e-05	2.04294e-06	2.51736e-09	2.92207e-10
tca-mir-263b-3p	458	16503	1908	3281	3028	1269	2168	2375	2604	1440	6335	5075	4865	2564	56	101	92	40	92	92	107	61	120	107	107	47	0.530125	0.9646	0.823486	0.762305	5.02499	3.53243	5.16851	3.47633	7.13058e-09	0.000100085	0.00077323	0.000259182
tca-mir-263b-5p	760	16503	1908	3281	3028	1269	2168	2375	2604	1440	6335	5075	4865	2564	114	182	161	73	158	157	195	98	224	174	160	70	2.8576	2.67991	1.73369	1.6901	9.14559	6.21925	12.583	4.50845	3.88094e-08	2.22966e-07	2.09848e-08	4.78812e-08
tca-mir-275-3p	291	16503	1908	3281	3028	1269	2168	2375	2604	1440	6335	5075	4865	2564	42	60	60	30	67	71	76	52	102	74	61	27	1.26526	0.464617	0.856221	1.39384	5.94972	5.756	5.75182	6.70694	0.0610653	0.0113906	0.000257505	0.000485076
tca-mir-275-5p	579	16503	1908	3281	3028	1269	2168	2375	2604	1440	6335	5075	4865	2564	79	138	133	56	107	105	124	69	180	149	134	53	1.29358	2.1258	2.73605	1.49673	4.07419	2.33174	3.96836	2.49772	5.08854e-05	0.00173319	0.000132416	1.31567e-06
tca-mir-276-3p	332	16503	1908	3281	3028	1269	2168	2375	2604	1440	6335	5075	4865	2564	59	81	74	36	72	86	90	53	90	68	76	30	3.54908	1.75783	1.55151	1.83956	5.30192	8.04664	7.44293	5.2497	3.61162e-06	6.37523e-06	0.00174198	0.000133164
tca-mir-276-5p	87	16503	1908	3281	3028	1269	2168	2375	2604	1440	6335	5075	4865	2564	17	18	15	9	18	18	21	9	26	20	18	8	2.00938	0.438907	0.267886	0.885034	1.77922	1.41032	1.8361	0.645998	0.0277946	0.031458	0.0189252	0.0276207
tca-mir-2765-3p	130	16503	1908	3281	3028	1269	2168	2375	2604	1440	6335	5075	4865	2564	21	29	27	12	27	30	29	16	29	28	28	14	1.36974	0.682318	0.696377	0.699939	2.28062	2.56808	1.73555	1.22285	2.84444e-05	0.00539644	0.0115953	0.035475
tca-mir-2765-5p	388	16503	1908	3281	3028	1269	2168	2375	2604	1440	6335	5075	4865	2564	61	91	80	38	86	86	98	62	115	101	94	42	2.29459	1.46526	0.960661	1.28854	6.58045	4.93795	6.39261	5.99323	7.22467e-05	0.00985601	0.00502694	0.00191607
tca-mir-277-3p	1082	16503	1908	3281	3028	1269	2168	2375	2604	1440	6335	5075	4865	2564	181	287	260	124	181	187	221	123	359	256	245	104	7.17776	7.76476	6.26964	5.68171	3.72274	2.57659	4.9583	3.05884	5.88937e-05	2.37006e-08	4.69317e-08	1.16618e-09
tca-mir-2788-3p	223	16503	1908	3281	3028	1269	2168	2375	2604	1440	6335	5075	4865	2564	31	52	44	15	40	44	50	28	63	43	46	17	0.93603	1.06577	0.580538	0.186542	1.80831	1.96481	2.47648	1.71009	0.000391994	3.0164e-05	0.000737163	0.0001237
tca-mir-2788-5p	228	16503	1908	3281	3028	1269	2168	2375	2604	1440	6335	5075	4865	2564	37	49	37	18	49	48	48	33	60	55	55	25	1.88822	0.619203	0.113519	0.406877	3.80532	2.64528	1.87641	2.85137	3.21424e-05	0.00693991	0.0183703	0.0131459
tca-mir-2796-3p	158	16503	1908	3281	3028	1269	2168	2375	2604	1440	6335	5075	4865	2564	24	44	37	17	39	36	43	26	44	29	30	10	1.19292	2.23864	1.36871	1.22065	4.59403	2.7999	4.11493	3.27115	0.00149056	0.000121944	0.000755818	0.000145029
tca-mir-2796-5p	211	16503	1908	3281	3028	1269	2168	2375	2604	1440	6335	5075	4865	2564	33	43	31	17	47	46	43	35	48	47	48	19	1.54897	0.411299	0.0437526	0.445865	4.08373	2.8937	1.53158	4.14117	3.57587e-07	0.00161973	0.00742277	0.00156603
tca-mir-279a-3p	547	16503	1908	3281	3028	1269	2168	2375	2604	1440	6335	5075	4865	2564	153	206	172	111	100	96	121	67	141	105	103	38	15	15	13.714	15	3.68066	1.80748	4.53503	2.74001	7.13253e-11	1.60545e-10	2.1221e-09	2.12551e-10
tca-mir-279a-5p	194	16503	1908	3281	3028	1269	2168	2375	2604	1440	6335	5075	4865	2564	24	40	32	16	54	47	55	35	51	44	38	17	0.505541	0.446545	0.146432	0.49074	7.8479	4.05606	5.57647	4.94931	0.000104112	0.00332238	0.000476409	0.00163835
tca-mir-279b-3p	547	16503	1908	3281	3028	1269	2168	2375	2604	1440	6335	5075	4865	2564	153	206	172	111	100	96	121	67	141	105	103	38	15	15	13.714	15	3.68066	1.80748	4.53503	2.74001	7.13253e-11	1.60545e-10	2.1221e-09	2.12551e-10
tca-mir-279b-5p	158	16503	1908	3281	3028	1269	2168	2375	2604	1440	6335	5075	4865	2564	23	43	33	16	40	38	44	29	35	30	29	13	1.00647	2.01706	0.757041	1.00103	4.96956	3.39183	4.45311	4.42469	3.96436e-06	0.000243429	0.000400544	0.00204187
tca-mir-279c-3p	547	16503	1908	3281	3028	1269	2168	2375	2604	1440	6335	5075	4865	2564	153	206	172	111	100	96	121	67	141	105	103	38	15	15	13.714	15	3.68066	1.80748	4.53503	2.74001	7.13253e-11	1.60545e-10	2.1221e-09	2.12551e-10
tca-mir-279c-5p	198	16503	1908	3281	3028	1269	2168	2375	2604	1440	6335	5075	4865	2564	19	35	31	9	47	43	52	28	59	51	51	24	0.11221	0.123373	0.0899994	0.0244422	4.83473	2.72617	4.30918	2.403	0.00302496	0.0320818	0.0656329	0.0485078
tca-mir-279d-3p	547	16503	1908	3281	3028	1269	2168	2375	2604	1440	6335	5075	4865	2564	153	206	172	111	100	96	121	67	141	105	103	38	15	15	13.714	15	3.68066	1.80748	4.53503	2.74001	7.13253e-11	1.60545e-10	2.1221e-09	2.12551e-10
tca-mir-279d-5p	217	16503	1908	3281	3028	1269	2168	2375	2604	1440	6335	5075	4865	2564	26	43	35	17	39	40	40	21	65	57	57	25	0.429092	0.328884	0.110899	0.393345	1.79477	1.40773	0.914966	0.5838	0.00244545	0.0382965	0.0789424	0.0253007
tca-mir-279e-3p	547	16503	1908	3281	3028	1269	2168	2375	2604	1440	6335	5075	4865	2564	153	206	172	111	100	96	121	67	141	105	103	38	15	15	13.714	15	3.68066	1.80748	4.53503	2.74001	7.13253e-11	1.60545e-10	2.1221e-09	2.12551e-10
tca-mir-279e-5p	217	16503	1908	3281	3028	1269	2168	2375	2604	1440	6335	5075	4865	2564	29	45	39	19	55	54	66	41	72	54	46	24	0.764618	0.47091	0.288221	0.638293	6.45783	4.8729	7.77724	6.16545	0.0285299	0.014675	0.00156128	0.0163081
tca-mir-281-3p	503	16503	1908	3281	3028	1269	2168	2375	2604	1440	6335	5075	4865	2564	72	127	131	53	96	98	112	65	154	96	88	37	1.62671	2.92375	5.25353	2.10638	4.27694	3.22507	4.38535	3.28353	5.87703e-05	5.75336e-10	1.05181e-10	6.86693e-09
tca-mir-281-5p	248	16503	1908	3281	3028	1269	2168	2375	2604	1440	6335	5075	4865	2564	55	73	64	35	42	38	48	27	78	65	67	27	6.25345	3.97017	2.89171	3.78641	1.47306	0.524433	1.27463	1.02145	0.0057815	0.0297677	0.106054	0.00968275
tca-mir-282-3p	162	16503	1908	3281	3028	1269	2168	2375	2604	1440	6335	5075	4865	2564	21	41	31	9	32	33	45	26	49	32	35	16	0.616605	1.44307	0.453687	0.0930027	2.19366	1.85643	4.50147	3.09848	0.0081408	0.000465155	0.00654967	0.0108152
tca-mir-282-5p	136	16503	1908	3281	3028	1269	2168	2375	2604	1440	6335	5075	4865	2564	29	36	31	18	27	27	28	17	39	34	29	11	3.46388	1.62709	1.12064	2.09456	2.00662	1.52107	1.28212	1.30991	0.00487882	0.0381479	0.00894147	0.00321857
tca-mir-283-3p	794	16503	1908	3281	3028	1269	2168	2375	2604	1440	6335	5075	4865	2564	133	215	180	88	149	153	168	96	247	178	191	76	5.48352	6.69353	3.15378	3.72683	5.75587	4.34724	4.79025	3.39916	3.09736e-06	2.27994e-08	0.000119828	1.41129e-07
tca-mir-283-5p	1401	16503	1908	3281	3028	1269	2168	2375	2604	1440	6335	5075	4865	2564	285	439	385	191	244	252	285	158	408	295	302	117	15	15	15	15	6.14756	4.39026	6.07296	3.58338	9.30576e-15	0	7.67508e-13	4.82164e-17
tca-mir-29-3p	312	16503	1908	3281	3028	1269	2168	2375	2604	1440	6335	5075	4865	2564	58	81	70	34	56	55	58	32	90	80	78	27	4.04835	2.46978	1.5612	1.80849	2.23728	1.34496	1.12233	0.844112	0.000101067	0.0116367	0.0195333	9.00909e-05
tca-mir-29-5p	793	16503	1908	3281	3028	1269	2168	2375	2604	1440	6335	5075	4865	2564	105	191	179	70	144	155	175	104	258	162	178	77	1.22191	2.90185	3.04778	1.00652	4.80228	4.73015	6.13925	5.05532	0.000113633	6.43809e-12	1.3535e-06	2.71046e-07
tca-mir-2944a-3p	1653	16503	1908	3281	3028	1269	2168	2375	2604	1440	6335	5075	4865	2564	372	552	490	262	281	288	342	190	476	348	323	126	15	15	15	15	6.06476	3.89244	8.02946	4.68424	0	0	0	0
tca-mir-2944a-5p	332	16503	1908	3281	3028	1269	2168	2375	2604	1440	6335	5075	4865	2564	59	81	74	36	72	86	90	53	90	68	76	30	3.54908	1.75783	1.55151	1.83956	5.30192	8.04664	7.44293	5.2497	3.61162e-06	6.37523e-06	0.00174198	0.000133164
tca-mir-2944b-3p	1653	16503	1908	3281	3028	1269	2168	2375	2604	1440	6335	5075	4865	2564	372	552	490	262	281	288	342	190	476	348	323	126	15	15	15	15	6.06476	3.89244	8.02946	4.68424	0	0	0	0
tca-mir-2944b-5p	504	16503	1908	3281	3028	1269	2168	2375	2604	1440	6335	5075	4865	2564	74	135	120	51	91	96	112	55	174	109	111	50	1.89262	4.25406	3.12887	1.74014	3.23708	2.84513	4.3468	1.44757	0.0168925	9.35918e-07	3.50647e-05	5.63491e-05
tca-mir-2944c-3p	1653	16503	1908	3281	3028	1269	2168	2375	2604	1440	6335	5075	4865	2564	372	552	490	262	281	288	342	190	476	348	323	126	15	15	15	15	6.06476	3.89244	8.02946	4.68424	0	0	0	0
tca-mir-2944c-5p	504	16503	1908	3281	3028	1269	2168	2375	2604	1440	6335	5075	4865	2564	74	135	120	51	91	96	112	55	174	109	111	50	1.89262	4.25406	3.12887	1.74014	3.23708	2.84513	4.3468	1.44757	0.0168925	9.35918e-07	3.50647e-05	5.63491e-05
tca-mir-2a-3p	1653	16503	1908	3281	3028	1269	2168	2375	2604	1440	6335	5075	4865	2564	372	552	490	262	281	288	342	190	476	348	323	126	15	15	15	15	6.06476	3.89244	8.02946	4.68424	0	0	0	0
tca-mir-2a-5p	187	16503	1908	3281	3028	1269	2168	2375	2604	1440	6335	5075	4865	2564	27	41	34	18	37	41	37	22	56	47	55	23	1.03932	0.675822	0.320694	0.88846	2.42098	2.72105	1.2451	1.2311	0.00418573	0.0238584	0.326322	0.0595649
tca-mir-2b-3p	1653	16503	1908	3281	3028	1269	2168	2375	2604	1440	6335	5075	4865	2564	372	552	490	262	281	288	342	190	476	348	323	126	15	15	15	15	6.06476	3.89244	8.02946	4.68424	0	0	0	0
tca-mir-2b-5p	270	16503	1908	3281	3028	1269	2168	2375	2604	1440	6335	5075	4865	2564	35	59	53	22	58	53	64	41	83	60	62	31	0.691967	0.73382	0.581866	0.475157	4.32805	2.16481	3.62758	3.78015	0.00219475	0.000457031	0.00415475	0.0153174
tca-mir-2c-3p	427	16503	1908	3281	3028	1269	2168	2375	2604	1440	6335	5075	4865	2564	84	113	106	55	77	74	93	50	120	95	90	36	6.51044	3.47337	3.53571	4.24285	2.84446	1.43507	3.43085	1.87609	1.74788e-06	2.00514e-05	1.94366e-05	3.2488e-06
tca-mir-2c-5p	1048	16503	1908	3281	3028	1269	2168	2375	2604	1440	6335	5075	4865	2564	174	275	257	126	185	194	214	124	331	242	240	98	6.69663	7.00491	6.99006	6.89131	5.16444	4.22735	4.81398	3.77595	5.62291e-07	3.41558e-09	2.10632e-07	4.06462e-10
tca-mir-3049-3p	146	16503	1908	3281	3028	1269	2168	2375	2604	1440	6335	5075	4865	2564	17	32	25	10	35	29	34	21	48	36	34	15	0.373201	0.635058	0.221176	0.241645	3.94597	1.58267	2.19898	2.09638	0.0446575	0.0282846	0.0256628	0.0196888
tca-mir-3049-5p	158	16503	1908	3281	3028	1269	2168	2375	2604	1440	6335	5075	4865	2564	20	35	33	12	34	33	44	25	51	36	35	10	0.551193	0.689134	0.757041	0.354778	2.92902	2.01896	4.45311	2.92248	0.0292262	0.00711923	0.0104702	0.000145029
tca-mir-305-3p	209	16503	1908	3281	3028	1269	2168	2375	2604	1440	6335	5075	4865	2564	28	40	33	17	46	41	49	28	59	51	48	19	0.76547	0.247009	0.0930281	0.46461	3.88499	1.84076	2.87082	2.07356	0.000546598	0.0110969	0.00913283	0.00183881
tca-mir-305-5p	1214	16503	1908	3281	3028	1269	2168	2375	2604	1440	6335	5075	4865	2564	220	329	290	146	233	237	295	159	380	295	266	115	11.9692	9.98216	6.67998	7.90748	9.58602	6.84118	15	7.34139	2.41228e-08	6.36477e-08	1.8783e-10	4.14428e-11
tca-mir-307-3p	666	16503	1908	3281	3028	1269	2168	2375	2604	1440	6335	5075	4865	2564	131	194	162	83	109	115	137	67	196	155	152	52	9.66782	8.68387	4.46596	5.38478	2.21964	1.82521	3.47854	1.01733	2.16831e-07	3.2846e-06	2.19875e-05	3.72915e-10
tca-mir-307-5p	302	16503	1908	3281	3028	1269	2168	2375	2604	1440	6335	5075	4865	2564	42	65	61	27	56	58	59	33	97	78	74	31	1.06094	0.673702	0.745312	0.758691	2.54886	2.09106	1.49066	1.12866	0.00576299	0.0149094	0.0134589	0.00214415
tca-mir-308-3p	1653	16503	1908	3281	3028	1269	2168	2375	2604	1440	6335	5075	4865	2564	372	552	490	262	281	288	342	190	476	348	323	126	15	15	15	15	6.06476	3.89244	8.02946	4.68424	0	0	0	0
tca-mir-308-5p	173	16503	1908	3281	3028	1269	2168	2375	2604	1440	6335	5075	4865	2564	23	46	38	19	45	41	45	33	42	28	25	8	0.701498	1.91122	1.03009	1.35953	5.80919	3.44057	3.75207	5.26666	2.37533e-05	3.39415e-06	1.16566e-06	2.43086e-06
tca-mir-309a-3p	231	16503	1908	3281	3028	1269	2168	2375	2604	1440	6335	5075	4865	2564	64	73	50	32	45	43	57	27	60	50	47	14	11.3982	5.12149	1.07274	3.39414	2.62337	1.52655	3.81232	1.32601	1.80912e-05	0.000526125	0.000438646	3.22345e-06
tca-mir-309a-5p	485	16503	1908	3281	3028	1269	2168	2375	2604	1440	6335	5075	4865	2564	47	105	102	30	101	96	100	63	165	126	104	46	0.048833	0.831254	1.25391	0.0544552	6.17515	3.41736	2.77649	3.26723	0.0107231	0.00481505	1.38174e-05	2.24693e-05
tca-mir-309b-3p	231	16503	1908	3281	3028	1269	2168	2375	2604	1440	6335	5075	4865	2564	64	73	50	32	45	43	57	27	60	50	47	14	11.3982	5.12149	1.07274	3.39414	2.62337	1.52655	3.81232	1.32601	1.80912e-05	0.000526125	0.000438646	3.22345e-06
tca-mir-309b-5p	431	16503	1908	3281	3028	1269	2168	2375	2604	1440	6335	5075	4865	2564	79	122	112	56	91	84	89	55	120	88	89	34	4.95334	5.10052	4.56951	4.41079	5.91899	2.88059	2.57388	2.77738	8.99872e-07	3.03112e-07	7.27432e-06	5.02476e-07
tca-mir-31-5p	305	16503	1908	3281	3028	1269	2168	2375	2604	1440	6335	5075	4865	2564	50	76	65	35	51	50	65	35	99	69	71	28	2.37154	1.90644	1.10108	2.1751	1.54791	0.857219	2.40387	1.41288	0.00770106	0.000394308	0.00381187	0.000307678
tca-mir-315-3p	439	16503	1908	3281	3028	1269	2168	2375	2604	1440	6335	5075	4865	2564	42	75	64	23	98	92	114	60	141	120	109	44	0.0475591	0.0337764	0.00889813	0.0117003	7.53178	4.21912	8.00189	3.7371	0.00144529	0.0283107	0.00709584	0.000192866
tca-mir-315-5p	1419	16503	1908	3281	3028	1269	2168	2375	2604	1440	6335	5075	4865	2564	196	357	310	131	281	270	295	181	430	327	328	133	2.53734	6.7913	3.68002	1.95117	13.1852	6.68851	7.17403	7.43866	8.10426e-12	4.23735e-12	5.097e-09	3.65818e-13
tca-mir-316-3p	209	16503	1908	3281	3028	1269	2168	2375	2604	1440	6335	5075	4865	2564	20	36	30	13	51	46	54	31	60	62	52	24	0.10536	0.0915798	0.0343266	0.129185	5.53322	2.98549	4.22695	2.90837	0.000886685	0.220451	0.0364366	0.026274
tca-mir-316-5p	770	16503	1908	3281	3028	1269	2168	2375	2604	1440	6335	5075	4865	2564	102	184	164	66	169	173	197	117	258	185	170	83	1.20747	2.65818	1.83621	0.806286	11.7399	9.568	12.5782	9.14715	0.000996393	6.12568e-06	5.91916e-07	2.69866e-05
tca-mir-317-3p	602	16503	1908	3281	3028	1269	2168	2375	2604	1440	6335	5075	4865	2564	103	151	133	74	119	117	149	76	195	149	122	47	4.81329	3.2003	2.11428	4.68276	5.87858	3.65446	8.60563	3.39003	0.000468368	0.000240205	4.92729e-08	2.47531e-09
tca-mir-317-5p	91	16503	1908	3281	3028	1269	2168	2375	2604	1440	6335	5075	4865	2564	12	23	19	10	14	13	28	8	27	19	17	7	0.60218	1.09454	0.658247	1.04955	0.677977	0.358389	4.0087	0.39948	0.0233423	0.0104377	0.00574323	0.00894509
tca-mir-33-3p	276	16503	1908	3281	3028	1269	2168	2375	2604	1440	6335	5075	4865	2564	30	61	58	22	56	57	62	37	91	61	51	24	0.22405	0.804969	0.957652	0.426232	3.51727	2.77893	2.89651	2.48335	0.0153499	0.000344847	7.45682e-06	0.000224643
tca-mir-33-5p	614	16503	1908	3281	3028	1269	2168	2375	2604	1440	6335	5075	4865	2564	73	118	111	47	143	144	166	93	193	161	139	64	0.433957	0.193525	0.263689	0.323907	12.0551	9.4166	12.8591	7.36158	6.62583e-05	0.00299827	2.78126e-05	5.27072e-05
tca-mir-34-3p	200	16503	1908	3281	3028	1269	2168	2375	2604	1440	6335	5075	4865	2564	27	55	45	12	43	42	49	31	52	42	45	16	0.78392	2.46684	1.25364	0.110971	3.45588	2.3966	3.32708	3.23887	5.95837e-05	0.000548338	0.00705687	0.000465761
tca-mir-34-5p	411	16503	1908	3281	3028	1269	2168	2375	2604	1440	6335	5075	4865	2564	50	84	74	29	102	105	139	77	118	87	82	27	0.501156	0.44411	0.266233	0.19018	10.5145	9.23838	15	10.4702	8.69815e-06	3.0103e-06	2.52489e-06	7.32147e-09
tca-mir-3477-3p	264	16503	1908	3281	3028	1269	2168	2375	2604	1440	6335	5075	4865	2564	51	82	69	36	46	45	56	30	91	63	59	26	4.10725	5.30588	3.21599	3.56356	1.74933	1.02454	2.13414	1.26049	0.0477321	0.00335606	0.00235437	0.00199051
tca-mir-3477-5p	583	16503	1908	3281	3028	1269	2168	2375	2604	1440	6335	5075	4865	2564	101	163	151	71	107	101	117	67	180	135	124	53	4.96863	6.16243	5.77965	4.39375	3.95168	1.71887	2.68379	2.085	3.09983e-05	9.07801e-06	1.41797e-06	9.62614e-07
tca-mir-375-3p	663	16503	1908	3281	3028	1269	2168	2375	2604	1440	6335	5075	4865	2564	92	158	138	62	140	135	165	94	204	139	140	51	1.56859	2.33229	1.35802	1.33326	8.6492	5.11736	9.6397	6.07791	7.84539e-06	2.3538e-09	1.87183e-07	2.18199e-10
tca-mir-375-5p	235	16503	1908	3281	3028	1269	2168	2375	2604	1440	6335	5075	4865	2564	36	57	46	24	58	48	53	35	66	56	55	19	1.5015	1.39169	0.554281	1.212	6.32908	2.37017	2.63449	3.20135	0.000238625	0.00485192	0.00958294	0.000202337
tca-mir-3791-3p	97	16503	1908	3281	3028	1269	2168	2375	2604	1440	6335	5075	4865	2564	12	19	17	8	27	26	28	20	21	20	16	7	0.482787	0.329737	0.283807	0.482771	4.4753	3.37796	3.47282	4.11371	0.00013865	0.0075325	0.00101498	0.00491806
tca-mir-3791-5p	284	16503	1908	3281	3028	1269	2168	2375	2604	1440	6335	5075	4865	2564	34	60	55	21	55	49	63	35	98	75	68	26	0.432086	0.569596	0.528602	0.285619	2.95805	1.13468	2.78638	1.83037	0.0443719	0.0272891	0.00935019	0.000444641
tca-mir-3803-3p	337	16503	1908	3281	3028	1269	2168	2375	2604	1440	6335	5075	4865	2564	51	76	69	36	76	77	79	53	93	76	87	34	1.7386	1.01531	0.859139	1.74642	6.23576	5.00887	4.09682	5.05583	7.41083e-06	0.000195945	0.0338954	0.00097551
tca-mir-3804a-5p	397	16503	1908	3281	3028	1269	2168	2375	2604	1440	6335	5075	4865	2564	62	107	93	43	94	76	106	56	121	94	85	37	2.2546	3.65057	2.37985	2.04394	8.61176	2.4683	8.20175	3.90869	0.000232163	0.000418502	6.60421e-05	7.15999e-05
tca-mir-3804b-3p	339	16503	1908	3281	3028	1269	2168	2375	2604	1440	6335	5075	4865	2564	48	90	80	35	63	64	67	40	107	72	79	30	1.2337	2.97605	2.23508	1.51973	2.79177	2.06173	1.7044	1.69207	0.00214244	2.13024e-05	0.00266506	7.5979e-05
tca-mir-3804b-5p	205	16503	1908	3281	3028	1269	2168	2375	2604	1440	6335	5075	4865	2564	26	44	34	13	43	43	56	29	69	51	47	21	0.578995	0.598966	0.148949	0.144648	3.21454	2.42446	5.1147	2.46072	0.0415408	0.0165988	0.00932194	0.0080744
tca-mir-3805a-3p	506	16503	1908	3281	3028	1269	2168	2375	2604	1440	6335	5075	4865	2564	68	109	103	43	117	118	143	83	154	114	88	33	1.09021	0.804219	0.966851	0.666341	9.80319	7.71894	12.7893	8.2466	3.97305e-05	7.91251e-06	6.40215e-11	1.22317e-10
tca-mir-3805a-5p	146	16503	1908	3281	3028	1269	2168	2375	2604	1440	6335	5075	4865	2564	26	36	32	17	29	28	32	17	39	38	37	15	2.04498	1.20183	0.951795	1.50423	2.09855	1.3731	1.72716	1.07031	0.000840348	0.0573337	0.0737188	0.0196888
tca-mir-3805b-3p	585	16503	1908	3281	3028	1269	2168	2375	2604	1440	6335	5075	4865	2564	66	125	115	45	119	124	137	85	188	142	141	67	0.257037	0.780204	0.728892	0.337892	6.54833	5.65572	6.44338	6.01687	0.000350263	0.000109575	0.000797386	0.00108078
tca-mir-3806a-3p	433	16503	1908	3281	3028	1269	2168	2375	2604	1440	6335	5075	4865	2564	53	94	84	31	97	87	97	61	121	109	105	41	0.529258	0.817112	0.584912	0.207442	7.54406	3.38826	4.01263	4.16303	1.06562e-06	0.00245291	0.00356414	5.40495e-05
tca-mir-3806a-5p	470	16503	1908	3281	3028	1269	2168	2375	2604	1440	6335	5075	4865	2564	49	102	95	35	99	97	107	64	146	109	103	45	0.120426	0.840577	0.879675	0.271176	6.31032	4.13404	4.64977	3.88235	0.00020653	5.99228e-05	4.84898e-05	3.75836e-05
tca-mir-3807-3p	214	16503	1908	3281	3028	1269	2168	2375	2604	1440	6335	5075	4865	2564	34	49	41	22	48	51	57	35	63	56	49	16	1.66698	0.933592	0.468551	1.19148	4.23091	4.11946	4.82708	4.01172	0.00161065	0.0367335	0.00807493	0.000125901
tca-mir-3808-3p	1328	16503	1908	3281	3028	1269	2168	2375	2604	1440	6335	5075	4865	2564	224	308	269	131	318	327	359	215	370	309	307	108	9.1017	3.07037	1.53568	2.94905	15	15	15	15	0	7.53833e-11	1.59858e-08	0
tca-mir-3808-5p	323	16503	1908	3281	3028	1269	2168	2375	2604	1440	6335	5075	4865	2564	60	73	64	33	74	71	84	46	94	73	68	26	4.14712	1.01295	0.654145	1.4167	6.37901	4.11168	6.17236	3.46209	0.00011513	0.000273634	0.000152394	1.67331e-05
tca-mir-3809-5p	957	16503	1908	3281	3028	1269	2168	2375	2604	1440	6335	5075	4865	2564	150	240	224	102	181	182	220	124	306	216	192	81	4.47389	4.65411	4.66624	3.55832	7.08927	4.68614	9.13824	5.61728	5.46512e-06	1.78096e-09	2.71584e-12	7.66327e-12
tca-mir-3810-3p	479	16503	1908	3281	3028	1269	2168	2375	2604	1440	6335	5075	4865	2564	69	117	95	45	115	109	120	75	138	90	87	30	1.641	2.24556	0.743897	1.16068	10.7365	6.61828	7.40858	6.68553	2.30221e-06	5.53129e-10	2.51736e-09	1.05363e-10
tca-mir-3810-5p	535	16503	1908	3281	3028	1269	2168	2375	2604	1440	6335	5075	4865	2564	74	119	111	51	113	113	123	79	153	125	122	55	1.35857	1.12213	1.17613	1.32597	7.14531	5.15302	5.44137	5.93127	3.89087e-07	3.1083e-05	0.000113182	9.71125e-05
tca-mir-3811c-1-5p	288	16503	1908	3281	3028	1269	2168	2375	2604	1440	6335	5075	4865	2564	32	71	61	21	56	62	56	35	92	62	68	30	0.259684	1.72323	1.02874	0.263301	3.04002	3.44182	1.41358	1.74412	0.00566109	0.000118129	0.00650982	0.00324868
tca-mir-3811c-2-5p	288	16503	1908	3281	3028	1269	2168	2375	2604	1440	6335	5075	4865	2564	32	71	61	21	56	62	56	35	92	62	68	30	0.259684	1.72323	1.02874	0.263301	3.04002	3.44182	1.41358	1.74412	0.00566109	0.000118129	0.00650982	0.00324868
tca-mir-3811d-5p	483	16503	1908	3281	3028	1269	2168	2375	2604	1440	6335	5075	4865	2564	58	110	94	43	87	96	112	61	134	102	92	45	0.46207	1.31164	0.62039	0.866566	3.09605	3.48209	5.2101	2.88119	1.7352e-07	4.24817e-07	3.21735e-08	1.42566e-05
tca-mir-3811e-5p	439	16503	1908	3281	3028	1269	2168	2375	2604	1440	6335	5075	4865	2564	68	106	95	42	92	92	99	52	130	93	86	31	2.31441	1.95136	1.48341	1.22246	5.82701	4.21912	4.19542	2.01514	2.64791e-05	1.53634e-06	5.07049e-07	1.8238e-08
tca-mir-3812-3p	167	16503	1908	3281	3028	1269	2168	2375	2604	1440	6335	5075	4865	2564	17	38	34	10	36	32	32	20	52	41	52	23	0.179982	0.820864	0.664329	0.127333	3.0634	1.46498	1.01213	1.24679	0.0134384	0.0205562	0.543775	0.158637
tca-mir-3812-5p	586	16503	1908	3281	3028	1269	2168	2375	2604	1440	6335	5075	4865	2564	85	146	127	59	97	105	123	61	198	141	132	62	1.93873	2.98943	1.78586	1.86169	2.18865	2.17338	3.56192	1.19352	0.00465412	6.90984e-05	3.13718e-05	0.000117025
tca-mir-3813-3p	196	16503	1908	3281	3028	1269	2168	2375	2604	1440	6335	5075	4865	2564	24	40	37	17	36	44	53	28	69	48	51	23	0.479846	0.414445	0.419088	0.603078	1.85378	3.08068	4.75687	2.46748	0.096214	0.0138804	0.0763341	0.0363959
tca-mir-3813-5p	2017	16503	1908	3281	3028	1269	2168	2375	2604	1440	6335	5075	4865	2564	249	471	432	159	367	373	397	227	702	516	469	214	0.945345	4.73934	4.08934	0.463047	11.6762	7.64889	6.62578	4.8737	9.20533e-05	1.28571e-08	6.40183e-12	2.9236e-12
tca-mir-3814-3p	178	16503	1908	3281	3028	1269	2168	2375	2604	1440	6335	5075	4865	2564	21	46	45	17	44	39	43	22	55	34	41	14	0.39445	1.68879	2.10032	0.850258	5.06922	2.62413	2.89529	1.43405	0.00978428	0.000127759	0.0144231	0.000720578
tca-mir-3814-5p	2547	16503	1908	3281	3028	1269	2168	2375	2604	1440	6335	5075	4865	2564	396	664	594	262	453	461	509	292	826	606	598	242	10.7964	15	11.597	6.99857	12.912	8.1746	9.54304	6.97374	2.98426e-12	0	5.02415e-14	0
tca-mir-3815-3p	296	16503	1908	3281	3028	1269	2168	2375	2604	1440	6335	5075	4865	2564	42	80	69	25	50	49	53	34	94	66	63	28	1.16897	2.97349	1.90568	0.573541	1.60395	0.901406	0.860863	1.397	0.00432751	0.00029888	0.000365736	0.000612326
tca-mir-3815-5p	104	16503	1908	3281	3028	1269	2168	2375	2604	1440	6335	5075	4865	2564	13	23	20	8	24	29	30	18	29	17	20	7	0.503152	0.620997	0.454933	0.390493	2.75947	3.9898	3.64438	2.81678	0.00703614	0.000253448	0.00518556	0.00238159
tca-mir-3816-3p	202	16503	1908	3281	3028	1269	2168	2375	2604	1440	6335	5075	4865	2564	24	42	41	16	44	40	51	29	67	51	48	24	0.408983	0.476438	0.684718	0.413961	3.64864	1.8799	3.76975	2.55759	0.0319508	0.0221719	0.0182133	0.0390342
tca-mir-3816-5p	283	16503	1908	3281	3028	1269	2168	2375	2604	1440	6335	5075	4865	2564	48	64	55	30	59	61	73	41	81	65	61	25	2.60779	0.961566	0.543368	1.53544	3.99672	3.41544	5.35099	3.3367	0.00014342	0.000914155	0.000670461	0.000249956
tca-mir-3817-3p	1803	16503	1908	3281	3028	1269	2168	2375	2604	1440	6335	5075	4865	2564	270	454	413	184	347	359	396	236	561	408	403	171	5.85872	8.61711	7.00257	4.75651	14.4632	11.3809	13.0647	10.7634	2.53743e-12	1.44649e-16	1.62007e-13	5.78596e-16
tca-mir-3818-5p	499	16503	1908	3281	3028	1269	2168	2375	2604	1440	6335	5075	4865	2564	79	130	111	46	98	98	115	69	146	112	101	38	2.83331	3.56104	1.96409	1.06793	4.86727	3.34848	5.19378	4.33109	4.01059e-06	7.44706e-06	5.6163e-07	2.35433e-08
tca-mir-3820-5p	520	16503	1908	3281	3028	1269	2168	2375	2604	1440	6335	5075	4865	2564	69	137	124	43	91	95	109	59	166	111	105	47	1.01149	3.94526	3.23509	0.563028	2.79739	2.26884	3.22259	1.813	0.000471242	3.06351e-07	2.95005e-07	2.86733e-06
tca-mir-3821-3p	484	16503	1908	3281	3028	1269	2168	2375	2604	1440	6335	5075	4865	2564	71	132	109	49	102	94	113	58	144	117	100	41	1.83554	4.57333	2.10161	1.70254	6.48567	3.07896	5.3958	2.26881	1.50326e-05	0.000304136	2.30423e-06	9.20246e-07
tca-mir-3822-3p	3428	16503	1908	3281	3028	1269	2168	2375	2604	1440	6335	5075	4865	2564	437	774	695	301	576	606	677	372	1157	858	810	330	2.14474	5.30698	3.2685	2.45254	11.8518	9.16737	11.9951	6.26039	6.95324e-11	4.82164e-17	0	0
tca-mir-3824-3p	388	16503	1908	3281	3028	1269	2168	2375	2604	1440	6335	5075	4865	2564	44	104	92	29	79	78	93	51	114	83	79	36	0.288064	3.4762	2.52173	0.287834	4.65438	3.12873	5.07845	2.9139	4.71664e-05	8.51318e-06	1.0659e-05	7.66834e-05
tca-mir-3824-5p	1987	16503	1908	3281	3028	1269	2168	2375	2604	1440	6335	5075	4865	2564	314	515	457	216	362	375	433	254	633	476	482	206	9.26653	11.9451	7.97411	7.62872	11.5873	8.76135	13.7559	10.4996	2.87243e-11	2.45325e-13	8.07805e-09	3.72905e-13
tca-mir-3825-3p	85	16503	1908	3281	3028	1269	2168	2375	2604	1440	6335	5075	4865	2564	7	12	13	4	21	20	26	14	26	26	21	6	0.107399	0.0518193	0.145515	0.101182	2.93611	2.09554	3.74835	2.1957	0.0380343	0.337032	0.0965784	0.00680144
tca-mir-3825-5p	795	16503	1908	3281	3028	1269	2168	2375	2604	1440	6335	5075	4865	2564	105	181	163	74	152	157	180	104	240	180	178	82	1.1987	1.75675	1.29796	1.43289	6.35507	5.03527	7.09621	5.00747	2.0134e-07	5.00201e-08	1.09937e-06	3.48028e-06
tca-mir-3826-3p	159	16503	1908	3281	3028	1269	2168	2375	2604	1440	6335	5075	4865	2564	19	31	28	14	28	32	33	17	59	42	40	19	0.420946	0.300187	0.26218	0.617707	1.39066	1.74926	1.4345	0.81583	0.224025	0.0625302	0.0614754	0.0576008
tca-mir-3826-5p	106	16503	1908	3281	3028	1269	2168	2375	2604	1440	6335	5075	4865	2564	5	18	15	3	27	21	21	14	35	29	30	14	0.00556438	0.136576	0.0756791	0.0144675	3.7358	1.33329	0.98439	1.37914	0.070075	0.130272	0.253452	0.158719
tca-mir-3827-3p	384	16503	1908	3281	3028	1269	2168	2375	2604	1440	6335	5075	4865	2564	54	98	85	35	76	77	88	47	117	97	88	30	1.26346	2.57709	1.61258	0.903154	4.08074	3.06572	4.08271	2.1442	0.000279757	0.00424348	0.000934035	1.53308e-06
tca-mir-3827-5p	340	16503	1908	3281	3028	1269	2168	2375	2604	1440	6335	5075	4865	2564	47	80	84	32	61	66	81	44	119	86	63	31	1.08145	1.39382	2.9034	1.00705	2.3644	2.38739	4.43846	2.49586	0.0490494	0.00650058	9.13876e-07	0.000135082
tca-mir-3828-3p	295	16503	1908	3281	3028	1269	2168	2375	2604	1440	6335	5075	4865	2564	50	75	63	31	62	62	65	42	86	67	67	30	2.67576	2.10585	1.09968	1.51653	4.26212	3.153	2.77129	3.23503	0.000222236	0.000533899	0.00227788	0.00203638
tca-mir-3828-5p	280	16503	1908	3281	3028	1269	2168	2375	2604	1440	6335	5075	4865	2564	33	64	62	23	47	48	59	29	89	68	75	30	0.390201	1.03247	1.35483	0.496009	1.50569	1.08626	2.14419	0.853117	0.00533371	0.00421288	0.0841881	0.00542816
tca-mir-3829-5p	282	16503	1908	3281	3028	1269	2168	2375	2604	1440	6335	5075	4865	2564	39	63	58	25	56	53	65	32	83	76	64	26	1.00032	0.878613	0.831495	0.715666	3.27179	1.79594	3.31094	1.2934	0.000413161	0.0412393	0.00266539	0.000519656
tca-mir-3831-3p	331	16503	1908	3281	3028	1269	2168	2375	2604	1440	6335	5075	4865	2564	49	76	67	34	68	61	71	39	114	90	83	43	1.54007	1.15252	0.781084	1.46816	4.25644	1.78378	2.62923	1.65851	0.0338894	0.0391018	0.0184937	0.0508368
tca-mir-3832-3p	999	16503	1908	3281	3028	1269	2168	2375	2604	1440	6335	5075	4865	2564	147	241	214	97	194	206	233	141	330	245	216	97	3.11482	3.52655	2.31716	2.1591	8.47824	7.88353	10.2818	8.62801	7.26835e-05	1.88524e-06	2.0747e-09	8.75562e-09
tca-mir-3832-5p	293	16503	1908	3281	3028	1269	2168	2375	2604	1440	6335	5075	4865	2564	38	64	57	30	62	61	66	39	92	78	77	37	0.709642	0.750913	0.551317	1.36014	4.35448	3.00711	3.06324	2.51726	0.0031377	0.0304777	0.0579907	0.0426044
tca-mir-3833-3p	379	16503	1908	3281	3028	1269	2168	2375	2604	1440	6335	5075	4865	2564	63	100	92	40	90	84	89	59	95	77	78	24	2.93552	3.11885	2.84637	1.77884	8.3528	4.84284	4.53455	5.376	8.56796e-09	1.12818e-06	2.02278e-05	1.08619e-08
tca-mir-3833-5p	297	16503	1908	3281	3028	1269	2168	2375	2604	1440	6335	5075	4865	2564	46	62	56	32	54	55	73	40	105	69	67	26	1.80272	0.519171	0.425395	1.6809	2.30169	1.71578	4.56409	2.65504	0.0719766	0.00100523	0.00185299	0.000156531
tca-mir-3834-3p	198	16503	1908	3281	3028	1269	2168	2375	2604	1440	6335	5075	4865	2564	25	48	42	18	45	44	50	33	66	47	53	25	0.562654	1.2706	0.89226	0.727739	4.17209	2.98369	3.71619	4.00241	0.0363164	0.007602	0.110085	0.070007
tca-mir-3835-3p	276	16503	1908	3281	3028	1269	2168	2375	2604	1440	6335	5075	4865	2564	31	57	54	23	56	55	63	40	95	72	72	36	0.28263	0.468287	0.569937	0.531461	3.51727	2.35841	3.11788	3.28024	0.0435814	0.0223698	0.0546479	0.0663665
tca-mir-3835-5p	272	16503	1908	3281	3028	1269	2168	2375	2604	1440	6335	5075	4865	2564	44	60	47	28	59	61	70	40	91	68	64	30	2.0768	0.789476	0.191859	1.33952	4.51695	3.91335	5.13271	3.41218	0.022886	0.00918748	0.00712314	0.00886952
tca-mir-3836a-3p	231	16503	1908	3281	3028	1269	2168	2375	2604	1440	6335	5075	4865	2564	64	73	50	32	45	43	57	27	60	50	47	14	11.3982	5.12149	1.07274	3.39414	2.62337	1.52655	3.81232	1.32601	1.80912e-05	0.000526125	0.000438646	3.22345e-06
tca-mir-3836a-5p	159	16503	1908	3281	3028	1269	2168	2375	2604	1440	6335	5075	4865	2564	20	36	29	13	38	36	39	22	51	38	35	16	0.535902	0.784793	0.332769	0.47024	4.16809	2.74826	2.8383	1.9577	0.0258852	0.0150793	0.00933063	0.0134727
tca-mir-3836b-3p	231	16503	1908	3281	3028	1269	2168	2375	2604	1440	6335	5075	4865	2564	64	73	50	32	45	43	57	27	60	50	47	14	11.3982	5.12149	1.07274	3.39414	2.62337	1.52655	3.81232	1.32601	1.80912e-05	0.000526125	0.000438646	3.22345e-06
tca-mir-3836b-5p	212	16503	1908	3281	3028	1269	2168	2375	2604	1440	6335	5075	4865	2564	32	57	53	22	43	42	40	23	68	61	60	31	1.33437	2.29634	2.22903	1.22799	2.90018	1.93974	1.03133	0.947975	0.0143385	0.150148	0.210862	0.221594
tca-mir-3838-3p	515	16503	1908	3281	3028	1269	2168	2375	2604	1440	6335	5075	4865	2564	74	131	116	51	110	112	129	72	158	137	110	48	1.68835	3.12707	2.19381	1.58343	7.24532	5.73913	7.89458	4.64345	5.54831e-05	0.00896782	6.51625e-06	7.93454e-06
tca-mir-3838-5p	403	16503	1908	3281	3028	1269	2168	2375	2604	1440	6335	5075	4865	2564	55	112	97	43	77	81	87	49	114	83	73	36	1.08339	4.37677	2.83281	1.93521	3.61135	3.21525	3.13428	2.14883	4.65535e-06	1.04304e-06	3.58201e-08	2.36953e-05
tca-mir-3839-5p	434	16503	1908	3281	3028	1269	2168	2375	2604	1440	6335	5075	4865	2564	65	112	103	45	83	87	100	55	131	103	91	37	1.92366	3.01794	2.74598	1.78369	3.84147	3.35443	4.62396	2.70915	7.99492e-05	0.000273076	1.34363e-05	3.66759e-06
tca-mir-3840-3p	277	16503	1908	3281	3028	1269	2168	2375	2604	1440	6335	5075	4865	2564	75	92	75	46	47	57	67	36	76	48	58	20	12.5968	7.31944	3.93698	6.67655	1.58006	2.74096	4.03546	2.21672	3.19912e-05	9.00998e-08	0.000334031	8.88737e-06
tca-mir-3840-5p	104	16503	1908	3281	3028	1269	2168	2375	2604	1440	6335	5075	4865	2564	13	23	20	8	24	29	30	18	29	17	20	7	0.503152	0.620997	0.454933	0.390493	2.75947	3.9898	3.64438	2.81678	0.00703614	0.000253448	0.00518556	0.00238159
tca-mir-3841-3p	209	16503	1908	3281	3028	1269	2168	2375	2604	1440	6335	5075	4865	2564	62	69	51	34	30	34	50	22	63	41	41	15	12.5284	5.6354	1.96166	5.0081	0.584373	0.724241	3.12101	0.833177	0.00332772	7.88287e-05	0.000322732	8.59114e-05
tca-mir-3841-5p	200	16503	1908	3281	3028	1269	2168	2375	2604	1440	6335	5075	4865	2564	22	43	44	18	46	42	47	30	60	51	45	21	0.264243	0.602822	1.10643	0.701305	4.38046	2.3966	2.81086	2.92369	0.00345445	0.0267332	0.00705687	0.0113392
tca-mir-3842-3p	345	16503	1908	3281	3028	1269	2168	2375	2604	1440	6335	5075	4865	2564	53	78	66	34	71	71	83	50	102	86	78	32	1.89917	1.0461	0.491555	1.25162	4.43053	3.2132	4.69148	3.87641	0.00014528	0.00414033	0.00101319	0.000172236
tca-mir-3842-5p	240	16503	1908	3281	3028	1269	2168	2375	2604	1440	6335	5075	4865	2564	31	55	50	23	55	56	62	35	68	61	55	23	0.658513	0.983554	0.856117	0.952107	4.99641	4.15672	4.71007	3.03083	0.000281086	0.0176121	0.00583833	0.00202165
tca-mir-3843-3p	783	16503	1908	3281	3028	1269	2168	2375	2604	1440	6335	5075	4865	2564	159	232	195	104	151	155	178	102	225	175	177	71	12.7788	11.0429	5.94038	7.9733	6.55268	5.0395	7.15433	4.84777	1.86719e-09	2.21026e-08	2.5483e-06	1.49432e-08
tca-mir-3843-5p	690	16503	1908	3281	3028	1269	2168	2375	2604	1440	6335	5075	4865	2564	82	152	133	57	157	166	179	101	214	152	149	70	0.437259	1.16053	0.615174	0.593764	12.2754	11.7035	12.0528	7.15667	9.77684e-06	4.91844e-08	4.96789e-07	7.6281e-06
tca-mir-3849-3p	341	16503	1908	3281	3028	1269	2168	2375	2604	1440	6335	5075	4865	2564	40	70	70	29	76	70	84	46	109	84	69	31	0.377705	0.454485	0.880391	0.609926	6.0232	3.14785	5.15327	2.94273	0.00327815	0.00306943	2.58954e-05	0.00012489
tca-mir-3849-5p	707	16503	1908	3281	3028	1269	2168	2375	2604	1440	6335	5075	4865	2564	91	174	152	72	141	137	157	94	231	174	164	78	0.916218	3.15173	1.8859	2.23433	7.05926	4.08599	5.7515	4.88216	0.000317223	5.90275e-05	3.40971e-05	0.000118864
tca-mir-3850-3p	244	16503	1908	3281	3028	1269	2168	2375	2604	1440	6335	5075	4865	2564	30	45	45	19	63	52	61	39	70	58	53	19	0.501551	0.166009	0.351716	0.380283	7.57197	2.92072	4.19181	4.13004	0.000385454	0.00404096	0.00164253	8.91308e-05
tca-mir-3851a-1-3p	719	16503	1908	3281	3028	1269	2168	2375	2604	1440	6335	5075	4865	2564	151	209	171	96	154	138	165	96	193	164	154	56	13.4093	9.2122	4.10778	7.53016	9.91528	3.91256	6.9692	5.04573	7.7678e-12	3.48185e-07	1.66924e-07	6.8971e-11
tca-mir-3851a-1-5p	529	16503	1908	3281	3028	1269	2168	2375	2604	1440	6335	5075	4865	2564	61	114	105	38	117	112	114	73	159	135	121	48	0.323584	0.821191	0.776173	0.198059	8.56711	5.16457	3.82551	4.50291	1.2719e-05	0.00180465	0.000140396	2.69073e-06
tca-mir-3851a-2-3p	719	16503	1908	3281	3028	1269	2168	2375	2604	1440	6335	5075	4865	2564	151	209	171	96	154	138	165	96	193	164	154	56	13.4093	9.2122	4.10778	7.53016	9.91528	3.91256	6.9692	5.04573	7.7678e-12	3.48185e-07	1.66924e-07	6.8971e-11
tca-mir-3851a-2-5p	529	16503	1908	3281	3028	1269	2168	2375	2604	1440	6335	5075	4865	2564	61	114	105	38	117	112	114	73	159	135	121	48	0.323584	0.821191	0.776173	0.198059	8.56711	5.16457	3.82551	4.50291	1.2719e-05	0.00180465	0.000140396	2.69073e-06
tca-mir-3851b-3p	276	16503	1908	3281	3028	1269	2168	2375	2604	1440	6335	5075	4865	2564	77	96	71	48	47	51	74	34	76	46	50	15	13.6623	8.75974	3.0759	7.56981	1.60547	1.62549	6.09376	1.79684	3.80464e-05	2.20912e-08	3.88913e-06	5.94423e-08
tca-mir-3851b-5p	529	16503	1908	3281	3028	1269	2168	2375	2604	1440	6335	5075	4865	2564	61	114	105	38	117	112	114	73	159	135	121	48	0.323584	0.821191	0.776173	0.198059	8.56711	5.16457	3.82551	4.50291	1.2719e-05	0.00180465	0.000140396	2.69073e-06
tca-mir-3851c-3p	276	16503	1908	3281	3028	1269	2168	2375	2604	1440	6335	5075	4865	2564	77	96	71	48	47	51	74	34	76	46	50	15	13.6623	8.75974	3.0759	7.56981	1.60547	1.62549	6.09376	1.79684	3.80464e-05	2.20912e-08	3.88913e-06	5.94423e-08
tca-mir-3851c-5p	529	16503	1908	3281	3028	1269	2168	2375	2604	1440	6335	5075	4865	2564	61	114	105	38	117	112	114	73	159	135	121	48	0.323584	0.821191	0.776173	0.198059	8.56711	5.16457	3.82551	4.50291	1.2719e-05	0.00180465	0.000140396	2.69073e-06
tca-mir-3851d-3p	187	16503	1908	3281	3028	1269	2168	2375	2604	1440	6335	5075	4865	2564	23	40	33	14	37	42	43	27	53	44	49	21	0.489006	0.574264	0.256798	0.326543	2.42098	2.98508	2.45351	2.47623	0.00106448	0.00760861	0.087538	0.0260512
tca-mir-3851d-5p	276	16503	1908	3281	3028	1269	2168	2375	2604	1440	6335	5075	4865	2564	77	96	71	48	47	51	74	34	76	46	50	15	13.6623	8.75974	3.0759	7.56981	1.60547	1.62549	6.09376	1.79684	3.80464e-05	2.20912e-08	3.88913e-06	5.94423e-08
tca-mir-3851e-3p	276	16503	1908	3281	3028	1269	2168	2375	2604	1440	6335	5075	4865	2564	77	96	71	48	47	51	74	34	76	46	50	15	13.6623	8.75974	3.0759	7.56981	1.60547	1.62549	6.09376	1.79684	3.80464e-05	2.20912e-08	3.88913e-06	5.94423e-08
tca-mir-3851e-5p	134	16503	1908	3281	3028	1269	2168	2375	2604	1440	6335	5075	4865	2564	19	34	24	11	26	23	35	20	31	30	25	11	0.855945	1.32636	0.302421	0.475599	1.8338	0.826856	3.16055	2.21886	5.22688e-05	0.00872147	0.00124462	0.003861
tca-mir-3851f-3p	276	16503	1908	3281	3028	1269	2168	2375	2604	1440	6335	5075	4865	2564	77	96	71	48	47	51	74	34	76	46	50	15	13.6623	8.75974	3.0759	7.56981	1.60547	1.62549	6.09376	1.79684	3.80464e-05	2.20912e-08	3.88913e-06	5.94423e-08
tca-mir-3851f-5p	134	16503	1908	3281	3028	1269	2168	2375	2604	1440	6335	5075	4865	2564	19	34	24	11	26	23	35	20	31	30	25	11	0.855945	1.32636	0.302421	0.475599	1.8338	0.826856	3.16055	2.21886	5.22688e-05	0.00872147	0.00124462	0.003861
tca-mir-3853-3p	1929	16503	1908	3281	3028	1269	2168	2375	2604	1440	6335	5075	4865	2564	269	459	407	172	336	349	398	232	610	472	412	182	3.54329	5.5242	3.32294	1.81626	8.36739	6.166	9.17322	7.19633	1.26826e-11	2.3731e-11	0	4.82164e-17
tca-mir-3854-3p	186	16503	1908	3281	3028	1269	2168	2375	2604	1440	6335	5075	4865	2564	26	43	34	15	37	33	36	21	57	45	46	13	0.899123	0.937459	0.333539	0.446761	2.46231	1.08761	1.11333	1.05428	0.00723538	0.0127037	0.0396825	0.000140688
tca-mir-3854-5p	573	16503	1908	3281	3028	1269	2168	2375	2604	1440	6335	5075	4865	2564	92	147	120	57	97	101	123	63	182	129	130	52	3.37808	3.5928	1.32323	1.72578	2.47463	1.91766	3.98789	1.62343	0.000201805	2.15127e-06	5.39025e-05	1.1105e-06
tca-mir-3855-3p	158	16503	1908	3281	3028	1269	2168	2375	2604	1440	6335	5075	4865	2564	24	40	40	15	27	25	26	11	53	36	25	16	1.19292	1.42647	1.96312	0.804473	1.22533	0.58588	0.446914	0.134312	0.0551976	0.00711923	2.09658e-05	0.014482
tca-mir-3855-5p	336	16503	1908	3281	3028	1269	2168	2375	2604	1440	6335	5075	4865	2564	50	73	69	32	80	80	93	61	108	72	72	35	1.59485	0.752277	0.877906	1.05872	7.58741	5.90412	8.1447	7.95892	0.00417653	3.20289e-05	0.000211731	0.00174856
tca-mir-3857-5p	772	16503	1908	3281	3028	1269	2168	2375	2604	1440	6335	5075	4865	2564	109	185	190	74	140	139	164	87	235	189	165	60	1.94704	2.72678	5.45032	1.68576	4.65976	2.73314	4.79387	2.26337	6.28748e-07	2.09405e-05	5.24546e-08	1.26688e-11
tca-mir-3858a-1-3p	605	16503	1908	3281	3028	1269	2168	2375	2604	1440	6335	5075	4865	2564	74	137	121	42	124	126	138	83	196	150	132	61	0.561711	1.4137	0.881937	0.136693	6.97846	5.32758	5.80436	4.90777	0.000459518	0.000253577	4.11796e-06	2.05955e-05
tca-mir-3858a-1-5p	258	16503	1908	3281	3028	1269	2168	2375	2604	1440	6335	5075	4865	2564	28	62	58	22	54	62	69	41	87	54	47	25	0.226249	1.38176	1.42193	0.586632	3.78092	4.92462	5.70593	4.2331	0.0303061	0.000106113	8.98029e-06	0.00173328
tca-mir-3859-3p	1962	16503	1908	3281	3028	1269	2168	2375	2604	1440	6335	5075	4865	2564	296	508	457	199	352	378	428	240	643	456	439	179	6.69943	11.6978	8.74398	4.94234	10.3729	9.99805	13.6668	8.09382	9.73199e-09	1.06076e-15	1.43203e-14	0
tca-mir-3859-5p	167	16503	1908	3281	3028	1269	2168	2375	2604	1440	6335	5075	4865	2564	21	31	29	13	36	31	37	25	62	49	42	27	0.538391	0.205286	0.234385	0.388674	3.0634	1.27576	1.95441	2.57317	0.222487	0.208265	0.0577913	0.442112
tca-mir-3860-5p	264	16503	1908	3281	3028	1269	2168	2375	2604	1440	6335	5075	4865	2564	43	63	56	24	59	64	74	42	77	53	53	20	2.09914	1.33832	1.00067	0.786851	4.92885	5.18563	6.92694	4.32449	0.000432928	2.48012e-05	0.000135696	3.1142e-05
tca-mir-3861-5p	731	16503	1908	3281	3028	1269	2168	2375	2604	1440	6335	5075	4865	2564	108	177	174	74	128	143	157	84	239	194	180	81	2.52808	2.8478	4.18752	2.21427	3.63891	4.44006	4.88883	2.43247	0.00027144	0.00262154	0.000698432	0.000109177
tca-mir-3862-3p	299	16503	1908	3281	3028	1269	2168	2375	2604	1440	6335	5075	4865	2564	46	73	71	31	53	51	60	36	94	73	74	26	1.75384	1.65835	2.13217	1.44645	2.04967	1.08626	1.72461	1.71538	0.00303069	0.00384723	0.0171527	0.000132697
tca-mir-3862-5p	234	16503	1908	3281	3028	1269	2168	2375	2604	1440	6335	5075	4865	2564	30	55	50	21	37	41	52	30	92	65	51	29	0.628864	1.14512	0.99643	0.719985	1.0163	1.13022	2.45746	1.89841	0.447293	0.0854999	0.00211667	0.0476912
tca-mir-3864-3p	384	16503	1908	3281	3028	1269	2168	2375	2604	1440	6335	5075	4865	2564	43	87	74	27	69	70	89	43	123	101	94	44	0.259759	1.11805	0.535246	0.190762	2.59035	1.83762	4.30912	1.42536	0.00225777	0.0134203	0.00696621	0.00567276
tca-mir-3865-5p	305	16503	1908	3281	3028	1269	2168	2375	2604	1440	6335	5075	4865	2564	50	76	65	35	51	50	65	35	99	69	71	28	2.37154	1.90644	1.10108	2.1751	1.54791	0.857219	2.40387	1.41288	0.00770106	0.000394308	0.00381187	0.000307678
tca-mir-3866-5p	196	16503	1908	3281	3028	1269	2168	2375	2604	1440	6335	5075	4865	2564	38	53	40	24	44	44	55	32	52	35	40	17	3.32757	2.24359	0.702923	2.06812	3.967	3.08068	5.42599	3.73657	0.000127783	1.16737e-05	0.00109143	0.00138551
tca-mir-3867-5p	545	16503	1908	3281	3028	1269	2168	2375	2604	1440	6335	5075	4865	2564	101	152	135	69	92	90	117	59	177	127	124	55	6.32102	5.73462	4.23492	4.84457	2.34923	1.16008	3.83368	1.44616	0.000901432	2.32751e-05	8.94955e-05	4.99155e-05
tca-mir-3869-3p	419	16503	1908	3281	3028	1269	2168	2375	2604	1440	6335	5075	4865	2564	78	106	97	52	77	87	106	55	140	104	101	51	5.1563	2.59376	2.29266	3.64628	3.08503	3.88878	6.87712	3.06372	0.00815038	0.00172827	0.00331753	0.0126922
tca-mir-3872-5p	362	16503	1908	3281	3028	1269	2168	2375	2604	1440	6335	5075	4865	2564	47	77	66	28	72	85	99	51	117	82	86	39	0.761362	0.640198	0.30971	0.359631	3.98135	5.94499	8.3067	3.62482	0.0039179	0.000144359	0.00361775	0.00233415
tca-mir-3877-5p	199	16503	1908	3281	3028	1269	2168	2375	2604	1440	6335	5075	4865	2564	34	51	41	20	45	43	47	31	52	52	46	23	2.13058	1.7261	0.749066	1.06382	4.11597	2.68131	2.85945	3.27755	7.22849e-05	0.0400354	0.0116826	0.0306552
tca-mir-3880-3p	244	16503	1908	3281	3028	1269	2168	2375	2604	1440	6335	5075	4865	2564	31	55	49	22	63	62	64	43	76	45	45	20	0.603786	0.885725	0.670858	0.7425	7.57197	5.77463	5.06177	5.55982	0.00466628	3.51429e-06	2.13495e-05	0.000194407
tca-mir-3880-5p	213	16503	1908	3281	3028	1269	2168	2375	2604	1440	6335	5075	4865	2564	34	50	50	23	45	46	48	30	63	47	48	20	1.6951	1.08811	1.62729	1.41972	3.39467	2.8042	2.4555	2.48685	0.00186868	0.00125389	0.00600599	0.00253404
tca-mir-3881-3p	565	16503	1908	3281	3028	1269	2168	2375	2604	1440	6335	5075	4865	2564	72	134	131	49	111	117	125	71	174	115	119	50	0.774907	2.01092	2.86522	0.782783	5.40864	4.88589	4.66121	3.16233	3.39513e-05	4.6414e-09	1.15551e-06	5.65423e-07
tca-mir-3881-5p	361	16503	1908	3281	3028	1269	2168	2375	2604	1440	6335	5075	4865	2564	42	78	73	29	68	62	77	41	137	105	101	48	0.355006	0.734932	0.798833	0.449505	3.1113	1.23952	2.71448	1.47456	0.263358	0.133009	0.145471	0.0612463
tca-mir-3882-3p	341	16503	1908	3281	3028	1269	2168	2375	2604	1440	6335	5075	4865	2564	50	73	64	25	79	75	95	50	101	78	68	22	1.49053	0.666475	0.411967	0.261197	6.9608	4.30205	8.45683	4.00571	0.000169431	0.000296175	1.51312e-05	8.34537e-08
tca-mir-3882-5p	463	16503	1908	3281	3028	1269	2168	2375	2604	1440	6335	5075	4865	2564	75	121	103	49	93	90	101	60	146	99	102	46	3.00831	3.42669	1.87265	2.03713	5.0693	2.9934	3.68265	3.12434	0.000478225	1.35121e-06	6.82368e-05	0.00010896
tca-mir-3883-3p	1326	16503	1908	3281	3028	1269	2168	2375	2604	1440	6335	5075	4865	2564	215	362	326	149	273	272	293	181	400	289	264	107	7.29541	11.4086	8.86671	6.19453	15	10.0164	9.96162	9.72964	1.94796e-11	9.11289e-15	4.82164e-17	0
tca-mir-3883-5p	393	16503	1908	3281	3028	1269	2168	2375	2604	1440	6335	5075	4865	2564	55	89	84	38	81	77	90	52	118	100	85	34	1.24322	1.12666	1.27391	1.22039	4.95348	2.77075	4.14437	3.02062	0.000122841	0.00489907	0.000104776	1.38353e-05
tca-mir-3884-3p	102	16503	1908	3281	3028	1269	2168	2375	2604	1440	6335	5075	4865	2564	7	14	12	4	23	21	29	18	32	27	25	12	0.0384843	0.0318704	0.0222245	0.0452558	2.5408	1.49985	3.43599	2.92046	0.0389652	0.0990055	0.0755981	0.0864416
tca-mir-3884-5p	237	16503	1908	3281	3028	1269	2168	2375	2604	1440	6335	5075	4865	2564	33	62	62	26	42	42	46	28	65	50	59	24	0.965779	2.14393	2.98603	1.58825	1.77585	1.20686	1.26553	1.40101	0.000101384	0.000231523	0.0300011	0.00441878
tca-mir-3889-3p	209	16503	1908	3281	3028	1269	2168	2375	2604	1440	6335	5075	4865	2564	62	69	51	34	30	34	50	22	63	41	41	15	12.5284	5.6354	1.96166	5.0081	0.584373	0.724241	3.12101	0.833177	0.00332772	7.88287e-05	0.000322732	8.59114e-05
tca-mir-3889-5p	712	16503	1908	3281	3028	1269	2168	2375	2604	1440	6335	5075	4865	2564	133	196	177	86	130	142	162	90	196	174	136	51	8.28928	6.71398	5.40975	5.01004	4.52292	4.85075	6.60317	3.89012	1.37513e-10	3.67363e-05	3.11108e-11	1.87051e-12
tca-mir-3892-3p	1143	16503	1908	3281	3028	1269	2168	2375	2604	1440	6335	5075	4865	2564	168	282	242	102	205	213	237	134	357	267	262	104	3.44164	4.76766	2.27898	1.31263	6.15076	4.7688	5.77329	3.84661	4.64862e-08	2.44467e-09	6.76877e-08	1.04927e-11
tca-mir-3892-5p	109	16503	1908	3281	3028	1269	2168	2375	2604	1440	6335	5075	4865	2564	13	28	26	12	18	20	21	14	36	24	29	12	0.419984	1.27028	1.24307	1.12507	0.923446	1.01326	0.886921	1.28902	0.0682096	0.0121125	0.150583	0.0539274
tca-mir-3893-3p	783	16503	1908	3281	3028	1269	2168	2375	2604	1440	6335	5075	4865	2564	159	232	195	104	151	155	178	102	225	175	177	71	12.7788	11.0429	5.94038	7.9733	6.55268	5.0395	7.15433	4.84777	1.86719e-09	2.21026e-08	2.5483e-06	1.49432e-08
tca-mir-3893-5p	276	16503	1908	3281	3028	1269	2168	2375	2604	1440	6335	5075	4865	2564	27	61	59	20	71	73	81	50	80	54	53	22	0.0986422	0.804969	1.07368	0.257002	8.32536	7.38257	8.4843	6.68026	0.000268796	7.14978e-06	2.55705e-05	5.1574e-05
tca-mir-3897-5p	984	16503	1908	3281	3028	1269	2168	2375	2604	1440	6335	5075	4865	2564	129	226	206	81	175	186	220	120	313	237	230	94	1.26144	2.21405	1.83038	0.631737	5.11645	4.61305	8.0377	4.23135	2.45951e-06	4.80535e-07	2.55237e-06	4.57006e-09
tca-mir-3905-3p	357	16503	1908	3281	3028	1269	2168	2375	2604	1440	6335	5075	4865	2564	58	89	83	38	59	75	91	41	122	91	67	39	2.53428	2.11584	2.11522	1.77993	1.58902	3.63077	6.18906	1.54317	0.0241217	0.00694124	8.70996e-07	0.00315708
tca-mir-6007-3p	263	16503	1908	3281	3028	1269	2168	2375	2604	1440	6335	5075	4865	2564	27	50	43	15	59	59	60	41	80	50	44	19	0.149801	0.218807	0.110457	0.0620849	4.98244	3.81849	3.00326	4.03899	0.00175686	4.37764e-06	4.73568e-07	1.45313e-05
tca-mir-6007-5p	498	16503	1908	3281	3028	1269	2168	2375	2604	1440	6335	5075	4865	2564	73	114	101	52	87	96	116	63	177	111	116	51	1.86073	1.39289	0.92884	2.00647	2.68543	3.01769	5.46503	2.96814	0.0457966	5.3094e-06	0.000443075	0.000143699
tca-mir-6012-3p	160	16503	1908	3281	3028	1269	2168	2375	2604	1440	6335	5075	4865	2564	20	33	30	15	33	32	42	24	51	40	37	16	0.520959	0.441517	0.398439	0.772682	2.54595	1.71146	3.65832	2.51742	0.0228793	0.0292128	0.0194101	0.0125275
tca-mir-6012-5p	292	16503	1908	3281	3028	1269	2168	2375	2604	1440	6335	5075	4865	2564	39	66	62	26	50	56	63	34	90	77	89	36	0.838653	0.970508	1.05255	0.737258	1.70477	2.03206	2.48246	1.47066	0.00173365	0.0251885	0.486138	0.0320332
tca-mir-6016-3p	97	16503	1908	3281	3028	1269	2168	2375	2604	1440	6335	5075	4865	2564	15	26	26	13	24	24	22	18	29	24	17	12	1.04336	1.436	1.85284	1.7923	3.22712	2.65528	1.57458	3.19665	0.0227064	0.0547878	0.00215316	0.119074
tca-mir-6016-5p	529	16503	1908	3281	3028	1269	2168	2375	2604	1440	6335	5075	4865	2564	74	125	120	50	98	96	111	63	171	120	118	47	1.4521	1.87075	2.34926	1.25897	3.83952	2.20141	3.28458	2.33873	0.000820922	7.40651e-06	4.36524e-05	1.39838e-06
tca-mir-6017-3p	638	16503	1908	3281	3028	1269	2168	2375	2604	1440	6335	5075	4865	2564	94	154	138	65	98	100	123	62	204	161	146	66	2.25798	2.51329	1.85617	2.08963	1.37838	0.799004	2.17296	0.78539	0.000151346	0.000443709	3.64284e-05	3.03668e-05
tca-mir-6018-5p	133	16503	1908	3281	3028	1269	2168	2375	2604	1440	6335	5075	4865	2564	17	29	24	12	30	30	43	21	49	33	31	23	0.562281	0.604516	0.316993	0.652671	3.03906	2.40802	6.24782	2.5905	0.216723	0.0359255	0.0306914	0.61413
tca-mir-7-3p	599	16503	1908	3281	3028	1269	2168	2375	2604	1440	6335	5075	4865	2564	97	166	143	69	113	117	124	70	176	121	132	57	3.65392	5.99981	3.63638	3.55831	4.65609	3.74495	3.33207	2.31623	7.20333e-07	9.71286e-10	7.9639e-06	3.3511e-06
tca-mir-7-5p	410	16503	1908	3281	3028	1269	2168	2375	2604	1440	6335	5075	4865	2564	65	106	102	43	87	87	95	58	121	103	90	35	2.48207	2.92666	3.46893	1.81411	5.79288	4.23837	4.53624	4.05198	3.83909e-05	0.00282457	0.000138244	6.72484e-06
tca-mir-71-3p	281	16503	1908	3281	3028	1269	2168	2375	2604	1440	6335	5075	4865	2564	49	75	72	35	55	53	60	36	88	65	62	28	2.90751	2.67872	3.05579	2.76319	3.0712	1.8247	2.29719	2.11775	0.00336126	0.00115246	0.00130622	0.00181991
tca-mir-71-5p	503	16503	1908	3281	3028	1269	2168	2375	2604	1440	6335	5075	4865	2564	63	108	87	41	90	90	114	55	169	135	127	50	0.652997	0.776589	0.148927	0.509122	3.08062	1.94618	4.80607	1.46165	0.00591364	0.0126905	0.00808898	6.03944e-05
tca-mir-750-3p	251	16503	1908	3281	3028	1269	2168	2375	2604	1440	6335	5075	4865	2564	27	58	44	19	48	50	61	24	84	56	71	24	0.214643	1.05944	0.225761	0.329756	2.57124	2.21163	3.81584	0.564676	0.0267059	0.000748805	0.198658	0.0016143
tca-mir-750-5p	241	16503	1908	3281	3028	1269	2168	2375	2604	1440	6335	5075	4865	2564	34	58	50	25	52	50	60	37	76	52	57	23	1.03686	1.3452	0.834262	1.30144	4.02889	2.58092	4.08274	3.59917	0.00677151	0.000383237	0.0110717	0.00187617
tca-mir-8-3p	1341	16503	1908	3281	3028	1269	2168	2375	2604	1440	6335	5075	4865	2564	269	401	351	191	250	273	307	173	405	279	270	108	15	15	13.3023	15	8.97663	9.69201	12.3737	7.47441	1.80718e-11	0	1.44649e-16	0
tca-mir-8-5p	556	16503	1908	3281	3028	1269	2168	2375	2604	1440	6335	5075	4865	2564	68	120	99	45	112	118	146	75	182	123	135	51	0.551315	0.850417	0.217162	0.491941	5.99331	5.4495	10.3815	4.26637	0.00122615	1.08287e-06	0.0013781	2.2135e-06
tca-mir-87a-3p	546	16503	1908	3281	3028	1269	2168	2375	2604	1440	6335	5075	4865	2564	82	147	132	60	117	115	130	70	173	127	127	56	2.27136	4.68287	3.66089	2.69852	7.7347	5.16979	6.5769	3.37426	0.000236814	2.08305e-05	0.00024382	7.84905e-05
tca-mir-87a-5p	181	16503	1908	3281	3028	1269	2168	2375	2604	1440	6335	5075	4865	2564	25	40	35	19	25	29	37	18	64	53	44	20	0.844385	0.704633	0.490163	1.19265	0.464362	0.642638	1.43196	0.635727	0.109455	0.198315	0.0321516	0.0238253
tca-mir-87b-3p	546	16503	1908	3281	3028	1269	2168	2375	2604	1440	6335	5075	4865	2564	82	147	132	60	117	115	130	70	173	127	127	56	2.27136	4.68287	3.66089	2.69852	7.7347	5.16979	6.5769	3.37426	0.000236814	2.08305e-05	0.00024382	7.84905e-05
tca-mir-87b-5p	218	16503	1908	3281	3028	1269	2168	2375	2604	1440	6335	5075	4865	2564	27	48	41	15	43	45	45	22	67	58	54	21	0.51546	0.725799	0.409705	0.211481	2.65113	2.36072	1.66095	0.704346	0.00474014	0.0469383	0.0317009	0.00317784
tca-mir-927a-3p	411	16503	1908	3281	3028	1269	2168	2375	2604	1440	6335	5075	4865	2564	59	106	97	41	83	78	94	59	127	95	94	41	1.47308	2.88825	2.55251	1.44706	4.70737	2.41128	4.26784	4.29081	0.000356256	0.000134445	0.000620728	0.000261961
tca-mir-927a-5p	946	16503	1908	3281	3028	1269	2168	2375	2604	1440	6335	5075	4865	2564	112	207	178	66	204	202	229	126	301	225	226	87	0.434581	1.27718	0.478089	0.106844	13.2565	9.02865	11.804	6.33405	3.84883e-06	2.6803e-07	1.95558e-05	1.13123e-09
tca-mir-927b-3p	149	16503	1908	3281	3028	1269	2168	2375	2604	1440	6335	5075	4865	2564	20	35	26	14	29	24	35	16	43	38	40	16	0.705595	0.941856	0.250059	0.764838	1.97339	0.633267	2.3035	0.813599	0.00405891	0.0430331	0.137167	0.0271239
tca-mir-927b-5p	946	16503	1908	3281	3028	1269	2168	2375	2604	1440	6335	5075	4865	2564	112	207	178	66	204	202	229	126	301	225	226	87	0.434581	1.27718	0.478089	0.106844	13.2565	9.02865	11.804	6.33405	3.84883e-06	2.6803e-07	1.95558e-05	1.13123e-09
tca-mir-929-3p	335	16503	1908	3281	3028	1269	2168	2375	2604	1440	6335	5075	4865	2564	50	89	75	34	70	69	81	48	90	86	71	34	1.61636	2.96195	1.60479	1.40349	4.60663	3.15652	4.68411	3.63735	2.10784e-06	0.00999729	0.00014962	0.00111761
tca-mir-929-5p	1010	16503	1908	3281	3028	1269	2168	2375	2604	1440	6335	5075	4865	2564	151	260	225	102	179	191	216	119	318	237	233	107	3.49131	5.92035	3.31355	2.75636	5.12418	4.73112	6.31685	3.57726	6.33617e-07	3.09077e-08	6.42384e-07	7.97505e-07
tca-mir-92a-3p	1086	16503	1908	3281	3028	1269	2168	2375	2604	1440	6335	5075	4865	2564	181	269	255	121	214	219	268	148	338	272	223	93	7.06166	4.70951	5.33071	4.96515	9.8889	7.5067	15	7.98424	6.48598e-08	4.59034e-06	1.38694e-12	6.45617e-13
tca-mir-92a-5p	124	16503	1908	3281	3028	1269	2168	2375	2604	1440	6335	5075	4865	2564	15	27	21	9	28	34	37	23	42	26	22	11	0.444211	0.591935	0.217533	0.313616	2.90564	4.33186	4.6209	3.7967	0.082212	0.00425289	0.000823678	0.00928645
tca-mir-92b-3p	1086	16503	1908	3281	3028	1269	2168	2375	2604	1440	6335	5075	4865	2564	181	269	255	121	214	219	268	148	338	272	223	93	7.06166	4.70951	5.33071	4.96515	9.8889	7.5067	15	7.98424	6.48598e-08	4.59034e-06	1.38694e-12	6.45617e-13
tca-mir-92b-5p	175	16503	1908	3281	3028	1269	2168	2375	2604	1440	6335	5075	4865	2564	25	36	27	17	47	47	50	31	48	32	31	11	0.967295	0.436216	0.0881172	0.898757	6.46291	5.31725	5.26777	4.34052	0.000632293	5.36475e-05	0.000102205	6.40093e-05
tca-mir-92c-3p	1086	16503	1908	3281	3028	1269	2168	2375	2604	1440	6335	5075	4865	2564	181	269	255	121	214	219	268	148	338	272	223	93	7.06166	4.70951	5.33071	4.96515	9.8889	7.5067	15	7.98424	6.48598e-08	4.59034e-06	1.38694e-12	6.45617e-13
tca-mir-92c-5p	175	16503	1908	3281	3028	1269	2168	2375	2604	1440	6335	5075	4865	2564	25	36	27	17	47	47	50	31	48	32	31	11	0.967295	0.436216	0.0881172	0.898757	6.46291	5.31725	5.26777	4.34052	0.000632293	5.36475e-05	0.000102205	6.40093e-05
tca-mir-932-3p	221	16503	1908	3281	3028	1269	2168	2375	2604	1440	6335	5075	4865	2564	35	47	45	21	47	40	48	31	73	57	57	24	1.67503	0.569751	0.716885	0.893987	3.57531	1.29904	2.13162	2.51341	0.0251236	0.0271761	0.0591133	0.0127227
tca-mir-932-5p	530	16503	1908	3281	3028	1269	2168	2375	2604	1440	6335	5075	4865	2564	75	136	126	57	98	91	111	62	163	130	112	45	1.56349	3.38608	3.21956	2.39701	3.80829	1.52358	3.25309	2.14393	5.15596e-05	0.000336838	2.80129e-06	3.23728e-07
tca-mir-965-3p	289	16503	1908	3281	3028	1269	2168	2375	2604	1440	6335	5075	4865	2564	42	75	68	33	49	52	64	38	85	73	72	29	1.30544	2.33896	1.98059	2.06413	1.61251	1.44802	2.79824	2.38172	0.000350486	0.0099187	0.021164	0.0017994
tca-mir-965-5p	448	16503	1908	3281	3028	1269	2168	2375	2604	1440	6335	5075	4865	2564	58	102	91	38	97	89	109	65	134	118	110	44	0.802628	1.25718	0.900968	0.638765	6.78598	3.27951	6.13327	4.78628	3.88258e-05	0.00950279	0.00471823	0.000103157
tca-mir-970-3p	353	16503	1908	3281	3028	1269	2168	2375	2604	1440	6335	5075	4865	2564	54	95	82	38	66	66	76	43	116	81	75	31	1.88648	3.30957	2.08875	1.85274	2.95647	2.00862	2.80507	1.99092	0.00747027	0.00026863	0.000114588	4.77058e-05
tca-mir-970-5p	114	16503	1908	3281	3028	1269	2168	2375	2604	1440	6335	5075	4865	2564	15	25	23	9	25	21	24	15	32	31	24	9	0.617297	0.605387	0.584509	0.419846	2.5048	1.04673	1.2924	1.41092	0.00589829	0.117108	0.012093	0.00509532
tca-mir-980-3p	186	16503	1908	3281	3028	1269	2168	2375	2604	1440	6335	5075	4865	2564	24	46	31	14	34	37	46	25	53	39	41	13	0.619606	1.37498	0.163454	0.334439	1.76265	1.82545	3.2739	1.95459	0.00125378	0.000772676	0.0060393	0.000140688
tca-mir-980-5p	127	16503	1908	3281	3028	1269	2168	2375	2604	1440	6335	5075	4865	2564	11	20	17	5	34	34	40	22	39	32	30	11	0.0912181	0.0673862	0.0396557	0.0305387	4.94195	4.09902	5.56089	3.23166	0.0193589	0.046418	0.0388609	0.00717824
tca-mir-981-3p	424	16503	1908	3281	3028	1269	2168	2375	2604	1440	6335	5075	4865	2564	54	99	81	31	112	105	108	74	115	87	104	40	0.703255	1.49022	0.501142	0.243088	13.3959	8.42904	7.15419	8.64431	2.20046e-07	4.7656e-07	0.00545855	5.80403e-05
tca-mir-981-5p	303	16503	1908	3281	3028	1269	2168	2375	2604	1440	6335	5075	4865	2564	29	53	51	15	80	76	81	57	88	75	62	29	0.0745382	0.0776984	0.138461	0.0171595	9.84113	6.60559	6.51887	8.08203	0.000161981	0.00525674	9.37993e-05	0.000660242
tca-mir-989-3p	420	16503	1908	3281	3028	1269	2168	2375	2604	1440	6335	5075	4865	2564	52	88	81	31	94	93	100	65	121	97	101	44	0.573024	0.575841	0.548913	0.260423	7.31873	5.24844	5.25933	5.73714	8.58563e-06	0.000112269	0.00304955	0.000677762
tca-mir-989-5p	246	16503	1908	3281	3028	1269	2168	2375	2604	1440	6335	5075	4865	2564	36	53	42	20	62	64	69	41	69	50	55	22	1.24734	0.642517	0.177789	0.467311	7.04894	6.31897	6.53962	4.73256	0.000171458	6.30475e-05	0.00311509	0.000676495
tca-mir-993-3p	206	16503	1908	3281	3028	1269	2168	2375	2604	1440	6335	5075	4865	2564	26	41	40	18	50	39	49	28	70	54	46	27	0.565104	0.341866	0.512474	0.626741	5.37315	1.55341	3.01693	2.15934	0.0494048	0.0400139	0.00557937	0.0931107
tca-mir-993-5p	275	16503	1908	3281	3028	1269	2168	2375	2604	1440	6335	5075	4865	2564	32	73	63	22	61	60	67	39	87	57	60	24	0.359031	2.56226	1.64714	0.43409	4.95506	3.52035	4.13795	3.0334	0.00491744	4.93826e-05	0.00107262	0.000244054
tca-mir-995-3p	312	16503	1908	3281	3028	1269	2168	2375	2604	1440	6335	5075	4865	2564	58	81	70	34	56	55	58	32	90	80	78	27	4.04835	2.46978	1.5612	1.80849	2.23728	1.34496	1.12233	0.844112	0.000101067	0.0116367	0.0195333	9.00909e-05
tca-mir-995-5p	282	16503	1908	3281	3028	1269	2168	2375	2604	1440	6335	5075	4865	2564	35	68	56	21	54	49	58	33	104	71	69	31	0.54117	1.48196	0.642131	0.297343	2.80357	1.17759	1.90082	1.47455	0.169358	0.00980902	0.0152793	0.00763686
tca-mir-998-3p	312	16503	1908	3281	3028	1269	2168	2375	2604	1440	6335	5075	4865	2564	58	81	70	34	56	55	58	32	90	80	78	27	4.04835	2.46978	1.5612	1.80849	2.23728	1.34496	1.12233	0.844112	0.000101067	0.0116367	0.0195333	9.00909e-05
tca-mir-998-5p	677	16503	1908	3281	3028	1269	2168	2375	2604	1440	6335	5075	4865	2564	98	194	164	67	135	138	163	96	228	144	144	62	2.10576	8.06801	4.41008	1.86239	6.78847	5.23926	8.40611	6.19324	0.00234658	4.88384e-09	2.30709e-07	1.93092e-07
tca-mir-9a-3p	783	16503	1908	3281	3028	1269	2168	2375	2604	1440	6335	5075	4865	2564	159	232	195	104	151	155	178	102	225	175	177	71	12.7788	11.0429	5.94038	7.9733	6.55268	5.0395	7.15433	4.84777	1.86719e-09	2.21026e-08	2.5483e-06	1.49432e-08
tca-mir-9a-5p	652	16503	1908	3281	3028	1269	2168	2375	2604	1440	6335	5075	4865	2564	127	183	152	91	150	162	178	112	179	129	135	53	9.11389	6.94873	3.31623	8.11382	12.1586	12.6788	14.1693	12.1696	6.08614e-10	3.62803e-11	6.33931e-08	2.92601e-09
tca-mir-9b-3p	783	16503	1908	3281	3028	1269	2168	2375	2604	1440	6335	5075	4865	2564	159	232	195	104	151	155	178	102	225	175	177	71	12.7788	11.0429	5.94038	7.9733	6.55268	5.0395	7.15433	4.84777	1.86719e-09	2.21026e-08	2.5483e-06	1.49432e-08
tca-mir-9b-5p	1024	16503	1908	3281	3028	1269	2168	2375	2604	1440	6335	5075	4865	2564	168	284	239	120	213	217	253	147	305	209	215	85	6.14776	9.80652	4.84318	6.00792	12.16	9.34917	14.0913	9.49519	7.76849e-10	4.96629e-15	6.53883e-11	4.11237e-13
tca-mir-9c-3p	127	16503	1908	3281	3028	1269	2168	2375	2604	1440	6335	5075	4865	2564	16	27	24	11	31	37	40	21	30	20	20	7	0.526753	0.519991	0.416797	0.567516	3.76175	5.29201	5.56089	2.85307	0.000123694	3.33481e-05	0.000105385	0.000183928
tca-mir-9c-5p	652	16503	1908	3281	3028	1269	2168	2375	2604	1440	6335	5075	4865	2564	127	183	152	91	150	162	178	112	179	129	135	53	9.11389	6.94873	3.31623	8.11382	12.1586	12.6788	14.1693	12.1696	6.08614e-10	3.62803e-11	6.33931e-08	2.92601e-09
tca-mir-9d-3p	783	16503	1908	3281	3028	1269	2168	2375	2604	1440	6335	5075	4865	2564	159	232	195	104	151	155	178	102	225	175	177	71	12.7788	11.0429	5.94038	7.9733	6.55268	5.0395	7.15433	4.84777	1.86719e-09	2.21026e-08	2.5483e-06	1.49432e-08
tca-mir-9d-5p	652	16503	1908	3281	3028	1269	2168	2375	2604	1440	6335	5075	4865	2564	127	183	152	91	150	162	178	112	179	129	135	53	9.11389	6.94873	3.31623	8.11382	12.1586	12.6788	14.1693	12.1696	6.08614e-10	3.62803e-11	6.33931e-08	2.92601e-09
tca-mir-9e-3p	783	16503	1908	3281	3028	1269	2168	2375	2604	1440	6335	5075	4865	2564	159	232	195	104	151	155	178	102	225	175	177	71	12.7788	11.0429	5.94038	7.9733	6.55268	5.0395	7.15433	4.84777	1.86719e-09	2.21026e-08	2.5483e-06	1.49432e-08
tca-mir-9e-5p	652	16503	1908	3281	3028	1269	2168	2375	2604	1440	6335	5075	4865	2564	127	183	152	91	150	162	178	112	179	129	135	53	9.11389	6.94873	3.31623	8.11382	12.1586	12.6788	14.1693	12.1696	6.08614e-10	3.62803e-11	6.33931e-08	2.92601e-09
tca-mir-iab-4-3p	140	16503	1908	3281	3028	1269	2168	2375	2604	1440	6335	5075	4865	2564	21	35	33	15	31	27	39	20	41	31	28	13	1.07962	1.26167	1.32885	1.14538	2.96534	1.37589	4.06313	2.0037	0.00662938	0.00649618	0.00311953	0.00943016
tca-mir-iab-4-5p	307	16503	1908	3281	3028	1269	2168	2375	2604	1440	6335	5075	4865	2564	56	77	69	34	78	73	89	50	90	63	55	19	3.71375	1.99238	1.56402	1.90779	8.77327	5.44868	8.92175	5.25764	0.000215815	1.41669e-05	8.21009e-07	1.50697e-07
tca-mir-iab-8-3p	192	16503	1908	3281	3028	1269	2168	2375	2604	1440	6335	5075	4865	2564	27	43	46	18	42	36	45	25	55	51	38	13	0.934229	0.780214	1.70185	0.812074	3.56713	1.43103	2.70266	1.78814	0.00124537	0.0539312	0.000630213	7.61958e-05
tca-mir-iab-8-5p	660	16503	1908	3281	3028	1269	2168	2375	2604	1440	6335	5075	4865	2564	102	172	160	67	145	149	164	96	203	140	136	61	3.06244	4.4678	4.33889	2.09774	10.2018	8.49049	9.53147	6.71043	7.96442e-06	6.11702e-09	3.81806e-08	3.83739e-07

## Sheet: Cuffdiff-miRanda
Supplementary Table 3d. MicroRNA target enrichment in down-, up- and not- regulated protein-coding genes between oocytes and 8-16 h, 16-24 h and 24-48h intervals. Data is obained using the miRanda prediction method, and differential expression is estimated by the cuffdiff algorithm. Shading of columns showing targets enrichment p-values reflects increasingly significant estimates.
	number of targets in all genes	number of all genes	numbers of down-regulated genes (fold difference >2; p<0.05) between oocytes and				numbers of up-regulated genes (fold difference >2; p<0.05) between oocytes and				numbers of notregulated genes (fold difference <2; p>0.05) between oocytes and				numbers of microRNA targets within down-regulated genes (fold difference >2; p<0.05) between oocytes and				numbers of microRNA targets within up-regulated genes (fold difference >2; p<0.05) between oocytes and				numbers of microRNA targets within notregulated genes (fold difference <2; p>0.05) between oocytes and				-LOG10 p-value of microRNA target enrichment within down-regulated genes (fold difference >2; p<0.05) between oocytes and				-LOG10 p-value of microRNA target enrichment within up-regulated genes (fold difference >2; p<0.05) between oocytes and				-LOG10 p-value of microRNA target enrichment within notregulated genes (fold difference <2; p>0.05) between oocytes and
			8-16 h	16-24 h	24-48 h	all	8-16 h	16-24 h	24-48 h	all	8-16 h	16-24 h	24-48 h	all	8-16 h	16-24 h	24-48 h	all	8-16 h	16-24 h	24-48 h	all	8-16 h	16-24 h	24-48 h	all	8-16 h	16-24 h	24-48 h	all	8-16 h	16-24 h	24-48 h	all	8-16 h	16-24 h	24-48 h	all
tca-mir-3851m-1-3p	256	16503	1908	3281	3028	1269	2168	2375	2604	1440	6335	5075	4865	2564	61	84	75	42	42	50	59	28	69	50	52	18	8.04964	6.51322	5.21904	6.04142	1.27921	2.04311	3.08248	1.05562	3.02013e-05	1.35528e-05	0.000229781	1.18673e-05
tca-mir-3851m-1-5p	557	16503	1908	3281	3028	1269	2168	2375	2604	1440	6335	5075	4865	2564	89	139	130	62	115	108	132	68	176	136	129	55	3.22429	2.91109	2.96384	2.89917	6.70516	3.39405	6.54309	2.7328	0.000178617	0.000202046	0.000176737	2.18766e-05
tca-mir-11617c-3p	597	16503	1908	3281	3028	1269	2168	2375	2604	1440	6335	5075	4865	2564	98	162	135	57	110	101	120	67	202	147	132	54	3.90513	5.28951	2.50177	1.41862	4.11168	1.46558	2.75911	1.86459	0.00467272	0.000195963	9.88535e-06	6.09068e-07
tca-mir-11617c-5p	553	16503	1908	3281	3028	1269	2168	2375	2604	1440	6335	5075	4865	2564	86	141	127	60	117	115	139	76	167	134	124	49	2.77989	3.35448	2.64196	2.57036	7.41068	4.90327	8.54583	4.5909	1.1532e-05	0.000147235	3.96949e-05	7.64803e-07
tca-mir-11617e-5p	429	16503	1908	3281	3028	1269	2168	2375	2604	1440	6335	5075	4865	2564	65	101	93	45	114	98	114	71	118	96	89	35	2.03139	1.59774	1.48327	1.86612	13.8147	6.12132	8.61987	7.34754	4.52342e-07	2.49297e-05	9.3466e-06	1.30423e-06
tca-mir-11617f-1-5p	364	16503	1908	3281	3028	1269	2168	2375	2604	1440	6335	5075	4865	2564	51	81	72	32	80	74	93	52	95	85	78	31	1.2049	0.944483	0.666649	0.736998	6.03027	3.15339	6.35326	3.83289	1.67637e-07	0.000414133	0.000125841	1.9109e-05
tca-mir-3836i-1-3p	242	16503	1908	3281	3028	1269	2168	2375	2604	1440	6335	5075	4865	2564	47	64	46	23	55	53	59	32	55	55	54	16	3.91609	2.30267	0.447026	0.92327	4.88392	3.25271	3.76032	2.16883	5.46778e-08	0.00142824	0.00316605	7.564e-06
tca-mir-3836i-1-5p	285	16503	1908	3281	3028	1269	2168	2375	2604	1440	6335	5075	4865	2564	33	61	56	20	69	67	73	45	82	62	62	19	0.346758	0.633942	0.593326	0.21193	6.98097	4.90338	5.23242	4.48068	0.000167191	0.000175881	0.000834604	1.5692e-06
tca-mir-11617f-2-5p	364	16503	1908	3281	3028	1269	2168	2375	2604	1440	6335	5075	4865	2564	51	81	72	32	80	74	93	52	95	85	78	31	1.2049	0.944483	0.666649	0.736998	6.03027	3.15339	6.35326	3.83289	1.67637e-07	0.000414133	0.000125841	1.9109e-05
tca-mir-3836i-2-3p	242	16503	1908	3281	3028	1269	2168	2375	2604	1440	6335	5075	4865	2564	47	64	46	23	55	53	59	32	55	55	54	16	3.91609	2.30267	0.447026	0.92327	4.88392	3.25271	3.76032	2.16883	5.46778e-08	0.00142824	0.00316605	7.564e-06
tca-mir-3836i-2-5p	285	16503	1908	3281	3028	1269	2168	2375	2604	1440	6335	5075	4865	2564	33	61	56	20	69	67	73	45	82	62	62	19	0.346758	0.633942	0.593326	0.21193	6.98097	4.90338	5.23242	4.48068	0.000167191	0.000175881	0.000834604	1.5692e-06
tca-mir-11641-5p	1230	16503	1908	3281	3028	1269	2168	2375	2604	1440	6335	5075	4865	2564	218	321	282	146	215	225	263	135	369	297	281	104	10.8916	7.82333	4.95333	7.53816	5.59206	4.45339	7.56193	2.693	4.63447e-11	2.63833e-08	1.53912e-08	6.84673e-15
tca-mir-276b-3p	271	16503	1908	3281	3028	1269	2168	2375	2604	1440	6335	5075	4865	2564	47	65	62	29	57	67	68	39	77	60	65	26	2.77265	1.40165	1.62036	1.55602	4.0017	5.70143	4.62207	3.15923	0.000144925	0.000402755	0.0109815	0.00119634
tca-mir-276b-5p	134	16503	1908	3281	3028	1269	2168	2375	2604	1440	6335	5075	4865	2564	25	38	31	15	26	22	32	17	43	39	30	18	2.264	2.18079	1.19342	1.28425	1.8338	0.677291	2.29119	1.36307	0.0349095	0.206386	0.0180826	0.152413
tca-mir-3851g-3-3p	301	16503	1908	3281	3028	1269	2168	2375	2604	1440	6335	5075	4865	2564	69	97	86	46	49	58	65	34	86	60	63	26	8.20803	6.93839	5.35706	5.6165	1.33279	2.12162	2.54612	1.30906	8.77744e-05	5.95682e-06	0.000199491	0.000112359
tca-mir-11642-3p	574	16503	1908	3281	3028	1269	2168	2375	2604	1440	6335	5075	4865	2564	92	143	121	57	137	127	155	95	178	121	110	39	3.35225	2.94185	1.40173	1.71207	12.4248	6.83006	12.0111	9.52769	4.64517e-05	3.62728e-08	2.81316e-09	3.42086e-11
tca-mir-11642-5p	902	16503	1908	3281	3028	1269	2168	2375	2604	1440	6335	5075	4865	2564	152	258	226	103	151	152	181	97	282	195	181	73	6.32476	10.4178	6.99614	4.76902	3.23199	1.83124	3.75487	1.88423	1.19429e-06	8.21149e-11	1.16465e-11	2.46651e-12
tca-mir-3836c-1-3p	157	16503	1908	3281	3028	1269	2168	2375	2604	1440	6335	5075	4865	2564	27	39	32	18	29	33	43	21	48	42	37	19	1.89081	1.29193	0.658717	1.48748	1.66969	2.06136	4.18585	1.74634	0.0109578	0.0744296	0.0263978	0.0645567
tca-mir-3836c-1-5p	278	16503	1908	3281	3028	1269	2168	2375	2604	1440	6335	5075	4865	2564	41	68	53	25	54	58	60	36	87	68	74	38	1.37605	1.60801	0.464033	0.761054	2.95075	2.92321	2.40501	2.19164	0.00341915	0.00514963	0.0764566	0.107241
tca-mir-11624b-2-3p	257	16503	1908	3281	3028	1269	2168	2375	2604	1440	6335	5075	4865	2564	32	56	51	22	58	57	70	39	71	63	60	27	0.543526	0.707618	0.624178	0.5968	4.99803	3.58169	6.09207	3.63482	7.39784e-05	0.0069082	0.00707703	0.00546573
tca-mir-11643-3p	206	16503	1908	3281	3028	1269	2168	2375	2604	1440	6335	5075	4865	2564	27	45	41	20	55	54	51	36	55	45	49	16	0.684389	0.676739	0.605609	0.948	7.28062	5.59934	3.54388	4.73858	0.000110557	0.00116287	0.0177705	0.000268219
tca-mir-11643-5p	142	16503	1908	3281	3028	1269	2168	2375	2604	1440	6335	5075	4865	2564	20	28	23	12	26	26	33	19	43	42	37	20	0.848858	0.32874	0.151524	0.527134	1.52926	1.11706	2.14376	1.65574	0.0118194	0.23651	0.103137	0.198533
tca-mir-6016b-3p	195	16503	1908	3281	3028	1269	2168	2375	2604	1440	6335	5075	4865	2564	35	45	42	20	30	39	42	20	64	41	41	15	2.526	0.944774	0.969833	1.13516	0.826521	1.92148	1.89834	0.73362	0.0275529	0.000644462	0.00206521	0.000331964
tca-mir-6016b-5p	120	16503	1908	3281	3028	1269	2168	2375	2604	1440	6335	5075	4865	2564	10	20	16	4	29	27	25	16	44	40	42	20	0.0793886	0.109701	0.0420283	0.0183158	3.50198	2.2362	1.26963	1.50322	0.212329	0.627675	1.10849	0.506508
tca-mir-11644-3p	111	16503	1908	3281	3028	1269	2168	2375	2604	1440	6335	5075	4865	2564	13	19	17	6	33	25	28	20	32	31	24	15	0.390167	0.139699	0.121735	0.119671	5.93794	2.13845	2.46711	3.25943	0.00981824	0.152808	0.0177462	0.175166
tca-mir-11644-5p	381	16503	1908	3281	3028	1269	2168	2375	2604	1440	6335	5075	4865	2564	48	81	67	26	82	90	104	60	117	84	90	34	0.633772	0.64618	0.206389	0.154683	5.7686	6.36184	8.62862	5.61742	0.000413759	3.5076e-05	0.00252976	3.6861e-05
tca-mir-307b-3p	154	16503	1908	3281	3028	1269	2168	2375	2604	1440	6335	5075	4865	2564	21	22	26	12	37	35	45	27	53	40	36	18	0.760854	0.0203616	0.196438	0.392521	4.13703	2.72622	5.1247	3.83256	0.083616	0.0522539	0.0244463	0.05055
tca-mir-307b-5p	406	16503	1908	3281	3028	1269	2168	2375	2604	1440	6335	5075	4865	2564	52	91	76	31	82	82	90	52	116	99	96	35	0.721673	1.05171	0.406055	0.32898	4.66322	3.31284	3.61704	2.70406	7.48782e-06	0.00107275	0.00202633	9.4043e-06
tca-mir-927c-3p	614	16503	1908	3281	3028	1269	2168	2375	2604	1440	6335	5075	4865	2564	98	164	141	62	113	109	131	76	199	146	132	52	3.45468	4.92077	2.85168	1.94666	4.18025	2.10719	4.07046	3.13612	0.000433938	2.53371e-05	1.48464e-06	3.84337e-08
tca-mir-927c-5p	398	16503	1908	3281	3028	1269	2168	2375	2604	1440	6335	5075	4865	2564	53	79	72	33	72	71	91	47	135	98	96	40	0.925161	0.322144	0.282132	0.545752	2.74817	1.65254	4.15397	1.8687	0.0154478	0.00163829	0.00405699	0.0003733
tca-mir-11645-5p	128	16503	1908	3281	3028	1269	2168	2375	2604	1440	6335	5075	4865	2564	17	28	25	9	18	21	23	14	41	29	31	14	0.653539	0.610841	0.500986	0.278259	0.494916	0.668228	0.682262	0.83066	0.0365125	0.0116853	0.0511831	0.0406618
tca-mir-11646-3p	424	16503	1908	3281	3028	1269	2168	2375	2604	1440	6335	5075	4865	2564	61	79	69	35	113	116	132	81	133	95	88	35	1.51785	0.142525	0.068243	0.537115	13.7962	12.2069	15	11.421	0.000597052	2.90223e-05	1.06142e-05	2.02307e-06
tca-mir-11646-5p	740	16503	1908	3281	3028	1269	2168	2375	2604	1440	6335	5075	4865	2564	103	158	131	63	138	147	187	93	234	167	167	69	1.71388	0.84764	0.181585	0.75671	5.23857	4.90031	11.4548	3.9025	2.29034e-05	1.08447e-07	4.12317e-06	1.19563e-07
tca-mir-11647-3p	868	16503	1908	3281	3028	1269	2168	2375	2604	1440	6335	5075	4865	2564	120	195	192	83	185	176	194	116	270	226	202	98	1.80572	1.62402	2.77514	1.78774	11.5862	6.31883	7.15133	5.9599	1.14768e-06	0.000427614	6.71316e-06	6.20143e-05
tca-mir-11648-3p	176	16503	1908	3281	3028	1269	2168	2375	2604	1440	6335	5075	4865	2564	29	38	29	18	43	41	48	31	56	39	45	20	1.72524	0.60322	0.153207	1.07805	4.83977	3.2744	4.50557	4.29055	0.0182552	0.00302029	0.0674993	0.0324505
tca-mir-11648-5p	1027	16503	1908	3281	3028	1269	2168	2375	2604	1440	6335	5075	4865	2564	193	302	254	130	190	190	226	128	322	241	240	108	12.0075	13.7643	7.25376	8.44719	6.69379	4.13891	7.62759	4.91949	3.26252e-07	2.39389e-08	1.5586e-06	4.42047e-07
tca-mir-3851n-1-3p	236	16503	1908	3281	3028	1269	2168	2375	2604	1440	6335	5075	4865	2564	61	77	69	41	36	44	51	25	66	51	52	21	9.54862	5.94467	4.84534	6.61064	0.843147	1.55661	2.17174	0.890884	0.00020192	0.000449024	0.00261896	0.000781161
tca-mir-3851n-1-5p	534	16503	1908	3281	3028	1269	2168	2375	2604	1440	6335	5075	4865	2564	85	137	123	60	118	109	130	71	166	124	123	48	3.06262	3.40152	2.62886	2.92948	8.60866	4.33254	7.16263	3.88655	9.19166e-05	2.30653e-05	0.000180841	1.81237e-06
tca-mir-3851p-3p	386	16503	1908	3281	3028	1269	2168	2375	2604	1440	6335	5075	4865	2564	81	114	97	51	72	83	87	52	108	76	85	32	7.56905	5.7705	3.50126	4.28854	3.12135	4.29405	3.78045	3.20275	3.94751e-06	2.13232e-07	0.00022901	5.98443e-06
tca-mir-3851p-5p	286	16503	1908	3281	3028	1269	2168	2375	2604	1440	6335	5075	4865	2564	45	69	57	26	61	60	68	43	84	73	68	32	1.89459	1.49857	0.662507	0.806288	4.40616	3.05787	3.84136	3.81901	0.000353402	0.012941	0.00781562	0.00938415
tca-mir-11617d-2-5p	364	16503	1908	3281	3028	1269	2168	2375	2604	1440	6335	5075	4865	2564	51	81	72	32	80	74	93	52	95	85	78	31	1.2049	0.944483	0.666649	0.736998	6.03027	3.15339	6.35326	3.83289	1.67637e-07	0.000414133	0.000125841	1.9109e-05
tca-mir-3836j-3p	222	16503	1908	3281	3028	1269	2168	2375	2604	1440	6335	5075	4865	2564	54	69	48	30	47	49	56	32	50	46	47	15	7.57737	4.62563	1.04732	3.05707	3.5275	3.15279	4.03729	2.76167	1.25931e-07	0.000215979	0.00137214	2.3067e-05
tca-mir-11617d-3-5p	364	16503	1908	3281	3028	1269	2168	2375	2604	1440	6335	5075	4865	2564	51	81	72	32	80	74	93	52	95	85	78	31	1.2049	0.944483	0.666649	0.736998	6.03027	3.15339	6.35326	3.83289	1.67637e-07	0.000414133	0.000125841	1.9109e-05
tca-mir-3851l-4-3p	298	16503	1908	3281	3028	1269	2168	2375	2604	1440	6335	5075	4865	2564	67	95	85	44	48	59	63	35	85	65	65	24	7.6421	6.56945	5.27416	5.01735	1.25176	2.40771	2.27151	1.54261	8.80199e-05	0.000142918	0.000719065	3.36012e-05
tca-mir-3851l-4-5p	469	16503	1908	3281	3028	1269	2168	2375	2604	1440	6335	5075	4865	2564	77	123	108	52	110	89	108	66	133	104	111	41	3.2419	3.53656	2.39362	2.52183	9.65709	2.64393	4.91331	4.41783	1.06446e-06	7.34746e-06	0.00111584	3.22368e-06
tca-mir-11649-3p	222	16503	1908	3281	3028	1269	2168	2375	2604	1440	6335	5075	4865	2564	30	61	52	24	33	35	44	21	77	61	46	27	0.813782	2.63869	1.6473	1.45572	0.718606	0.613727	1.36778	0.527389	0.0662825	0.0761348	0.000837595	0.0425057
tca-mir-11650-3p	112	16503	1908	3281	3028	1269	2168	2375	2604	1440	6335	5075	4865	2564	9	21	22	5	21	28	34	15	37	28	22	7	0.0717509	0.249341	0.509259	0.0606169	1.47597	3.0214	4.50461	1.47258	0.0664091	0.0504452	0.00529909	0.001006
tca-mir-11617a-1-3p	506	16503	1908	3281	3028	1269	2168	2375	2604	1440	6335	5075	4865	2564	83	132	113	53	109	109	110	71	148	106	115	35	3.41922	3.63034	2.03915	2.05682	7.39125	5.40641	3.87577	4.64414	3.4057e-06	1.48187e-07	0.000141885	8.4152e-10
tca-mir-11617a-1-5p	364	16503	1908	3281	3028	1269	2168	2375	2604	1440	6335	5075	4865	2564	52	91	83	38	74	67	83	49	121	85	74	33	1.34285	2.18193	1.89775	1.65794	4.39289	1.87835	3.82202	3.05938	0.0099903	0.000414133	1.77375e-05	7.41003e-05
tca-mir-3836d-3p	205	16503	1908	3281	3028	1269	2168	2375	2604	1440	6335	5075	4865	2564	46	61	43	23	43	41	53	26	51	45	48	14	5.54723	3.60453	0.844619	1.59026	3.21454	1.98097	4.17414	1.69206	1.15922e-05	0.00132613	0.0136407	5.14648e-05
tca-mir-3836d-5p	362	16503	1908	3281	3028	1269	2168	2375	2604	1440	6335	5075	4865	2564	59	88	74	42	74	73	80	51	106	66	76	25	2.59665	1.80989	0.872175	2.53924	4.47665	3.01907	3.26409	3.62482	6.74936e-05	1.42952e-08	6.23556e-05	1.70744e-07
tca-mir-3836c-2-3p	205	16503	1908	3281	3028	1269	2168	2375	2604	1440	6335	5075	4865	2564	38	53	43	22	31	31	32	20	68	60	52	27	2.93614	1.8395	0.844619	1.36323	0.769278	0.471736	0.319071	0.599534	0.031231	0.188707	0.0504285	0.0974896
tca-mir-3836c-2-5p	278	16503	1908	3281	3028	1269	2168	2375	2604	1440	6335	5075	4865	2564	41	68	53	25	54	58	60	36	87	68	74	38	1.37605	1.60801	0.464033	0.761054	2.95075	2.92321	2.40501	2.19164	0.00341915	0.00514963	0.0764566	0.107241
tca-mir-11618a-1-3p	190	16503	1908	3281	3028	1269	2168	2375	2604	1440	6335	5075	4865	2564	24	42	40	15	43	41	53	29	63	49	40	19	0.560246	0.715569	0.840744	0.408857	3.98434	2.5843	5.18219	2.97896	0.0350264	0.0349759	0.00235347	0.00777337
tca-mir-11618a-1-5p	456	16503	1908	3281	3028	1269	2168	2375	2604	1440	6335	5075	4865	2564	67	100	93	44	95	103	109	65	123	105	96	42	1.78525	0.915259	0.940028	1.30039	5.86904	6.14134	5.73945	4.53939	5.68253e-08	5.45863e-05	1.02734e-05	1.74697e-05
tca-mir-3851o-2-3p	254	16503	1908	3281	3028	1269	2168	2375	2604	1440	6335	5075	4865	2564	60	79	72	41	42	51	56	29	73	55	56	23	7.78444	5.17084	4.51142	5.73319	1.32571	2.31122	2.5049	1.26221	0.00032524	0.000311567	0.00198073	0.000687286
tca-mir-3851o-2-5p	276	16503	1908	3281	3028	1269	2168	2375	2604	1440	6335	5075	4865	2564	33	63	60	24	66	62	70	41	88	66	62	25	0.427938	1.01624	1.19748	0.65086	6.50853	3.98466	4.89875	3.56967	0.00610513	0.00300205	0.00224082	0.000438987
tca-mir-3851k-1-3p	239	16503	1908	3281	3028	1269	2168	2375	2604	1440	6335	5075	4865	2564	59	76	67	40	37	46	53	27	67	53	53	21	8.43844	5.40457	4.09975	6.03414	0.917083	1.82733	2.46907	1.17468	0.000202173	0.000817415	0.00288336	0.000610969
tca-mir-3851k-1-5p	492	16503	1908	3281	3028	1269	2168	2375	2604	1440	6335	5075	4865	2564	76	126	116	52	105	95	113	65	151	108	107	43	2.46723	3.15804	2.88796	2.10579	6.9367	3.01827	5.04631	3.54965	7.93851e-05	2.71528e-06	2.37015e-05	1.91188e-06
tca-mir-11618b-1-3p	446	16503	1908	3281	3028	1269	2168	2375	2604	1440	6335	5075	4865	2564	79	129	119	56	82	83	98	52	139	106	98	44	4.40687	5.87465	5.38654	3.997	3.23961	2.28276	3.71705	1.88819	0.000333712	0.000245312	8.02807e-05	0.000118741
tca-mir-11618b-1-5p	458	16503	1908	3281	3028	1269	2168	2375	2604	1440	6335	5075	4865	2564	65	100	95	44	96	106	116	68	132	96	93	39	1.46412	0.880707	1.08712	1.27481	6.0454	6.84742	7.47007	5.3113	3.76528e-06	5.48072e-07	1.78126e-06	2.00004e-06
tca-mir-11614-3p	132	16503	1908	3281	3028	1269	2168	2375	2604	1440	6335	5075	4865	2564	19	28	28	14	34	27	29	19	40	39	33	16	0.902715	0.515803	0.77895	1.08515	4.54976	1.67869	1.64828	1.97986	0.0142856	0.238518	0.0703037	0.079365
tca-mir-11614-5p	541	16503	1908	3281	3028	1269	2168	2375	2604	1440	6335	5075	4865	2564	63	112	102	38	120	111	125	78	178	128	135	56	0.354707	0.535142	0.451254	0.16191	8.84481	4.49656	5.6322	5.46193	0.00178092	5.3512e-05	0.00433901	0.000108784
tca-mir-3836e-3p	230	16503	1908	3281	3028	1269	2168	2375	2604	1440	6335	5075	4865	2564	54	69	49	30	48	51	59	34	54	48	48	16	7.01799	4.08007	0.971273	2.80423	3.43044	3.2953	4.43117	3.07621	4.09564e-07	0.000208737	0.000832114	2.59992e-05
tca-mir-3836e-5p	339	16503	1908	3281	3028	1269	2168	2375	2604	1440	6335	5075	4865	2564	43	78	75	25	81	84	85	54	102	67	59	25	0.643958	1.18421	1.4955	0.271227	7.74335	6.94594	5.53048	5.30168	0.000339119	1.22518e-06	7.28336e-08	1.66758e-06
tca-mir-11619e-3p	211	16503	1908	3281	3028	1269	2168	2375	2604	1440	6335	5075	4865	2564	28	53	45	20	43	49	54	28	63	45	41	15	0.732391	1.6027	0.944279	0.871867	2.94348	3.69971	4.10617	2.01799	0.00250238	0.000592259	0.000243261	7.04287e-05
tca-mir-11619e-5p	1633	16503	1908	3281	3028	1269	2168	2375	2604	1440	6335	5075	4865	2564	272	432	385	189	293	306	355	198	498	392	387	163	10.4091	11.3543	8.0233	8.76433	8.63226	6.86428	11.0687	6.43003	6.63843e-13	5.60155e-11	9.89028e-09	1.94326e-12
tca-mir-3836c-3-3p	209	16503	1908	3281	3028	1269	2168	2375	2604	1440	6335	5075	4865	2564	46	57	39	21	44	45	55	28	50	53	53	17	5.30389	2.44092	0.386115	1.08401	3.30454	2.73386	4.52933	2.07356	2.4814e-06	0.022391	0.0489705	0.000448014
tca-mir-3836c-3-5p	270	16503	1908	3281	3028	1269	2168	2375	2604	1440	6335	5075	4865	2564	36	61	49	21	56	57	60	37	83	70	71	37	0.80898	0.936538	0.304465	0.376201	3.77718	3.01539	2.7114	2.65078	0.00219475	0.0205575	0.0642795	0.112394
tca-mir-11618a-4-3p	190	16503	1908	3281	3028	1269	2168	2375	2604	1440	6335	5075	4865	2564	24	42	40	15	43	41	53	29	63	49	40	19	0.560246	0.715569	0.840744	0.408857	3.98434	2.5843	5.18219	2.97896	0.0350264	0.0349759	0.00235347	0.00777337
tca-mir-11618a-4-5p	351	16503	1908	3281	3028	1269	2168	2375	2604	1440	6335	5075	4865	2564	51	80	72	33	77	82	89	53	95	81	70	30	1.44352	1.12188	0.885398	1.01514	5.80663	5.67477	5.96814	4.54478	1.85489e-06	0.000338271	1.17146e-05	2.81657e-05
tca-mir-3851o-1-3p	254	16503	1908	3281	3028	1269	2168	2375	2604	1440	6335	5075	4865	2564	60	79	72	41	42	51	56	29	73	55	56	23	7.78444	5.17084	4.51142	5.73319	1.32571	2.31122	2.5049	1.26221	0.00032524	0.000311567	0.00198073	0.000687286
tca-mir-3851o-1-5p	301	16503	1908	3281	3028	1269	2168	2375	2604	1440	6335	5075	4865	2564	38	67	64	26	69	73	78	47	91	64	68	23	0.608082	0.876755	1.07728	0.642627	6.02382	5.78617	5.73507	4.50962	0.000770781	5.73551e-05	0.00182113	1.14943e-05
tca-mir-3851l-2-3p	298	16503	1908	3281	3028	1269	2168	2375	2604	1440	6335	5075	4865	2564	67	95	85	44	48	59	63	35	85	65	65	24	7.6421	6.56945	5.27416	5.01735	1.25176	2.40771	2.27151	1.54261	8.80199e-05	0.000142918	0.000719065	3.36012e-05
tca-mir-3851l-2-5p	469	16503	1908	3281	3028	1269	2168	2375	2604	1440	6335	5075	4865	2564	77	123	108	52	110	89	108	66	133	104	111	41	3.2419	3.53656	2.39362	2.52183	9.65709	2.64393	4.91331	4.41783	1.06446e-06	7.34746e-06	0.00111584	3.22368e-06
tca-mir-11618b-2-3p	446	16503	1908	3281	3028	1269	2168	2375	2604	1440	6335	5075	4865	2564	79	129	119	56	82	83	98	52	139	106	98	44	4.40687	5.87465	5.38654	3.997	3.23961	2.28276	3.71705	1.88819	0.000333712	0.000245312	8.02807e-05	0.000118741
tca-mir-11618b-2-5p	458	16503	1908	3281	3028	1269	2168	2375	2604	1440	6335	5075	4865	2564	65	100	95	44	96	106	116	68	132	96	93	39	1.46412	0.880707	1.08712	1.27481	6.0454	6.84742	7.47007	5.3113	3.76528e-06	5.48072e-07	1.78126e-06	2.00004e-06
tca-mir-3836f-3p	234	16503	1908	3281	3028	1269	2168	2375	2604	1440	6335	5075	4865	2564	54	65	48	30	55	56	60	39	55	47	47	18	6.75262	2.88814	0.766099	2.68479	5.34709	4.4857	4.48418	4.55018	3.45301e-07	6.50442e-05	0.000294488	0.000100287
tca-mir-3836f-5p	232	16503	1908	3281	3028	1269	2168	2375	2604	1440	6335	5075	4865	2564	32	52	55	24	52	53	51	34	60	45	45	17	0.914406	0.836427	1.80236	1.265	4.49455	3.73156	2.32538	3.008	1.48939e-05	2.5726e-05	0.000126056	5.21963e-05
tca-mir-11619f-3p	312	16503	1908	3281	3028	1269	2168	2375	2604	1440	6335	5075	4865	2564	43	73	65	28	63	68	77	35	103	76	65	30	1.0243	1.28026	0.948145	0.779973	3.7843	3.85792	4.8313	1.29192	0.0119333	0.00310648	0.000136556	0.0006127
tca-mir-11619f-5p	786	16503	1908	3281	3028	1269	2168	2375	2604	1440	6335	5075	4865	2564	100	191	179	69	177	175	202	118	247	176	156	66	0.86609	3.09745	3.23939	0.964573	13.3252	9.34402	13.0889	8.89659	8.0858e-06	2.42492e-08	9.139e-11	3.71263e-10
tca-mir-11620-3p	55	16503	1908	3281	3028	1269	2168	2375	2604	1440	6335	5075	4865	2564	8	12	8	4	13	15	18	12	19	16	15	9	0.745676	0.537729	0.153988	0.379218	1.99802	2.43512	3.31209	3.1423	0.17421	0.267023	0.2396	0.459412
tca-mir-11620-5p	288	16503	1908	3281	3028	1269	2168	2375	2604	1440	6335	5075	4865	2564	43	70	52	26	62	68	72	44	80	63	64	23	1.48811	1.57718	0.288405	0.782729	4.59242	5.02997	4.78033	4.05195	3.86832e-05	0.000195307	0.00141498	3.80473e-05
tca-mir-11615-3p	164	16503	1908	3281	3028	1269	2168	2375	2604	1440	6335	5075	4865	2564	21	38	32	11	34	40	40	24	52	36	34	17	0.58428	0.905432	0.512781	0.21182	2.63642	3.6595	2.83826	2.37334	0.019781	0.00329675	0.00312406	0.0163437
tca-mir-11615-5p	252	16503	1908	3281	3028	1269	2168	2375	2604	1440	6335	5075	4865	2564	27	49	53	22	60	59	76	41	74	53	45	18	0.208494	0.27415	0.928125	0.649804	5.94117	4.37504	8.60798	4.47671	0.000695197	0.000143349	6.08895e-06	1.76818e-05
tca-mir-3851k-2-3p	239	16503	1908	3281	3028	1269	2168	2375	2604	1440	6335	5075	4865	2564	59	76	67	40	37	46	53	27	67	53	53	21	8.43844	5.40457	4.09975	6.03414	0.917083	1.82733	2.46907	1.17468	0.000202173	0.000817415	0.00288336	0.000610969
tca-mir-3851k-2-5p	492	16503	1908	3281	3028	1269	2168	2375	2604	1440	6335	5075	4865	2564	76	126	116	52	105	95	113	65	151	108	107	43	2.46723	3.15804	2.88796	2.10579	6.9367	3.01827	5.04631	3.54965	7.93851e-05	2.71528e-06	2.37015e-05	1.91188e-06
tca-mir-11619b-3p	210	16503	1908	3281	3028	1269	2168	2375	2604	1440	6335	5075	4865	2564	23	42	42	19	43	44	49	33	56	50	43	18	0.254394	0.355048	0.628202	0.724587	2.98731	2.45235	2.82339	3.50048	9.30899e-05	0.00678328	0.000840818	0.000857641
tca-mir-11621-3p	784	16503	1908	3281	3028	1269	2168	2375	2604	1440	6335	5075	4865	2564	118	187	169	76	153	155	166	98	262	193	187	85	2.987	2.6525	2.06816	1.81897	6.96473	5.00794	4.75958	3.98259	0.000771725	2.62934e-05	7.93259e-05	2.89062e-05
tca-mir-11621-5p	661	16503	1908	3281	3028	1269	2168	2375	2604	1440	6335	5075	4865	2564	113	175	162	73	122	126	160	90	205	157	126	58	5.18522	4.95381	4.65291	3.17762	4.50878	3.51068	8.43934	5.11881	1.4444e-05	1.24668e-05	1.30658e-10	5.00386e-08
tca-mir-11619a-3-3p	248	16503	1908	3281	3028	1269	2168	2375	2604	1440	6335	5075	4865	2564	36	55	51	23	54	46	57	34	70	64	56	20	1.205	0.795344	0.794227	0.840998	4.26119	1.55991	2.97639	2.50706	0.000202314	0.0221637	0.00378871	0.000136154
tca-mir-11619a-3-5p	522	16503	1908	3281	3028	1269	2168	2375	2604	1440	6335	5075	4865	2564	71	134	120	49	118	117	136	86	156	111	109	37	1.20029	3.35524	2.55194	1.20468	9.23556	6.66857	9.47861	8.60719	9.98507e-06	2.33362e-07	1.7507e-06	1.05527e-09
tca-mir-11617a-2-3p	506	16503	1908	3281	3028	1269	2168	2375	2604	1440	6335	5075	4865	2564	83	132	113	53	109	109	110	71	148	106	115	35	3.41922	3.63034	2.03915	2.05682	7.39125	5.40641	3.87577	4.64414	3.4057e-06	1.48187e-07	0.000141885	8.4152e-10
tca-mir-11617a-2-5p	364	16503	1908	3281	3028	1269	2168	2375	2604	1440	6335	5075	4865	2564	52	91	83	38	74	67	83	49	121	85	74	33	1.34285	2.18193	1.89775	1.65794	4.39289	1.87835	3.82202	3.05938	0.0099903	0.000414133	1.77375e-05	7.41003e-05
tca-mir-11622-3p	685	16503	1908	3281	3028	1269	2168	2375	2604	1440	6335	5075	4865	2564	97	153	134	60	137	135	158	93	228	165	176	79	1.83753	1.33035	0.729347	0.896768	6.95643	4.39151	6.85477	5.21054	0.00115986	2.11921e-05	0.00609856	0.000592617
tca-mir-11622-5p	1126	16503	1908	3281	3028	1269	2168	2375	2604	1440	6335	5075	4865	2564	177	297	260	110	220	223	247	151	337	248	243	100	5.23768	7.75688	4.84827	2.44396	9.7989	6.97333	8.15479	7.66507	2.21061e-10	3.72351e-12	1.63909e-10	2.92779e-12
tca-mir-11623-3p	142	16503	1908	3281	3028	1269	2168	2375	2604	1440	6335	5075	4865	2564	20	23	17	9	30	29	44	19	41	31	32	15	0.848858	0.0750611	0.0117806	0.180417	2.55822	1.73807	5.78856	1.65574	0.00482528	0.00496972	0.0173946	0.0260943
tca-mir-11623-5p	126	16503	1908	3281	3028	1269	2168	2375	2604	1440	6335	5075	4865	2564	13	26	22	10	33	26	31	21	34	26	22	9	0.218446	0.437407	0.26169	0.42453	4.60939	1.69079	2.45501	2.8992	0.00202171	0.0031621	0.000590782	0.00157853
tca-mir-3851g-1-3p	301	16503	1908	3281	3028	1269	2168	2375	2604	1440	6335	5075	4865	2564	69	97	86	46	49	58	65	34	86	60	63	26	8.20803	6.93839	5.35706	5.6165	1.33279	2.12162	2.54612	1.30906	8.77744e-05	5.95682e-06	0.000199491	0.000112359
tca-mir-3851g-1-5p	306	16503	1908	3281	3028	1269	2168	2375	2604	1440	6335	5075	4865	2564	45	80	66	35	67	67	75	42	81	72	74	31	1.42682	2.53615	1.19623	2.15304	5.1458	3.87653	4.61875	2.90847	2.70002e-06	0.00126469	0.00962777	0.00163673
tca-mir-11624a-1-3p	370	16503	1908	3281	3028	1269	2168	2375	2604	1440	6335	5075	4865	2564	59	99	83	38	81	85	91	53	104	97	90	39	2.37961	3.31939	1.72461	1.55871	6.02096	5.53376	5.47579	3.92033	7.61286e-06	0.0134336	0.00652785	0.00141823
tca-mir-11624a-1-5p	686	16503	1908	3281	3028	1269	2168	2375	2604	1440	6335	5075	4865	2564	104	172	157	72	126	125	144	86	210	154	157	64	2.82197	3.53292	3.02542	2.5547	4.52977	2.71635	4.04072	3.63047	3.78335e-06	2.0692e-07	2.00188e-05	3.3676e-07
tca-mir-11624a-2-3p	370	16503	1908	3281	3028	1269	2168	2375	2604	1440	6335	5075	4865	2564	59	99	83	38	81	85	91	53	104	97	90	39	2.37961	3.31939	1.72461	1.55871	6.02096	5.53376	5.47579	3.92033	7.61286e-06	0.0134336	0.00652785	0.00141823
tca-mir-11624a-2-5p	686	16503	1908	3281	3028	1269	2168	2375	2604	1440	6335	5075	4865	2564	104	172	157	72	126	125	144	86	210	154	157	64	2.82197	3.53292	3.02542	2.5547	4.52977	2.71635	4.04072	3.63047	3.78335e-06	2.0692e-07	2.00188e-05	3.3676e-07
tca-mir-3806b-1-3p	681	16503	1908	3281	3028	1269	2168	2375	2604	1440	6335	5075	4865	2564	92	156	126	54	149	159	172	97	214	154	144	69	1.31529	1.6872	0.362485	0.431238	10.3239	10.1606	10.5705	6.33991	2.89142e-05	3.78559e-07	1.43189e-07	8.2702e-06
tca-mir-3806b-1-5p	213	16503	1908	3281	3028	1269	2168	2375	2604	1440	6335	5075	4865	2564	33	60	53	23	42	49	53	29	72	45	37	14	1.49608	2.88904	2.18536	1.41972	2.60613	3.59491	3.7069	2.21761	0.042742	0.000448504	1.33996e-05	2.24219e-05
tca-mir-11624a-3-3p	313	16503	1908	3281	3028	1269	2168	2375	2604	1440	6335	5075	4865	2564	47	88	75	32	64	68	73	41	92	83	78	35	1.60252	3.80886	2.31287	1.39785	3.99584	3.81424	3.77902	2.47556	0.000212375	0.0250056	0.0180875	0.00717712
tca-mir-11624a-3-5p	686	16503	1908	3281	3028	1269	2168	2375	2604	1440	6335	5075	4865	2564	104	172	157	72	126	125	144	86	210	154	157	64	2.82197	3.53292	3.02542	2.5547	4.52977	2.71635	4.04072	3.63047	3.78335e-06	2.0692e-07	2.00188e-05	3.3676e-07
tca-mir-309c-3p	246	16503	1908	3281	3028	1269	2168	2375	2604	1440	6335	5075	4865	2564	54	70	52	28	52	52	62	35	62	62	51	20	6.00938	3.36624	0.949918	1.85134	3.78787	2.83746	4.3579	2.83646	3.18304e-06	0.01408	0.000498041	0.000162801
[truncated: 423 more rows]

## Sheet: randomly_sampled_genes_k1000
Supplementary Table 3e. Permutation test for microRNA target enrichment. MicroRNA target numbers within zygotically up- and down-regulated genes (Supplementary Table 3a) are compared with microRNA target numbers within randomly sampled genes. Mean and standard deviation of the obtained values are shown.
[truncated: 534 more rows]
