# Supplementary material for: MicroRNA evolution, expression, and function during short germband development in Tribolium castaneum
Source: Genome Res. 2016 Jan;26(1):85–96. doi: 10.1101/gr.193367.115 (PMC4691753; doi:10.1101/gr.193367.115)
Supplement: Supplemental Material [file supp_gr.193367.115_Supplemental_Table4.xlsx]

## Sheet: htseq
Supplemental Table 4.Sylamer analysis of 6-mer word enrichment in the 3'UTR sequences of zygotically down- regulated genes. Input gene sets consist of genes significantly down-regulated (<2-fold change, p<0.05) between oocytes and 8-16 h, 16-24 h and 24-48 h of embryonic development. Top 20 most highly enriched words for each set are shown, together with any microRNA that have a complementary reg…
downregulated from oocytes to 8-16 h embryos
word	-log10(p) enrichment	microRNA	position
CTAGTC	17.2834	tca-mir-279-3p	2-7
GTGATA	15.3201	tca-mir-2/13/2944-3p	1-6
CGTACT	11.7001	mir-3851b-f family/3889/3840/3841-3p	2-7
TGTGAT	10.2944	tca-mir-2/11/13/2944/308-3p	2-7
TAGTCA	9.87685	tca-mir-279-3p	1-6
CCAAAG	7.62276	tca-mir-9-5p	2-7
AGTCAT	7.28805	-	-
ATTTAT	7.25809	-	-
CCCAGT	6.74902	tca-mir-309/3836-3p	3-8
ACGTAC	5.89511	mir-3851b-f-3-p	3-8
CCAGTG	5.79211	tca-mir-309/3836-3p	2-7
CATTCC	5.70158	tca-mir-1-3p	2-7
TCTAGT	5.54786	tca-mir-279-3p	3-8
CTGTGA	5.43596	tca-mir-2/11/13/2944/308-3p	3-8
GTACTA	4.83911	mir-3851 family/3889/3840/3841-3p	1-6
CAAAGA	4.41463	tca-mir-9-5p	1-6
TCCCAG	4.40992	-	-
ACTTAA	4.33658	tca-mir-252b-5p	1-6
GCAATA	4.08412	tca-mir-137-3p,tca-mir-92a,c-3p	2-7,'1-6
TTGTTA	3.85144	-	-
downregulated from oocytes to 16-24 h embryos
word	-log10(p) enrichment	microRNA	position
GTGATA	12.616	tca-mir-2/13/2944-3p	1-6
CTAGTC	12.3326	tca-mir-279-3p	2-7
TGTGAT	10.6598	tca-mir-2/11/13/2944/308-3p	2-7
TAGTCA	8.43987	tca-mir-279-3p	1-6
CCAAAG	7.07058	tca-mir-9-5p	2-7
AGTCAT	5.71597	-	-
TCTAGT	5.51058	tca-mir-279-3p	3-8
CAGTAT	4.98787	tca-mir-8-3p,tca-mir-11625a/b-3p	3-8
CGTACT	4.67015	mir-3851b-f family/3889/3840/3841-3p	2-7
TGATAT	4.59554	tca-mir-283-5p	3-8
CATTCC	4.48344	tca-mir-1-3p	2-7
CCAGTG	4.38262	tca-mir-309/3836-3p	2-7
TCCTTT	4.08772	tca-mir-11622-5p	2-7
GTCATT	3.94751	-	-
CTGAAC	3.79065	tca-mir-3862-3p	1-6
GCCAAA	3.74233	candidate93-3p	1-6
TGTTAA	3.64056	tca-mir-3883-3p	2-7
CTGTGA	3.619	tca-mir-2/11/13/2944/308-3p	3-8
GCTTTA	3.40767	tca-mir-3843/3893/9-3p,	2-7
TAGTCG	3.30877	tca-mir-309b-5p	1-6
downregulated from oocytes to 24-48 h embryos
word	-log10(p) enrichment	microRNA	position
GTGATA	14.1374	tca-mir-2/13/2944-3p	1-6
TGTGAT	10.8135	tca-mir-2/11/13/2944/308-3p	2-7
CTAGTC	6.2828	tca-mir-279-3p	2-7
CATTCC	5.06395	tca-mir-1-3p	2-7
CAGTAT	4.60433	tca-mir-11625a/b-3p,tca-mir-8-3p	3-8
GAGATT	4.59066	tca-mir-3477-5p	2-7
TCTAGT	4.5407	tca-mir-279-3p	3-8
TGATAT	4.4679	tca-mir-283-5p	3-8
TAGTCA	4.33344	tca-mir-279-3p	1-6
CGAATA	3.61804	-
TTCTTG	3.58622	-
ACAAAT	3.56378	-
GGGGCA	3.5488	-
CTGTGA	3.35434	tca-mir-2/11/13/2944/308-3p	3-8
ATTTAT	3.26326	-
ATAAAG	3.23384	-
GTCATT	3.21219	-
CTGAAC	3.14712	tca-mir-3862-3p	1-6
CCAAAG	3.08594	tca-mir-9-5p	2-7
ACTTAA	2.97474	tca-mir-252b-5p	1-6
