# Supplementary material for: MicroRNA evolution, expression, and function during short germband development in Tribolium castaneum
Source: Genome Res. 2016 Jan;26(1):85–96. doi: 10.1101/gr.193367.115 (PMC4691753; doi:10.1101/gr.193367.115)
Supplement: Supplemental Material [file supp_gr.193367.115_Supplemental_Table5.xlsx]

## Sheet: Sheet1
Supplemental Table 5. Reagents used in immunohistochemistry and in situ hybridization
PCR primers for RNA probe synthesis
Sequence	Description
CGAAATTTCTGCCAGGTCCA	tca-mir-3836e,forward primer
AAGAACGCGCATTTTACAAA	tca-mir-3836e,reverse primer
TGCTTCATAATACCAGACACTCC	tca-mir-3851l-2,forward primer
GACCGGGCAGAAATTTCGAA	tca-mir-3851l-2,reverse primer
GAACCAATCAGAAAAGGGGTACT	tca-mir-3851g-2~tca-mir-11624a-,forward primer
CAAGCAGGCTAGGAGACAGA	tca-mir-3851g-2~tca-mir-11624a,reverse primer
TCCCAACGCTGTATAAGGCA	tca-mir-3836g-2,forward primer
AAATTGCTTCTTCTGCGGCA	tca-mir-3836g-2,reverse primer
CAGTGCTGGATTTGGAAACA	mir-3889~3843,forward primer
TCCACTAAAGCCACATCAACA	mir-3889~3843,reverse primer
CCTGCAAATGAAGAGTGGGG	mir-9d-3791,forward primer
TAGGTCGCCCAGATGAACAG	mir-9d-3791,reverse primer
Primary and secondary antibodies
Antibody	Manufacturer
sheep anti-DIG	Roche
mouse anti-RNA Polymerase II H5	Covance
mouse anti-engrailed (4D9)	DSHB
anti-sheep Alexa Fluor®555	Life Technologies
anti-mouse Alexa Fluor®488	Life Technologies
